# Supplementary material for: Gene expression variations and allele-specific expression of two rice and their hybrid in caryopses at single-nucleus resolution
Source: Front Plant Sci. 2023 May 23;14:1171474. doi: 10.3389/fpls.2023.1171474 (PMC10242081; doi:10.3389/fpls.2023.1171474)
Supplement: Supplementary file 2 [file DataSheet_2.xlsx]

## Sheet: Table S1
Table S1. Cell Ranger Summary
Sample ID	Nipponbare	9311	Hybrid
Depth (Number of Reads)	184 M	377M	277 M
Cell Ranger V3.0.1 Raw Cells	346	3001	270
Mean Reads per Cell	532778	125622	1027025
Median Genes per Cell	456	923	852
Median UMI Counts per Cell	597	1402	1076
Total Genes Detected	20156	27213	21817
Valid Barcodes	0.929	0.961	0.922
Sequencing Saturation	0.969	0.841	0.987
Fraction Reads in Cells	0.124	0.249	0.196
Reads Mapped to Genome	0.867	0.931	0.832
Reads Mapped Confidently to Intergenic Regions	0.057	0.086	0.082
Reads Mapped Confidently to Intronic Regions	0.04	0.094	0.057
Qualified Cells	336	2748	261
Qualified Genes	14564	23638	16294
Cell Ranger Version	6.0.1	6.0.1	6.0.1

## Sheet: Table S2A
Table S2A. Cluster-enriched genes in rice seed
gene	p_val 1	avg_log2FC 2	pct.1 3	pct.2 4	p_val_adj 5	cluster	Symbol	Name	Description	PMID
Os01g0356800	2.04e-180	2.70643	0.891	0.419	4.42e-176	1			Domain of unknown function DUF3406, chloroplast translocase domain containing protein.
Os04g0645100	8.5e-147	1.19351	0.732	0.23	1.85e-142	1	FLO2, flo2, flo3(t)	FLOURY ENDOSPERM 2, floury endosperm2, floury endosperm 2, floury endosperm-2, Floury 2	Tetratricopeptide repeat (TPR) domain containing protein, Grain size and starch quality
Os04g0164900	1.75e-146	1.22485	0.839	0.347	3.8e-142	1	OsPUL, OsPUL3	pullulanase, R-enzyme, starch debranching enzyme	Pullulanase-type starch debranching enzyme (EC 3.2.1.41)
Os06g0726400	2.28e-122	1.13353	0.96	0.778	4.95e-118	1	BEI, SBE1	branching enzyme I, starch branching enzyme1	Starch branching enzyme
Os02g0777700	1.31e-109	0.797525	0.475	0.102	2.85e-105	1			Similar to XI-I (Myosin-like protein XI-I); motor/ protein binding.
Os01g0633100	7.88e-106	1.05608	0.944	0.707	1.71e-101	1	AGPL2, OsAGPL2, osagpl2, APL2, OsAPL2, AGPiso, sh2, Sh2	ADP-GLUCOSE PYROPHOSPHORYLASE LARGE SUBUNIT 2, sativa ADP-glucose pyrophosphorylase large subunit 2, ADP-glucose Pyrophosphorylase large subunit 2, AGPase large subunit 2, AGPase large unit 2, ADP-glucose pyrophosphorylase subunit SH2	ADP-glucose pyrophosphorylase large subunit, Controll of starch biosynthesis in endosperm development
Os03g0340500	1.22e-97	0.818514	0.651	0.238	2.65e-93	1			Similar to Sucrose synthase (EC 2.4.1.13).
Os06g0133000	5.35e-95	1.60143	0.933	0.805	1.16e-90	1	Wx	waxy, Waxy	Granule-bound starch synthase, Synthesis of amylose in endosperm
Os12g0244100	2.25e-94	0.856875	0.831	0.479	4.88e-90	1	FLO11, OsHsp70cp-2, OsHsp70CP2	FLOURY ENDOSPERM11, heat shock protein 70 chloroplast protein 2	Plastid heat shock protein 70, Amyloplast development, Regulation of protein import into amyloplast
Os08g0160500	4.37e-91	1.25628	0.59	0.214	9.5e-87	1	CSLF6, OsCslF6, OsCSLF6	CELLULOSE SYNTHASE LIKE F6	MLG (mixed-linkage glucan) synthase, Biosynthesis of MLG (cell wall polysaccharide)
Os06g0675700	7.33e-87	1.10796	0.588	0.229	1.59e-82	1	ONG2		&alpha;-glucosidase, Alpha-glucosidase in rice seeds, Two isoforms (ONG2-I and ONG2-II) are produced by post-translational proteolysis
Os03g0240500	1.3e-85	0.788728	0.632	0.246	2.81e-81	1			Similar to Toc34-2 protein.
Os05g0569400	1.71e-85	0.612264	0.444	0.112	3.71e-81	1			Similar to apospory-associated protein C.
Os01g0234850	1.68e-84	0.592118	0.494	0.141	3.66e-80	1			Hypothetical conserved gene.
Os08g0345800	1.49e-82	0.826931	0.784	0.43	3.25e-78	1	OsAGPS2b	ADP-glucose pyrophosphorylase small subunit 2b	Cytosolic ADP-glucose pyrophosphorylase small subunit 2b, Starch synthesis in the middle to late stage of developing endosperm
Os06g0208700	6.8e-80	0.675672	0.462	0.131	1.48e-75	1			Similar to Dual-specificity phosphatase protein.
Os02g0528200	1.49e-77	0.755474	0.946	0.74	3.25e-73	1	SBE3, SBEIII*, SBEIII, Sbe3, RBE3, QEIIa, QEIIA, BEIIb, BEIIB, SBEIIb, OsBEIIb, sbe3, SBE III	STARCH BRANCHING ENZYME 3, starch branching enzyme3, starch branching enzyme 3, Starch branching enzyme III, Starch branching enzyme-3, starch branching enzyme IIb, branching enzyme-3	Starch branching enzyme 3, Starch synthesis
Os08g0191433	2.52e-77	0.820466	0.653	0.275	5.47e-73	1	SSIIIA, OsSSIIIa, SSIII-2, SS3A, OsSSSIIIa	SOLUBLE STARCH SYNTHASE IIIA, SOLUBLE STARCH SYNTHASE III-2	Starch synthase, Starch biosynthesis
Os07g0557100	4.97e-77	0.753802	0.397	0.101	1.08e-72	1	OsENT2	equilibrative nucleoside transporter 2	Equilibrative nucleoside transporter 2, Transport of nucleoside-type cytokinin
Os02g0799000	6.36e-73	0.718013	0.534	0.198	1.38e-68	1	OsPP2C27	protein phosphatase 2C 27	Protein phosphatase 2C 27, Negative regulation of cold tolerance
Os01g0667700	3.24e-71	0.644485	0.354	0.084	7.04e-67	1			Zinc finger, RING/FYVE/PHD-type domain containing protein.
Os08g0160700	9.56e-70	0.771482	0.412	0.118	2.08e-65	1			Non-protein coding transcript.
Os06g0625400	4.63e-69	0.62069	0.6	0.251	1.01e-64	1	SPP	stromal processing peptidase	Stromal processing peptidase, Chloroplast biogenesis, Root development
Os03g0654700	4e-60	0.621288	0.523	0.21	8.69e-56	1			Protein of unknown function DUF1637 family protein.
Os04g0471400	6.95e-52	0.602558	0.464	0.186	1.51e-47	1			Similar to H0418A01.7 protein.
Os03g0758100	1.41e-46	0.5824	0.778	0.52	3.07e-42	1	OsPho1	Starch phosphorylase 1	Starch phosphorylase, Alpha-glucan phosphorylase, Starch biosynthesis in rice endosperm at low temperature
Os04g0390100	3.18e-41	0.650932	0.73	0.496	6.92e-37	1			Heavy metal transport/detoxification protein domain containing protein.
Os06g0498800	4.19e-32	0.732726	0.377	0.171	9.11e-28	1	OsMFT1	MOTHER OF FT AND TFL1	Homolog of Arabidopsis MOTHER OF FT AND TFL1, Regulation of heading and panicle architecture
Os08g0545200	2.59e-26	0.740379	0.751	0.609	5.63e-22	1			Alcohol dehydrogenase superfamily, zinc-containing protein.
Os07g0160100	2.78e-204	0.986693	0.485	0.024	6.04e-200	2	YAB1, OsYAB1, FIL1, osFIL1	YABBY1, YABBY1 gene, YABBY 1, OsYABBY1, , Os YABBY1, FILAMENTOUS FLOWER 1, Protein YABBY 1, Protein FILAMENTOUS FLOWER 1, FIL homolog 1	YABBY family transcription factor, Stamen and carpel development, Feedback regulation of gibberellin biosynthesis
Os12g0621100	1.56e-184	0.756915	0.443	0.022	3.38e-180	2			Similar to Filamentous flower-like yabby protein (Fragment).
Os03g0147400	2.18e-164	0.979489	0.545	0.049	4.73e-160	2	Z3	zebra3	Putative citrate transporter, Citrate-metal hydrogen symport (CitMHS) family protein, Citrate transport and distribution during leaf development
Os03g0861100	3.8e-146	0.738782	0.439	0.034	8.26e-142	2			Conserved hypothetical protein.
Os03g0602300	8.54e-129	0.602104	0.337	0.019	1.85e-124	2	OsBRD1, OsDWARF	BR-deficient dwarf1	C6-oxidase, Brassinosteroid biosynthetic enzyme, Brassinosteroid biosynthesis, Organization and elongation of the leaf and stem cells, Regulation of root growth
Os06g0336200	4.78e-123	0.666255	0.367	0.027	1.04e-118	2			Delta-tonoplast intrinsic protein.
Os05g0227600	1.09e-119	0.658362	0.322	0.02	2.36e-115	2	OsRePRP1.2	REPETITIVE PROLINE-RICH PROTEIN 1.2	Proline-rich glycoprotein, ABA-dependent inhibition of root growth
Os07g0677300	8.1e-102	0.615552	0.231	0.009	1.76e-97	2			Peroxidase.
Os03g0103300	3.62e-99	1.05321	0.424	0.056	7.86e-95	2	qLTG-3-1(t), qLTG-3-1(t), qLTG3-1, OsHyPRP05, OsHyPRP5, HyP/GRP05, HyP/GRP5	low-temperature germianability (QTL)-3-1(t), hybrid proline- or glycine-rich protein 5	Hybrid proline- or glycine-rich protein, Controll of low-temperature germinability, Pre-harvest sprouting resistance
Os02g0703600	5.56e-92	0.597386	0.295	0.024	1.21e-87	2	OsABA8ox1, CYP707A5	ABA 8'-hydroxylase 1	ABA 8'-hydroxylase, Response to submergence
Os03g0353400	2.26e-85	1.2103	0.761	0.263	4.91e-81	2			Similar to Poly(A)-binding protein C-terminal interacting protein 6.
Os08g0189100	1.32e-82	1.5038	0.598	0.155	2.86e-78	2	GLP8-2, OsGLP8-2, GER3, OsGER3, GLP16, OsEnS-117	GERMIN-LIKE PROTEIN 8-2, Germin-like protein 8-2, Germin-like protein 3, Germin-like protein 16, endosperm-specific gene 117	Germin-like protein 8-2, Disease resistance
Os03g0237600	1.88e-75	0.595276	0.318	0.039	4.09e-71	2			Similar to ATMAP65-6; microtubule binding.
Os05g0548900	4.72e-75	0.660509	0.292	0.032	1.02e-70	2			Similar to Phosphoethanolamine methyltransferase.
Os11g0545300	5.77e-74	0.769143	0.443	0.084	1.25e-69	2	OsSpo11-5		Homologue of the archaeal topoisomerase VIA
Os02g0626400	1.57e-69	0.651825	0.417	0.079	3.41e-65	2			Phenylalanine ammonia-lyase (EC 4.3.1.5).
Os07g0661400	7.86e-62	0.695384	0.504	0.128	1.71e-57	2			Conserved hypothetical protein.
Os03g0246500	8.35e-57	0.649319	0.436	0.106	1.81e-52	2			Protein of unknown function DUF869, plant family protein.
Os05g0495300	6.98e-56	0.983214	0.898	0.552	1.52e-51	2			Conserved hypothetical protein.
Os01g0200700	1.34e-51	0.614669	0.402	0.096	2.9e-47	2	OsMT-3a	MT-like type 3, metallothionein-like type 3	Metallothionein-like protein, Tolerance to salinity and heavy metal stresses, Abiotic stress response
Os08g0157600	5.66e-50	0.881304	0.489	0.155	1.23e-45	2	CCA1, OsCCA1, OsLHY, LHY-like_chr.8, COC1	CIRCADIAN CLOCK ASSOCIATED 1, LATE ELONGATED HYPOCOTYL	MYB transcription factor, Circadian clock
Os03g0227800	2.14e-39	1.04238	0.909	0.756	4.65e-35	2			Similar to cDNA clone:001-042-G02, full insert sequence.
Os04g0119500	7.74e-35	0.586727	0.458	0.164	1.68e-30	2			Similar to Membrane related protein-like.
Os10g0501500	3.94e-32	0.769374	0.42	0.154	8.57e-28	2			Protein of unknown function DUF607 family protein.
Os09g0109600	2.31e-169	0.901732	0.407	0.019	5.01e-165	3	OsDSSR1	O. sativa drought and salt stress response-1	Small peptide, Drought tolerance
Os04g0510900	3.64e-164	0.923622	0.486	0.035	7.92e-160	3			Similar to Embryo-specific protein 1 (ATS1).
Os03g0322900	4.7e-145	0.76955	0.387	0.022	1.02e-140	3	LEA17, OsLEA17, OsLEA3-2, LEA3-2	LATE EMBRYOGENESIS ABUNDANT PROTEIN 17, late embryogenesis abundant protein 17	Late embryogenesis abundant (LEA) protein, Abiotic stress tolerance
Os05g0349800	1.02e-123	1.13689	0.473	0.052	2.21e-119	3	OsEm1, OsLEA21	late embryogenesis abundant protein 21	Group I late embryogenesis abundant (LEA) protein, Positive regulation of drought tolerance
Os04g0275950	5.12e-115	0.900093	0.56	0.08	1.11e-110	3			Conserved hypothetical protein.
Os06g0168700	1.48e-111	1.77534	0.432	0.049	3.22e-107	3			Similar to Prolin rich protein.
Os02g0700100	4.86e-111	1.16955	0.309	0.019	1.06e-106	3	CDC20.2	Cell Division Cycle 20.2	Cell Division Cycle 20 (CDC20) protein, Cell cycle regulator, Required for faithful meiotic chromosome segregation and cytokinesis
Os01g0705200	1.01e-105	0.834021	0.461	0.059	2.19e-101	3			Late embryogenesis abundant protein repeat containing protein.
Os12g0621900	1.87e-104	0.781887	0.481	0.066	4.07e-100	3			Similar to Mov34/MPN/PAD-1 family protein, expressed.
Os02g0530600	2.03e-104	0.604488	0.383	0.036	4.41e-100	3	OsPARP3	poly(ADP-ribose) polymerase 3	Poly(ADP-ribose) polymerase, Double-strand break (DSB) repair, Likely to be involved in the Ku-independent alternative non-homologous end-joining pathway (A-NHEJ pathway)
Os03g0197300	1.05e-102	0.878383	0.473	0.065	2.29e-98	3			Similar to Cupin family protein, expressed.
Os03g0159600	2.92e-102	0.992274	0.412	0.046	6.36e-98	3			Similar to Rab28 protein.
Os01g0391100	8.35e-102	0.723138	0.432	0.052	1.82e-97	3			Hypothetical gene.
Os05g0569500	6.88e-98	0.72409	0.362	0.036	1.5e-93	3			Similar to Embryo-specific protein.
Os11g0451700	1.77e-77	0.685794	0.284	0.027	3.84e-73	3			Similar to Dehydrin DHN1 (M3) (RAB-17 protein).
Os11g0184900	1.64e-72	0.612923	0.346	0.047	3.56e-68	3	NAC5, OsNAC5, NAC71, ONAC071, ONAC009, ONAC9, ONAC020, ONAC20, OnNAC5*, OnNAC5, OsNAC5/ONAC009	NAC DOMAIN-CONTAINING PROTEIN 5, NAC 5, NAC domain-containing protein 71, ONNAC GENE 5, OsNAC gene-5, NAC domain-containing protein 9, NAC domain-containing protein 20, OnNAC gene-5	NAC-type transcription factor, Regulation of stress-inducible genes, Stress tolerance
Os06g0696400	7.08e-57	0.738955	0.449	0.104	1.54e-52	3			Xyloglycan endo-transglycosylase precursor.
Os08g0127900	9.21e-55	1.02369	0.235	0.028	2e-50	3			Similar to Globulin 1 (Fragment).
Os03g0699000	4.95e-52	0.605159	0.51	0.14	1.07e-47	3	OLE18	oleosin 18 kDa	Oleosin 18 kDa, Seed oil body oleosin H-isoform
Os04g0546500	1.1e-50	0.700971	0.519	0.152	2.38e-46	3	OLE16	oleosin 16 kDa	Oleosin 16 kDa, Seed oil body oleosin L-isoform
Os01g0884300	1.54e-50	0.696991	0.449	0.117	3.35e-46	3	OsNAC6	NAC transcription factor 6	NAC transcription factor, Drought tolerance, Response to abiotic and biotic stresses
Os03g0793700	1.66e-38	0.704193	0.321	0.078	3.61e-34	3	OsCDP3.10, qSP3	cupin domain protein 3.10, QTL for seedling percentage 3	Cupin domain protein, Regulation of seed vigour
Os05g0542500	2.98e-38	0.685934	0.309	0.072	6.48e-34	3	OsLEA3-1	Late embryogenesis abundant protein 3-1	Late embryogenesis abundant (LEA) protein, Drought and salt stress response
Os08g0408500	3.95e-38	0.676561	0.403	0.119	8.59e-34	3	OsERF48, OsDRAP1	ethylene response factor 48, Drought Responsive AP2/EREBP gene 1	Drought-inducible transcriptional activator, ERF transcription factor, Regulation of calmodulin-like protein, Drought tolerance, Salt tolerance
Os03g0327600	4.4e-34	0.605963	0.49	0.187	9.56e-30	3	OsEULD1b	Euonymus lectin D1b	D-type euonymus-related lectin (EUL), "Response to salt and drought stress, hormone treatment", Response to biotic treatment
Os09g0369000	3.34e-32	0.727	0.634	0.322	7.26e-28	3	OsDREB6	dehydration-responsive element-binding protein 6	A-6 type of DREB transcription factor, AP2/EREBP family protein, Positive regulation of tolerance to osmotic and cold stress
Os05g0111300	2.07e-24	0.737823	0.247	0.068	4.51e-20	3	OsMT2b	METALLOTHIONEIN2b	Metallothionein, Reactive oxygen species (ROS) scavenger protein, Root development and seed embryo germination, Distribution of Zn to grain
Os11g0582400	2e-12	0.634719	0.321	0.162	4.34e-08	3			Similar to Embryo-specific protein.
Os02g0268100	9.78e-75	1.52219	0.953	0.713	2.13e-70	4			Similar to Glutelin (Fragment).
Os03g0427300	3.04e-73	1.50686	0.949	0.827	6.62e-69	4			Glutelin type-A III precursor.
Os10g0400200	4.89e-72	1.54669	0.949	0.815	1.06e-67	4	OsGluA2	Glutelin type-A 2, Glutelin type-A 2 precursor	Glutelin type-A2 precursor, Regulation of grain protein content
Os02g0268300	7.39e-68	1.27209	0.897	0.584	1.61e-63	4			Similar to Glutelin (Fragment).
Os01g0762500	2.82e-58	1.61791	0.949	0.846	6.12e-54	4	GluA-1	Glutelin A-1	Glutelin A-1
Os07g0219300	1.87e-56	0.889613	0.252	0.029	4.07e-52	4			Prolamin precursor (13 kDa prolamin).
Os03g0766100	1.38e-54	1.27037	0.991	0.895	3e-50	4			10 kDa prolamin precursor.
Os07g0206500	4.82e-53	1.64507	0.958	0.882	1.05e-48	4			13 kDa prolamin precursor.
Os06g0507200	3.2e-51	1.20377	0.907	0.702	6.96e-47	4			Bifunctional inhibitor/plant lipid transfer protein/seed storage domain containing protein.
Os11g0535525	9.13e-51	1.21461	0.963	0.784	1.98e-46	4			Similar to 10 kDa prolamin.
Os07g0219400	1.06e-50	0.93949	0.229	0.027	2.3e-46	4			Prolamin precursor.
Os02g0453600	6.3e-50	1.4126	0.925	0.75	1.37e-45	4			Similar to Glutelin.
Os05g0499100	1.13e-49	1.19208	0.958	0.866	2.46e-45	4			26 kDa globulin (Alpha-globulin).
Os05g0328800	2.44e-48	0.765641	0.248	0.033	5.31e-44	4			Prolamin 7.
Os02g0242600	1e-47	1.06436	0.85	0.476	2.18e-43	4			Similar to Glutelin.
Os03g0130300	5.87e-40	0.929285	0.85	0.575	1.28e-35	4	OsDEF8	defensin 8	Defensin, Plant antimicrobial peptide, Pathogen defense
Os07g0206400	3.95e-33	1.47211	0.864	0.738	8.59e-29	4			13 kDa prolamin precursor.
Os07g0215500	9.33e-32	1.16756	0.897	0.817	2.03e-27	4			Allergenic protein.
Os11g0660500	1.48e-30	1.11988	0.776	0.502	3.22e-26	4	TCTP, OsTCTP, OsTCTPa	21 kDa polypeptide, translationally controlled tumor protein, TCTP homolog	Translationally controlled tumor protein, Mercury tolerance
Os07g0492000	1.61e-30	0.751631	0.631	0.311	3.51e-26	4	OsNDPK1	NUCLEOSIDE DIPHOSPHATE KINASE 1, Nucleoside diphosphate kinase 1	Nucleoside diphosphate kinase, Cell elongation process in coleoptile
Os02g0249000	4.22e-30	0.81758	0.785	0.601	9.18e-26	4	GLUD1, GluD1, GluD-1, OsEnS-33	GLUTELIN D, Glutelin type-D, endosperm-specific gene 33	Glutelin, Seed strage protein
Os10g0539600	2.18e-29	0.728819	0.888	0.657	4.74e-25	4	SPK	seed-specific protein kinase	Calcium-dependent protein kinase, Sucrose synthase kinase, Storage product accumulation during seed development
Os12g0269200	7.61e-26	1.11675	0.897	0.849	1.65e-21	4			Similar to Prolamin precursor.
Os07g0214600	1.05e-23	1.10659	0.724	0.519	2.27e-19	4			Similar to Seed allergenic protein RA17 precursor.
Os06g0246000	6.03e-23	0.782212	0.617	0.343	1.31e-18	4			Similar to HvB12D protein (B12Dg1 protein).
Os05g0331532	1.05e-22	0.669749	0.453	0.201	2.27e-18	4			Similar to Prolamin.
Os02g0249600	1.92e-22	1.37909	0.402	0.171	4.18e-18	4			Similar to Glutelin.
Os02g0508100	7.26e-21	0.597531	0.374	0.149	1.58e-16	4			Similar to OSIGBa0075F02.3 protein.
Os05g0328632	1.27e-19	0.838519	0.612	0.422	2.76e-15	4			Similar to Prolamin.
Os07g0213800	1.67e-17	0.952694	0.579	0.388	3.62e-13	4			Similar to Allergenic protein.
Os07g0216700	6.57e-17	1.05751	0.771	0.605	1.43e-12	4			Bifunctional trypsin/alpha-amylase inhibitor domain containing protein.
Os06g0686700	9.19e-16	0.645042	0.495	0.286	2e-11	4			Non-protein coding transcript.
Os07g0214300	8.92e-15	1.23922	0.771	0.676	1.94e-10	4	RAG2		16-kDa alpha-amylase/trypsin inhibitor, Seed storage protein, Allergen protein, Regulation of grain weight and seed quality
Os07g0214100	1.52e-14	0.955221	0.509	0.334	3.3e-10	4			Seed allergenic protein RA17 precursor.
Os01g0838350	1.56e-12	0.711679	0.523	0.332	3.39e-08	4			Conserved hypothetical protein.
Os12g0269600	3.61e-12	1.00552	0.678	0.765	7.84e-08	4			Similar to Prolamin.
Os07g0216600	1.16e-11	0.973328	0.631	0.504	2.52e-07	4			Bifunctional trypsin/alpha-amylase inhibitor domain containing protein.
Os08g0345800	1.29e-11	0.667961	0.664	0.473	2.8e-07	4	OsAGPS2b	ADP-glucose pyrophosphorylase small subunit 2b	Cytosolic ADP-glucose pyrophosphorylase small subunit 2b, Starch synthesis in the middle to late stage of developing endosperm
Os01g0356800	1.63e-11	0.839539	0.678	0.48	3.55e-07	4			Domain of unknown function DUF3406, chloroplast translocase domain containing protein.
Os05g0432200	3.45e-06	0.801391	0.35	0.234	0.0749739	4			Similar to Gibberellin-regulated protein 2 precursor.
Os05g0140800	1.21e-258	1.41967	0.698	0.032	2.64e-254	5			Similar to Dormancy related protein (Fragment).
Os04g0390800	8.74e-221	1.15512	0.611	0.028	1.9e-216	5			NAD(P)-binding domain containing protein.
Os05g0314700	6.15e-219	1.20759	0.722	0.045	1.34e-214	5			Conserved hypothetical protein.
Os10g0470100	3.51e-189	1.83731	0.667	0.048	7.62e-185	5			Conserved hypothetical protein.
Os04g0275950	3.26e-176	1.41096	0.784	0.08	7.08e-172	5			Conserved hypothetical protein.
Os02g0644000	5.12e-155	0.777996	0.512	0.031	1.11e-150	5	OsVPE3, REP-2	vacuolar processing enzyme 3	Vacuolar processing enzyme, Asparaginyl endopeptidase, Mediationn of GA-induced programmed cell death in aleurone layers
Os07g0298900	5.32e-155	0.704199	0.395	0.015	1.16e-150	5			Heavy metal transport/detoxification protein domain containing protein.
Os02g0503900	1.08e-145	0.597666	0.383	0.015	2.34e-141	5			Cytochrome P450 family protein.
Os02g0725900	5.13e-114	1.13774	0.401	0.027	1.11e-109	5	HAP3K, OsHAP3K/OsNF-YB1, OsHAP3K, OsNF-YB1, nf-yb1, OsLEC1, OsNF-YB-1, NFYB1, OsEnS-41	HAP3K SUBUNIT OF CCAAT-BOX BINDING COMPLEX, Nuclear transcription factor Y subunit B-1, CCAAT-binding transcription factor subunit NF-YB1, leafy cotyledon 1, endosperm-specific gene 41, Nuclear Factor YB1	Component of the NF-Y/HAP transcription factor complex, Regulation of endosperm development
Os01g0372100	4.46e-108	0.689153	0.457	0.039	9.69e-104	5			Hypothetical gene.
Os02g0819400	4.64e-103	0.806579	0.531	0.059	1.01e-98	5	LPA1, OsLpa1.1, Oslpa1, Lpa1, OsLpa1	LOW PHYTIC ACID 1, Low phytic acid-1, low phytic acid 1	Phytic acid metabolism
Os08g0544400	5.98e-97	0.660225	0.315	0.018	1.3e-92	5	OsPDR1, OsPDR1.1, OsABCG45	pleiotropic drug resistance 1	A member of the pleiotropic drug resistance (PDR) subfamily of ATP-binding cassette (ABC) transporter, Regulation of plant growth and pathogen resistance
Os11g0698567	1.97e-95	1.12286	0.222	0.007	4.29e-91	5			Conserved hypothetical protein.
Os03g0159600	2.91e-93	0.760676	0.481	0.052	6.33e-89	5			Similar to Rab28 protein.
Os03g0793700	2.13e-91	0.79355	0.549	0.073	4.63e-87	5	OsCDP3.10, qSP3	cupin domain protein 3.10, QTL for seedling percentage 3	Cupin domain protein, Regulation of seed vigour
Os03g0142800	1.7e-89	0.727698	0.574	0.083	3.69e-85	5	OsMRP5	multidrug resistance-associated protein 5	Multidrug resistance-associated protein (MRP) ATP-binding cassette (ABC) transporter, Rice orthologue of the maize Lpa1 gene, Phytic acid metabolism
Os06g0651200	7.61e-86	0.69496	0.414	0.042	1.65e-81	5			Conserved hypothetical protein.
Os10g0430900	4.23e-81	0.819847	0.494	0.069	9.2e-77	5			Tyrosine protein kinase domain containing protein.
Os11g0582400	9.09e-78	1.64896	0.667	0.149	1.98e-73	5			Similar to Embryo-specific protein.
Os07g0668600	1.21e-76	1.18814	0.636	0.133	2.62e-72	5	OsGZF1	GluB-1-binding Zinc Finger 1	CCCH type zinc finger protein, Regulation of the seed storage protein GluB-1
Os05g0542500	7.33e-76	0.73113	0.488	0.068	1.59e-71	5	OsLEA3-1	Late embryogenesis abundant protein 3-1	Late embryogenesis abundant (LEA) protein, Drought and salt stress response
Os03g0192700	1.19e-74	0.960296	0.741	0.186	2.59e-70	5	INO1, RINO1	myo-inositol 3-phosphate synthase 1, 1D-myo-inositol 3-phosphate synthase 1	Myo-inositol 3-phosphate synthase 1, Phytic acid biosynthesis, Determination of phytic acid accumulation in grain
Os04g0546500	5.26e-64	1.05115	0.648	0.155	1.14e-59	5	OLE16	oleosin 16 kDa	Oleosin 16 kDa, Seed oil body oleosin L-isoform
Os03g0689300	1.5e-61	0.683295	0.438	0.071	3.26e-57	5	OSA1	plasma membrane H<sup>+</sup>-ATPase 1	Plasma membrane H<sup>+</sup>-ATPase 1, Regulation of ammonium (NH<sub>4</sub><sup>+</sup>) uptake, Regulation of stomatal opening for C fixation, Control of photosynthesis
Os02g0530600	1.89e-50	0.60732	0.333	0.048	4.11e-46	5	OsPARP3	poly(ADP-ribose) polymerase 3	Poly(ADP-ribose) polymerase, Double-strand break (DSB) repair, Likely to be involved in the Ku-independent alternative non-homologous end-joining pathway (A-NHEJ pathway)
Os01g0717000	1.26e-48	0.62928	0.401	0.072	2.74e-44	5			Similar to GmCK1p (EC 2.7.1.32).
Os03g0111300	5.37e-47	0.934316	0.494	0.117	1.17e-42	5			Nonspecific lipid-transfer protein 2 (nsLTP2) (7 kDa lipid transfer protein).
Os01g0919900	9.81e-46	0.620756	0.475	0.109	2.13e-41	5	OsSSI2		Fatty acid desaturase, Rice ortholog of SSI2, Negative regulation of defense responses
Os03g0699000	1.03e-42	0.960414	0.537	0.148	2.25e-38	5	OLE18	oleosin 18 kDa	Oleosin 18 kDa, Seed oil body oleosin H-isoform
Os03g0336100	1.83e-42	0.750856	0.556	0.159	3.99e-38	5			11-S plant seed storage protein family protein.
Os08g0498400	8.41e-33	0.766692	0.691	0.304	1.83e-28	5	ROMT-17	O-methyltransferase 17	O-methyltransferase
Os12g0115100	9e-30	0.696562	0.321	0.073	1.96e-25	5			Nonspecific lipid-transfer protein 1 precursor (LTP 1) (PAPI).
Os06g0648200	1.84e-28	0.719563	0.512	0.183	3.99e-24	5			Conserved hypothetical protein.
Os05g0156900	2.09e-21	0.770894	0.438	0.175	4.55e-17	5	Chalk5		Vacuolar H+-translocating pyrophosphatase, Regulation of grain chalkiness
Os02g0628900	7.03e-247	0.862077	0.52	0.01	1.53e-242	6			Conserved hypothetical protein.
Os10g0372100	1.78e-195	0.747044	0.463	0.011	3.87e-191	6			Conserved hypothetical protein.
Os08g0497600	3.51e-194	0.8812	0.488	0.014	7.63e-190	6	SRWD1, SRWD1, OsWD40-162	SALT RESPONSIVE WD40 PROTEIN 1, salt responsive WD40 protein 1	WD40 subfamily protein, Salt stress
Os01g0877400	4.09e-178	1.32397	0.455	0.014	8.88e-174	6			Similar to Avr9 elicitor response-like protein.
Os01g0167900	5.52e-173	0.750587	0.407	0.01	1.2e-168	6			KIP1-like domain containing protein.
Os02g0513100	1.74e-169	1.24616	0.577	0.03	3.79e-165	6	OsSWEET15	Sugars Will Eventually be Exported Transporter 15	Clade III SWEET transporter, Sucrose transporter, Regulation of sucrose transport in response to drought and salt stress, TAL effector-mediated susceptibility to bacterial pathogen
Os11g0156200	7.33e-168	0.707214	0.341	0.006	1.59e-163	6			Peptidase S28 family protein.
Os01g0191300	1.74e-154	1.09021	0.553	0.031	3.78e-150	6	OsNAC006		NAC transcription factor, Drought resistance
Os11g0508600	4.39e-154	1.36883	0.561	0.033	9.54e-150	6	11N3, OsSWEET14, Os11N3, Os-11N3, Xa41(t)	11N3, Xanthomonas oryzae pv. oryzae resistance 41	Sugar transporter, TAL effector-mediated susceptibility to bacterial pathogen
Os01g0236300	8.07e-150	1.08843	0.65	0.049	1.75e-145	6			Similar to Auxin response factor 18.
Os03g0197000	3.06e-142	0.640483	0.366	0.011	6.64e-138	6			Di-trans-poly-cis-decaprenylcistransferase-like domain containing protein.
Os01g0374000	2.91e-138	0.780598	0.488	0.026	6.32e-134	6			Similar to Glutathione S-transferase I (EC 2.5.1.18) (GST-I) (GST-29) (GST class- phi).
Os07g0607700	6.09e-137	0.763819	0.431	0.019	1.32e-132	6			Di-trans-poly-cis-decaprenylcistransferase family protein.
Os01g0168600	9.81e-134	0.795977	0.439	0.021	2.13e-129	6			Similar to predicted protein.
Os02g0285300	7.97e-121	0.620689	0.398	0.019	1.73e-116	6			DREPP plasma membrane polypeptide family protein.
Os09g0433800	8.12e-121	0.609466	0.276	0.006	1.77e-116	6			Similar to Senescence-associated protein SAG102.
Os06g0208200	2.07e-112	0.757465	0.439	0.027	4.5e-108	6			Conserved hypothetical protein.
Os09g0479900	1.3e-109	0.880184	0.439	0.028	2.81e-105	6			Similar to Subtilisin-like protease.
Os03g0223400	1.05e-107	1.58624	0.48	0.037	2.28e-103	6	GLN1;2, OsGLN1;2, GSr, RGS8, OsGS1;2, GS1;2, GS1	GLUTAMINE SYNTHETASE 1;2, cytosolic glutamine synthethase 1;2, cytosolic glutamine synthase 2, glutamine synthetase 1;2, glutamine synthetase 1	Cytosolic glutamine synthetase, Ammonium assimilation
Os05g0342000	1.43e-106	0.714294	0.374	0.02	3.11e-102	6			Hypothetical conserved gene.
Os01g0885300	6.3e-106	0.696784	0.415	0.025	1.37e-101	6			Conserved hypothetical protein.
Os03g0685300	3.38e-82	0.638617	0.439	0.04	7.34e-78	6			Glutamine amidotransferase class-I domain containing protein.
Os10g0465700	1.39e-79	1.17801	0.423	0.039	3.02e-75	6			Similar to Beta-amylase PCT-BMYI (EC 3.2.1.2).
Os08g0556900	1.29e-74	0.814028	0.439	0.046	2.81e-70	6			Similar to Cysteine proteinase (EC 3.4.22.-).
Os03g0367900	2.26e-74	0.598051	0.382	0.033	4.91e-70	6			Peptidase C15, pyroglutamyl peptidase I family protein.
Os04g0537900	5.96e-57	1.35461	0.707	0.185	1.3e-52	6	GLUP3, glup3(esp7), esp7, glup3, OsVPE1, VPE1, OsaLeg3	GLUTELIN PRECURSOR 3, glutelin precursor3, glutelin precursor 3, glutelin precursor-3, vacuolar processing enzyme 1, legumain 3	Seed-type vacuolar processing enzyme (VPE), Glutelin maturation
Os08g0258200	3.98e-44	1.1925	0.602	0.163	8.65e-40	6			Ankyrin domain containing protein.
Os07g0673400	6.24e-43	0.834083	0.488	0.101	1.36e-38	6	OsUSP1	universal stress protein 1	Homologue of the bacterial universal stress protein family, Adaptation to submergence stress, Ethylenemediated stress adaptation
Os05g0477900	4.65e-42	0.810762	0.48	0.1	1.01e-37	6			Similar to nonspecific lipid-transfer protein.
Os10g0213800	3.91e-41	0.731318	0.545	0.128	8.5e-37	6			Hypothetical conserved gene.
Os02g0664300	2.82e-39	0.853994	0.602	0.171	6.14e-35	6			Peptidase S8 and S53, subtilisin, kexin, sedolisin domain containing protein.
Os11g0621300	2.09e-35	1.34285	0.756	0.361	4.54e-31	6	OsGRDP1	glycine-rich domain protein 1	Glycine-rich domain (GRD)-containing protein, Regulation of cell death and disease resistance
Os06g0498800	2.73e-25	0.849064	0.545	0.191	5.93e-21	6	OsMFT1	MOTHER OF FT AND TFL1	Homolog of Arabidopsis MOTHER OF FT AND TFL1, Regulation of heading and panicle architecture
Os03g0750000	1.77e-20	0.868196	0.553	0.227	3.84e-16	6			Similar to ethylene-responsive protein.
Os05g0495300	1.09e-13	0.655831	0.846	0.569	2.36e-09	6			Conserved hypothetical protein.
Os09g0508250	1.95e-167	1.32422	0.342	0.004	4.23e-163	7			Similar to MTN3.
Os07g0634400	7.57e-156	1.428	0.513	0.016	1.65e-151	7			HAD-superfamily hydrolase, subfamily IA, variant 3 domain containing protein.
Os01g0948600	8.14e-156	1.6068	0.487	0.014	1.77e-151	7			Conserved hypothetical protein.
Os01g0169800	2.73e-130	0.645126	0.224	0.001	5.92e-126	7	FIB, fib	FISH BONE, fish bone	Tryptophan aminotransferase, Indole-3-acetic acid (IAA) biosynthesis
Os03g0147400	4.44e-119	2.02295	0.816	0.072	9.65e-115	7	Z3	zebra3	Putative citrate transporter, Citrate-metal hydrogen symport (CitMHS) family protein, Citrate transport and distribution during leaf development
Os08g0482700	1.71e-100	1.00512	0.487	0.026	3.72e-96	7			Cupredoxin domain containing protein.
Os06g0624900	3.87e-98	0.792864	0.316	0.009	8.42e-94	7			Similar to zinc-binding family protein.
Os01g0886200	4.26e-90	0.820835	0.368	0.016	9.26e-86	7			Similar to AGAMOUS homolog.
Os12g0207000	2.83e-75	0.612009	0.368	0.02	6.14e-71	7	OsMADS13	MADS-box transcription factor 13	Floral homeotic gene, Ortholog of Arabidopsis STK (SEEDSTICK), Specification of flower organ identity and meristem determinacy
Os05g0230700	1.59e-67	0.875721	0.447	0.036	3.46e-63	7			Similar to Auxin-responsive protein IAA17.
Os01g0778800	3.48e-53	0.753633	0.303	0.02	7.56e-49	7			Peptidase M16, core domain containing protein.
Os03g0762500	1.48e-46	0.655536	0.342	0.03	3.22e-42	7			Conserved hypothetical protein.
Os04g0413500	2.66e-46	0.855649	0.211	0.01	5.78e-42	7	GIF1, gif1, CIN2, OsCIN2, OsGIF1, WB1	GRAIN INCOMPLETE FILLING 1, grain incomplete filling 1, "Beta-fructofuranosidase, insoluble isoenzyme 2", Sucrose hydrolase 2, Invertase 2, Cell wall beta-fructosidase 2, cell-wall invertase 2, White Belly 1	Cell-wall invertase, Carbon partitioning during early grain filling, Regulation of endosperm development
Os09g0507200	4.77e-41	0.596349	0.342	0.035	1.04e-36	7	OsMADS8, OsMADS8/24, DTE9	MADS-domain transcription factor 8, dark tip embryo 9	MADS-box transcription factor 8, Floral organ determination, Seed germination, ABA signaling and catabolism, Hybrid weakness
Os05g0518600	1.03e-40	0.62193	0.276	0.022	2.25e-36	7	OsTPS1	trehalose-6-phosphate synthase 1	Trehalose-6-phosphate synthase, Abiotic stress tolerance
Os01g0679900	6.39e-39	0.66409	0.474	0.07	1.39e-34	7			Similar to Ythdf2-prov protein.
Os08g0535200	2.48e-38	1.81019	0.447	0.066	5.39e-34	7	Os8N3, OsSWEET11, xa13, xa13/Os8N3		Sugar transporter, A member of the MtN3 gene family, Host disease-susceptibility gene for bacterial blight
Os02g0216300	3.2e-38	0.633783	0.237	0.017	6.96e-34	7			Similar to cDNA clone:J023088C01, full insert sequence.
Os07g0209100	8.75e-37	0.781102	0.184	0.01	1.9e-32	7			Similar to Seed imbibition protein (Fragment).
Os05g0584600	2.83e-34	1.34672	0.658	0.174	6.14e-30	7			ATPase, AAA-type, core domain containing protein.
Os02g0735200	1.73e-33	0.650351	0.355	0.046	3.77e-29	7	OsGS1;1	cytosolic glutamine synthetase 1;1	Cytosolic glutamine synthetase, Growth rate, Grain filling
Os01g0550300	1.35e-27	0.660127	0.434	0.081	2.93e-23	7			Similar to Gda-1 protein.
Os08g0441500	5.58e-21	0.580153	0.211	0.026	1.21e-16	7	OsCCR, CCR, OsCCR14, OsCCR20	cinnamoyl-CoA reductase	Cinnamoyl-CoA reductase, Lignin formation
Os07g0661400	5.36e-19	0.739403	0.513	0.15	1.16e-14	7			Conserved hypothetical protein.
Os01g0709500	1.28e-18	0.654117	0.447	0.121	2.77e-14	7			Similar to Serine/threonine-protein kinase PBS1 (EC 2.7.1.37) (AvrPphB susceptible protein 1).
Os03g0353400	2.01e-18	1.12405	0.671	0.294	4.38e-14	7			Similar to Poly(A)-binding protein C-terminal interacting protein 6.
Os03g0142800	6.36e-18	0.725873	0.395	0.1	1.38e-13	7	OsMRP5	multidrug resistance-associated protein 5	Multidrug resistance-associated protein (MRP) ATP-binding cassette (ABC) transporter, Rice orthologue of the maize Lpa1 gene, Phytic acid metabolism
Os04g0119500	3.9e-17	0.910092	0.526	0.179	8.47e-13	7			Similar to Membrane related protein-like.
Os03g0227800	1.03e-12	1.13606	0.921	0.765	2.23e-08	7			Conserved hypothetical protein.
Os06g0194900	8.98e-09	0.61454	0.395	0.165	0.000195164	7			Similar to Sucrose synthase 2.
Os05g0495300	9.12e-09	0.737229	0.763	0.575	0.00019813	7			Conserved hypothetical protein.
Os08g0268000	5.48e-07	0.589259	0.197	0.061	0.0119143	7			Conserved hypothetical protein.
Os05g0111300	7.15e-05	0.640497	0.197	0.079	1	7	OsMT2b	METALLOTHIONEIN2b	Metallothionein, Reactive oxygen species (ROS) scavenger protein, Root development and seed embryo germination, Distribution of Zn to grain
Os10g0340600	1.5e-219	1.05901	0.519	0.006	3.27e-215	8			Similar to Beta-galactosidase.
Os02g0170300	2.77e-199	0.934681	0.462	0.005	6.02e-195	8	MADS29, OsMADS29	MADS BOX GENE 29, MADS box gene29, MADS-box transcription factor 29	MADS box transcription factor, Regulator of early seed development
Os01g0177900	1.98e-193	1.38654	0.808	0.026	4.3e-189	8	PDR6, OsPDR6, OsABCG31, OsABCG31_1	PLEIOTROPIC DRUG RESISTANCE 6, sativa pleiotropic drug resistance 6, Pleiotropic drug resistance protein 6, ABC transporter superfamily ABCG subgroup member 31	ATP-binding cassette transporter, Cuticle formation, Defense response
Os04g0465600	2.81e-192	2.45405	0.923	0.037	6.12e-188	8			Bet v I allergen family protein.
Os05g0356700	1.94e-169	0.882487	0.519	0.01	4.22e-165	8			Protein of unknown function DUF231, plant domain containing protein.
Os10g0478500	3.86e-162	0.796444	0.442	0.007	8.39e-158	8			MATH domain containing protein.
Os01g0151700	4.75e-156	0.808737	0.481	0.009	1.03e-151	8			Similar to Short-chain dehydrogenase Tic32.
Os10g0150800	1.34e-147	1.04903	0.519	0.012	2.91e-143	8			Protein of unknown function DUF1210 family protein.
Os11g0210100	1.51e-141	0.795574	0.423	0.008	3.29e-137	8			Similar to Class III peroxidase 133.
Os10g0463200	2.93e-138	1.62762	0.577	0.018	6.37e-134	8			Esterase, SGNH hydrolase-type domain containing protein.
Os06g0132500	2.15e-105	0.589823	0.346	0.007	4.68e-101	8	OsBDG	BODYGUARD	Control of wax biosynthesis
Os10g0148100	5.39e-101	1.26042	0.615	0.032	1.17e-96	8	OsPRP3	Proline-Rich Protein 3	Flower specific proline-rich protein, Determination of extracellular matrix structure of floral organs, Cold tolerance
Os06g0148200	1.08e-89	0.694999	0.327	0.008	2.34e-85	8			Lipase, GDSL domain containing protein.
Os09g0323500	6.25e-88	0.708406	0.346	0.01	1.36e-83	8			Protein of unknown function DUF833 family protein.
Os06g0496800	1.37e-85	0.598453	0.385	0.013	2.97e-81	8	MAK6	Membrane-associated kinase-6	Membrane-associated kinase-6, Response to submergence
Os06g0156700	4.95e-71	1.71159	0.5	0.032	1.07e-66	8	OsGLIP2	GDSL lipase 2	GDSL lipase, Negative regulation of disease resistance
Os06g0553200	5.94e-61	1.57079	0.654	0.068	1.29e-56	8			Similar to Meiosis 5.
Os09g0484200	2.37e-48	1.17861	0.577	0.065	5.16e-44	8			Hypothetical protein.
Os03g0808500	3.43e-48	0.785391	0.423	0.033	7.46e-44	8			Plant lipid transfer protein/Par allergen family protein.
Os02g0809500	9.82e-44	0.743023	0.481	0.047	2.13e-39	8	OsSEC24		Functional SEC24-like protein, Coat protein, Tolerance to iron deficiency and high pH by enhancing H<sup>+</sup>secretion
Os08g0535200	3.37e-40	1.46581	0.538	0.067	7.32e-36	8	Os8N3, OsSWEET11, xa13, xa13/Os8N3		Sugar transporter, A member of the MtN3 gene family, Host disease-susceptibility gene for bacterial blight
Os01g0598600	3.38e-38	0.766516	0.442	0.046	7.35e-34	8			Peptidase A1 domain containing protein.
Os04g0460600	1.13e-36	0.681596	0.365	0.032	2.46e-32	8	NAC2, OsNAC2, ONAC004, ONAC4, ONAC034, ONAC34, ONAC058, ONAC58, OMTN2, Ostil1, OsNAC2/ONAC004, OsORE1.2	NAC DOMAIN-CONTAINING PROTEIN 2, NAC domain-containing protein 004, NAC domain-containing protein 4, NAC domain-containing protein 34, NAC domain-containing protein 58, miR164-targeted NAC2, Oryza miR164-targeted NAC2, Oryza sativa tillering1, ORESARA 1.2	NAC transcription factor, Regulation of shoot branching, plant height and flowering time
Os01g0681900	1.1e-27	1.1657	0.615	0.129	2.39e-23	8	OsGOGAT1, NADH-GOGAT1	Glutamate synthetase 1, NADH-dependent glutamate synthase1	Glutamate synthetase, Primary ammonium ions assimilation in seedling roots, Development of tillers, Tolerance to nitrogen-limitation
Os04g0614650	1.33e-25	1.1608	0.692	0.171	2.9e-21	8			Similar to OSIGBa0126B18.8 protein.
Os02g0626400	1.06e-18	0.86619	0.462	0.1	2.3e-14	8			Phenylalanine ammonia-lyase (EC 4.3.1.5).
Os08g0189100	3.23e-18	1.27993	0.615	0.184	7.02e-14	8	GLP8-2, OsGLP8-2, GER3, OsGER3, GLP16, OsEnS-117	GERMIN-LIKE PROTEIN 8-2, Germin-like protein 8-2, Germin-like protein 3, Germin-like protein 16, endosperm-specific gene 117	Germin-like protein 8-2, Disease resistance
Os03g0685300	7.52e-17	0.621823	0.308	0.051	1.63e-12	8			Glutamine amidotransferase class-I domain containing protein.
Os11g0545300	1.1e-15	0.942971	0.442	0.107	2.39e-11	8	OsSpo11-5		Homologue of the archaeal topoisomerase VIA
Os03g0227800	1.08e-08	0.875568	0.904	0.766	0.000233598	8			Similar to cDNA clone:001-004-G07, full insert sequence.
Os04g0560700	1.47e-07	0.914601	0.192	0.044	0.00319715	8			Conserved hypothetical protein.
Os05g0495300	3.53e-06	0.634355	0.846	0.575	0.0767278	8			Conserved hypothetical protein.
1 p-value, using a Wilcoxon Rank Sum test in each expressed genes pairs between two groups of cells.
2 log fold-chage of the average expression between the two groups. Positive values indicate that the gene is more highly expressed in the first group.
3 The percentage of cells where the gene is detected in the first group.
4 The percentage of cells where the gene is detected in the second group.
5 Adjusted p-value, based on bonferroni correction using all genes in the dataset.

## Sheet: Table S2B
Table S2B. Cluster-specific genes in rice seed
gene	p_val 1	avg_log2FC 2	pct.1 3	pct.2 4	p_val_adj 5	cluster	Symbol	Name	Description	PMID
Os08g0290700	4.21e-37	0.277204	0.194	0.051	9.15e-33	0			Winged helix repressor DNA-binding domain containing protein.
Os07g0296900	1.11e-82	0.508923	0.395	0.087	2.42e-78	1	MEG2	Maternally Expressed Gene2	Regulation of nutrient metabolism and endosperm development	28295376
Os01g0667700	3.24e-71	0.644485	0.354	0.084	7.04e-67	1			Zinc finger, RING/FYVE/PHD-type domain containing protein.
Os01g0309900	1.24e-67	0.384756	0.301	0.058	2.7e-63	1			Lipase, class 3 family protein.
Os09g0502100	3.07e-65	0.536244	0.285	0.057	6.67e-61	1	LGD1, LGD1.1	LAGGING GROWTH AND DEVELOPMENT 1	Von Willebrand factor type A (VWA) domain containing protein, RNA binding protein, Regulation of vegetative growth and development	22409537
Os12g0239200	5.26e-64	0.529646	0.301	0.064	1.14e-59	1			Conserved hypothetical protein.
Os08g0497300	9.41e-59	0.349092	0.268	0.053	2.04e-54	1			Cellular retinaldehyde binding/alpha-tocopherol transport family protein.
Os09g0419100	4.73e-56	0.381778	0.245	0.046	1.03e-51	1			Hypothetical protein.
Os07g0607400	9.81e-56	0.317519	0.239	0.044	2.13e-51	1			Pectin lyase fold/virulence factor domain containing protein.
Os06g0573600	1.79e-51	0.529014	0.318	0.087	3.9e-47	1	OsBGal2	beta-galactosidase 2, &beta;-galactosidase 2	Beta-galactosidase	DOI:10.1016/j.plantsci.2007.04.009
Os06g0527800	1.91e-48	0.470139	0.301	0.083	4.15e-44	1	OsPYL/RCAR7	PYRABACTIN RESISTANCE 1 LIKE/REGULATORY COMPONENTS OF ABA RECEPTOR 7	ABA receptor, Drought tolerance	32545174
Os12g0612400	7.58e-48	0.355744	0.295	0.08	1.65e-43	1			Similar to S-locus protein 5 (Fragment).
Os01g0265200	2.66e-46	0.514845	0.282	0.077	5.78e-42	1	OsPAPST1	3'-Phosphoadenosine 5'-Phosphosulfate Transporter1	Mitochondrial carrier protein, Early leaf development	23411694
Os01g0911300	6.26e-42	0.276488	0.234	0.056	1.36e-37	1			Similar to Transporter associated with antigen processing-like protein.
Os02g0173100	7.09e-41	0.330818	0.276	0.08	1.54e-36	1			Similar to cytochrome P450.
Os03g0331700	1.3e-39	0.383586	0.224	0.056	2.81e-35	1			Similar to cDNA clone:002-120-A09, full insert sequence.
Os01g0102400	5.97e-38	0.30775	0.284	0.089	1.3e-33	1			Histone-fold domain containing protein.
Os01g0252100	5.71e-37	0.289663	0.289	0.093	1.24e-32	1			Similar to Glycogen synthase kinase-3 homolog MsK-3 (EC 2.7.1.-).
Os08g0296900	2.43e-36	0.262071	0.23	0.061	5.28e-32	1			Tetratricopeptide-like helical domain containing protein.
Os02g0616600	1.28e-35	0.386424	0.22	0.058	2.79e-31	1			Hypothetical protein.
Os05g0102600	2.64e-32	0.32417	0.245	0.077	5.74e-28	1			Zinc finger, RING/FYVE/PHD-type domain containing protein.
Os08g0321000	1.08e-29	0.274725	0.251	0.085	2.34e-25	1			FAS1 domain domain containing protein.
Os02g0793900	2.51e-29	0.264229	0.222	0.069	5.45e-25	1	HDR1	HEADING DATE REPRESSOR 1, Heading Date Repressor1, Heading Date Repressor 1	Ubiquitous nuclear protein, Regulation of photoperiodic flowering	26954091
Os01g0231500	1.88e-28	0.268486	0.232	0.077	4.09e-24	1			Similar to Casein kinase I (Fragment).
Os07g0160100	2.78e-204	0.986693	0.485	0.024	6.04e-200	2	YAB1, OsYAB1, FIL1, osFIL1	YABBY1, YABBY1 gene, YABBY 1, OsYABBY1, , Os YABBY1, FILAMENTOUS FLOWER 1, Protein YABBY 1, Protein FILAMENTOUS FLOWER 1, FIL homolog 1	YABBY family transcription factor, Stamen and carpel development, Feedback regulation of gibberellin biosynthesis	17369428, 17216490, 15604733
Os12g0621100	1.56e-184	0.756915	0.443	0.022	3.38e-180	2			Similar to Filamentous flower-like yabby protein (Fragment).
Os03g0147400	2.18e-164	0.979489	0.545	0.049	4.73e-160	2	Z3	zebra3	Putative citrate transporter, Citrate-metal hydrogen symport (CitMHS) family protein, Citrate transport and distribution during leaf development	29305728
Os03g0861100	3.8e-146	0.738782	0.439	0.034	8.26e-142	2			Conserved hypothetical protein.
Os03g0602300	8.54e-129	0.602104	0.337	0.019	1.85e-124	2	OsBRD1, OsDWARF	BR-deficient dwarf1	C6-oxidase, Brassinosteroid biosynthetic enzyme, Brassinosteroid biosynthesis, Organization and elongation of the leaf and stem cells, Regulation of root growth	31871071, 12445121
Os06g0336200	4.78e-123	0.666255	0.367	0.027	1.04e-118	2			Delta-tonoplast intrinsic protein.
Os05g0227600	1.09e-119	0.658362	0.322	0.02	2.36e-115	2	OsRePRP1.2	REPETITIVE PROLINE-RICH PROTEIN 1.2	Proline-rich glycoprotein, ABA-dependent inhibition of root growth	23886623
Os03g0363600	3.91e-115	0.380434	0.231	0.006	8.5e-111	2			Similar to Sugar transporter-like protein.
Os09g0425900	2.96e-111	0.546616	0.307	0.019	6.44e-107	2			Similar to senescence-associated protein DH.
Os02g0131100	1.21e-107	0.520238	0.284	0.017	2.62e-103	2			Hypothetical conserved gene.
Os12g0421000	5.32e-106	0.510168	0.307	0.021	1.16e-101	2			Similar to Barley stem rust resistance protein.
Os02g0734300	1.01e-104	0.54798	0.307	0.022	2.19e-100	2			Similar to Nudix hydrolase 18, mitochondrial precursor (EC 3.6.1.-) (AtNUDT18).
Os03g0203200	7.78e-103	0.515345	0.307	0.022	1.69e-98	2	D14, d14(d10), dwf13, d10, d14, D88, HTD2, OsD14, qPPB3, D88/D14	DWARF KAMIKAWABUNWAI TILLERING, kamikawabunwai tillering dwarf, dwarf-14, DWARF14, dwarf 14, Dwarf 88, HIGH-TILLERING DWARF 2, Primary panicle branch number 3	Alpha/beta hydrolase, Strigolactone receptor, Strigolactone perception, Reguration of shoot branching	24616269, 19542179
Os08g0435900	1.98e-102	0.424656	0.216	0.007	4.3e-98	2	Lhca4, DYE1	light-harvesting complex subunit a4, delayed yellowing1	Subunit of the light-harvesting complex I (LHCI)	29304198
Os07g0677300	8.1e-102	0.615552	0.231	0.009	1.76e-97	2			Peroxidase.
Os03g0103300	3.62e-99	1.05321	0.424	0.056	7.86e-95	2	qLTG-3-1(t), qLTG-3-1(t), qLTG3-1, OsHyPRP05, OsHyPRP5, HyP/GRP05, HyP/GRP5	low-temperature germianability (QTL)-3-1(t), hybrid proline- or glycine-rich protein 5	Hybrid proline- or glycine-rich protein, Controll of low-temperature germinability, Pre-harvest sprouting resistance	18719107, 20145904, 20960223, 25309566
Os03g0856000	5.05e-97	0.288915	0.182	0.004	1.1e-92	2			2OG-Fe(II) oxygenase domain containing protein.
Os12g0188700	1.42e-92	0.323173	0.186	0.005	3.09e-88	2	OsTrxm	Thioredoxin m-type	Thioredoxin m-type isoform, Redox regulation of chloroplast target proteins, Antifungal protein	31795318, 18723667
Os02g0703600	5.56e-92	0.597386	0.295	0.024	1.21e-87	2	OsABA8ox1, CYP707A5	ABA 8'-hydroxylase 1	ABA 8'-hydroxylase, Response to submergence	17205969
Os06g0320500	1.43e-88	0.327046	0.174	0.005	3.11e-84	2			Similar to Light-harvesting complex I (Fragment).
Os07g0684800	1.69e-88	0.347695	0.189	0.006	3.67e-84	2			Similar to NAM / CUC2-like protein.
Os03g0261100	3.49e-85	0.32658	0.174	0.005	7.58e-81	2	PLA2-II	phospholipase A2-II	Low-molecular-weight calcium-dependent phospholipase A2	10608658, 10673040
Os07g0558400	1.25e-83	0.300814	0.174	0.006	2.72e-79	2			Similar to Chlorophyll a/b-binding protein CP29 precursor.
Os03g0742300	4.83e-83	0.458012	0.231	0.015	1.05e-78	2			Signal transduction response regulator, receiver region domain containing protein.
Os04g0403701	2.48e-81	0.436377	0.307	0.032	5.4e-77	2			Similar to protein phosphatase 2C containing protein.
Os03g0592500	6.73e-80	0.394174	0.205	0.011	1.46e-75	2			Similar to Photosystem II type II chlorophyll a/b binding protein (Fragment).
Os04g0414700	5.65e-79	0.428227	0.178	0.007	1.23e-74	2			Photosystem I PsaO domain containing protein.
Os05g0363500	8.16e-79	0.528405	0.288	0.029	1.77e-74	2			Hypothetical conserved gene.
Os03g0183800	2.78e-78	0.55627	0.367	0.052	6.03e-74	2			Similar to Leucine-rich repeat transmembrane protein kinase 1 (Fragment).
Os06g0697000	3.34e-77	0.518802	0.28	0.028	7.26e-73	2			Similar to Xyloglucan endo-transglucosylase/hydrolase 1.
Os07g0181500	6.34e-77	0.30934	0.182	0.008	1.38e-72	2			Protein of unknown function DUF506, plant family protein.
Os05g0366600	3.6e-76	0.279337	0.174	0.007	7.83e-72	2			Similar to Hydroxyisourate hydrolase.
Os03g0237600	1.88e-75	0.595276	0.318	0.039	4.09e-71	2			Similar to ATMAP65-6; microtubule binding.
Os02g0640800	2.15e-75	0.435164	0.17	0.007	4.67e-71	2			Similar to Carbonyl reductase 1.
Os10g0555900	3.05e-75	0.553338	0.292	0.032	6.62e-71	2	OsEXPB3	&beta;-Expansin 3, beta-expansin 3	Beta-expansin 3	16258250
Os05g0548900	4.72e-75	0.660509	0.292	0.032	1.02e-70	2			Similar to Phosphoethanolamine methyltransferase.
Os02g0584800	7.86e-75	0.372087	0.174	0.007	1.71e-70	2			Heavy metal transport/detoxification protein domain containing protein.
Os11g0242800	8.36e-75	0.413301	0.178	0.008	1.82e-70	2	LHCB5	light-harvesting complex II protein LHCB5	Light-harvesting complex II protein, Light-dependent rice blast resistance	31405986
Os11g0545300	5.77e-74	0.769143	0.443	0.084	1.25e-69	2	OsSpo11-5		Homologue of the archaeal topoisomerase VIA	21637817
Os02g0197600	1.36e-73	0.339159	0.178	0.008	2.94e-69	2			Chlorophyll a/b-binding protein type III (Fragment).
Os02g0611800	3.03e-72	0.392633	0.227	0.018	6.59e-68	2			Similar to Hydroxyanthranilate hydroxycinnamoyltransferase 3.
Os08g0205800	1.74e-71	0.528447	0.33	0.044	3.78e-67	2			Hypothetical conserved gene.
Os01g0501800	6.4e-71	0.421604	0.205	0.014	1.39e-66	2			Similar to Photosystem II oxygen-evolving complex protein 1 (Fragment).
Os02g0626400	1.57e-69	0.651825	0.417	0.079	3.41e-65	2			Phenylalanine ammonia-lyase (EC 4.3.1.5).
Os05g0202500	5.83e-69	0.484987	0.254	0.026	1.27e-64	2			Conserved hypothetical protein.
Os02g0232500	1.84e-67	0.365628	0.197	0.014	3.99e-63	2			Similar to Receptor-like serine/threonine kinase.
Os12g0292400	4.85e-67	0.354207	0.14	0.005	1.05e-62	2			Similar to Petunia ribulose 1, 5-bisphosphate carboxylase small subunit mRNA (clone pSSU 51), partial cds. (Fragment).
Os03g0650000	1.48e-65	0.259387	0.182	0.011	3.22e-61	2	OsSh1, OsYAB2	Shattering1, OsYABBY2	YABBY transcription factor, Control of seed shattering	22581231, 17216490
Os03g0345300	4.58e-65	0.34288	0.216	0.019	9.96e-61	2			Similar to Desiccation-related protein Lb_13-62 (Fragment).
Os05g0408900	4.67e-65	0.276258	0.155	0.007	1.01e-60	2			Similar to 1-deoxy-D-xylulose-5-phosphate synthase.
Os03g0749300	1.48e-64	0.400471	0.261	0.03	3.22e-60	2			Similar to Exoglucanase precursor.
Os08g0531700	2.21e-64	0.416632	0.265	0.031	4.8e-60	2	OsMADS7	MADS-box transcription factor 7	MADS-box transcription factor, Regulation of floral identity, Regulation of amylose content at high temperature	28429576, 20003164
Os01g0908301	2.74e-63	0.267913	0.17	0.01	5.95e-59	2			Non-protein coding transcript.
Os09g0346500	5.06e-62	0.537447	0.22	0.021	1.1e-57	2	CAB1R	chlorophyll a/b binding protein 1R	Chlorophyll a/b binding protein, Circadian clock-controlled gene	11489174
Os07g0529600	2.63e-61	0.336377	0.155	0.008	5.71e-57	2	OsDR8, OsXNP	defense-responsive gene 8, XopN<sub>KXO85</sub> binding protein	Thiamine synthase, Thiamine accumulation, Bacterial blight resistance, Blast resistance	24019919, 16514565
Os01g0739500	7.56e-59	0.46709	0.205	0.019	1.64e-54	2			Conserved hypothetical protein.
Os01g0859200	3.96e-58	0.32132	0.163	0.01	8.61e-54	2			Alpha/beta hydrolase fold-1 domain containing protein.
Os05g0203800	1.34e-55	0.286187	0.163	0.011	2.92e-51	2	MADS58, OsMADS58	MADS BOX GENE 58, MADS box gene58, MADS box gene 58, MADS-box transcription factor 58	Transcription factor, Floral organ development	16326928
Os02g0729700	4.67e-54	0.327513	0.235	0.029	1.02e-49	2			Similar to HAHB-7 (Fragment).
Os12g0189300	5.26e-54	0.40414	0.133	0.006	1.14e-49	2			Pyruvate/Phosphoenolpyruvate kinase, catalytic core domain containing protein.
Os01g0679900	4.16e-52	0.44019	0.318	0.058	9.04e-48	2			Similar to Ythdf2-prov protein.
Os11g0707000	5.88e-52	0.350624	0.159	0.012	1.28e-47	2			Similar to Ribulose bisphosphate carboxylase/oxygenase activase, chloroplastic.
Os01g0200700	1.34e-51	0.614669	0.402	0.096	2.9e-47	2	OsMT-3a	MT-like type 3, metallothionein-like type 3	Metallothionein-like protein, Tolerance to salinity and heavy metal stresses, Abiotic stress response	32253631, DOI:10.1016/j.envexpbot.2017.12.002
Os09g0507200	4.52e-51	0.327061	0.22	0.027	9.82e-47	2	OsMADS8, OsMADS8/24, DTE9	MADS-domain transcription factor 8, dark tip embryo 9	MADS-box transcription factor 8, Floral organ determination, Seed germination, ABA signaling and catabolism, Hybrid weakness	35069634, 19561057
Os01g0799500	2.36e-50	0.26455	0.17	0.015	5.13e-46	2			Methyladenine glycosylase domain containing protein.
Os05g0397300	2.75e-50	0.290891	0.193	0.02	5.99e-46	2			Conserved hypothetical protein.
Os01g0773700	4.44e-50	0.252192	0.148	0.01	9.65e-46	2			Similar to Photosystem II reaction center W protein (PSII 6.1 kDa protein) (Fragment).
Os08g0104600	9.06e-50	0.314988	0.163	0.014	1.97e-45	2	OsFd1	ferredoxin 1	Ferredoxin1, Photosynthetic electron transport and carbon assimilation	32603511
Os12g0566700	3.53e-48	0.264746	0.186	0.019	7.68e-44	2			Lipase, GDSL domain containing protein.
Os12g0147800	3.94e-48	0.254871	0.144	0.01	8.55e-44	2	OsPSK5, PSK5	phytosulfokine 5	Phytosulphokine precursor, osa-miR164c target gene, Regulation of seed vigor	30791202
Os01g0600900	2.27e-46	0.363755	0.163	0.015	4.92e-42	2			Chlorophyll a-b binding protein 2, chloroplast precursor (LHCII type I CAB-2) (LHCP).
Os06g0608700	7.73e-46	0.294086	0.152	0.013	1.68e-41	2	OsAld-Y, YGDL-1, YGDL1	YELLOW GREEN AND DROOPY LEAF-1, "fructose-1, 6-bisphosphate aldolase Y", yellow green and droopy leaf-1	Fructose-1, 6-bisphosphate aldolase (EC:4.1.2.13), Chlorophyll biosynthesis, Chloroplast development, Sugar metabolism	27457997
Os03g0764600	2.08e-44	0.285088	0.208	0.028	4.53e-40	2			Homeodomain-like containing protein.
Os04g0460600	2.2e-44	0.332496	0.193	0.024	4.77e-40	2	NAC2, OsNAC2, ONAC004, ONAC4, ONAC034, ONAC34, ONAC058, ONAC58, OMTN2, Ostil1, OsNAC2/ONAC004, OsORE1.2	NAC DOMAIN-CONTAINING PROTEIN 2, NAC domain-containing protein 004, NAC domain-containing protein 4, NAC domain-containing protein 34, NAC domain-containing protein 58, miR164-targeted NAC2, Oryza miR164-targeted NAC2, Oryza sativa tillering1, ORESARA 1.2	NAC transcription factor, Regulation of shoot branching, plant height and flowering time	25754802, 17888111
Os01g0270300	3.18e-43	0.378888	0.25	0.043	6.91e-39	2			Similar to Cationic peroxidase isozyme 40K precursor.
Os08g0157500	6.03e-43	0.279199	0.186	0.023	1.31e-38	2	ROMT9, COMT, OsCOMT, ROMT-9, OsCOMT1, OsCAldOMT1, CAldOMT1, OsOMT	O-METHYLTRANSFERASE 9, Quercetin 3-O-methyltransferase 1, Flavonol 3-O-methyltransferase 1, caffeic acid 3-O-methyltransferase, caffeic acid O-methyltransferase 1, 5-hydroxyconiferaldehyde O-methyltransferase 1, 5-hydroxyconiferaldehyde OMT1, 5-HCAld OMT1	Caffeic acid O-methyltransferase, Flavonoid 3'-O-methyltransferase, Melatonin biosynthesis, Tricin biosynthesis	26276868, 26082402, 16412485
Os06g0580100	6.98e-43	0.253848	0.133	0.01	1.52e-38	2			Similar to cDNA clone:006-306-H07, full insert sequence.
Os04g0624600	1.04e-42	0.303577	0.231	0.037	2.27e-38	2	SSIIIB, OsSSIIIb. SSIII-1	SOLUBLE STARCH SYNTHASE IIIB	Starch synthase, Starch biosynthesis	15232694, 15642712, 21595523
Os03g0311300	2.56e-41	0.391074	0.212	0.032	5.56e-37	2			Similar to HAD-superfamily hydrolase, subfamily IA, variant 3 containing protein, expressed.
Os03g0687000	2.74e-40	0.448308	0.337	0.084	5.96e-36	2	OsNPF2.4, NPF2.4, OsPTR2, PTR2	NRT1/PTR family 2.4, NO3-/peptide transporter family 2.4	Nitrate transporter, Peptide transporter, osa-miR168a target gene, Acquisition and long-distance transport of nitrate, Regulation of seed vigor	30791202, 25332358
Os04g0457000	7.84e-40	0.262627	0.121	0.009	1.7e-35	2			Similar to Chlorophyll a/b-binding protein CP24, photosystem II (Fragment).
Os12g0291100	1.17e-39	0.375318	0.197	0.029	2.55e-35	2			Similar to Petunia ribulose 1, 5-bisphosphate carboxylase small subunit mRNA (clone pSSU 51), partial cds. (Fragment).
Os03g0638200	1.5e-38	0.281299	0.186	0.026	3.25e-34	2			Similar to Major facilitator superfamily protein, expressed.
Os02g0806300	2.12e-37	0.330736	0.223	0.04	4.6e-33	2			Hypothetical protein.
Os11g0171300	3.96e-37	0.293864	0.144	0.016	8.61e-33	2			Fructose-bisphosphate aldolase, chloroplast precursor (EC 4.1.2.13) (ALDP).
Os11g0147800	2.4e-36	0.354298	0.239	0.047	5.22e-32	2			Similar to Wali7 protein (Fragment).
Os04g0560700	7.18e-36	0.397885	0.201	0.033	1.56e-31	2			Conserved hypothetical protein.
Os01g0239200	1.88e-35	0.251547	0.148	0.018	4.09e-31	2			Similar to Phophate translocator (Fragment).
Os01g0717000	2.51e-35	0.46763	0.292	0.07	5.46e-31	2			Similar to GmCK1p (EC 2.7.1.32).
Os04g0531900	2.26e-33	0.262627	0.11	0.009	4.91e-29	2			Short-chain dehydrogenase/reductase SDR domain containing protein.
Os04g0559200	5.83e-33	0.258825	0.208	0.039	1.27e-28	2			Protein of unknown function DUF3741 domain containing protein.
Os02g0735200	7.88e-33	0.278725	0.212	0.04	1.71e-28	2	OsGS1;1	cytosolic glutamine synthetase 1;1	Cytosolic glutamine synthetase, Growth rate, Grain filling	24743556, 15918879
Os07g0437500	1.09e-32	0.325985	0.201	0.037	2.37e-28	2	TDC2	TRYPTOPHAN DECARBOXYLASE 2, Trp decarboxylase 2	Aromatic L-amino acid decarboxylase (AADC), Serotonin biosynthesis	17763868, 19439571
Os04g0244800	6.5e-32	0.366155	0.261	0.062	1.41e-27	2			Heavy metal transport/detoxification protein domain containing protein.
Os12g0623900	1.34e-31	0.39064	0.303	0.083	2.91e-27	2			Similar to Ethylene-responsive methionine synthase (Fragment).
Os01g0550300	2.34e-31	0.351039	0.284	0.073	5.08e-27	2			Similar to Gda-1 protein.
Os03g0121200	3.33e-31	0.373981	0.239	0.054	7.23e-27	2			Similar to Class III peroxidase 33.
Os04g0656100	5.58e-31	0.258595	0.186	0.033	1.21e-26	2	AHA7, OSA7, OsA7, osAHA7, AHA7, PAA-Hwa	H+-ATPASE 7, plasma membrane H+-ATPase 7, PM H+-ATPase 7, plasma membrane H+ P-Type ATPase 7, panicle apical abortion-h	H+-ATPase, Blue light-induced stomatal opening of dumbbell-shaped guard cells, N uptake	27048369, 21421368
Os03g0766800	1.07e-29	0.261215	0.144	0.02	2.32e-25	2			Conserved hypothetical protein.
Os07g0139400	2.87e-29	0.324424	0.273	0.072	6.24e-25	2			NAD(P)-binding domain containing protein.
Os08g0205900	4.16e-29	0.258595	0.182	0.034	9.03e-25	2			Similar to Viroid RNA-binding protein (Fragment).
Os11g0671000	4.39e-28	0.302782	0.235	0.056	9.54e-24	2			Similar to Dormancy-associated protein.
Os02g0216300	5.87e-28	0.288651	0.117	0.014	1.28e-23	2			Similar to cDNA clone:J023088C01, full insert sequence.
Os07g0622200	8.14e-28	0.376631	0.22	0.051	1.77e-23	2	OsDAHP1, DAHP1, DAHPS, OsDAHPS2, DAHPS2	phospho-2-dehydro-3-deoxyheptonate aldolase, 3-deoxy-D-arabinoheptulosonate 7-phosphate synthase, 3-deoxy-D-arabino-heptulosonate 7-phosphate synthase 2	3-Deoxy-D-arabino-heptulosonate 7-phosphate synthase, Chorismate biosynthesis	16496151
Os02g0469300	4.75e-27	0.268692	0.22	0.051	1.03e-22	2			Similar to OSIGBa0148D14.7 protein.
Os04g0461600	1.35e-26	0.272381	0.125	0.017	2.94e-22	2			Similar to Fw2.2.
Os01g0734200	1.37e-26	0.263079	0.186	0.038	2.99e-22	2	OsRbohA, OsNOX2	respiratory burst oxidase homologue A, NADPH oxidase 2	Plasma membrane NADPH oxidase, Developmental regulation, Drought-stress response	27465023, 26400148, 8811865
Os10g0465700	8.45e-25	0.396968	0.189	0.042	1.84e-20	2			Similar to Beta-amylase PCT-BMYI (EC 3.2.1.2).
Os03g0299600	1.84e-24	0.263778	0.163	0.032	3.99e-20	2			Wound-induced protein, Wun1 domain containing protein.
Os10g0512800	3.29e-24	0.293525	0.205	0.05	7.14e-20	2	KLP	kinesin-like protein	Kinesin-like protein, Resistance to sheath blight disease	34215911
OsPTpsbA	5.84e-24	0.502641	0.261	0.08	1.27e-19	2	NA	NA	NA	NA
Os02g0752701	2.32e-23	0.288152	0.182	0.041	5.05e-19	2			Conserved hypothetical protein.
Os09g0524800	3.76e-23	0.344263	0.28	0.091	8.17e-19	2	OsBAG1	Bcl-2-associated athanogene 1	Bcl-2-associated athanogene (BAG) protein, BAG protein containing a ubiquitin-like (UBL) structure, Plant development	34685978
Os12g0284000	9.35e-22	0.289859	0.284	0.094	2.03e-17	2			Regulator of chromosome condensation, RCC1 domain containing protein.
Os03g0152000	2.74e-21	0.331248	0.246	0.077	5.95e-17	2			Heavy metal transport/detoxification protein domain containing protein.
Os08g0504700	6.56e-20	0.276103	0.235	0.073	1.42e-15	2	SAP11, OsDOG, OsSAP11	STRESS ASSOCIATED PROTEIN GENE 11, Oryza sativa dwarf rice with overexpression of gibberellin-induced gene, dwarf rice with overexpression of gibberellin-induced gene, stress associated protein 11	Gibberellin-induced A20/AN1 zinc-finger protein, Negative regulation of GA (gibberellin) -mediated cell elongation	21316795
Os04g0584600	6.57e-19	0.336812	0.261	0.093	1.43e-14	2	CDPK13	calcium dependent protein kinase 13	Group I calcium-dependent protein kinase, Cold and salt/drought tolerance, Activation of NADPH oxidase (RBOHH) in rice root during aerenchyma formation	28351990, 10929125
Os03g0292100	1.09e-17	0.26553	0.258	0.093	2.38e-13	2			Hypothetical conserved gene.
Os03g0183300	5.91e-17	0.254234	0.231	0.079	1.28e-12	2			Pathogenesis-related transcriptional factor and ERF domain containing protein.
Os04g0403900	1.06e-15	0.296004	0.235	0.086	2.3e-11	2			Similar to H0502B11.1 protein.
OsPTpsbB	2.65e-14	0.309461	0.167	0.052	5.77e-10	2	NA	NA	NA	NA
OsPTatpF	7.58e-11	0.377875	0.197	0.082	1.65e-06	2	NA	NA	NA	NA
OsPTrbcL	9.33e-11	0.288651	0.102	0.028	2.03e-06	2	NA	NA	NA	NA
Os09g0109600	2.31e-169	0.901732	0.407	0.019	5.01e-165	3	OsDSSR1	O. sativa drought and salt stress response-1	Small peptide, Drought tolerance	29576089
Os04g0510900	3.64e-164	0.923622	0.486	0.035	7.92e-160	3			Similar to Embryo-specific protein 1 (ATS1).
Os03g0322900	4.7e-145	0.76955	0.387	0.022	1.02e-140	3	LEA17, OsLEA17, OsLEA3-2, LEA3-2	LATE EMBRYOGENESIS ABUNDANT PROTEIN 17, late embryogenesis abundant protein 17	Late embryogenesis abundant (LEA) protein, Abiotic stress tolerance	23024799
Os10g0437500	2.26e-129	0.512537	0.255	0.006	4.9e-125	3			Rossmann-like alpha/beta/alpha sandwich fold domain containing protein.
Os05g0349800	1.02e-123	1.13689	0.473	0.052	2.21e-119	3	OsEm1, OsLEA21	late embryogenesis abundant protein 21	Group I late embryogenesis abundant (LEA) protein, Positive regulation of drought tolerance	27524243
Os05g0361700	8.42e-121	0.446558	0.263	0.009	1.83e-116	3			Similar to ethylene responsive element binding protein 2.
Os04g0275950	5.12e-115	0.900093	0.56	0.08	1.11e-110	3			Conserved hypothetical protein.
Os06g0168700	1.48e-111	1.77534	0.432	0.049	3.22e-107	3			Similar to Prolin rich protein.
Os02g0700100	4.86e-111	1.16955	0.309	0.019	1.06e-106	3	CDC20.2	Cell Division Cycle 20.2	Cell Division Cycle 20 (CDC20) protein, Cell cycle regulator, Required for faithful meiotic chromosome segregation and cytokinesis	34865119
Os07g0405700	1.37e-110	0.397295	0.21	0.005	2.97e-106	3			Conserved hypothetical protein.
Os03g0168100	1.99e-110	0.545462	0.255	0.01	4.33e-106	3			Late embryogenesis abundant protein repeat containing protein.
Os01g0705200	1.01e-105	0.834021	0.461	0.059	2.19e-101	3			Late embryogenesis abundant protein repeat containing protein.
Os02g0700500	1.56e-104	0.458442	0.305	0.02	3.38e-100	3	OsPUT1, PUT1	POLYAMINE UPTAKE TRANSPORTER 1, POLYAMINE UPTAKE TRANSPORTER1, polyamine uptake transporter 1	Polyamine uptake transporter, High-affinity spermidine transporter, Import of spermidine transported via phloem, Polyamine uptake	21796369
Os12g0621900	1.87e-104	0.781887	0.481	0.066	4.07e-100	3			Similar to Mov34/MPN/PAD-1 family protein, expressed.
Os02g0530600	2.03e-104	0.604488	0.383	0.036	4.41e-100	3	OsPARP3	poly(ADP-ribose) polymerase 3	Poly(ADP-ribose) polymerase, Double-strand break (DSB) repair, Likely to be involved in the Ku-independent alternative non-homologous end-joining pathway (A-NHEJ pathway)	27462908
Os03g0305600	4.27e-103	0.543992	0.37	0.034	9.28e-99	3			Mitochondrial import inner membrane translocase, subunit Tim17/22 family protein.
Os03g0197300	1.05e-102	0.878383	0.473	0.065	2.29e-98	3			Similar to Cupin family protein, expressed.
Os03g0159600	2.92e-102	0.992274	0.412	0.046	6.36e-98	3			Similar to Rab28 protein.
Os01g0391100	8.35e-102	0.723138	0.432	0.052	1.82e-97	3			Hypothetical gene.
Os05g0569500	6.88e-98	0.72409	0.362	0.036	1.5e-93	3			Similar to Embryo-specific protein.
Os03g0268600	2.28e-94	0.57419	0.374	0.04	4.96e-90	3			Similar to Protein phosphatase type 2C.
Os04g0126900	8.42e-93	0.323397	0.218	0.009	1.83e-88	3			Similar to H0124E07.4 protein.
Os04g0653600	1.33e-91	0.25759	0.181	0.005	2.9e-87	3			Similar to AINTEGUMENTA-like protein.
Os01g0372100	3.98e-90	0.489544	0.354	0.036	8.64e-86	3			Hypothetical gene.
Os10g0361876	3.12e-86	0.316962	0.23	0.013	6.77e-82	3			Conserved hypothetical protein.
Os03g0149200	6.78e-86	0.273522	0.198	0.008	1.47e-81	3			HR-like lesion-inducer family protein.
Os02g0451501	5.1e-84	0.313632	0.222	0.012	1.11e-79	3			Conserved hypothetical protein.
Os12g0569200	1.28e-83	0.378548	0.235	0.014	2.78e-79	3			Conserved hypothetical protein.
Os04g0553500	1.91e-82	0.541332	0.222	0.013	4.16e-78	3			Pectin lyase fold domain containing protein.
Os08g0420600	8.74e-82	0.295382	0.202	0.009	1.9e-77	3			Similar to Permease 1.
Os01g0749000	2.49e-80	0.531288	0.263	0.021	5.42e-76	3			Protein of unknown function DUF1264 family protein.
Os02g0205200	4.41e-78	0.341578	0.177	0.007	9.59e-74	3			Similar to Unidentified precursor.
Os11g0451700	1.77e-77	0.685794	0.284	0.027	3.84e-73	3			Similar to Dehydrin DHN1 (M3) (RAB-17 protein).
Os01g0198000	6.44e-75	0.258825	0.177	0.007	1.4e-70	3	OsRDR4	RNA-dependent RNA polymerase 4	&gamma;-clade RNA-dependent RNA polymerase 4, Rice growth and development	34449900
Os12g0255850	9.85e-75	0.343539	0.222	0.015	2.14e-70	3			Conserved hypothetical protein.
Os02g0232000	3.87e-74	0.3527	0.21	0.013	8.41e-70	3			Similar to Heat shock transcription factor 29 (Fragment).
Os11g0184900	1.64e-72	0.612923	0.346	0.047	3.56e-68	3	NAC5, OsNAC5, NAC71, ONAC071, ONAC009, ONAC9, ONAC020, ONAC20, OnNAC5*, OnNAC5, OsNAC5/ONAC009	NAC DOMAIN-CONTAINING PROTEIN 5, NAC 5, NAC domain-containing protein 71, ONNAC GENE 5, OsNAC gene-5, NAC domain-containing protein 9, NAC domain-containing protein 20, OnNAC gene-5	NAC-type transcription factor, Regulation of stress-inducible genes, Stress tolerance	20632034, 10660065
Os01g0192000	4.6e-72	0.433856	0.3	0.034	9.99e-68	3	DOS, OsDOS, OsC3H2, C3H2, OsTZF2, OsCCCH-Zn-4	DELAY OF THE ONSET OF SENESCENCE, delay of the onset of senescence, Zinc finger CCCH domain-containing protein 2, Protein DELAY OF THE ONSET OF SENESCENCE, Tandem zinc finger protein 2	CCCH-type zinc finger protein, Negative regulator for leaf senescence	16778011
Os07g0182400	7.73e-68	0.292887	0.16	0.007	1.68e-63	3			AUX/IAA protein family protein.
Os04g0386700	2.35e-66	0.260514	0.177	0.01	5.11e-62	3			Similar to OSIGBa0148P16.6 protein.
Os04g0610600	9.26e-66	0.433039	0.235	0.021	2.01e-61	3			Similar to Cor14b protein precursor.
Os02g0498666	1.32e-64	0.291636	0.214	0.017	2.88e-60	3			Non-protein coding transcript.
Os04g0463100	1.44e-62	0.409967	0.259	0.029	3.13e-58	3			Conserved hypothetical protein.
Os05g0446600	1.3e-61	0.290267	0.214	0.018	2.83e-57	3			Similar to DNA glycosylase/lyase 701.
Os07g0682400	1.67e-61	0.368263	0.288	0.037	3.63e-57	3			Nucleotide-binding, alpha-beta plait domain containing protein.
Os05g0314700	2.3e-61	0.569241	0.35	0.057	5e-57	3			Conserved hypothetical protein.
Os04g0390700	2.35e-61	0.256375	0.181	0.012	5.1e-57	3			Short-chain dehydrogenase/reductase SDR domain containing protein.
Os01g0911700	1.48e-59	0.27155	0.21	0.018	3.22e-55	3	OsVP1	Viviparous1	B3 domain-containing transcriptional activator, Control of seed dormancy	DOI:10.1016/j.cj.2020.06.005
Os08g0221300	6.75e-59	0.280943	0.202	0.017	1.47e-54	3			Conserved hypothetical protein.
Os03g0796600	1.95e-58	0.280022	0.193	0.015	4.24e-54	3			Protein of unknown function DUF506, plant family protein.
Os06g0657500	3.1e-58	0.267256	0.156	0.009	6.75e-54	3	HL6	Hairy Leaf 6	AP2/ERF transcription factor, Regulation of trichome formation	28965833
Os03g0821250	4.27e-58	0.265523	0.185	0.014	9.28e-54	3			Conserved hypothetical protein.
Os09g0526200	9.18e-57	0.341257	0.202	0.018	2e-52	3			Similar to Homeobox-leucine zipper protein ROC6.
Os08g0127900	9.21e-55	1.02369	0.235	0.028	2e-50	3			Similar to Globulin 1 (Fragment).
Os09g0324000	9.23e-55	0.286654	0.181	0.015	2e-50	3			Similar to Oleosin.
Os12g0510750	4.68e-53	0.25669	0.181	0.015	1.02e-48	3			Conserved hypothetical protein.
Os03g0401300	8.59e-51	0.31289	0.23	0.028	1.87e-46	3			Sucrose synthase 2 (EC 2.4.1.13) (Sucrose-UDP glucosyltransferase 2).
Os08g0431300	2.54e-49	0.323673	0.247	0.034	5.52e-45	3			Similar to Dihydrolipoamide S-acetyltransferase.
Os09g0451000	9.04e-49	0.309506	0.169	0.015	1.96e-44	3	ACO1, OsACO1, ACO	AMINOCYCLOPROPANE-1-CARBOXYLIC ACID OXIDASE 1, ACC oxidase 1, ACC oxidase	ACC oxidase, Ethylene biosynthesis	17012402
Os09g0297400	1.19e-48	0.297725	0.235	0.031	2.58e-44	3			Similar to Phosphate/phosphoenolpyruvate translocator.
Os04g0679400	1.12e-47	0.432965	0.325	0.064	2.43e-43	3			Similar to H0801D08.15 protein.
Os11g0440866	2.55e-46	0.437754	0.296	0.054	5.54e-42	3			Non-protein coding transcript.
Os02g0718600	6.78e-46	0.340458	0.214	0.027	1.47e-41	3			Conserved hypothetical protein.
Os01g0201600	2.93e-45	0.570016	0.16	0.015	6.36e-41	3	OsGAE1	GA-enhanced gene 1	GA-regulated growth and development	16915516
Os03g0663800	1.07e-44	0.268816	0.181	0.019	2.33e-40	3			Globulin 1 (Fragment).
Os02g0819400	1.98e-44	0.434371	0.317	0.064	4.31e-40	3	OsLpa1.2, Oslpa1, Lpa1, OsLpa1	LOW PHYTIC ACID 1, Low phytic acid-1, low phytic acid 1	Phytic acid metabolism	18566795
Os10g0462600	1.93e-42	0.361013	0.272	0.049	4.2e-38	3			Conserved hypothetical protein.
Os01g0915200	7.9e-42	0.337348	0.222	0.033	1.72e-37	3			Similar to cysteine proteinase inhibitor B.
Os05g0412800	6.08e-41	0.253893	0.115	0.007	1.32e-36	3			Similar to Glutathione S-transferase GST 41 (EC 2.5.1.18).
Os01g0702500	8.86e-41	0.3057	0.14	0.012	1.92e-36	3			Similar to Dehydrin Rab25.
Os03g0328900	6.06e-39	0.270411	0.235	0.039	1.32e-34	3			Similar to cDNA clone:J033099F01, full insert sequence.
Os03g0793700	1.66e-38	0.704193	0.321	0.078	3.61e-34	3	OsCDP3.10, qSP3	cupin domain protein 3.10, QTL for seedling percentage 3	Cupin domain protein, Regulation of seed vigour	34665915
Os05g0542500	2.98e-38	0.685934	0.309	0.072	6.48e-34	3	OsLEA3-1	Late embryogenesis abundant protein 3-1	Late embryogenesis abundant (LEA) protein, Drought and salt stress response	17426956
Os03g0164300	5.52e-38	0.295293	0.14	0.013	1.2e-33	3			Conserved hypothetical protein.
Os06g0651200	3.62e-36	0.386362	0.243	0.045	7.86e-32	3			Conserved hypothetical protein.
Os09g0551600	5.26e-36	0.377877	0.255	0.051	1.14e-31	3			Similar to HMGd1 protein (Nucleasome/chromatin assembly factor D protein NFD101).
Os03g0183300	1.22e-33	0.355661	0.305	0.074	2.65e-29	3			Pathogenesis-related transcriptional factor and ERF domain containing protein.
Os02g0469300	2.84e-32	0.311476	0.243	0.05	6.17e-28	3			ATP-binding region, ATPase-like domain containing protein.
Os08g0327400	4.12e-32	0.257206	0.226	0.044	8.95e-28	3			Similar to Enoyl-ACP reductase (Fragment).
Os02g0474000	4.22e-32	0.273318	0.255	0.055	9.17e-28	3			F-box associated interaction domain domain containing protein.
Os06g0649600	6.11e-30	0.34564	0.226	0.047	1.33e-25	3			Non-protein coding transcript.
Os02g0668500	2.11e-29	0.393453	0.292	0.078	4.59e-25	3			Cellular retinaldehyde-binding/triple function, C-terminal domain containing protein.
Os04g0589800	2.17e-29	0.261389	0.16	0.025	4.71e-25	3			Late embryogenesis abundant (LEA) group 1 family protein.
Os03g0607200	3.66e-28	0.270559	0.222	0.048	7.96e-24	3			Gibberellin regulated protein family protein.
Os04g0253000	9.57e-28	0.323855	0.152	0.024	2.08e-23	3			Similar to Histone H1.
Os02g0684400	4.67e-27	0.338753	0.259	0.067	1.01e-22	3			Similar to OXS3 (OXIDATIVE STRESS 3).
Os11g0454300	5.3e-27	0.446273	0.206	0.044	1.15e-22	3	Rab16A	responsive to abscisic acid 16A	Group 2 late embryogenesis abundant (LEA) protein, Salt tolerance	22499169
Os03g0279200	6.32e-25	0.477847	0.189	0.04	1.37e-20	3			Similar to Histone H2A.
Os05g0111300	2.07e-24	0.737823	0.247	0.068	4.51e-20	3	OsMT2b	METALLOTHIONEIN2b	Metallothionein, Reactive oxygen species (ROS) scavenger protein, Root development and seed embryo germination, Distribution of Zn to grain	32772382, 31004187, 18258694, 15220467
OsMTrps3	2.22e-24	0.353099	0.267	0.076	4.82e-20	3	NA	NA	NA	NA
Os06g0308300	3.78e-24	0.256237	0.251	0.068	8.21e-20	3			Similar to 65kD microtubule associated protein.
Os04g0173800	1.32e-23	0.281395	0.107	0.014	2.88e-19	3			Lectin precursor (Agglutinin).
Os11g0545300	1.4e-23	0.25741	0.313	0.096	3.05e-19	3	OsSpo11-5		Homologue of the archaeal topoisomerase VIA	21637817
Os06g0159450	1.55e-21	0.269187	0.103	0.014	3.36e-17	3			Similar to Histone H3.
Os09g0553100	3.66e-21	0.342479	0.189	0.046	7.95e-17	3			Similar to Histone H4.
Os01g0153100	8.34e-21	0.29215	0.156	0.033	1.81e-16	3			Similar to Histone H2B-3 (Fragment).
Os03g0799000	8.53e-19	0.275701	0.198	0.054	1.85e-14	3			Similar to Histone H1.
Os06g0336200	1.45e-18	0.266787	0.177	0.044	3.16e-14	3			Delta-tonoplast intrinsic protein.
Os10g0542100	1.28e-17	0.250752	0.107	0.019	2.78e-13	3			Similar to cDNA clone:001-035-G09, full insert sequence.
Os10g0470100	3.62e-17	0.422539	0.218	0.067	7.86e-13	3			Plant EC metallothionein-like protein, family 15 protein.
OsMTrps1	1.97e-16	0.269187	0.259	0.093	4.27e-12	3	NA	NA	NA	NA
Os02g0699500	8.21e-16	0.429124	0.136	0.033	1.78e-11	3			Conserved hypothetical protein.
Os05g0438700	1.38e-15	0.298905	0.123	0.028	3e-11	3			Similar to Histone H3.
Os08g0205800	1.57e-15	0.252279	0.189	0.057	3.42e-11	3			Hypothetical conserved gene.
Os05g0574300	1.71e-15	0.266365	0.119	0.026	3.71e-11	3			Similar to Histone H2B.2.
Os04g0599800	7.15e-15	0.308383	0.123	0.029	1.55e-10	3	CDC20.1	Cell Division Cycle 20.1	Cell Division Cycle 20 (CDC20) protein, Cell cycle regulator, Required for faithful meiotic chromosome segregation and cytokinesis	34865119
Os12g0530000	7.72e-10	0.345599	0.136	0.046	1.68e-05	3			Similar to Histone H2A.
Os12g0115100	0.00317718	0.267103	0.136	0.081	1	3			Nonspecific lipid-transfer protein 1 precursor (LTP 1) (PAPI).
Os07g0219300	1.87e-56	0.889613	0.252	0.029	4.07e-52	4			Prolamin precursor (13 kDa prolamin).
Os07g0219400	1.06e-50	0.93949	0.229	0.027	2.3e-46	4			Prolamin precursor.
Os05g0328800	2.44e-48	0.765641	0.248	0.033	5.31e-44	4			Prolamin 7.
Os07g0220000	3.95e-35	0.428894	0.15	0.016	8.59e-31	4			Similar to Prolamin.
Os05g0329350	7.45e-34	0.392442	0.15	0.017	1.62e-29	4			Prolamin.
Os02g0177500	5.82e-22	0.322333	0.252	0.069	1.27e-17	4			Similar to Small nuclear ribonucleoprotein F (snRNP-F) (Sm protein F) (Sm-F) (SmF).
Os05g0400400	1.38e-17	0.2545	0.215	0.061	2.99e-13	4			Similar to Ubiquinol-cytochrome c reductase complex 8.0 kDa protein (EC 1.10.2.2).
Os01g0962400	9.69e-15	0.302238	0.252	0.091	2.11e-10	4			Ubiquitin-like, Ufm1 domain containing protein.
Os05g0330600	7.56e-13	0.278458	0.252	0.099	1.64e-08	4			Similar to Prolamin.
Os05g0140800	1.21e-258	1.41967	0.698	0.032	2.64e-254	5			Similar to Dormancy related protein (Fragment).
Os04g0390800	8.74e-221	1.15512	0.611	0.028	1.9e-216	5			NAD(P)-binding domain containing protein.
Os05g0314700	6.15e-219	1.20759	0.722	0.045	1.34e-214	5			Conserved hypothetical protein.
Os10g0470100	3.51e-189	1.83731	0.667	0.048	7.62e-185	5			Conserved hypothetical protein.
Os04g0275950	3.26e-176	1.41096	0.784	0.08	7.08e-172	5			Conserved hypothetical protein.
Os02g0644000	5.12e-155	0.777996	0.512	0.031	1.11e-150	5	OsVPE3, REP-2	vacuolar processing enzyme 3	Vacuolar processing enzyme, Asparaginyl endopeptidase, Mediationn of GA-induced programmed cell death in aleurone layers	32232682, 12684786
Os07g0298900	5.32e-155	0.704199	0.395	0.015	1.16e-150	5			Heavy metal transport/detoxification protein domain containing protein.
Os04g0513100	2.45e-148	0.460722	0.284	0.005	5.33e-144	5	Os4BGlu14	beta-Glucosidase 14, &beta;-Glucosidase 14	Monolignol &beta;-glucosidase, Regulation of seed longevity	32833149
Os02g0503900	1.08e-145	0.597666	0.383	0.015	2.34e-141	5			Cytochrome P450 family protein.
Os01g0935600	6.04e-118	0.522254	0.383	0.022	1.31e-113	5			Immunoglobulin/major histocompatibility complex, conserved site domain containing protein.
Os02g0725900	5.13e-114	1.13774	0.401	0.027	1.11e-109	5	HAP3K, OsHAP3K/OsNF-YB1, OsHAP3K, OsNF-YB1, nf-yb1, OsLEC1, OsNF-YB-1, NFYB1, OsEnS-41	HAP3K SUBUNIT OF CCAAT-BOX BINDING COMPLEX, Nuclear transcription factor Y subunit B-1, CCAAT-binding transcription factor subunit NF-YB1, leafy cotyledon 1, endosperm-specific gene 41, Nuclear Factor YB1	Component of the NF-Y/HAP transcription factor complex, Regulation of endosperm development	25178525, 18193457, 11971906
Os03g0842900	1.63e-111	0.468681	0.302	0.013	3.54e-107	5			Similar to Steroleosin-B.
Os01g0372100	4.46e-108	0.689153	0.457	0.039	9.69e-104	5			Hypothetical gene.
Os02g0819400	4.64e-103	0.806579	0.531	0.059	1.01e-98	5	OsLpa1.2, Oslpa1, Lpa1, OsLpa1	LOW PHYTIC ACID 1, Low phytic acid-1, low phytic acid 1	Phytic acid metabolism	18566795
Os08g0544400	5.98e-97	0.660225	0.315	0.018	1.3e-92	5	OsPDR1, OsPDR1.3, OsABCG45	pleiotropic drug resistance 1	A member of the pleiotropic drug resistance (PDR) subfamily of ATP-binding cassette (ABC) transporter, Regulation of plant growth and pathogen resistance	32771142
Os11g0698567	1.97e-95	1.12286	0.222	0.007	4.29e-91	5			Conserved hypothetical protein.
Os03g0159600	2.91e-93	0.760676	0.481	0.052	6.33e-89	5			Similar to Rab28 protein.
Os01g0276300	4.95e-93	0.505727	0.296	0.016	1.08e-88	5			Similar to Group 3 late embryogenesis abundant protein (Fragment).
Os03g0793700	2.13e-91	0.79355	0.549	0.073	4.63e-87	5	OsCDP3.10, qSP3	cupin domain protein 3.10, QTL for seedling percentage 3	Cupin domain protein, Regulation of seed vigour	34665915
Os03g0142800	1.7e-89	0.727698	0.574	0.083	3.69e-85	5	OsMRP5	multidrug resistance-associated protein 5	Multidrug resistance-associated protein (MRP) ATP-binding cassette (ABC) transporter, Rice orthologue of the maize Lpa1 gene, Phytic acid metabolism	19370321
Os09g0489500	3.06e-87	0.375053	0.265	0.014	6.65e-83	5	OsTGA10	TGA factor 10, TGACGTCA cis-element-binding protein 10	bZIP transcription factor, Tapetum development	29158333, 27208278
Os06g0651200	7.61e-86	0.69496	0.414	0.042	1.65e-81	5			Conserved hypothetical protein.
Os03g0557900	1.1e-85	0.47776	0.253	0.012	2.39e-81	5			Hypothetical gene.
Os02g0503700	8e-85	0.26898	0.179	0.004	1.74e-80	5			Similar to Cytochrome P450 CYP81L6.
Os08g0221300	7.39e-84	0.457534	0.284	0.017	1.61e-79	5			Conserved hypothetical protein.
Os10g0430900	4.23e-81	0.819847	0.494	0.069	9.2e-77	5			Tyrosine protein kinase domain containing protein.
Os09g0511600	6.08e-80	0.435701	0.34	0.029	1.32e-75	5	Os9BGlu31	beta-glucosidase 31	Transglucosidase	23430256
Os04g0504700	4.16e-79	0.292719	0.204	0.008	9.04e-75	5			Conserved hypothetical protein.
Os08g0270000	7.13e-79	0.283175	0.173	0.004	1.55e-74	5			F-box domain, cyclin-like domain containing protein.
Os03g0277500	2.47e-76	0.370501	0.228	0.011	5.37e-72	5			Similar to Glyoxalase family protein, expressed.
Os05g0542500	7.33e-76	0.73113	0.488	0.068	1.59e-71	5	OsLEA3-1	Late embryogenesis abundant protein 3-1	Late embryogenesis abundant (LEA) protein, Drought and salt stress response	17426956
Os03g0561283	1.33e-75	0.292719	0.198	0.008	2.9e-71	5			Conserved hypothetical protein.
Os06g0326700	1.24e-74	0.468678	0.34	0.031	2.7e-70	5			Diacylglycerol acyltransferase family protein.
Os07g0662900	5.45e-72	0.545286	0.414	0.051	1.18e-67	5			Similar to 4-alpha-glucanotransferase (EC 2.4.1.25).
Os02g0136150	2.98e-70	0.383182	0.253	0.017	6.47e-66	5			Hypothetical gene.
Os07g0638300	1.77e-67	0.578578	0.377	0.045	3.85e-63	5	Os1-CysPrxA	1 Cys-peroxiredoxin A	1 Cys-peroxiredoxin A, Regulation of endosperm development	28647924
Os01g0743500	3.54e-67	0.313133	0.253	0.018	7.69e-63	5	OscytME3	cytosolic NADP-ME 3, cytosolic NADP malic enzyme 3	Cytosolic NADP malic enzyme	15388961
Os03g0197300	8.41e-66	0.578379	0.481	0.075	1.83e-61	5			Similar to Cupin family protein, expressed.
Os07g0134000	8.61e-64	0.33632	0.228	0.015	1.87e-59	5	OsAAP6, AAP6, OsAAP1, AAP1	amino acid permease 6, amino acid permease 1, amino acid/auxin permease 1	Amino acid permease, Transport of amino acids	25907566, 23166615
Os03g0170900	1.18e-62	0.326548	0.247	0.019	2.56e-58	5	OsSUT1	Sucrose transporter 1	Sucrose transporter, Required for apoplastic phloem sucrose loading, Essential for normal pollen germination	20603282, 17138625, 9522469
Os03g0689300	1.5e-61	0.683295	0.438	0.071	3.26e-57	5	OSA1	plasma membrane H<sup>+</sup>-ATPase 1	Plasma membrane H<sup>+</sup>-ATPase 1, Regulation of ammonium (NH<sub>4</sub><sup>+</sup>) uptake, Regulation of stomatal opening for C fixation, Control of photosynthesis	33531490
Os03g0189600	5.48e-61	0.359067	0.185	0.009	1.19e-56	5			Similar to Alcohol dehydrogenase.
Os03g0689100	1.55e-59	0.571429	0.34	0.041	3.38e-55	5			Histidine acid phosphatase family protein.
Os02g0237000	6.52e-57	0.262224	0.173	0.009	1.42e-52	5			Similar to peroxidase 52.
Os04g0497000	8.21e-57	0.518285	0.34	0.043	1.78e-52	5			Similar to Allyl alcohol dehydrogenase.
Os08g0465800	1.99e-56	0.279205	0.185	0.011	4.33e-52	5	RicGAD	rice glutamate decarboxylase	Glutamate decarboxylase, Ca<sup>2+</sup>/calmodulin-dependent enzyme	16202241
Os01g0136100	1.27e-54	0.357574	0.235	0.02	2.76e-50	5	OsHsp16.9A	16.9 kDa class I heat shock protein	16.9 kDa class I small heat shock protein	31797121
Os10g0101200	2.61e-54	0.31571	0.228	0.019	5.67e-50	5	SCP45, OsSCP45, OsSCP46, SCP46	SERINE CARBOXYPEPTIDASE 45, Serine carboxypeptidase 45, Serine carboxypeptidase 46	Serine carboxypeptidase, Regulation of grain filling and seed germination	27448032
Os04g0652400	9.77e-54	0.274735	0.198	0.014	2.12e-49	5	SULTR3;3, OsSultr3;3, OsSul3;3, OsSULTR3;3	SULPHATE TRANSPORTER 3;3, sulphate transporter 3;3	Ortholog of the sulfate transporter family group 3 , Grain metabolism	27110682
Os05g0172800	2.43e-52	0.43233	0.216	0.018	5.28e-48	5			Conserved hypothetical protein.
Os02g0809500	1.97e-51	0.428166	0.315	0.041	4.28e-47	5	OsSEC24		Functional SEC24-like protein, Coat protein, Tolerance to iron deficiency and high pH by enhancing H<sup>+</sup>secretion	25711814
Os02g0530600	1.89e-50	0.60732	0.333	0.048	4.11e-46	5	OsPARP3	poly(ADP-ribose) polymerase 3	Poly(ADP-ribose) polymerase, Double-strand break (DSB) repair, Likely to be involved in the Ku-independent alternative non-homologous end-joining pathway (A-NHEJ pathway)	27462908
Os06g0324400	6.95e-50	0.391197	0.216	0.019	1.51e-45	5			Late embryogenesis abundant (LEA) group 1 family protein.
Os11g0432900	7.4e-50	0.358014	0.284	0.034	1.61e-45	5			Peptidase S10, serine carboxypeptidase family protein.
Os05g0171900	7.52e-49	0.341247	0.253	0.027	1.63e-44	5			Glyoxalase/bleomycin resistance protein/dioxygenase domain containing protein.
Os01g0717000	1.26e-48	0.62928	0.401	0.072	2.74e-44	5			Similar to GmCK1p (EC 2.7.1.32).
Os04g0508300	6.49e-48	0.46867	0.401	0.072	1.41e-43	5	OsGrxC2.2		Glutaredoxin, Regulation of embryo development	31316541
Os01g0303300	2.16e-42	0.321686	0.222	0.024	4.69e-38	5			Similar to Stress-inducible membrane pore protein.
Os12g0621900	6.66e-42	0.490597	0.401	0.08	1.45e-37	5			Similar to Mov34/MPN/PAD-1 family protein, expressed.
Os06g0265400	1.45e-41	0.296766	0.191	0.018	3.15e-37	5	OsbZIP47	bZIP transcription factor 47	TGA transcription factor, bZIP transcription factor, Negative regulation of grain width and weight	33930509, 18065552
Os12g0255850	1.81e-40	0.294113	0.204	0.021	3.93e-36	5			Conserved hypothetical protein.
Os03g0305600	2.87e-39	0.345117	0.296	0.047	6.24e-35	5			Mitochondrial import inner membrane translocase, subunit Tim17/22 family protein.
Os06g0524400	3.86e-39	0.408195	0.309	0.052	8.38e-35	5			Protein of unknown function DUF231, plant domain containing protein.
Os07g0188000	3.11e-38	0.279205	0.154	0.012	6.76e-34	5			Similar to Argonaute 4 protein.
Os08g0521600	1.61e-36	0.316499	0.21	0.025	3.5e-32	5	OsERF115/AP2EREBP110		AP2/EREBP family transcription factor, Tolerance to heat and drought stress	34281241
Os09g0518700	1.82e-36	0.289707	0.222	0.029	3.94e-32	5	OsITPK6	Inositol 1, 3,4-trisphosphate 5/6-kinase 6	Inositol 1, 3,4-trisphosphate 5/6-kinase 6, Phytic acid biosynthesis, Essential for rice growth and reproduction	31035443
Os05g0447700	1.32e-35	0.46516	0.414	0.098	2.86e-31	5			Tetratricopeptide-like helical domain containing protein.
Os02g0540700	2.87e-35	0.300247	0.241	0.035	6.24e-31	5			Similar to Arm repeat-containing protein.
Os03g0663800	2e-33	0.258754	0.191	0.023	4.35e-29	5			Globulin 1 (Fragment).
Os12g0479400	4.77e-33	0.391496	0.383	0.09	1.04e-28	5	OsARF24	auxin response factor 24	Auxin response factor 24	24982173
Os04g0650900	6.12e-32	0.375076	0.259	0.045	1.33e-27	5			Similar to Alpha-N-acetylglucosaminidase.
Os10g0556100	5.91e-30	0.52571	0.383	0.1	1.28e-25	5			Similar to beta-expansin EXPB4.
Os12g0115100	9e-30	0.696562	0.321	0.073	1.96e-25	5			Nonspecific lipid-transfer protein 1 precursor (LTP 1) (PAPI).
Os01g0391100	9.72e-30	0.408714	0.315	0.068	2.11e-25	5			Hypothetical gene.
Os05g0295300	1.53e-29	0.357863	0.315	0.069	3.33e-25	5	OsACC1	acetyl-coenzyme A carboxylase 1	Acetyl-coenzyme A carboxylase, Herbicide-inhibiting gene	34112987
Os05g0569500	1.57e-29	0.302597	0.265	0.049	3.4e-25	5			Similar to Embryo-specific protein.
Os07g0191200	2.93e-29	0.280573	0.228	0.038	6.36e-25	5	OsPMA2, OsA2	PM H<sup>+</sup>-ATPase 2	Plasma membrane proton pump ATPase (H<sup>+</sup>-ATPase), Response to iron deficiency, Nitrogen uptake	25711814, 21421368
Os09g0505300	1.92e-28	0.263979	0.247	0.045	4.17e-24	5			Similar to Br FatA1.
Os02g0474000	7.79e-27	0.408456	0.278	0.059	1.69e-22	5			F-box associated interaction domain domain containing protein.
Os09g0464000	3.03e-25	0.305281	0.259	0.055	6.59e-21	5			Similar to Carbonate dehydratase-like protein.
Os04g0510900	3.22e-23	0.3602	0.259	0.058	6.99e-19	5			Similar to Embryo-specific protein 1 (ATS1).
Os07g0624600	1.21e-21	0.262353	0.198	0.038	2.63e-17	5			Similar to Trehalose-6-phosphate phosphatase.
Os11g0454300	4.2e-20	0.382308	0.216	0.047	9.13e-16	5	Rab16A	responsive to abscisic acid 16A	Group 2 late embryogenesis abundant (LEA) protein, Salt tolerance	22499169
Os03g0369100	4.14e-19	0.250162	0.123	0.017	9e-15	5	OsLTPL36		Lipid transfer protein, Regulation of seed development and germination, Regulation of seed quality	26398804
Os02g0522700	3.68e-16	0.30743	0.278	0.087	7.99e-12	5			Hypothetical conserved gene.
Os04g0244800	1.48e-15	0.281717	0.241	0.069	3.22e-11	5			Heavy metal transport/detoxification protein domain containing protein.
Os03g0815100	6.72e-15	0.272232	0.29	0.097	1.46e-10	5	OsNAC19, SNAC1	NAC-domain protein 19, STRESS-RESPONSIVE NAC 1	NAC-domain transcription factor, Response to infection by M. grisea, MeJA-mediated signaling pathway, Drought and salinitytolerance	16924117, DOI:10.1016/j.plantsci.2006.07.019
Os01g0944200	9.96e-15	0.333179	0.216	0.06	2.16e-10	5			Ribonuclease H-like domain containing protein.
Os11g0440866	1.06e-14	0.2875	0.222	0.063	2.3e-10	5			Non-protein coding transcript.
Os09g0522000	9.69e-14	0.32865	0.235	0.074	2.11e-09	5	OsDREB1B	Dehydration-responsive element-binding protein 1B	Transcription activator, "Tolerance to drought, high-salt and cold stresses"	16284406, 12609047
Os06g0553200	1.33e-13	0.259301	0.228	0.07	2.9e-09	5			Similar to Meiosis 5.
Os07g0608200	2.96e-12	0.306796	0.222	0.074	6.44e-08	5			Similar to CCAAT-binding transcription factor subunit B (CBF-B) (NF-Y protein chain A) (NF-YA) (CAAT-box DNA binding protein subunit A). Splice isoform Short.
Os08g0359200	9.08e-12	0.289339	0.253	0.091	1.97e-07	5			Similar to Lipid phosphate phosphatase 2 (EC 3.1.3.-) (AtLPP2) (Phosphatidic acid phosphatase 2) (AtPAP2) (Prenyl diphosphate phosphatase).
Os02g0628900	7.03e-247	0.862077	0.52	0.01	1.53e-242	6			Conserved hypothetical protein.
Os10g0372100	1.78e-195	0.747044	0.463	0.011	3.87e-191	6			Conserved hypothetical protein.
Os08g0497600	3.51e-194	0.8812	0.488	0.014	7.63e-190	6	SRWD1, SRWD1, OsWD40-162	SALT RESPONSIVE WD40 PROTEIN 1, salt responsive WD40 protein 1	WD40 subfamily protein, Salt stress	18755256
Os01g0877400	4.09e-178	1.32397	0.455	0.014	8.88e-174	6			Similar to Avr9 elicitor response-like protein.
Os01g0167900	5.52e-173	0.750587	0.407	0.01	1.2e-168	6			KIP1-like domain containing protein.
Os02g0513100	1.74e-169	1.24616	0.577	0.03	3.79e-165	6	OsSWEET15	Sugars Will Eventually be Exported Transporter 15	Clade III SWEET transporter, Sucrose transporter, Regulation of sucrose transport in response to drought and salt stress, TAL effector-mediated susceptibility to bacterial pathogen	32940908, 23879865
Os11g0156200	7.33e-168	0.707214	0.341	0.006	1.59e-163	6			Peptidase S28 family protein.
Os01g0191300	1.74e-154	1.09021	0.553	0.031	3.78e-150	6	OsNAC006		NAC transcription factor, Drought resistance	32225072
Os11g0508600	4.39e-154	1.36883	0.561	0.033	9.54e-150	6	11N3, OsSWEET14, Os11N3, Os-11N3, Xa41(t)	11N3, Xanthomonas oryzae pv. oryzae resistance 41	Sugar transporter, TAL effector-mediated susceptibility to bacterial pathogen	21098734, 23879865
Os01g0236300	8.07e-150	1.08843	0.65	0.049	1.75e-145	6			Similar to Auxin response factor 18.
Os03g0197000	3.06e-142	0.640483	0.366	0.011	6.64e-138	6			Di-trans-poly-cis-decaprenylcistransferase-like domain containing protein.
Os01g0374000	2.91e-138	0.780598	0.488	0.026	6.32e-134	6			Similar to Glutathione S-transferase I (EC 2.5.1.18) (GST-I) (GST-29) (GST class- phi).
Os07g0607700	6.09e-137	0.763819	0.431	0.019	1.32e-132	6			Di-trans-poly-cis-decaprenylcistransferase family protein.
Os05g0409500	3.25e-134	0.485413	0.276	0.005	7.05e-130	6			Similar to MtN21 protein.
Os01g0168600	9.81e-134	0.795977	0.439	0.021	2.13e-129	6			Similar to predicted protein.
Os02g0285300	7.97e-121	0.620689	0.398	0.019	1.73e-116	6			DREPP plasma membrane polypeptide family protein.
Os09g0433800	8.12e-121	0.609466	0.276	0.006	1.77e-116	6			Similar to Senescence-associated protein SAG102.
Os01g0667400	1.23e-115	0.460637	0.268	0.006	2.68e-111	6	DWT1, OsWOX7, Os WOX7, WOX7, OsWOX9A	DWARF TILLER 1, DWARF TILLER1, WUSCHEL-related homeobox 7, WUSCHEL-LIKE HOMEOBOX 7	WUSCHEL-related homeobox transcription factor, Tiller growth	24625559
Os02g0117700	2.69e-113	0.406555	0.26	0.006	5.84e-109	6	UGP2, Ugp2, OsUgp2	UDP-GLUCOSE PYROPHOSPHORYLASE 2, UDP-Glucose Pyrophosphorylase2, UDP-Glucose Pyrophosphorylase 2, UDPGase 2	UDPase	17400897
Os06g0208200	2.07e-112	0.757465	0.439	0.027	4.5e-108	6			Conserved hypothetical protein.
Os09g0479900	1.3e-109	0.880184	0.439	0.028	2.81e-105	6			Similar to Subtilisin-like protease.
Os08g0398350	2.23e-108	0.329586	0.203	0.002	4.84e-104	6			Similar to ABC transporter family, cholesterol/phospholipid flippase.
Os03g0223400	1.05e-107	1.58624	0.48	0.037	2.28e-103	6	GLN1;2, OsGLN1;2, GSr, RGS8, OsGS1;2, GS1;2, GS1	GLUTAMINE SYNTHETASE 1;2, cytosolic glutamine synthethase 1;2, cytosolic glutamine synthase 2, glutamine synthetase 1;2, glutamine synthetase 1	Cytosolic glutamine synthetase, Ammonium assimilation	2577497, 15574840
Os05g0342000	1.43e-106	0.714294	0.374	0.02	3.11e-102	6			Hypothetical conserved gene.
Os01g0885300	6.3e-106	0.696784	0.415	0.025	1.37e-101	6			Conserved hypothetical protein.
Os05g0447200	8.21e-105	0.505721	0.366	0.019	1.78e-100	6	OsAUX3		Auxin influx carrier, Regulation of root development, Response to aluminium stress	30399648
Os06g0651300	9.93e-105	0.521841	0.366	0.019	2.16e-100	6			Zinc finger, U1-type domain containing protein.
Os01g0201100	2.22e-103	0.327801	0.22	0.004	4.83e-99	6			Similar to xylosyltransferase oxt.
Os01g0757200	2.6e-95	0.558831	0.285	0.011	5.65e-91	6	GA2OX3, OsGA2ox3, ga2ox 3, OsGA2ox-3, GA2ox3, GA2ox-3	GIBBERELLIN 2-OXIDASE 3, rice GA 2-oxidase3, GA 2-oxidase 3, Gibberellin 2-oxidase 3	GA 2-oxidase3, GA metabolism	12736788, 15075394
Os11g0151700	2.37e-92	0.5066	0.325	0.017	5.15e-88	6	OsPAP21b, PAP21B	PURPLE ACID PHOSPHATASE 21B, purple acid phosphatase 21b	Purple acid phosphatase (EC:3.1.3.2), Improvement in phosphate acquisition and utilization	28116829
Os06g0167400	1.5e-91	0.49426	0.309	0.015	3.26e-87	6			Di-trans-poly-cis-decaprenylcistransferase family protein.
Os05g0556800	4.45e-89	0.547413	0.358	0.022	9.67e-85	6	OsPUP7	purine permease 7	Purine permease, Transport of cytokinin, Growth and development control	24034337
Os05g0228400	5.78e-89	0.475268	0.22	0.006	1.25e-84	6	OsbHLH073	basic helix-loop-helix protein 073	Atypical basic helix-loop-helix transcription factor, "Regulation of plant height, internode elongation, and panicle exsertion", Regulation of GA biosynthesis	32340222
Os02g0530100	1.88e-84	0.529959	0.35	0.023	4.09e-80	6			Similar to C4-dicarboxylate transporter/malic acid transport protein.
Os03g0112900	7.3e-84	0.403798	0.268	0.012	1.59e-79	6			Similar to Aldehyde 5-hydroxylase.
Os03g0685300	3.38e-82	0.638617	0.439	0.04	7.34e-78	6			Glutamine amidotransferase class-I domain containing protein.
Os06g0677300	4.05e-82	0.546567	0.309	0.018	8.81e-78	6			Zinc finger, RING/FYVE/PHD-type domain containing protein.
Os07g0406800	6.05e-80	0.503299	0.358	0.026	1.32e-75	6			DNA primase, large subunit, eukaryotic domain containing protein.
Os10g0465700	1.39e-79	1.17801	0.423	0.039	3.02e-75	6			Similar to Beta-amylase PCT-BMYI (EC 3.2.1.2).
Os01g0374100	1.59e-79	0.273076	0.154	0.002	3.45e-75	6			Non-protein coding transcript.
Os04g0117300	2.35e-78	0.279603	0.187	0.005	5.1e-74	6			SEC7-like domain containing protein.
Os03g0817900	9.26e-75	0.514105	0.358	0.028	2.01e-70	6			Protein of unknown function DUF231, plant domain containing protein.
Os08g0556900	1.29e-74	0.814028	0.439	0.046	2.81e-70	6			Similar to Cysteine proteinase (EC 3.4.22.-).
Os03g0367900	2.26e-74	0.598051	0.382	0.033	4.91e-70	6			Peptidase C15, pyroglutamyl peptidase I family protein.
Os08g0494300	1.97e-71	0.310014	0.228	0.01	4.28e-67	6			Copine domain containing protein.
Os09g0364800	3.18e-71	0.282727	0.146	0.002	6.9e-67	6			Heavy metal transport/detoxification protein domain containing protein.
Os12g0267200	4.93e-68	0.55141	0.26	0.015	1.07e-63	6			Cyclopropane-fatty-acyl-phospholipid synthase domain containing protein.
Os01g0297700	8.68e-67	0.367068	0.236	0.012	1.89e-62	6			Protein of unknown function DUF6, transmembrane domain containing protein.
Os01g0855400	9.58e-67	0.276932	0.187	0.007	2.08e-62	6			SANT domain, DNA binding domain containing protein.
Os08g0458600	1.48e-63	0.42891	0.211	0.01	3.22e-59	6			Signal transduction response regulator, receiver region domain containing protein.
Os02g0580700	5.68e-62	0.265948	0.187	0.007	1.24e-57	6			Conserved hypothetical protein.
Os03g0207200	7.54e-60	0.294863	0.228	0.013	1.64e-55	6			Syntaxin 6, N-terminal domain containing protein.
Os07g0635900	1.3e-59	0.415731	0.26	0.018	2.82e-55	6	OsLti6a	low temperature induced gene 6a	Low-molecular-weight hydrophobic protein, Cold stress-response	15656983
Os03g0291800	7.4e-59	0.289383	0.211	0.011	1.61e-54	6			Similar to ESK1 (ESKIMO 1).
Os04g0483200	8.02e-53	0.510964	0.341	0.039	1.74e-48	6			Steroid nuclear receptor, ligand-binding domain containing protein.
Os03g0825300	6.56e-49	0.35433	0.26	0.023	1.43e-44	6			Serine/threonine protein kinase domain containing protein.
Os11g0255300	1.56e-48	0.291866	0.114	0.003	3.4e-44	6			Cysteine endopeptidase (Cysteine proteinase (EC 3.4.22.-)-rice).
Os02g0557200	2.16e-45	0.346045	0.276	0.029	4.7e-41	6			Similar to Auxin response factor 1.
Os03g0237100	7.49e-45	0.274115	0.203	0.015	1.63e-40	6			Similar to NADPH-dependent codeinone reductase (EC 1.1.1.247).
Os01g0839900	1.43e-44	0.260181	0.179	0.011	3.1e-40	6			Thaumatin, pathogenesis-related family protein.
Os05g0148500	3.15e-42	0.266736	0.187	0.013	6.85e-38	6			Hypothetical conserved gene.
Os05g0477900	4.65e-42	0.810762	0.48	0.1	1.01e-37	6			Similar to nonspecific lipid-transfer protein.
Os05g0122600	1.29e-40	0.353453	0.171	0.011	2.81e-36	6			Prefoldin domain containing protein.
Os02g0120800	2.96e-40	0.36964	0.26	0.029	6.43e-36	6	OsRacB	GTPase protein RacB	GTPase, Rop family member, Salt tolerance, Negative regulation of disease resistance, Pollen germination	34519039, 16761097, 16531052
Os04g0465100	3.99e-39	0.318471	0.228	0.023	8.68e-35	6			Haem peroxidase, plant/fungal/bacterial family protein.
Os01g0780800	8.66e-39	0.291776	0.187	0.015	1.88e-34	6	OsULT1	ULTRAPETALA 1	SAND domain-containing protein, Trithorax group factor, Transcriptional regulation of stress responsive genes	30753903, 25925167
Os03g0168500	4.47e-38	0.449559	0.309	0.044	9.71e-34	6			Hypothetical conserved gene.
Os08g0483100	6.24e-37	0.48272	0.39	0.072	1.36e-32	6			Conserved hypothetical protein.
Os05g0287800	4.78e-36	0.34753	0.211	0.021	1.04e-31	6			Similar to Phosphatidic acid phosphatase-like protein.
Os02g0809800	3.64e-35	0.321098	0.179	0.015	7.92e-31	6	PHO1;2, OsPHO1;2	PHOSPHATE TRANSPORTER 1;2, PHOSPHATE1;2	Phosphate (Pi) transporter, Root-to-shoot Pi transfer	20081045
Os07g0267200	1.07e-34	0.395792	0.195	0.019	2.33e-30	6			Conserved hypothetical protein.
Os07g0437500	1.41e-34	0.385888	0.285	0.041	3.06e-30	6	TDC2	TRYPTOPHAN DECARBOXYLASE 2, Trp decarboxylase 2	Aromatic L-amino acid decarboxylase (AADC), Serotonin biosynthesis	17763868, 19439571
Os03g0286500	2.53e-34	0.305056	0.122	0.007	5.5e-30	6			Similar to RNA-binding region containing protein 1 (HSRNASEB) (ssDNA binding protein SEB4) (CLL-associated antigen KW-5). Splice isoform 2.
Os04g0605500	3.37e-34	0.435416	0.35	0.062	7.32e-30	6	ACA11, osACA11, OsACA6, OsACA5	CA2+-ATPASE 11, Ca2+ P-Type ATPase 11	P-type IIB Ca(2+) ATPase, Stress tolerance	24128296, 12805592, 24286292
Os12g0290600	2.73e-30	0.297194	0.252	0.036	5.94e-26	6			Similar to Dual specificity protein phosphatase 8 (EC 3.1.3.48) (EC 3.1.3.16) (Neuronal tyrosine threonine phosphatase 1).
Os02g0714000	1.57e-29	0.257887	0.203	0.024	3.42e-25	6			Similar to Yarrowia lipolytica chromosome C of strain CLIB99 of Yarrowia lipolytica.
Os05g0354400	2.28e-29	0.337459	0.293	0.05	4.95e-25	6			Similar to ESK1 (ESKIMO 1).
Os07g0139500	4.29e-29	0.410298	0.309	0.057	9.33e-25	6			Conserved hypothetical protein.
Os07g0600700	5.18e-29	0.290132	0.236	0.033	1.13e-24	6			X8 domain containing protein.
Os04g0432000	5.57e-29	0.375623	0.293	0.052	1.21e-24	6	SAPK7, OsSAPK7	STRESS/ABA-ACTIVATED PROTEIN KINASE 7, stress/ABA-activated protein kinase 7, Stress-Activated Protein Kinase 7	Serine/threonine protein kinase, Hyperosmotic stress response	15084714
Os08g0361000	7.39e-28	0.391409	0.301	0.056	1.61e-23	6			Conserved hypothetical protein.
Os05g0453300	8.12e-25	0.275407	0.211	0.031	1.77e-20	6			Conserved hypothetical protein.
Os03g0760800	6.73e-23	0.293639	0.236	0.041	1.46e-18	6	GASR1, OsGASR1	GA Stimulated Rice 1, GA-stimulated transcript-related gene 1	A member of the GAST (gibberellin (GA)-Stimulated Transcript) family, Control of seedling growth and &alpha;-amylase expression, Cell proliferation in meristems and panicles development	28482332, 16905871
Os03g0268400	7.56e-22	0.315906	0.236	0.044	1.64e-17	6	OsMPG3, OsVTC1-3	mannose-1-phosphate guanyl transferase 3	Mannose-1-phosphate guanyl transferase, GDP-mannose pyrophosphorylase, Ascorbic acid synthesis	26715595, 22644442
Os01g0812000	1.57e-21	0.328944	0.163	0.022	3.41e-17	6	GAMYB, MYBGA, OsGAMYB, GAM1, OsGAMyb, Os-MYBGA, Os GAMYB	GIBBERELLIN MYB GENE, homologue to the barley Myb-like transcription factor, Transcription factor GAMYB, Gibberellin myb gene	Transcriptional activator of gibberellin-dependent alpha-amylase expression, Regulation of nutrient mobilization in germination	22773748
Os04g0429300	3.76e-21	0.347751	0.268	0.057	8.16e-17	6			Similar to OSIGBa0093L02.4 protein.
Os07g0562800	9.88e-20	0.356352	0.309	0.078	2.15e-15	6	OsMyoVIIIA-2, OsMyoVIIIA	Myosin VIIIA-2, Myosin VIIIA	Myosin heavy chain class VIII A2 protein	15169941
Os03g0299600	2.7e-19	0.258196	0.203	0.036	5.87e-15	6			Wound-induced protein, Wun1 domain containing protein.
Os01g0837300	3.01e-19	0.257769	0.228	0.045	6.54e-15	6	OsUXS4	UDP-xylose synthase 4	UDP-glucuronic acid decarboxylase	15488465
Os10g0417800	3.58e-19	0.29749	0.179	0.029	7.79e-15	6			Protein of unknown function DUF506, plant family protein.
Os07g0607400	2.29e-18	0.330059	0.276	0.067	4.98e-14	6			Pectin lyase fold/virulence factor domain containing protein.
Os07g0581000	3.85e-18	0.250526	0.244	0.053	8.36e-14	6			Protein of unknown function DUF250 domain containing protein.
Os03g0712800	1.19e-17	0.256881	0.228	0.049	2.59e-13	6	OsGS1;3	cytosolic glutamine synthetase 1;3	Cytosolic glutamine synthetase	15918879
Os01g0898500	1.2e-16	0.472822	0.26	0.066	2.61e-12	6			Similar to Patatin (Fragment).
Os04g0476100	4.72e-15	0.316901	0.317	0.098	1.02e-10	6			Similar to Peroxisomal copper-containing amine oxidase.
Os06g0679500	7.01e-15	0.355331	0.26	0.072	1.52e-10	6			Similar to Avr9 elicitor response-like protein.
Os02g0469300	2.75e-14	0.321826	0.228	0.058	5.99e-10	6			ATP-binding region, ATPase-like domain containing protein.
Os04g0311100	4.99e-14	0.298527	0.268	0.079	1.08e-09	6			Similar to OSIGBa0148D14.7 protein.
Os11g0447300	6.73e-14	0.264626	0.179	0.039	1.46e-09	6			GTP-binding protein, HSR1-related domain containing protein.
Os02g0176700	1.02e-13	0.26084	0.268	0.078	2.22e-09	6			Similar to autoinhibited calcium ATPase.
Os01g0106700	2.12e-13	0.28988	0.276	0.084	4.62e-09	6	OsATM	ATAXIA TELANGIECTASIA-MUTATED	PI3Kc (Phosphoinositide 3-kinasecatalytic domain) and FATC (FRAP, ATM, TRRAP C-terminal) domain containing protein, ATM homolog, Accurate repair of meiotic double-strand breaks	32404412
Os03g0689300	1.24e-12	0.250573	0.268	0.082	2.69e-08	6	OSA1	plasma membrane H<sup>+</sup>-ATPase 1	Plasma membrane H<sup>+</sup>-ATPase 1, Regulation of ammonium (NH<sub>4</sub><sup>+</sup>) uptake, Regulation of stomatal opening for C fixation, Control of photosynthesis	33531490
Os10g0477000	3.88e-12	0.258736	0.276	0.09	8.43e-08	6			Armadillo-like helical domain containing protein.
Os06g0700700	1.13e-11	0.348949	0.244	0.077	2.45e-07	6	HMA2, OsHMA2, osHMA2	HEAVY METAL ATPASE 2, heavy metal ATPase 2, heavy metal transporter 2, heavy metal P-Type ATPase 2	P-Type heavy metal ATPase, Delivery of Zinc to developing tissues	23575418
Os04g0527000	1.69e-11	0.276244	0.252	0.08	3.67e-07	6			GRAM domain containing protein.
Os01g0261200	2.76e-11	0.334881	0.276	0.094	6e-07	6	OsNTL3		NAC transcription factor, Heat stress tolerance	31733092, 10660065
Os02g0102900	9.51e-11	0.256721	0.244	0.079	2.07e-06	6			Similar to RuBisCO subunit binding-protein beta subunit, chloroplast (60 kDa chaperonin beta subunit) (CPN-60 beta) (Fragment).
Os07g0136800	3.81e-10	0.320526	0.268	0.097	8.27e-06	6			Homeodomain-like containing protein.
Os05g0268500	5.29e-10	0.290632	0.252	0.088	1.15e-05	6			Similar to Serine carboxypeptidase II chains A and B (EC 3.4.16.6) (Carboxypeptidase D) (CPDW-II) (CP-WII).
Os05g0567100	6.59e-09	0.282866	0.195	0.064	0.000143235	6			Aspartic proteinase oryzasin 1 precursor (EC 3.4.23.-).
Os11g0512600	1.47e-07	0.311974	0.22	0.086	0.00318814	6	ONAC129	NAC domain-containing protein 129	NAC (NAM, ATAF1/2, CUC2) transcription factor, Heat stress response, Regulation of grain filling	33476364
Os02g0626200	1.17e-06	0.334211	0.163	0.057	0.0254181	6			Non-protein coding transcript.
Os02g0616600	3.06e-06	0.456521	0.195	0.079	0.0664864	6			Hypothetical protein.
Os09g0508250	1.95e-167	1.32422	0.342	0.004	4.23e-163	7			Similar to MTN3.
Os07g0634400	7.57e-156	1.428	0.513	0.016	1.65e-151	7			HAD-superfamily hydrolase, subfamily IA, variant 3 domain containing protein.
Os01g0948600	8.14e-156	1.6068	0.487	0.014	1.77e-151	7			Conserved hypothetical protein.
Os01g0169800	2.73e-130	0.645126	0.224	0.001	5.92e-126	7	FIB, fib	FISH BONE, fish bone	Tryptophan aminotransferase, Indole-3-acetic acid (IAA) biosynthesis	24654985
Os03g0147400	4.44e-119	2.02295	0.816	0.072	9.65e-115	7	Z3	zebra3	Putative citrate transporter, Citrate-metal hydrogen symport (CitMHS) family protein, Citrate transport and distribution during leaf development	29305728
Os06g0118700	3.79e-112	0.531668	0.197	0.001	8.23e-108	7			Peptidase A1 domain containing protein.
Os02g0276900	4.51e-107	0.350662	0.171	0.001	9.79e-103	7			Basic helix-loop-helix dimerisation region bHLH domain containing protein.
Os08g0482700	1.71e-100	1.00512	0.487	0.026	3.72e-96	7			Cupredoxin domain containing protein.
Os06g0624900	3.87e-98	0.792864	0.316	0.009	8.42e-94	7			Similar to zinc-binding family protein.
Os01g0935400	1.91e-97	0.393283	0.184	0.002	4.14e-93	7			2OG-Fe(II) oxygenase domain containing protein.
Os01g0886200	4.26e-90	0.820835	0.368	0.016	9.26e-86	7			Similar to AGAMOUS homolog.
Os08g0529000	3.75e-82	0.394164	0.145	0.001	8.16e-78	7	PIN5B, PIN5C, OsPIN5c, OsPIN5b	PIN PROTEIN 5B, PIN PROTEIN 5C	Auxin efflux carrier, Auxin homeostasis, transport and distribution	26213119
Os11g0121300	8.02e-81	0.270788	0.197	0.003	1.74e-76	7			Conserved hypothetical protein.
Os12g0207000	2.83e-75	0.612009	0.368	0.02	6.14e-71	7	OsMADS13	MADS-box transcription factor 13	Floral homeotic gene, Ortholog of Arabidopsis STK (SEEDSTICK), Specification of flower organ identity and meristem determinacy	21784949, 21444646
Os08g0135400	8.91e-73	0.394483	0.276	0.01	1.94e-68	7			Copine domain containing protein.
Os03g0747900	1.37e-71	0.41972	0.289	0.012	2.98e-67	7	OsMyoXIE-1, OsMyoXIE	Myosin XIE-1, Myosin XIE	Myosin heavy chain class XI E1 protein	15169941
Os05g0230700	1.59e-67	0.875721	0.447	0.036	3.46e-63	7			Similar to Auxin-responsive protein IAA17.
Os03g0212300	4.49e-67	0.282432	0.197	0.005	9.75e-63	7			Transcriptional factor B3 family protein.
Os03g0843100	9.19e-66	0.300935	0.171	0.003	2e-61	7			Ras GTPase family protein.
Os03g0802600	6.91e-64	0.498358	0.289	0.014	1.5e-59	7			ATPase, AAA-type, core domain containing protein.
Os04g0599650	3.67e-63	0.522003	0.224	0.008	7.97e-59	7			DNA helicase, UvrD/REP type domain containing protein.
Os12g0576100	3.73e-63	0.507952	0.224	0.008	8.1e-59	7			Conserved hypothetical protein.
Os02g0661100	9.24e-62	0.354478	0.211	0.007	2.01e-57	7	OsTPP1	Trehalose-6-phosphate phosphatase 1	Trehalose-6-phosphate phosphatase, Trehalose biosynthesis, Chilling tolerance	29257952, 16240171, DOI:10.5511/plantbiotechnology.11.0421a
Os04g0691100	8.37e-56	0.517651	0.303	0.019	1.82e-51	7	SAPK5, OsSAPK5	STRESS/ABA-ACTIVATED PROTEIN KINASE 5, stress/ABA-activated protein kinase 5, Stress-Activated Protein Kinase 5	Serine/threonine protein kinase, Hyperosmotic stress response	15084714
Os02g0132500	9.97e-56	0.356229	0.197	0.007	2.17e-51	7			Similar to Common plant regulatory factor 7.
Os02g0631200	1.05e-54	0.511177	0.329	0.023	2.29e-50	7			Homeodomain-like containing protein.
Os01g0778800	3.48e-53	0.753633	0.303	0.02	7.56e-49	7			Peptidase M16, core domain containing protein.
Os01g0971100	3.2e-49	0.524504	0.355	0.031	6.95e-45	7	OsDi19-5	drought-induced protein 19-5	Drought-induced protein family 19-5, Negative regulation of salt stress tolerance	33179343
Os04g0526800	7.45e-47	0.274994	0.211	0.01	1.62e-42	7	OsABAR1	ABA-responsive protein-like protein 1	Glucosyltransferases-like GTPase activators and Myotubularin (GRAM) domain-containing protein, Drought and salt tolerance, Regulationof the ABA pathway	32416343
Os03g0762500	1.48e-46	0.655536	0.342	0.03	3.22e-42	7			Conserved hypothetical protein.
Os04g0413500	2.66e-46	0.855649	0.211	0.01	5.78e-42	7	GIF1, gif1, CIN2, OsCIN2, OsGIF1, WB1	GRAIN INCOMPLETE FILLING 1, grain incomplete filling 1, "Beta-fructofuranosidase, insoluble isoenzyme 2", Sucrose hydrolase 2, Invertase 2, Cell wall beta-fructosidase 2, cell-wall invertase 2, White Belly 1	Cell-wall invertase, Carbon partitioning during early grain filling, Regulation of endosperm development	30042352, 18820698, 15759120
Os02g0687200	4.02e-43	0.314006	0.145	0.005	8.74e-39	7			Protein of unknown function DUF581 family protein.
Os07g0194100	7.27e-42	0.302204	0.224	0.013	1.58e-37	7			Similar to OSK2 (Fragment).
Os09g0507200	4.77e-41	0.596349	0.342	0.035	1.04e-36	7	OsMADS8, OsMADS8/24, DTE9	MADS-domain transcription factor 8, dark tip embryo 9	MADS-box transcription factor 8, Floral organ determination, Seed germination, ABA signaling and catabolism, Hybrid weakness	35069634, 19561057
Os05g0518600	1.03e-40	0.62193	0.276	0.022	2.25e-36	7	OsTPS1	trehalose-6-phosphate synthase 1	Trehalose-6-phosphate synthase, Abiotic stress tolerance	21698458, 21598083
Os01g0679900	6.39e-39	0.66409	0.474	0.07	1.39e-34	7			Similar to Ythdf2-prov protein.
Os08g0535200	2.48e-38	1.81019	0.447	0.066	5.39e-34	7	Os8N3, OsSWEET11, xa13, xa13/Os8N3		Sugar transporter, A member of the MtN3 gene family, Host disease-susceptibility gene for bacterial blight	31446506, 16798873
Os02g0216300	3.2e-38	0.633783	0.237	0.017	6.96e-34	7			Similar to cDNA clone:J023088C01, full insert sequence.
Os07g0209100	8.75e-37	0.781102	0.184	0.01	1.9e-32	7			Similar to Seed imbibition protein (Fragment).
Os01g0142500	1.15e-35	0.329651	0.211	0.014	2.5e-31	7			Homeodomain-like containing protein.
Os02g0689900	2.79e-34	0.252384	0.118	0.004	6.07e-30	7			TGF-beta receptor, type I/II extracellular region family protein.
Os02g0735200	1.73e-33	0.650351	0.355	0.046	3.77e-29	7	OsGS1;1	cytosolic glutamine synthetase 1;1	Cytosolic glutamine synthetase, Growth rate, Grain filling	24743556, 15918879
Os01g0575200	8.31e-33	0.304818	0.171	0.01	1.81e-28	7			Helix-loop-helix DNA-binding domain containing protein.
Os05g0209600	1.69e-31	0.340118	0.145	0.007	3.68e-27	7	OsGELP63	GDSL esterase/lipase protein 63	GDSL esterase/lipase protein	22793791, 15359122
Os08g0503000	2.08e-31	0.513652	0.118	0.005	4.52e-27	7			Hypothetical protein.
Os08g0462900	2.58e-31	0.374824	0.118	0.005	5.62e-27	7			Protein of unknown function DUF716 family protein.
Os08g0409100	2.81e-31	0.258525	0.171	0.011	6.1e-27	7			Trehalose-6-phosphate phosphatase.
Os08g0428400	3.05e-29	0.319053	0.171	0.012	6.63e-25	7			Tify domain containing protein.
Os02g0247000	2e-28	0.279364	0.132	0.007	4.35e-24	7			Protein of unknown function DUF605 domain containing protein.
Os03g0764600	2.2e-28	0.558979	0.289	0.036	4.78e-24	7			Homeodomain-like containing protein.
Os02g0729700	5.32e-28	0.411896	0.303	0.039	1.16e-23	7			Similar to HAHB-7 (Fragment).
Os01g0550300	1.35e-27	0.660127	0.434	0.081	2.93e-23	7			Similar to Gda-1 protein.
Os01g0922800	2.71e-27	0.250262	0.184	0.015	5.89e-23	7	MADS51, OsMADS51, OsMADS65, MADS65	MADS BOX GENE 51, MADS box gene51	MADS-box transcription factor, Short-day flowering promoter	10382970, 17951465
Os03g0743500	6.58e-26	0.442681	0.184	0.016	1.43e-21	7			Calcium-binding EF-hand domain containing protein.
Os07g0621500	1.45e-25	0.309063	0.197	0.018	3.15e-21	7			Similar to predicted protein.
Os03g0203200	4.29e-23	0.388153	0.276	0.039	9.32e-19	7	D14, d14(d10), dwf13, d10, d14, D88, HTD2, OsD14, qPPB3, D88/D14	DWARF KAMIKAWABUNWAI TILLERING, kamikawabunwai tillering dwarf, dwarf-14, DWARF14, dwarf 14, Dwarf 88, HIGH-TILLERING DWARF 2, Primary panicle branch number 3	Alpha/beta hydrolase, Strigolactone receptor, Strigolactone perception, Reguration of shoot branching	24616269, 19542179
Os03g0751600	6.48e-22	0.515676	0.342	0.064	1.41e-17	7			Similar to Circumsporozoite protein.
Os04g0685400	2.2e-21	0.281887	0.211	0.025	4.78e-17	7			Harpin-induced 1 domain containing protein.
Os08g0441500	5.58e-21	0.580153	0.211	0.026	1.21e-16	7	OsCCR, CCR, OsCCR14, OsCCR20	cinnamoyl-CoA reductase	Cinnamoyl-CoA reductase, Lignin formation	29295941
Os02g0703600	2.92e-20	0.415893	0.263	0.041	6.34e-16	7	OsABA8ox1, CYP707A5	ABA 8'-hydroxylase 1	ABA 8'-hydroxylase, Response to submergence	17205969
Os09g0306400	1.23e-19	0.295707	0.197	0.024	2.66e-15	7	BZIP71, OsbZIP71	b-ZIP TRANSCRIPTION FACTOR 71, b-ZIP transcription factor 71	bZIP transcription factor, Drought and salt tolerance	23918260
Os01g0314800	6.08e-19	0.320987	0.158	0.016	1.32e-14	7			Late embryogenesis abundant protein 3 family protein.
Os03g0224300	6.1e-19	0.251129	0.158	0.016	1.33e-14	7			HAD-superfamily hydrolase subfamily IIB protein.
Os03g0243100	6.36e-19	0.281887	0.197	0.025	1.38e-14	7			Similar to Actin-depolymerizing factor 5 (ADF-5) (AtADF5).
Os04g0461600	9.7e-19	0.288861	0.184	0.022	2.11e-14	7			Similar to Fw2.2.
Os03g0121200	1.86e-18	0.504968	0.316	0.063	4.05e-14	7			Similar to Peroxidase 1.
Os03g0142800	6.36e-18	0.725873	0.395	0.1	1.38e-13	7	OsMRP5	multidrug resistance-associated protein 5	Multidrug resistance-associated protein (MRP) ATP-binding cassette (ABC) transporter, Rice orthologue of the maize Lpa1 gene, Phytic acid metabolism	19370321
Os01g0877600	2.12e-17	0.444527	0.342	0.077	4.6e-13	7			Hypothetical protein.
Os07g0685700	4.95e-17	0.269198	0.171	0.021	1.08e-12	7	EIL2, OsEIL2	ETHYLENE INSENSITIVE-LIKE GENE 2, EIN3-like protein 2, ETHYLENE INSENSITIVE3-LIKE 2, EIN3-LIKE 2	Transcription factor, Response to ethylene stimulus, Wound signaling	22977279, 19798512
Os08g0531700	2.88e-16	0.340908	0.25	0.045	6.27e-12	7	OsMADS7	MADS-box transcription factor 7	MADS-box transcription factor, Regulation of floral identity, Regulation of amylose content at high temperature	28429576, 20003164
Os02g0666200	6.19e-16	0.304665	0.197	0.03	1.35e-11	7	OsPIP1;1, RWC1	plasma membrane intrinsic protein 1;1	Aquaporin, Water channel, Salt tolerance, Seed germination, Response to osmotic and chilling stress	23262183, 20926385
Os03g0760800	4.42e-15	0.401828	0.237	0.044	9.6e-11	7	GASR1, OsGASR1	GA Stimulated Rice 1, GA-stimulated transcript-related gene 1	A member of the GAST (gibberellin (GA)-Stimulated Transcript) family, Control of seedling growth and &alpha;-amylase expression, Cell proliferation in meristems and panicles development	28482332, 16905871
Os01g0384800	3.11e-13	0.297848	0.197	0.035	6.75e-09	7			Conserved hypothetical protein.
Os03g0583900	5.21e-13	0.412181	0.197	0.036	1.13e-08	7	OsDCL2	Dicer-like protein 2	Dicer-like protein, Component of RNA silencing machinery, Involved in endogenous dsRNA virus propagation	19933266
Os06g0157000	5.84e-12	0.367949	0.263	0.064	1.27e-07	7			Esterase, SGNH hydrolase-type domain containing protein.
Os03g0582000	8.47e-12	0.290217	0.197	0.039	1.84e-07	7			Similar to Glutamate formiminotransferase.
Os01g0739500	1.66e-11	0.26138	0.171	0.03	3.61e-07	7			Conserved hypothetical protein.
Os09g0551600	4.78e-11	0.286746	0.25	0.061	1.04e-06	7			Similar to HMGd1 protein (Nucleasome/chromatin assembly factor D protein NFD101).
Os05g0119100	6.37e-11	0.518965	0.158	0.028	1.38e-06	7			Hypothetical protein.
Os11g0210300	9.51e-11	0.347921	0.237	0.059	2.07e-06	7			Alcohol dehydrogenase 1.
Os04g0560700	1.36e-10	0.34248	0.197	0.043	2.96e-06	7			Conserved hypothetical protein.
Os02g0687500	1.5e-10	0.252049	0.145	0.024	3.27e-06	7			Similar to S-ribonuclease binding protein SBP1.
Os07g0583600	1.88e-10	0.285812	0.237	0.059	4.08e-06	7	CIGR2	chitin-inducible gibberellin-responsive protein 2	GRAS family protein, Transcriptional activator, N-acetylchitooligosaccharide elicitor-responsive protein, Pathogen-induced defense response, Plant immune signaling	26287768, 12591613
Os01g0717000	2.04e-10	0.415771	0.289	0.083	4.43e-06	7			Similar to GmCK1p (EC 2.7.1.32).
Os02g0696500	2.61e-10	0.27382	0.211	0.048	5.66e-06	7			Concanavalin A-like lectin/glucanase domain containing protein.
Os03g0701800	3.54e-10	0.253831	0.197	0.044	7.69e-06	7	OsPIPK1	rice phosphatidylinositol monophosphate kinase 1, phosphatidylinositol 4-phosphate 5-kinase 1	Phosphatidylinositol 4-phosphate 5-kinase, Regulation of heading, Regulation of floral induction genes	15159629
Os03g0388500	9.39e-10	0.265762	0.145	0.026	2.04e-05	7			Similar to Anther ethylene-upregulated protein ER1 (Fragment).
Os05g0366900	1.07e-09	0.258914	0.145	0.027	2.32e-05	7			Conserved hypothetical protein.
Os04g0547900	2.54e-09	0.332892	0.171	0.038	5.53e-05	7			Anti-sense to fibroblast growth factor protein GFG family protein.
Os03g0333700	4.06e-09	0.269359	0.184	0.043	8.82e-05	7			Conserved hypothetical protein.
Os02g0822400	4.71e-09	0.27716	0.289	0.091	0.000102321	7			No apical meristem (NAM) protein domain containing protein.
Os02g0437200	9.26e-09	0.320461	0.211	0.056	0.000201229	7	OsSNAP32	Synaptosome-associated protein of 32 kDa, Synaptosomal-associated protein 32	SNAP25-type SNARE protein, Rice blast resistance	30617050, 17380428, DOI:10.1007/s10725-016-0152-4
Os09g0424300	1.51e-08	0.426706	0.158	0.035	0.000327184	7			S-adenosylmethionine decarboxylase.
Os01g0764000	7.26e-08	0.270063	0.197	0.054	0.00157738	7			Similar to Glutathione S-transferase I (EC 2.5.1.18) (GST-I) (GST-29) (GST class- phi).
Os10g0555900	1.36e-07	0.282924	0.184	0.049	0.00294461	7	OsEXPB3	&beta;-Expansin 3, beta-expansin 3	Beta-expansin 3	16258250
Os09g0484200	1.48e-07	0.419818	0.224	0.07	0.00322082	7			Hypothetical protein.
Os10g0389000	1.64e-07	0.279685	0.184	0.05	0.00355433	7			Centrin.
Os01g0757200	2.82e-07	0.266191	0.105	0.019	0.00612216	7	GA2OX3, OsGA2ox3, ga2ox 3, OsGA2ox-3, GA2ox3, GA2ox-3	GIBBERELLIN 2-OXIDASE 3, rice GA 2-oxidase3, GA 2-oxidase 3, Gibberellin 2-oxidase 3	GA 2-oxidase3, GA metabolism	12736788, 15075394
Os08g0268000	5.48e-07	0.589259	0.197	0.061	0.0119143	7			Conserved hypothetical protein.
Os05g0491100	6.83e-06	0.359023	0.25	0.099	0.148312	7			Similar to Calmodulin.
Os05g0111300	7.15e-05	0.640497	0.197	0.079	1	7	OsMT2b	METALLOTHIONEIN2b	Metallothionein, Reactive oxygen species (ROS) scavenger protein, Root development and seed embryo germination, Distribution of Zn to grain	32772382, 31004187, 18258694, 15220467
Os04g0527000	0.00139914	0.287055	0.184	0.084	1	7			GRAM domain containing protein.
Os10g0340600	1.5e-219	1.05901	0.519	0.006	3.27e-215	8			Similar to Beta-galactosidase.
Os02g0170300	2.77e-199	0.934681	0.462	0.005	6.02e-195	8	MADS29, OsMADS29	MADS BOX GENE 29, MADS box gene29, MADS-box transcription factor 29	MADS box transcription factor, Regulator of early seed development	22408076
Os01g0177900	1.98e-193	1.38654	0.808	0.026	4.3e-189	8	PDR6, OsPDR6, OsABCG31, OsABCG31_1	PLEIOTROPIC DRUG RESISTANCE 6, sativa pleiotropic drug resistance 6, Pleiotropic drug resistance protein 6, ABC transporter superfamily ABCG subgroup member 31	ATP-binding cassette transporter, Cuticle formation, Defense response	27121976, 12644668
Os04g0465600	2.81e-192	2.45405	0.923	0.037	6.12e-188	8			Bet v I allergen family protein.
Os05g0356700	1.94e-169	0.882487	0.519	0.01	4.22e-165	8			Protein of unknown function DUF231, plant domain containing protein.
Os10g0478500	3.86e-162	0.796444	0.442	0.007	8.39e-158	8			MATH domain containing protein.
Os01g0151700	4.75e-156	0.808737	0.481	0.009	1.03e-151	8			Similar to Short-chain dehydrogenase Tic32.
Os10g0150800	1.34e-147	1.04903	0.519	0.012	2.91e-143	8			Protein of unknown function DUF1210 family protein.
Os11g0210100	1.51e-141	0.795574	0.423	0.008	3.29e-137	8			Similar to Class III peroxidase 133.
Os10g0463200	2.93e-138	1.62762	0.577	0.018	6.37e-134	8			Esterase, SGNH hydrolase-type domain containing protein.
Os02g0211000	1.05e-135	0.562846	0.288	0.002	2.29e-131	8			Conserved hypothetical protein.
Os06g0132500	2.15e-105	0.589823	0.346	0.007	4.68e-101	8	OsBDG	BODYGUARD	Control of wax biosynthesis	29237723
Os01g0728100	3.06e-105	0.405896	0.212	0.002	6.66e-101	8			Lipase, GDSL domain containing protein.
Os10g0148100	5.39e-101	1.26042	0.615	0.032	1.17e-96	8	OsPRP3	Proline-Rich Protein 3	Flower specific proline-rich protein, Determination of extracellular matrix structure of floral organs, Cold tolerance	19830390
Os02g0575200	1.29e-99	0.557176	0.288	0.005	2.8e-95	8			DNA/pantothenate metabolism flavoprotein, C-terminal domain containing protein.
Os07g0525100	2.55e-94	0.275526	0.173	0.001	5.54e-90	8	OsCLIP	OsCOLE1-INTERACTING PROTEIN	Putative integral membrane protein containing EamA-like transporter family domains, Regulation of intracellular auxin transport	27265035
Os03g0149300	2.37e-93	0.532668	0.288	0.005	5.16e-89	8			Protein of unknown function DUF6, transmembrane domain containing protein.
Os09g0132900	6.84e-93	0.401528	0.269	0.005	1.49e-88	8			Lipase, GDSL domain containing protein.
Os06g0604000	7.63e-92	0.438396	0.308	0.007	1.66e-87	8	OsWR2	Wax Synthesis Regulatory 2	WIN1/SHN1 homolog, Transcription factor, Regulation of wax and cutin biosynthesis, Control of cuticle permeability, Drought tolerance	DOI:10.1007/s11105-013-0687-8
Os07g0683600	2.32e-91	0.475867	0.327	0.008	5.03e-87	8	OsEULD2	Euonymus lectin D2	D-type euonymus-related lectin (EUL), "Response to salt and drought stress, hormone treatment", Response to biotic treatment	32194594
Os06g0148200	1.08e-89	0.694999	0.327	0.008	2.34e-85	8			Lipase, GDSL domain containing protein.
Os09g0323500	6.25e-88	0.708406	0.346	0.01	1.36e-83	8			Protein of unknown function DUF833 family protein.
Os06g0496800	1.37e-85	0.598453	0.385	0.013	2.97e-81	8	MAK6	Membrane-associated kinase-6	Membrane-associated kinase-6, Response to submergence	33777532
Os09g0403000	3.97e-72	0.438831	0.25	0.006	8.62e-68	8			Hypothetical conserved gene.
Os06g0156700	4.95e-71	1.71159	0.5	0.032	1.07e-66	8	OsGLIP2	GDSL lipase 2	GDSL lipase, Negative regulation of disease resistance	29131851
Os05g0357500	2.63e-70	0.295623	0.173	0.002	5.72e-66	8			Similar to Integral membrane protein DUF6 containing protein, expressed.
Os10g0198900	1.71e-69	0.381339	0.212	0.004	3.72e-65	8			Drug/metabolite transporter domain containing protein.
Os06g0553200	5.94e-61	1.57079	0.654	0.068	1.29e-56	8			Similar to Meiosis 5.
Os06g0156600	4.75e-60	0.448176	0.308	0.012	1.03e-55	8			Lipase, GDSL domain containing protein.
Os05g0366900	1.29e-58	0.521913	0.404	0.023	2.81e-54	8			Conserved hypothetical protein.
Os04g0560100	1.11e-57	0.397608	0.231	0.007	2.4e-53	8			Cytochrome P450 family protein.
Os09g0484200	2.37e-48	1.17861	0.577	0.065	5.16e-44	8			Hypothetical protein.
Os03g0808500	3.43e-48	0.785391	0.423	0.033	7.46e-44	8			Plant lipid transfer protein/Par allergen family protein.
Os02g0809800	2.11e-47	0.512858	0.308	0.017	4.6e-43	8	PHO1;2, OsPHO1;2	PHOSPHATE TRANSPORTER 1;2, PHOSPHATE1;2	Phosphate (Pi) transporter, Root-to-shoot Pi transfer	20081045
Os02g0232900	2.63e-46	0.26854	0.173	0.005	5.71e-42	8	OsNIP1;1	Nodulin26-like Intrinsic Protein 1;1	A member of the Nodulin26-like Intrinsic Protein (NIP) family, Arsenite transporter	29749629
Os02g0809500	9.82e-44	0.743023	0.481	0.047	2.13e-39	8	OsSEC24		Functional SEC24-like protein, Coat protein, Tolerance to iron deficiency and high pH by enhancing H<sup>+</sup>secretion	25711814
Os02g0693700	1.98e-42	0.267234	0.192	0.007	4.31e-38	8			Hypothetical conserved gene.
Os08g0535200	3.37e-40	1.46581	0.538	0.067	7.32e-36	8	Os8N3, OsSWEET11, xa13, xa13/Os8N3		Sugar transporter, A member of the MtN3 gene family, Host disease-susceptibility gene for bacterial blight	31446506, 16798873
Os01g0201700	6.56e-40	0.345204	0.25	0.013	1.43e-35	8	RAG, MADS3, OsMADS3, OsMADS3(t), RMADS222, RAG1	RICE AGAMOUS, MADS box gene3, MADS-box transcription factor 3, Protein AGAMOUS-like	Transcription factor, Floral organ development, Lodicule development, Stamen specification, Floral meristem determinacy, Male reproductive development	21297036, 16326928, 11828031, 7579155
Os05g0426400	2.39e-38	0.460756	0.288	0.019	5.2e-34	8			Glycosyl transferase, family 8 domain containing protein.
Os01g0598600	3.38e-38	0.766516	0.442	0.046	7.35e-34	8			Peptidase A1 domain containing protein.
Os03g0418700	9.16e-38	0.271592	0.135	0.003	1.99e-33	8	SLG7-L1	SLG7-like1, Slender grain on chromosome 7-like 1	SLG7-like protein, Regulation of grain shape	26434724
Os12g0102300	3.73e-37	0.552126	0.269	0.017	8.11e-33	8			Similar to WRKY transcription factor 57.	Rice WRKY Working Group 2012. Rice 5:3.
Os04g0460600	1.13e-36	0.681596	0.365	0.032	2.46e-32	8	NAC2, OsNAC2, ONAC004, ONAC4, ONAC034, ONAC34, ONAC058, ONAC58, OMTN2, Ostil1, OsNAC2/ONAC004, OsORE1.2	NAC DOMAIN-CONTAINING PROTEIN 2, NAC domain-containing protein 004, NAC domain-containing protein 4, NAC domain-containing protein 34, NAC domain-containing protein 58, miR164-targeted NAC2, Oryza miR164-targeted NAC2, Oryza sativa tillering1, ORESARA 1.2	NAC transcription factor, Regulation of shoot branching, plant height and flowering time	25754802, 17888111
Os09g0507200	3.52e-35	0.476952	0.385	0.036	7.65e-31	8	OsMADS8, OsMADS8/24, DTE9	MADS-domain transcription factor 8, dark tip embryo 9	MADS-box transcription factor 8, Floral organ determination, Seed germination, ABA signaling and catabolism, Hybrid weakness	35069634, 19561057
Os12g0239300	4.96e-35	0.267234	0.154	0.005	1.08e-30	8			Similar to Mov34/MPN/PAD-1 family protein.
Os11g0115100	1.78e-34	0.561458	0.308	0.024	3.88e-30	8			Similar to Lipid transfer protein.
Os07g0638100	3.1e-34	0.40624	0.25	0.016	6.73e-30	8			Six-bladed beta-propeller, TolB-like domain containing protein.
Os03g0220100	6.32e-32	0.279547	0.212	0.012	1.37e-27	8	WSL4, CER6/CUT1, CER6, CUT1, OsCER6	wax crystal-sparse leaf 4, eceriferum6, eceriferum 6, cuticular 1	beta-ketoacyl-CoA synthase, Homolog of Arabidopsis CER6, Leaf cuticular wax synthesis, Very-long-chain fatty acid (VLCFA) elongation	27913740
Os03g0255100	2.73e-30	0.324805	0.192	0.01	5.94e-26	8			Similar to Relative to SR12 protein (Fragment).
Os03g0284700	3.88e-28	0.26854	0.135	0.005	8.43e-24	8			Conserved hypothetical protein.
Os03g0231800	4.79e-27	0.318335	0.231	0.017	1.04e-22	8			Similar to Squalene monooxygenase 1 (EC 1.14.99.7).
Os01g0761300	5.62e-27	0.401903	0.308	0.031	1.22e-22	8			Similar to Long-chain-fatty-acid-CoA ligase-like protein.
Os04g0547900	2.29e-26	0.560581	0.327	0.036	4.98e-22	8			Anti-sense to fibroblast growth factor protein GFG family protein.
Os12g0114800	2.35e-26	0.346068	0.192	0.012	5.1e-22	8			Similar to Lipid transfer protein.
Os09g0423800	1.88e-25	0.299324	0.212	0.015	4.09e-21	8			Similar to AP2-1 protein (Fragment).
Os10g0363300	3.74e-25	0.308042	0.25	0.022	8.13e-21	8	ACC1	Acetyl-CoA carboxylase 1	Acetyl-CoA carboxylase (EC 6.4.1.2)
Os08g0525700	1.53e-24	0.261587	0.173	0.011	3.32e-20	8			Conserved hypothetical protein.
Os05g0397300	3.98e-24	0.314857	0.288	0.03	8.66e-20	8			Conserved hypothetical protein.
Os03g0758500	5.15e-23	0.434667	0.404	0.061	1.12e-18	8			Cupredoxin domain containing protein.
Os08g0559800	1.16e-22	0.334348	0.115	0.005	2.53e-18	8			Hypothetical conserved gene.
Os12g0566700	2.57e-22	0.419116	0.269	0.029	5.59e-18	8			Lipase, GDSL domain containing protein.
Os04g0614700	4.14e-22	0.362801	0.269	0.029	8.99e-18	8			Similar to OSIGBa0126B18.8 protein.
Os03g0120200	5.24e-22	0.298462	0.192	0.015	1.14e-17	8			Remorin, C-terminal region domain containing protein.
Os01g0560000	2.74e-21	0.371721	0.308	0.039	5.96e-17	8			Similar to Auxin amidohydrolase.
Os06g0115000	6.43e-21	0.37177	0.154	0.01	1.4e-16	8			Conserved hypothetical protein.
Os05g0203800	1.61e-19	0.306334	0.212	0.02	3.51e-15	8	MADS58, OsMADS58	MADS BOX GENE 58, MADS box gene58, MADS box gene 58, MADS-box transcription factor 58	Transcription factor, Floral organ development	16326928
Os02g0626400	1.06e-18	0.86619	0.462	0.1	2.3e-14	8			Phenylalanine ammonia-lyase (EC 4.3.1.5).
Os04g0691100	3.23e-18	0.328456	0.212	0.022	7.03e-14	8	SAPK5, OsSAPK5	STRESS/ABA-ACTIVATED PROTEIN KINASE 5, stress/ABA-activated protein kinase 5, Stress-Activated Protein Kinase 5	Serine/threonine protein kinase, Hyperosmotic stress response	15084714
Os03g0687000	4.75e-18	0.566306	0.462	0.098	1.03e-13	8	OsNPF2.4, NPF2.4, OsPTR2, PTR2	NRT1/PTR family 2.4, NO3-/peptide transporter family 2.4	Nitrate transporter, Peptide transporter, osa-miR168a target gene, Acquisition and long-distance transport of nitrate, Regulation of seed vigor	30791202, 25332358
Os02g0469600	5.48e-18	0.295278	0.25	0.031	1.19e-13	8	OsACP1	abiotic stress-induced cysteine proteinase 1	Abiotic stress-induced cysteine proteinase, Abiotic stress response	32206999
Os01g0140100	8.41e-18	0.254668	0.173	0.015	1.83e-13	8			Peptidase A1 domain containing protein.
Os10g0510500	2.92e-17	0.307615	0.212	0.023	6.35e-13	8			Auxin responsive SAUR protein family protein.
Os03g0685300	7.52e-17	0.621823	0.308	0.051	1.63e-12	8			Glutamine amidotransferase class-I domain containing protein.
Os04g0616400	1.03e-16	0.386961	0.212	0.024	2.23e-12	8			Similar to H0525G02.12 protein.
Os08g0398000	1.32e-16	0.252082	0.173	0.016	2.87e-12	8			ABC transporter-like domain containing protein.
Os09g0439100	4.36e-16	0.383369	0.288	0.046	9.48e-12	8			Similar to ATCSLA09.
Os05g0537300	2.68e-15	0.277819	0.154	0.014	5.82e-11	8			Similar to Unconventional myosin heavy chain.
Os04g0685400	3.62e-15	0.27962	0.212	0.026	7.86e-11	8			Harpin-induced 1 domain containing protein.
Os01g0498200	9.31e-15	0.31149	0.288	0.048	2.02e-10	8			Conserved hypothetical protein.
Os02g0626100	1.24e-14	0.504277	0.423	0.1	2.69e-10	8			Similar to Phenylalanine ammonia-lyase.
Os07g0693500	1.35e-14	0.383787	0.269	0.043	2.92e-10	8			Similar to AMP deaminase 2 (EC 3.5.4.6) (AMP deaminase isoform L). Splice isoform Ex1A-3.
Os01g0300200	1.7e-14	0.464115	0.25	0.039	3.7e-10	8			Similar to ATP-citrate lyase subunit B.
Os03g0327800	2.62e-14	0.385882	0.25	0.039	5.68e-10	8	NAC58, OsNAP, ONAC058, ONAC58, PS1	NAC DOMAIN-CONTAINING PROTEIN 58, NAC Family Transcription Factor OsNAP, NAC domain-containing protein 058, NAC domain-containing protein 58, prematurely senile 1	NAC Family transcriptional activator, Abiotic stress response, Positive regulator of leaf senescence	24399239, 24028154
Os03g0817700	4.83e-14	0.278769	0.192	0.024	1.05e-09	8			Hypothetical conserved gene.
Os09g0501600	1.46e-13	0.27622	0.192	0.025	3.17e-09	8			Similar to MYC1.
Os02g0513100	2.04e-13	0.395324	0.269	0.046	4.42e-09	8	OsSWEET15	Sugars Will Eventually be Exported Transporter 15	Clade III SWEET transporter, Sucrose transporter, Regulation of sucrose transport in response to drought and salt stress, TAL effector-mediated susceptibility to bacterial pathogen	32940908, 23879865
Os05g0437800	2.35e-13	0.306761	0.192	0.025	5.11e-09	8			Conserved hypothetical protein.
Os02g0109800	1.38e-12	0.266642	0.173	0.022	3.01e-08	8			Tetratricopeptide-like helical domain containing protein.
Os09g0456100	1.65e-12	0.343864	0.192	0.027	3.58e-08	8	LP1	LONG PANICLE 1	Remorin_C-containing protein, Control of panicle length	27200064
Os03g0278000	1.78e-12	0.345019	0.288	0.056	3.86e-08	8	OsUXS3	UDP-xylose synthase 3	UDP-glucuronic acid decarboxylase	15488465
Os01g0937400	2.22e-12	0.332552	0.269	0.049	4.83e-08	8			NB-ARC domain containing protein.
Os05g0349200	3.24e-12	0.352063	0.269	0.05	7.05e-08	8			Similar to AMP deaminase 1 (EC 3.5.4.6) (Myoadenylate deaminase) (AMP deaminase isoform M).
Os03g0760800	7.36e-12	0.346259	0.25	0.045	1.6e-07	8	GASR1, OsGASR1	GA Stimulated Rice 1, GA-stimulated transcript-related gene 1	A member of the GAST (gibberellin (GA)-Stimulated Transcript) family, Control of seedling growth and &alpha;-amylase expression, Cell proliferation in meristems and panicles development	28482332, 16905871
Os06g0581000	9.6e-12	0.262793	0.173	0.023	2.09e-07	8			Similar to Nitrate transporter NTL1.
Os05g0405900	1.67e-11	0.300129	0.231	0.04	3.63e-07	8			WD40 repeat-like domain containing protein.
Os08g0482700	1.78e-11	0.287209	0.212	0.034	3.86e-07	8			Cupredoxin domain containing protein.
Os04g0689500	2.12e-11	0.277919	0.192	0.029	4.62e-07	8			Similar to H0814G11.12 protein.
Os01g0971100	4.32e-11	0.264384	0.212	0.035	9.38e-07	8	OsDi19-5	drought-induced protein 19-5	Drought-induced protein family 19-5, Negative regulation of salt stress tolerance	33179343
Os05g0132100	6.03e-11	0.295018	0.135	0.015	1.31e-06	8			AMP-dependent synthetase and ligase domain containing protein.
Os01g0944200	9.17e-11	0.465957	0.288	0.064	1.99e-06	8			Ribonuclease H-like domain containing protein.
Os08g0157500	7.71e-10	0.263963	0.192	0.033	1.68e-05	8	ROMT9, COMT, OsCOMT, ROMT-9, OsCOMT1, OsCAldOMT1, CAldOMT1, OsOMT	O-METHYLTRANSFERASE 9, Quercetin 3-O-methyltransferase 1, Flavonol 3-O-methyltransferase 1, caffeic acid 3-O-methyltransferase, caffeic acid O-methyltransferase 1, 5-hydroxyconiferaldehyde O-methyltransferase 1, 5-hydroxyconiferaldehyde OMT1, 5-HCAld OMT1	Caffeic acid O-methyltransferase, Flavonoid 3'-O-methyltransferase, Melatonin biosynthesis, Tricin biosynthesis	26276868, 26082402, 16412485
Os08g0265500	8.88e-10	0.301133	0.25	0.053	1.93e-05	8			Similar to ATPase.
Os03g0582000	9.65e-10	0.279691	0.212	0.04	2.1e-05	8			Similar to Glutamate formiminotransferase.
Os03g0359000	1.04e-09	0.262281	0.212	0.04	2.26e-05	8			Ubiquitin interacting motif domain containing protein.
Os01g0188400	1.77e-09	0.313987	0.231	0.048	3.85e-05	8	OschlME	plastidic NADP-ME	Plastidic NADP malic enzyme	15388961
Os05g0135700	6.34e-09	0.384834	0.308	0.084	0.000137729	8	OsSAMS1	S-Adenosyl-l-methionine synthetase 1	S-adenosyl-l-methionine synthetase, Essential for histone H3K4me3 and DNA methylation, Regulation of gene expression related to flowering, Regulation of leaf senescence and grain size	24144792, 21757254
Os03g0689300	2.31e-08	0.285894	0.308	0.085	0.000501371	8	OSA1	plasma membrane H<sup>+</sup>-ATPase 1	Plasma membrane H<sup>+</sup>-ATPase 1, Regulation of ammonium (NH<sub>4</sub><sup>+</sup>) uptake, Regulation of stomatal opening for C fixation, Control of photosynthesis	33531490
Os10g0420900	2.86e-08	0.26661	0.25	0.061	0.000621725	8			Conserved hypothetical protein.
Os08g0430700	2.97e-08	0.311918	0.288	0.078	0.000645679	8			Similar to UVB-resistance protein-like.
Os07g0481200	5.15e-08	0.368776	0.192	0.041	0.00111841	8			Similar to Calmodulin-binding heat-shock protein.
Os07g0694700	1.27e-07	0.253898	0.192	0.042	0.00275326	8	APX2, OsAPX2, APXb	ascorbate peroxidase 2	Ascorbate peroxidase, ROS homeostasis, Chloroplast protection, Carbohydrate metabolism, Plant architecture, Fertility maintenance	29549445, 23468992, 15685422
Os04g0560700	1.47e-07	0.914601	0.192	0.044	0.00319715	8			Conserved hypothetical protein.
Os01g0580200	1.71e-07	0.300308	0.231	0.059	0.00371009	8			Similar to Beta-galactosidase precursor (EC 3.2.1.23) (Lactase).
Os06g0700700	3.4e-07	0.394584	0.269	0.08	0.00737898	8	HMA2, OsHMA2, osHMA2	HEAVY METAL ATPASE 2, heavy metal ATPase 2, heavy metal transporter 2, heavy metal P-Type ATPase 2	P-Type heavy metal ATPase, Delivery of Zinc to developing tissues	23575418
Os04g0475600	9.29e-07	0.407419	0.25	0.074	0.0201954	8	DAO	dioxygenase for auxin oxidation	2-oxoglutarate-dependent-Fe (II) dioxygenase, Anther dehiscence, Pollen fertility, Seed initiation, Maintenance of auxin homeostasis in reproductive organs	24094741
Os03g0719300	9.69e-07	0.29167	0.231	0.063	0.0210471	8			Similar to Dihydroxyacetone/glycerone kinase-like protein.
Os02g0159200	1.76e-06	0.348633	0.231	0.067	0.0382348	8			Protein of unknown function DUF292, eukaryotic domain containing protein.
Os06g0157000	1.9e-06	0.433798	0.231	0.066	0.0412578	8			Esterase, SGNH hydrolase-type domain containing protein.
Os01g0960500	2.36e-06	0.276873	0.212	0.057	0.0512871	8			Zinc finger, RING/FYVE/PHD-type domain containing protein.
Os08g0478500	5.53e-06	0.282676	0.231	0.07	0.120135	8			Peptidase C19, ubiquitin carboxyl-terminal hydrolase 2 family protein.
Os03g0333700	7.69e-06	0.360813	0.173	0.044	0.167189	8			Conserved hypothetical protein.
Os01g0133500	1.02e-05	0.26427	0.192	0.053	0.222117	8			Beta-lactamase-like domain containing protein.
Os02g0167300	3.96e-05	0.252829	0.25	0.088	0.861012	8			Tubulin beta-3 chain (Beta-3 tubulin).
Os02g0244700	6e-05	0.268421	0.173	0.051	1	8	Osppc1	Phosphoenolpyruvate carboxylase 1	Phosphoenolpyruvate carboxylase, Nitrogen accumulation	25505033, 20194759, DOI:10.1017/S0960258513000354
Os10g0521600	9.65e-05	0.28011	0.154	0.044	1	8			Similar to Ankyrin-1 (Erythrocyte ankyrin).
Os02g0469300	0.000118164	0.254797	0.192	0.062	1	8			ATP-binding region, ATPase-like domain containing protein.
Os06g0303700	0.00484284	0.251707	0.212	0.1	1	8			Similar to Myb-like DNA-binding domain containing protein.
Os10g0470100	0.00707952	0.298606	0.173	0.076	1	8			Conserved hypothetical protein.
1 p-value, using a Wilcoxon Rank Sum test in each expressed genes pairs between two groups of cells.
2 log fold-chage of the average expression between the two groups. Positive values indicate that the gene is more highly expressed in the first group.
3 The percentage of cells where the gene is detected in the first group.
4 The percentage of cells where the gene is detected in the second group.
5 Adjusted p-value, based on bonferroni correction using all genes in the dataset.

## Sheet: Table S3
Table S3. Previously reported cell clusters specific expressed genes in embryo, endosperm and pericarp
gene	tissue
Os01g0101800	embryo
Os01g0113350	embryo
Os01g0119000	embryo
Os01g0127400	embryo
Os01g0127600	embryo
Os01g0147300	embryo
Os01g0170300	embryo
Os01g0205100	embryo
Os01g0259400	embryo
Os01g0260800	embryo
Os01g0263300	embryo
Os01g0268300	embryo
Os01g0274800	embryo
Os01g0275600	embryo
Os01g0312800	embryo
Os01g0326000	embryo
Os01g0329300	embryo
Os01g0332500	embryo
Os01g0511600	embryo
Os01g0514600	embryo
Os01g0516600	embryo
Os01g0535900	embryo
Os01g0643600	embryo
Os01g0663300	embryo
Os01g0700200	embryo
Os01g0723500	embryo
Os01g0725400	embryo
Os01g0726100	embryo
Os01g0737300	embryo
Os01g0741900	embryo
Os01g0777300	embryo
Os01g0813300	embryo
Os01g0814000	embryo
Os01g0852900	embryo
Os01g0857600	embryo
Os01g0859500	embryo
Os01g0876800	embryo
Os01g0878000	embryo
Os01g0896400	embryo
Os01g0899800	embryo
Os01g0922100	embryo
Os01g0936900	embryo
Os01g0937000	embryo
Os01g0959800	embryo
Os01g0976800	embryo
Os01g0977100	embryo
Os02g0168400	embryo
Os02g0179300	embryo
Os02g0183000	embryo
Os02g0189900	embryo
Os02g0190500	embryo
Os02g0197700	embryo
Os02g0198400	embryo
Os02g0215900	embryo
Os02g0221900	embryo
Os02g0226600	embryo
Os02g0228900	embryo
Os02g0237100	embryo
Os02g0256100	embryo
Os02g0312800	embryo
Os02g0315600	embryo
Os02g0321600	embryo
Os02g0326200	embryo
Os02g0450000	embryo
Os02g0512400	embryo
Os02g0513700	embryo
Os02g0526700	embryo
Os02g0533700	embryo
Os02g0537800	embryo
Os02g0555700	embryo
Os02g0558600	embryo
Os02g0574600	embryo
Os02g0592200	embryo
Os02g0638000	embryo
Os02g0640800	embryo
Os02g0643200	embryo
Os02g0667600	embryo
Os02g0673500	embryo
Os02g0698800	embryo
Os02g0745300	embryo
Os02g0761200	embryo
Os02g0762800	embryo
Os02g0763000	embryo
Os02g0765600	embryo
Os02g0774300	embryo
Os02g0785900	embryo
Os02g0794500	embryo
Os02g0817900	embryo
Os02g0818700	embryo
Os02g0819200	embryo
Os02g0824300	embryo
Os02g0828900	embryo
Os02g0829100	embryo
Os03g0100800	embryo
Os03g0114000	embryo
Os03g0128100	embryo
Os03g0128200	embryo
Os03g0134900	embryo
Os03g0144500	embryo
Os03g0161600	embryo
Os03g0198900	embryo
Os03g0218400	embryo
Os03g0219100	embryo
Os03g0244600	embryo
Os03g0253200	embryo
Os03g0259900	embryo
Os03g0264600	embryo
Os03g0271500	embryo
Os03g0277000	embryo
Os03g0292900	embryo
Os03g0294600	embryo
Os03g0294800	embryo
Os03g0297800	embryo
Os03g0304400	embryo
Os03g0319200	embryo
Os03g0320900	embryo
Os03g0327600	embryo
Os03g0337700	embryo
Os03g0352300	embryo
Os03g0394900	embryo
Os03g0401300	embryo
Os03g0416300	embryo
Os03g0563600	embryo
Os03g0616500	embryo
Os03g0622100	embryo
Os03g0646200	embryo
Os03g0684100	embryo
Os03g0699100	embryo
Os03g0699300	embryo
Os03g0708700	embryo
Os03g0722400	embryo
Os03g0725400	embryo
Os03g0728900	embryo
Os03g0736600	embryo
Os03g0747100	embryo
Os03g0762100	embryo
Os03g0770900	embryo
Os03g0783100	embryo
Os03g0784100	embryo
Os03g0784300	embryo
Os03g0793600	embryo
Os03g0795000	embryo
Os03g0804100	embryo
Os03g0861700	embryo
Os04g0128900	embryo
Os04g0129200	embryo
Os04g0132500	embryo
Os04g0228100	embryo
Os04g0233400	embryo
Os04g0261400	embryo
Os04g0268700	embryo
Os04g0298700	embryo
Os04g0375900	embryo
Os04g0376700	embryo
Os04g0379800	embryo
Os04g0382800	embryo
Os04g0403701	embryo
Os04g0463400	embryo
Os04g0465432	embryo
Os04g0469800	embryo
Os04g0472500	embryo
Os04g0479000	embryo
Os04g0486500	embryo
Os04g0486600	embryo
Os04g0494950	embryo
Os04g0522100	embryo
Os04g0549700	embryo
Os04g0553500	embryo
Os04g0553650	embryo
Os04g0572600	embryo
Os04g0585100	embryo
Os04g0602500	embryo
Os04g0642000	embryo
Os04g0659000	embryo
Os04g0687300	embryo
Os04g0689000	embryo
Os04g0690100	embryo
Os05g0105000	embryo
Os05g0120300	embryo
Os05g0169800	embryo
Os05g0170300	embryo
Os05g0203900	embryo
Os05g0210400	embryo
Os05g0220600	embryo
Os05g0241200	embryo
Os05g0323100	embryo
Os05g0370000	embryo
Os05g0387900	embryo
Os05g0409400	embryo
Os05g0411200	embryo
Os05g0449600	embryo
Os05g0454200	embryo
Os05g0468600	embryo
Os05g0481400	embryo
Os05g0489800	embryo
Os05g0506200	embryo
Os05g0507300	embryo
Os05g0516800	embryo
Os05g0518200	embryo
Os05g0530701	embryo
Os05g0531200	embryo
Os05g0531400	embryo
Os05g0573900	embryo
Os05g0574800	embryo
Os05g0589700	embryo
Os05g0595800	embryo
Os06g0110000	embryo
Os06g0112000	embryo
Os06g0115700	embryo
Os06g0141700	embryo
Os06g0145800	embryo
Os06g0147800	embryo
Os06g0152500	embryo
Os06g0155600	embryo
Os06g0172200	embryo
Os06g0176150	embryo
Os06g0177250	embryo
Os06g0211600	embryo
Os06g0234200	embryo
Os06g0285400	embryo
Os06g0297400	embryo
Os06g0311000	embryo
Os06g0318700	embryo
Os06g0474500	embryo
Os06g0478600	embryo
Os06g0497500	embryo
Os06g0507900	embryo
Os06g0530400	embryo
Os06g0543200	embryo
Os06g0556300	embryo
Os06g0564500	embryo
Os06g0589800	embryo
Os06g0597400	embryo
Os06g0619000	embryo
Os06g0621900	embryo
Os06g0624700	embryo
Os06g0625700	embryo
Os06g0634000	embryo
Os06g0643500	embryo
Os06g0656000	embryo
Os06g0657500	embryo
Os06g0658400	embryo
Os06g0677000	embryo
Os06g0680500	embryo
Os06g0683100	embryo
Os06g0692800	embryo
Os06g0704100	embryo
Os06g0714800	embryo
Os07g0123400	embryo
Os07g0154400	embryo
Os07g0207100	embryo
Os07g0260400	embryo
Os07g0272400	embryo
Os07g0408500	embryo
Os07g0507200	embryo
Os07g0517300	embryo
Os07g0574100	embryo
Os07g0618400	embryo
Os07g0640900	embryo
Os07g0656400	embryo
Os07g0661700	embryo
Os07g0677900	embryo
Os07g0685800	embryo
Os07g0687000	embryo
Os07g0688200	embryo
Os07g0693600	embryo
Os08g0101100	embryo
Os08g0117700	embryo
Os08g0119700	embryo
Os08g0148300	embryo
Os08g0167000	embryo
Os08g0177500	embryo
Os08g0197400	embryo
Os08g0205150	embryo
Os08g0250700	embryo
Os08g0253800	embryo
Os08g0267300	embryo
Os08g0275200	embryo
Os08g0332800	embryo
Os08g0346500	embryo
Os08g0365900	embryo
Os08g0400000	embryo
Os08g0432800	embryo
Os08g0433300	embryo
Os08g0439900	embryo
Os08g0452500	embryo
Os08g0484400	embryo
Os08g0499100	embryo
Os08g0512100	embryo
Os08g0515700	embryo
Os08g0528500	embryo
Os08g0537600	embryo
Os08g0552000	embryo
Os08g0561500	embryo
Os09g0101800	embryo
Os09g0103800	embryo
Os09g0327200	embryo
Os09g0363400	embryo
Os09g0375300	embryo
Os09g0382400	embryo
Os09g0396900	embryo
Os09g0410700	embryo
Os09g0424701	embryo
Os09g0454300	embryo
Os09g0479400	embryo
Os09g0488800	embryo
Os09g0500300	embryo
Os09g0504800	embryo
Os09g0518400	embryo
Os09g0532700	embryo
Os09g0539700	embryo
Os09g0542700	embryo
Os09g0556800	embryo
Os10g0104900	embryo
Os10g0147400	embryo
Os10g0351500	embryo
Os10g0437000	embryo
Os10g0444700	embryo
Os10g0452700	embryo
Os10g0462900	embryo
Os10g0498900	embryo
Os10g0524000	embryo
Os11g0114150	embryo
Os11g0118500	embryo
Os11g0130800	embryo
Os11g0137000	embryo
Os11g0156800	embryo
Os11g0158500	embryo
Os11g0173800	embryo
Os11g0184800	embryo
Os11g0208400	embryo
Os11g0221000	embryo
Os11g0245500	embryo
Os11g0247500	embryo
Os11g0421800	embryo
Os11g0427700	embryo
Os11g0580000	embryo
Os11g0673600	embryo
Os11g0676200	embryo
Os12g0113900	embryo
Os12g0115900	embryo
Os12g0116400	embryo
Os12g0120000	embryo
Os12g0125300	embryo
Os12g0127900	embryo
Os12g0128450	embryo
Os12g0131100	embryo
Os12g0174800	embryo
Os12g0224400	embryo
Os12g0256000	embryo
Os12g0263100	embryo
Os12g0267900	embryo
Os12g0273700	embryo
Os12g0279100	embryo
Os12g0416800	embryo
Os12g0510900	embryo
Os12g0533400	embryo
Os12g0547500	embryo
Os12g0553600	embryo
Os12g0555600	embryo
Os12g0568900	embryo
Os12g0569200	embryo
Os12g0572000	embryo
Os12g0580600	embryo
Os12g0581800	embryo
Os12g0581900	embryo
Os12g0588800	embryo
Os12g0592300	embryo
Os12g0601000	embryo
Os12g0601400	embryo
Os12g0614600	embryo
Os12g0614800	embryo
Os12g0615600	embryo
Os12g0616000	embryo
Os12g0628400	embryo
Os12g0633200	embryo
Os01g0104200	endosperm
Os01g0104500	endosperm
Os01g0106600	endosperm
Os01g0110600	endosperm
Os01g0125550	endosperm
Os01g0138800	endosperm
Os01g0151500	endosperm
Os01g0180900	endosperm
Os01g0186900	endosperm
Os01g0187000	endosperm
Os01g0187600	endosperm
Os01g0205600	endosperm
Os01g0205900	endosperm
Os01g0218032	endosperm
Os01g0244150	endosperm
Os01g0244400	endosperm
Os01g0252300	endosperm
Os01g0265200	endosperm
Os01g0273800	endosperm
Os01g0283600	endosperm
Os01g0332200	endosperm
Os01g0343400	endosperm
Os01g0346900	endosperm
Os01g0386600	endosperm
Os01g0393100	endosperm
Os01g0393300	endosperm
Os01g0498300	endosperm
Os01g0527900	endosperm
Os01g0554150	endosperm
Os01g0567600	endosperm
Os01g0585300	endosperm
Os01g0594300	endosperm
Os01g0594500	endosperm
Os01g0594900	endosperm
Os01g0615500	endosperm
Os01g0633100	endosperm
Os01g0634600	endosperm
Os01g0640700	endosperm
Os01g0664200	endosperm
Os01g0665900	endosperm
Os01g0683700	endosperm
Os01g0690200	endosperm
Os01g0699100	endosperm
Os01g0699500	endosperm
Os01g0699600	endosperm
Os01g0706600	endosperm
Os01g0711900	endosperm
Os01g0727600	endosperm
Os01g0737100	endosperm
Os01g0750600	endosperm
Os01g0760600	endosperm
Os01g0761800	endosperm
Os01g0778100	endosperm
Os01g0781100	endosperm
Os01g0783700	endosperm
Os01g0786700	endosperm
Os01g0799000	endosperm
Os01g0801700	endosperm
Os01g0805600	endosperm
Os01g0806400	endosperm
Os01g0812100	endosperm
Os01g0823100	endosperm
Os01g0829600	endosperm
Os01g0838600	endosperm
Os01g0842400	endosperm
Os01g0871700	endosperm
Os01g0876300	endosperm
Os01g0878900	endosperm
Os01g0884800	endosperm
Os01g0898500	endosperm
Os01g0923300	endosperm
Os01g0942300	endosperm
Os01g0947000	endosperm
Os01g0953500	endosperm
Os01g0954000	endosperm
Os01g0956500	endosperm
Os01g0959100	endosperm
Os01g0971800	endosperm
Os01g0974400	endosperm
Os01g0975800	endosperm
Os02g0103200	endosperm
Os02g0117700	endosperm
Os02g0125500	endosperm
Os02g0134200	endosperm
Os02g0135900	endosperm
Os02g0165800	endosperm
Os02g0170300	endosperm
Os02g0208700	endosperm
Os02g0226200	endosperm
Os02g0227100	endosperm
Os02g0244100	endosperm
Os02g0252400	endosperm
Os02g0282900	endosperm
Os02g0288400	endosperm
Os02g0301100	endosperm
Os02g0307700	endosperm
Os02g0322400	endosperm
Os02g0455800	endosperm
Os02g0487300	endosperm
Os02g0513100	endosperm
Os02g0517700	endosperm
Os02g0528200	endosperm
Os02g0530300	endosperm
Os02g0535901	endosperm
Os02g0554200	endosperm
Os02g0579600	endosperm
Os02g0594800	endosperm
Os02g0604000	endosperm
Os02g0612700	endosperm
Os02g0628900	endosperm
Os02g0629400	endosperm
Os02g0630250	endosperm
Os02g0640000	endosperm
Os02g0661900	endosperm
Os02g0665500	endosperm
Os02g0682200	endosperm
Os02g0684000	endosperm
Os02g0702100	endosperm
Os02g0709300	endosperm
Os02g0709400	endosperm
Os02g0716500	endosperm
Os02g0725900	endosperm
Os02g0731400	endosperm
Os02g0731500	endosperm
Os02g0762400	endosperm
Os02g0763200	endosperm
Os02g0763800	endosperm
Os02g0763900	endosperm
Os02g0766600	endosperm
Os02g0767600	endosperm
Os02g0802700	endosperm
Os02g0828100	endosperm
Os03g0111000	endosperm
Os03g0112900	endosperm
Os03g0117000	endosperm
Os03g0123300	endosperm
Os03g0130300	endosperm
Os03g0142500	endosperm
Os03g0148700	endosperm
Os03g0157600	endosperm
Os03g0168000	endosperm
Os03g0179100	endosperm
Os03g0182800	endosperm
Os03g0194300	endosperm
Os03g0196000	endosperm
Os03g0225100	endosperm
Os03g0226300	endosperm
Os03g0229500	endosperm
Os03g0240500	endosperm
Os03g0246900	endosperm
Os03g0255400	endosperm
Os03g0270800	endosperm
Os03g0271200	endosperm
Os03g0290900	endosperm
Os03g0292700	endosperm
Os03g0331700	endosperm
Os03g0334000	endosperm
Os03g0338000	endosperm
Os03g0340500	endosperm
Os03g0362032	endosperm
Os03g0407400	endosperm
Os03g0409400	endosperm
Os03g0415200	endosperm
Os03g0439000	endosperm
Os03g0581100	endosperm
Os03g0582000	endosperm
Os03g0582400	endosperm
Os03g0598700	endosperm
Os03g0615300	endosperm
Os03g0637800	endosperm
Os03g0643250	endosperm
Os03g0679800	endosperm
Os03g0680100	endosperm
Os03g0710700	endosperm
Os03g0722000	endosperm
Os03g0724500	endosperm
Os03g0727800	endosperm
Os03g0734500	endosperm
Os03g0736700	endosperm
Os03g0758100	endosperm
Os03g0769500	endosperm
Os03g0776400	endosperm
Os03g0788700	endosperm
Os03g0808200	endosperm
Os03g0836400	endosperm
Os04g0160600	endosperm
Os04g0162100	endosperm
Os04g0162500	endosperm
Os04g0181300	endosperm
Os04g0208200	endosperm
Os04g0208900	endosperm
Os04g0234600	endosperm
Os04g0249500	endosperm
Os04g0271000	endosperm
Os04g0309600	endosperm
Os04g0311400	endosperm
Os04g0346900	endosperm
Os04g0350700	endosperm
Os04g0373000	endosperm
Os04g0412100	endosperm
Os04g0413500	endosperm
Os04g0418500	endosperm
Os04g0429400	endosperm
Os04g0439200	endosperm
Os04g0447800	endosperm
Os04g0463000	endosperm
Os04g0471300	endosperm
Os04g0482900	endosperm
Os04g0484300	endosperm
Os04g0489800	endosperm
Os04g0490800	endosperm
Os04g0499200	endosperm
Os04g0506900	endosperm
Os04g0508400	endosperm
Os04g0510600	endosperm
Os04g0513400	endosperm
Os04g0527400	endosperm
Os04g0537900	endosperm
Os04g0538400	endosperm
Os04g0552300	endosperm
Os04g0560600	endosperm
Os04g0564000	endosperm
Os04g0583900	endosperm
Os04g0584100	endosperm
Os04g0599300	endosperm
Os04g0604300	endosperm
Os04g0606200	endosperm
Os04g0614100	endosperm
Os04g0634900	endosperm
Os04g0641200	endosperm
Os04g0645100	endosperm
Os04g0645500	endosperm
Os04g0648700	endosperm
Os04g0677400	endosperm
Os04g0682100	endosperm
Os04g0682400	endosperm
Os04g0692750	endosperm
Os05g0102600	endosperm
Os05g0108600	endosperm
Os05g0121600	endosperm
Os05g0151400	endosperm
Os05g0158500	endosperm
Os05g0169200	endosperm
Os05g0169300	endosperm
Os05g0187500	endosperm
Os05g0277500	endosperm
Os05g0304800	endosperm
Os05g0313700	endosperm
Os05g0344400	endosperm
Os05g0364700	endosperm
Os05g0382000	endosperm
Os05g0382550	endosperm
Os05g0384600	endosperm
Os05g0408300	endosperm
Os05g0409500	endosperm
Os05g0428600	endosperm
Os05g0433100	endosperm
Os05g0437401	endosperm
Os05g0438500	endosperm
Os05g0445900	endosperm
Os05g0447200	endosperm
Os05g0463400	endosperm
Os05g0476700	endosperm
Os05g0490700	endosperm
Os05g0517400	endosperm
Os05g0548700	endosperm
Os05g0552800	endosperm
Os05g0562800	endosperm
Os05g0566800	endosperm
Os05g0591600	endosperm
Os06g0130400	endosperm
Os06g0133000	endosperm
Os06g0133500	endosperm
Os06g0139800	endosperm
Os06g0160600	endosperm
Os06g0160700	endosperm
Os06g0187200	endosperm
Os06g0219900	endosperm
Os06g0229800	endosperm
Os06g0234400	endosperm
Os06g0254700	endosperm
Os06g0260000	endosperm
Os06g0275500	endosperm
Os06g0335900	endosperm
Os06g0335975	endosperm
Os06g0352200	endosperm
Os06g0495500	endosperm
Os06g0528300	endosperm
Os06g0539400	endosperm
Os06g0554100	endosperm
Os06g0589700	endosperm
Os06g0594400	endosperm
Os06g0601600	endosperm
Os06g0623700	endosperm
Os06g0625400	endosperm
Os06g0635200	endosperm
Os06g0643800	endosperm
Os06g0647200	endosperm
Os06g0663500	endosperm
Os06g0664300	endosperm
Os06g0676700	endosperm
Os06g0692500	endosperm
Os06g0696600	endosperm
Os06g0721900	endosperm
Os06g0723650	endosperm
Os06g0726400	endosperm
Os06g0727000	endosperm
Os07g0105200	endosperm
Os07g0119600	endosperm
Os07g0133700	endosperm
Os07g0148200	endosperm
Os07g0161500	endosperm
Os07g0168600	endosperm
Os07g0179500	endosperm
Os07g0182000	endosperm
Os07g0182900	endosperm
Os07g0199000	endosperm
Os07g0200500	endosperm
Os07g0204100	endosperm
Os07g0212300	endosperm
Os07g0231700	endosperm
Os07g0242000	endosperm
Os07g0245100	endosperm
Os07g0274700	endosperm
Os07g0276000	endosperm
Os07g0296900	endosperm
Os07g0438600	endosperm
Os07g0464200	endosperm
Os07g0485000	endosperm
Os07g0489500	endosperm
Os07g0493400	endosperm
Os07g0504200	endosperm
Os07g0524200	endosperm
Os07g0534300	endosperm
Os07g0534500	endosperm
Os07g0543100	endosperm
Os07g0557100	endosperm
Os07g0575900	endosperm
Os07g0583700	endosperm
Os07g0586200	endosperm
Os07g0594400	endosperm
Os07g0603700	endosperm
Os07g0609766	endosperm
Os07g0612400	endosperm
Os07g0659900	endosperm
Os07g0667100	endosperm
Os07g0684000	endosperm
Os08g0104900	endosperm
Os08g0106501	endosperm
Os08g0137100	endosperm
Os08g0137250	endosperm
Os08g0143150	endosperm
Os08g0144100	endosperm
Os08g0163600	endosperm
Os08g0187800	endosperm
Os08g0191433	endosperm
Os08g0197900	endosperm
Os08g0237000	endosperm
Os08g0276200	endosperm
Os08g0280100	endosperm
Os08g0345800	endosperm
Os08g0402500	endosperm
Os08g0457400	endosperm
Os08g0473600	endosperm
Os08g0495800	endosperm
Os08g0516600	endosperm
Os08g0520900	endosperm
Os08g0531600	endosperm
Os08g0535200	endosperm
Os08g0546100	endosperm
Os08g0557400	endosperm
Os09g0114700	endosperm
Os09g0116800	endosperm
Os09g0275300	endosperm
Os09g0306800	endosperm
Os09g0331900	endosperm
Os09g0385700	endosperm
Os09g0418500	endosperm
Os09g0437900	endosperm
Os09g0438100	endosperm
Os09g0461900	endosperm
Os09g0482000	endosperm
Os09g0502100	endosperm
Os09g0520400	endosperm
Os09g0526700	endosperm
Os09g0533200	endosperm
Os09g0552900	endosperm
Os09g0553200	endosperm
Os09g0571000	endosperm
Os09g0571100	endosperm
Os10g0109900	endosperm
Os10g0155300	endosperm
Os10g0191900	endosperm
Os10g0325400	endosperm
Os10g0344000	endosperm
Os10g0376400	endosperm
Os10g0377000	endosperm
Os10g0397900	endosperm
Os10g0423800	endosperm
Os10g0463800	endosperm
Os10g0467800	endosperm
Os10g0472400	endosperm
Os10g0508100	endosperm
Os10g0536600	endosperm
Os10g0539600	endosperm
Os10g0555200	endosperm
Os11g0100800	endosperm
Os11g0111900	endosperm
Os11g0112400	endosperm
Os11g0138600	endosperm
Os11g0150100	endosperm
Os11g0151700	endosperm
Os11g0152700	endosperm
Os11g0195800	endosperm
Os11g0199200	endosperm
Os11g0219400	endosperm
Os11g0239500	endosperm
Os11g0255300	endosperm
Os11g0512000	endosperm
Os11g0512100	endosperm
Os11g0512600	endosperm
Os11g0528400	endosperm
Os11g0603100	endosperm
Os11g0641300	endosperm
Os11g0652600	endosperm
Os11g0657100	endosperm
Os11g0696400	endosperm
Os11g0704100	endosperm
Os12g0104400	endosperm
Os12g0114000	endosperm
Os12g0123800	endosperm
Os12g0127200	endosperm
Os12g0137700	endosperm
Os12g0151000	endosperm
Os12g0156100	endosperm
Os12g0158600	endosperm
Os12g0161500	endosperm
Os12g0165200	endosperm
Os12g0189500	endosperm
Os12g0225200	endosperm
Os12g0577100	endosperm
Os12g0604600	endosperm
Os12g0631100	endosperm
Os02g0106100	pericarp
Os01g0136000	pericarp
Os01g0155800	pericarp
Os01g0176100	pericarp
Os01g0209800	pericarp
Os01g0226600	pericarp
Os01g0542700	pericarp
Os01g0557100	pericarp
Os01g0637500	pericarp
Os01g0668100	pericarp
Os01g0685300	pericarp
Os01g0718000	pericarp
Os01g0719600	pericarp
Os01g0724700	pericarp
Os01g0747600	pericarp
Os01g0756700	pericarp
Os01g0784800	pericarp
Os01g0853000	pericarp
Os01g0862200	pericarp
Os01g0910900	pericarp
Os01g0974200	pericarp
Os02g0177600	pericarp
Os02g0243300	pericarp
Os02g0285700	pericarp
Os02g0286350	pericarp
Os02g0320800	pericarp
Os02g0553200	pericarp
Os02g0568600	pericarp
Os02g0609800	pericarp
Os02g0617400	pericarp
Os02g0644200	pericarp
Os02g0644900	pericarp
Os02g0658800	pericarp
Os02g0721100	pericarp
Os02g0823100	pericarp
Os03g0168300	pericarp
Os03g0176900	pericarp
Os03g0191900	pericarp
Os03g0197200	pericarp
Os03g0212300	pericarp
Os03g0285300	pericarp
Os03g0289300	pericarp
Os03g0352400	pericarp
Os03g0377600	pericarp
Os03g0592500	pericarp
Os03g0757500	pericarp
Os03g0800400	pericarp
Os04g0206700	pericarp
Os04g0376000	pericarp
Os04g0379400	pericarp
Os04g0407900	pericarp
Os04g0444300	pericarp
Os04g0500900	pericarp
Os04g0545100	pericarp
Os04g0678700	pericarp
Os05g0103300	pericarp
Os05g0103400	pericarp
Os05g0143700	pericarp
Os05g0193900	pericarp
Os05g0214300	pericarp
Os05g0227600	pericarp
Os05g0280200	pericarp
Os05g0368100	pericarp
Os05g0402900	pericarp
Os05g0475700	pericarp
Os05g0477500	pericarp
Os05g0482400	pericarp
Os05g0494200	pericarp
Os05g0499400	pericarp
Os05g0500000	pericarp
Os05g0585700	pericarp
Os06g0142000	pericarp
Os06g0250600	pericarp
Os06g0264800	pericarp
Os06g0294600	pericarp
Os06g0320500	pericarp
Os06g0351500	pericarp
Os06g0496400	pericarp
Os06g0604000	pericarp
Os06g0613000	pericarp
Os06g0673500	pericarp
Os06g0684900	pericarp
Os07g0147500	pericarp
Os07g0180700	pericarp
Os07g0194100	pericarp
Os07g0493800	pericarp
Os07g0517100	pericarp
Os07g0550500	pericarp
Os07g0605200	pericarp
Os07g0617100	pericarp
Os07g0639000	pericarp
Os07g0663500	pericarp
Os08g0109400	pericarp
Os08g0131300	pericarp
Os08g0189600	pericarp
Os08g0200300	pericarp
Os08g0366100	pericarp
Os08g0411850	pericarp
Os08g0437300	pericarp
Os08g0526300	pericarp
Os08g0541800	pericarp
Os08g0547800	pericarp
Os09g0344900	pericarp
Os09g0347300	pericarp
Os09g0422000	pericarp
Os09g0442400	pericarp
Os09g0458900	pericarp
Os09g0460200	pericarp
Os09g0472100	pericarp
Os09g0499400	pericarp
Os09g0517200	pericarp
Os10g0113100	pericarp
Os10g0124100	pericarp
Os10g0150400	pericarp
Os10g0360100	pericarp
Os10g0378100	pericarp
Os10g0420400	pericarp
Os10g0426300	pericarp
Os10g0462300	pericarp
Os10g0490800	pericarp
Os10g0496000	pericarp
Os11g0120300	pericarp
Os11g0133800	pericarp
Os11g0146950	pericarp
Os11g0213000	pericarp
Os11g0232100	pericarp
Os11g0242800	pericarp
Os11g0323860	pericarp
Os11g0412484	pericarp
Os11g0531700	pericarp
Os11g0549605	pericarp
Os11g0593700	pericarp
Os11g0621500	pericarp
Os11g0630700	pericarp
Os11g0652900	pericarp
Os12g0112000	pericarp
Os12g0117400	pericarp
Os12g0120100	pericarp
Os12g0150200	pericarp
Os12g0164600	pericarp
Os12g0291100	pericarp
Os12g0420400	pericarp
Os12g0503300	pericarp
Os12g0565200	pericarp
Os12g0571700	pericarp
Os12g0577200	pericarp

## Sheet: Table S4
Table S4. GO for marker genes in rice seed
cluster	GO_acc	term_type	Term	queryitem 1	querytotal 2	bgitem 3	bgtotal 4	pvalue 5	FDR 6	entries
0	GO:0003824	F	catalytic activity	5	14	12724	24075	0.94	1	// Os05g0405000 // Os02g0100100 // Os07g0616800 // Os02g0528200 // Os08g0290700
0	GO:0005488	F	binding	7	14	16823	24075	0.97	1	// Os05g0405000 // Os03g0670700 // Os02g0528200 // Os07g0683900 // Os05g0415400 // Os01g0719100 // Os12g0632000
0	GO:0005622	C	intracellular	9	14	4116	24075	0.00011	0.0004	// Os03g0766100 // Os05g0405000 // Os02g0248800 // Os02g0100100 // Os02g0528200 // Os05g0119300 // Os08g0290700 // Os12g0269200 // Os01g0719100
0	GO:0005623	C	cell	9	14	5945	24075	0.002	0.0058	// Os03g0766100 // Os05g0405000 // Os02g0248800 // Os02g0100100 // Os02g0528200 // Os05g0119300 // Os08g0290700 // Os12g0269200 // Os01g0719100
0	GO:0005737	C	cytoplasm	9	14	1263	24075	4.9e-09	7.2e-08	// Os03g0766100 // Os05g0405000 // Os02g0248800 // Os02g0100100 // Os02g0528200 // Os05g0119300 // Os08g0290700 // Os12g0269200 // Os01g0719100
0	GO:0043226	C	organelle	9	14	2859	24075	5.4e-06	2.6e-05	// Os03g0766100 // Os05g0405000 // Os02g0248800 // Os02g0100100 // Os02g0528200 // Os05g0119300 // Os08g0290700 // Os12g0269200 // Os01g0719100
0	GO:0043227	C	membrane-bounded organelle	9	14	2319	24075	9.2e-07	6.8e-06	// Os03g0766100 // Os05g0405000 // Os02g0248800 // Os02g0100100 // Os02g0528200 // Os05g0119300 // Os08g0290700 // Os12g0269200 // Os01g0719100
0	GO:0043229	C	intracellular organelle	9	14	2859	24075	5.4e-06	2.6e-05	// Os03g0766100 // Os05g0405000 // Os02g0248800 // Os02g0100100 // Os02g0528200 // Os05g0119300 // Os08g0290700 // Os12g0269200 // Os01g0719100
0	GO:0043231	C	intracellular membrane-bounded organelle	9	14	2296	24075	8.5e-07	6.8e-06	// Os03g0766100 // Os05g0405000 // Os02g0248800 // Os02g0100100 // Os02g0528200 // Os05g0119300 // Os08g0290700 // Os12g0269200 // Os01g0719100
0	GO:0044424	C	intracellular part	9	14	3529	24075	3.1e-05	0.00013	// Os03g0766100 // Os05g0405000 // Os02g0248800 // Os02g0100100 // Os02g0528200 // Os05g0119300 // Os08g0290700 // Os12g0269200 // Os01g0719100
0	GO:0044444	C	cytoplasmic part	9	14	966	24075	4.7e-10	1.4e-08	// Os03g0766100 // Os05g0405000 // Os02g0248800 // Os02g0100100 // Os02g0528200 // Os05g0119300 // Os08g0290700 // Os12g0269200 // Os01g0719100
0	GO:0044464	C	cell part	9	14	5945	24075	0.002	0.0058	// Os03g0766100 // Os05g0405000 // Os02g0248800 // Os02g0100100 // Os02g0528200 // Os05g0119300 // Os08g0290700 // Os12g0269200 // Os01g0719100
1	GO:0000271	P	polysaccharide biosynthetic process	5	86	76	24075	1.1e-05	0.00035	// Os10g0539600 // Os08g0345800 // Os08g0160500 // Os06g0133000 // Os01g0633100
1	GO:0005975	P	carbohydrate metabolic process	13	86	833	24075	8.9e-06	0.00035	// Os08g0345800 // Os08g0160500 // Os05g0569400 // Os06g0726400 // Os10g0539600 // Os03g0758100 // Os02g0528200 // Os06g0675700 // Os01g0633100 // Os06g0573600 // Os04g0164900 // Os06g0133000 // Os03g0726200
1	GO:0005976	P	polysaccharide metabolic process	5	86	143	24075	0.00019	0.0025	// Os10g0539600 // Os08g0345800 // Os08g0160500 // Os06g0133000 // Os01g0633100
1	GO:0006073	P	cellular glucan metabolic process	5	86	95	24075	2.9e-05	0.00066	// Os10g0539600 // Os08g0345800 // Os08g0160500 // Os06g0133000 // Os01g0633100
1	GO:0006464	P	protein modification process	8	86	1929	24075	0.38	1	// Os10g0541200 // Os02g0799000 // Os10g0539600 // Os01g0252100 // Os01g0231500 // Os10g0431000 // Os03g0334000 // Os12g0428600
1	GO:0006793	P	phosphorus metabolic process	7	86	1795	24075	0.46	1	// Os10g0541200 // Os06g0208700 // Os02g0799000 // Os10g0539600 // Os01g0252100 // Os01g0231500 // Os03g0334000
1	GO:0006796	P	phosphate metabolic process	7	86	1795	24075	0.46	1	// Os10g0541200 // Os06g0208700 // Os02g0799000 // Os10g0539600 // Os01g0252100 // Os01g0231500 // Os03g0334000
1	GO:0006810	P	transport	5	86	1638	24075	0.7	1	// Os05g0111200 // Os07g0557100 // Os01g0265200 // Os08g0187800 // Os02g0202400
1	GO:0008152	P	metabolic process	31	86	14398	24075	1	1	// Os03g0334000 // Os06g0208700 // Os12g0244100 // Os03g0758100 // Os06g0675700 // Os01g0231500 // Os02g0777700 // Os03g0726200 // Os08g0345800 // Os10g0541200 // Os06g0726400 // Os12g0612400 // Os02g0799000 // Os06g0573600 // Os01g0252100 // Os05g0569400 // Os02g0528200 // Os02g0709400 // Os01g0633100 // Os07g0182000 // Os04g0164900 // Os01g0393100 // Os08g0160500 // Os01g0309900 // Os10g0539600…
1	GO:0009058	P	biosynthetic process	9	86	6085	24075	1	1	// Os08g0345800 // Os01g0393100 // Os08g0160500 // Os10g0539600 // Os11g0512000 // Os02g0777700 // Os07g0182000 // Os01g0633100 // Os06g0133000
1	GO:0009059	P	macromolecule biosynthetic process	9	86	5252	24075	1	1	// Os08g0345800 // Os01g0393100 // Os08g0160500 // Os10g0539600 // Os11g0512000 // Os02g0777700 // Os07g0182000 // Os01g0633100 // Os06g0133000
1	GO:0009250	P	glucan biosynthetic process	5	86	65	24075	5.1e-06	0.00035	// Os10g0539600 // Os08g0345800 // Os08g0160500 // Os06g0133000 // Os01g0633100
1	GO:0009987	P	cellular process	22	86	12839	24075	1	1	// Os03g0334000 // Os06g0208700 // Os12g0244100 // Os01g0231500 // Os02g0777700 // Os03g0726200 // Os08g0345800 // Os10g0541200 // Os12g0612400 // Os02g0799000 // Os07g0608900 // Os01g0252100 // Os01g0633100 // Os07g0182000 // Os01g0393100 // Os08g0160500 // Os05g0584600 // Os10g0539600 // Os10g0431000 // Os11g0512000 // Os06g0133000 // Os12g0428600
1	GO:0016051	P	carbohydrate biosynthetic process	5	86	121	24075	8.8e-05	0.0013	// Os10g0539600 // Os08g0345800 // Os08g0160500 // Os06g0133000 // Os01g0633100
1	GO:0019538	P	protein metabolic process	12	86	4333	24075	0.87	1	// Os10g0541200 // Os10g0539600 // Os06g0625400 // Os12g0612400 // Os03g0334000 // Os02g0709400 // Os01g0231500 // Os10g0431000 // Os02g0799000 // Os12g0244100 // Os01g0252100 // Os12g0428600
1	GO:0033692	P	cellular polysaccharide biosynthetic process	5	86	73	24075	8.7e-06	0.00035	// Os10g0539600 // Os08g0345800 // Os08g0160500 // Os06g0133000 // Os01g0633100
1	GO:0034637	P	cellular carbohydrate biosynthetic process	5	86	114	24075	6.7e-05	0.0011	// Os10g0539600 // Os08g0345800 // Os08g0160500 // Os06g0133000 // Os01g0633100
1	GO:0034645	P	cellular macromolecule biosynthetic process	9	86	5248	24075	1	1	// Os08g0345800 // Os01g0393100 // Os08g0160500 // Os10g0539600 // Os11g0512000 // Os02g0777700 // Os07g0182000 // Os01g0633100 // Os06g0133000
1	GO:0043170	P	macromolecule metabolic process	20	86	10433	24075	1	1	// Os08g0345800 // Os10g0541200 // Os12g0612400 // Os01g0393100 // Os06g0625400 // Os11g0512000 // Os02g0777700 // Os03g0334000 // Os02g0709400 // Os12g0244100 // Os01g0231500 // Os08g0160500 // Os10g0431000 // Os02g0799000 // Os01g0633100 // Os07g0182000 // Os10g0539600 // Os01g0252100 // Os12g0428600 // Os06g0133000
1	GO:0043412	P	macromolecule modification	8	86	1979	24075	0.41	1	// Os10g0541200 // Os02g0799000 // Os10g0539600 // Os01g0252100 // Os01g0231500 // Os10g0431000 // Os03g0334000 // Os12g0428600
1	GO:0043687	P	post-translational protein modification	7	86	1815	24075	0.47	1	// Os10g0541200 // Os02g0799000 // Os10g0539600 // Os01g0252100 // Os01g0231500 // Os10g0431000 // Os03g0334000
1	GO:0044042	P	glucan metabolic process	5	86	95	24075	2.9e-05	0.00066	// Os10g0539600 // Os08g0345800 // Os08g0160500 // Os06g0133000 // Os01g0633100
1	GO:0044237	P	cellular metabolic process	20	86	10696	24075	1	1	// Os08g0345800 // Os10g0541200 // Os12g0612400 // Os06g0208700 // Os06g0133000 // Os01g0393100 // Os11g0512000 // Os02g0777700 // Os03g0334000 // Os12g0244100 // Os01g0231500 // Os08g0160500 // Os10g0431000 // Os02g0799000 // Os01g0633100 // Os07g0182000 // Os10g0539600 // Os01g0252100 // Os12g0428600 // Os03g0726200
1	GO:0044238	P	primary metabolic process	29	86	11969	24075	1	1	// Os03g0334000 // Os12g0244100 // Os03g0758100 // Os06g0675700 // Os01g0231500 // Os02g0777700 // Os03g0726200 // Os08g0345800 // Os10g0541200 // Os06g0726400 // Os12g0612400 // Os02g0799000 // Os06g0573600 // Os01g0252100 // Os05g0569400 // Os02g0528200 // Os02g0709400 // Os01g0633100 // Os07g0182000 // Os04g0164900 // Os01g0393100 // Os08g0160500 // Os01g0309900 // Os10g0539600 // Os06g0625400…
1	GO:0044249	P	cellular biosynthetic process	9	86	5890	24075	1	1	// Os08g0345800 // Os01g0393100 // Os08g0160500 // Os10g0539600 // Os11g0512000 // Os02g0777700 // Os07g0182000 // Os01g0633100 // Os06g0133000
1	GO:0044260	P	cellular macromolecule metabolic process	18	86	9350	24075	1	1	// Os08g0345800 // Os10g0541200 // Os12g0612400 // Os02g0799000 // Os10g0539600 // Os11g0512000 // Os02g0777700 // Os01g0393100 // Os12g0244100 // Os01g0231500 // Os08g0160500 // Os10g0431000 // Os03g0334000 // Os01g0633100 // Os07g0182000 // Os01g0252100 // Os12g0428600 // Os06g0133000
1	GO:0044262	P	cellular carbohydrate metabolic process	6	86	385	24075	0.0027	0.034	// Os08g0345800 // Os08g0160500 // Os10g0539600 // Os01g0633100 // Os06g0133000 // Os03g0726200
1	GO:0044264	P	cellular polysaccharide metabolic process	5	86	103	24075	4.2e-05	0.00082	// Os10g0539600 // Os08g0345800 // Os08g0160500 // Os06g0133000 // Os01g0633100
1	GO:0044267	P	cellular protein metabolic process	10	86	2877	24075	0.59	1	// Os10g0541200 // Os02g0799000 // Os10g0539600 // Os12g0612400 // Os01g0252100 // Os01g0231500 // Os10g0431000 // Os03g0334000 // Os12g0244100 // Os12g0428600
1	GO:0050789	P	regulation of biological process	5	86	2027	24075	0.86	1	// Os07g0182000 // Os01g0393100 // Os06g0498800 // Os02g0777700 // Os11g0512000
1	GO:0051179	P	localization	5	86	1651	24075	0.71	1	// Os05g0111200 // Os07g0557100 // Os01g0265200 // Os08g0187800 // Os02g0202400
1	GO:0051234	P	establishment of localization	5	86	1638	24075	0.7	1	// Os05g0111200 // Os07g0557100 // Os01g0265200 // Os08g0187800 // Os02g0202400
1	GO:0065007	P	biological regulation	6	86	2125	24075	0.78	1	// Os01g0393100 // Os07g0182000 // Os01g0231500 // Os02g0777700 // Os11g0512000 // Os06g0498800
1	GO:0000166	F	nucleotide binding	11	86	3874	24075	0.84	1	// Os08g0345800 // Os03g0334000 // Os07g0660200 // Os05g0584600 // Os10g0539600 // Os01g0252100 // Os12g0244100 // Os01g0231500 // Os05g0438800 // Os02g0777700 // Os03g0726200
1	GO:0001882	F	nucleoside binding	11	86	3257	24075	0.63	1	// Os08g0345800 // Os03g0334000 // Os07g0660200 // Os05g0584600 // Os10g0539600 // Os01g0252100 // Os12g0244100 // Os01g0231500 // Os05g0438800 // Os02g0777700 // Os03g0726200
1	GO:0001883	F	purine nucleoside binding	11	86	3247	24075	0.62	1	// Os08g0345800 // Os03g0334000 // Os07g0660200 // Os05g0584600 // Os10g0539600 // Os01g0252100 // Os12g0244100 // Os01g0231500 // Os05g0438800 // Os02g0777700 // Os03g0726200
1	GO:0003676	F	nucleic acid binding	9	86	8251	24075	1	1	// Os01g0393100 // Os07g0660200 // Os02g0777700 // Os04g0276200 // Os05g0125000 // Os01g0102400 // Os10g0431000 // Os11g0512000 // Os07g0182000
1	GO:0003677	F	DNA binding	6	86	5059	24075	1	1	// Os01g0393100 // Os11g0512000 // Os05g0125000 // Os01g0102400 // Os02g0777700 // Os07g0182000
1	GO:0003824	F	catalytic activity	33	86	12724	24075	1	1	// Os03g0334000 // Os06g0208700 // Os07g0607400 // Os05g0438800 // Os03g0758100 // Os06g0675700 // Os01g0231500 // Os02g0777700 // Os03g0726200 // Os02g0793900 // Os10g0541200 // Os06g0726400 // Os02g0173100 // Os02g0799000 // Os06g0573600 // Os01g0252100 // Os05g0569400 // Os07g0660200 // Os08g0345800 // Os02g0528200 // Os02g0709400 // Os01g0633100 // Os04g0164900 // Os08g0160500 // Os01g0309900…
1	GO:0004553	F	hydrolase activity, hydrolyzing O-glycosyl compounds	5	86	424	24075	0.019	1	// Os06g0675700 // Os06g0726400 // Os06g0573600 // Os02g0528200 // Os04g0164900
1	GO:0005488	F	binding	39	86	16823	24075	1	1	// Os03g0334000 // Os05g0438800 // Os04g0276200 // Os03g0758100 // Os01g0231500 // Os02g0777700 // Os03g0726200 // Os08g0345800 // Os10g0541200 // Os04g0645100 // Os06g0726400 // Os02g0202400 // Os12g0612400 // Os02g0173100 // Os02g0799000 // Os12g0244100 // Os06g0573600 // Os01g0252100 // Os05g0569400 // Os07g0660200 // Os09g0247700 // Os02g0528200 // Os04g0566400 // Os05g0102600 // Os07g0182000…
1	GO:0005515	F	protein binding	8	86	2460	24075	0.66	1	// Os01g0667700 // Os05g0438800 // Os12g0612400 // Os05g0125000 // Os10g0431000 // Os05g0102600 // Os12g0244100 // Os07g0182000
1	GO:0005524	F	ATP binding	11	86	3085	24075	0.55	1	// Os08g0345800 // Os03g0334000 // Os07g0660200 // Os05g0584600 // Os10g0539600 // Os01g0252100 // Os12g0244100 // Os01g0231500 // Os05g0438800 // Os02g0777700 // Os03g0726200
1	GO:0008270	F	zinc ion binding	8	86	3939	24075	0.98	1	// Os01g0667700 // Os09g0247700 // Os05g0125000 // Os04g0566400 // Os10g0431000 // Os05g0102600 // Os06g0625400 // Os08g0545200
1	GO:0016301	F	kinase activity	6	86	1750	24075	0.6	1	// Os02g0793900 // Os03g0334000 // Os10g0539600 // Os01g0252100 // Os01g0231500 // Os03g0726200
1	GO:0016740	F	transferase activity	11	86	6190	24075	1	1	// Os02g0793900 // Os03g0334000 // Os08g0160500 // Os08g0345800 // Os10g0539600 // Os01g0252100 // Os03g0758100 // Os01g0231500 // Os01g0633100 // Os06g0133000 // Os03g0726200
1	GO:0016772	F	transferase activity, transferring phosphorus-containing groups	8	86	4781	24075	1	1	// Os02g0793900 // Os03g0334000 // Os08g0345800 // Os10g0539600 // Os01g0252100 // Os01g0231500 // Os01g0633100 // Os03g0726200
1	GO:0016773	F	phosphotransferase activity, alcohol group as acceptor	5	86	1726	24075	0.75	1	// Os01g0231500 // Os03g0334000 // Os10g0539600 // Os01g0252100 // Os03g0726200
1	GO:0016787	F	hydrolase activity	17	86	4901	24075	0.6	1	// Os10g0541200 // Os06g0208700 // Os01g0309900 // Os07g0660200 // Os07g0607400 // Os06g0726400 // Os05g0438800 // Os06g0625400 // Os05g0584600 // Os02g0528200 // Os02g0709400 // Os06g0675700 // Os02g0799000 // Os07g0212300 // Os02g0777700 // Os06g0573600 // Os04g0164900
1	GO:0016788	F	hydrolase activity, acting on ester bonds	5	86	1949	24075	0.83	1	// Os10g0541200 // Os06g0208700 // Os01g0309900 // Os02g0799000 // Os07g0607400
1	GO:0016798	F	hydrolase activity, acting on glycosyl bonds	5	86	480	24075	0.03	1	// Os06g0675700 // Os06g0726400 // Os06g0573600 // Os02g0528200 // Os04g0164900
1	GO:0017076	F	purine nucleotide binding	11	86	3456	24075	0.71	1	// Os08g0345800 // Os03g0334000 // Os07g0660200 // Os05g0584600 // Os10g0539600 // Os01g0252100 // Os12g0244100 // Os01g0231500 // Os05g0438800 // Os02g0777700 // Os03g0726200
1	GO:0030554	F	adenyl nucleotide binding	11	86	3247	24075	0.62	1	// Os08g0345800 // Os03g0334000 // Os07g0660200 // Os05g0584600 // Os10g0539600 // Os01g0252100 // Os12g0244100 // Os01g0231500 // Os05g0438800 // Os02g0777700 // Os03g0726200
1	GO:0032553	F	ribonucleotide binding	11	86	3292	24075	0.64	1	// Os08g0345800 // Os03g0334000 // Os07g0660200 // Os05g0584600 // Os10g0539600 // Os01g0252100 // Os12g0244100 // Os01g0231500 // Os05g0438800 // Os02g0777700 // Os03g0726200
1	GO:0032555	F	purine ribonucleotide binding	11	86	3292	24075	0.64	1	// Os08g0345800 // Os03g0334000 // Os07g0660200 // Os05g0584600 // Os10g0539600 // Os01g0252100 // Os12g0244100 // Os01g0231500 // Os05g0438800 // Os02g0777700 // Os03g0726200
1	GO:0032559	F	adenyl ribonucleotide binding	11	86	3087	24075	0.55	1	// Os08g0345800 // Os03g0334000 // Os07g0660200 // Os05g0584600 // Os10g0539600 // Os01g0252100 // Os12g0244100 // Os01g0231500 // Os05g0438800 // Os02g0777700 // Os03g0726200
1	GO:0043167	F	ion binding	18	86	5700	24075	0.76	1	// Os10g0541200 // Os02g0799000 // Os05g0102600 // Os06g0726400 // Os10g0539600 // Os09g0247700 // Os05g0125000 // Os02g0173100 // Os02g0528200 // Os04g0566400 // Os01g0667700 // Os10g0431000 // Os08g0545200 // Os03g0331700 // Os06g0573600 // Os04g0164900 // Os06g0625400 // Os03g0726200
1	GO:0043169	F	cation binding	18	86	5696	24075	0.76	1	// Os10g0541200 // Os02g0799000 // Os05g0102600 // Os06g0726400 // Os10g0539600 // Os09g0247700 // Os05g0125000 // Os02g0173100 // Os02g0528200 // Os04g0566400 // Os01g0667700 // Os10g0431000 // Os08g0545200 // Os03g0331700 // Os06g0573600 // Os04g0164900 // Os06g0625400 // Os03g0726200
1	GO:0046872	F	metal ion binding	14	86	5476	24075	0.95	1	// Os10g0541200 // Os02g0799000 // Os05g0102600 // Os01g0667700 // Os10g0539600 // Os09g0247700 // Os05g0125000 // Os02g0173100 // Os04g0566400 // Os10g0431000 // Os08g0545200 // Os03g0331700 // Os06g0625400 // Os03g0726200
1	GO:0046914	F	transition metal ion binding	10	86	4875	24075	0.99	1	// Os01g0667700 // Os06g0625400 // Os05g0125000 // Os02g0173100 // Os04g0566400 // Os10g0431000 // Os05g0102600 // Os02g0799000 // Os09g0247700 // Os08g0545200
1	GO:0005622	C	intracellular	61	86	4116	24075	6.8e-28	5e-27	// Os05g0432200 // Os04g0404400 // Os01g0356800 // Os07g0607400 // Os05g0438800 // Os08g0321000 // Os06g0675700 // Os01g0231500 // Os04g0543200 // Os02g0777700 // Os03g0686300 // Os03g0726200 // Os08g0345800 // Os10g0541200 // Os08g0296900 // Os09g0419100 // Os04g0645100 // Os06g0726400 // Os02g0202400 // Os12g0612400 // Os02g0173100 // Os12g0145100 // Os02g0807100 // Os03g0240500 // Os02g0799000…
1	GO:0005623	C	cell	68	86	5945	24075	6.4e-26	4.1e-25	// Os05g0432200 // Os04g0404400 // Os01g0356800 // Os07g0607400 // Os05g0438800 // Os07g0557100 // Os08g0321000 // Os06g0675700 // Os01g0231500 // Os04g0543200 // Os02g0777700 // Os03g0686300 // Os12g0145100 // Os01g0187400 // Os03g0726200 // Os08g0345800 // Os10g0541200 // Os08g0296900 // Os09g0419100 // Os04g0645100 // Os06g0726400 // Os02g0202400 // Os12g0612400 // Os02g0173100 // Os08g0152800…
1	GO:0005737	C	cytoplasm	53	86	1263	24075	4.3e-45	2.1e-43	// Os05g0432200 // Os04g0404400 // Os01g0356800 // Os07g0607400 // Os12g0244100 // Os08g0321000 // Os06g0675700 // Os04g0543200 // Os03g0726200 // Os08g0345800 // Os10g0541200 // Os08g0296900 // Os09g0419100 // Os04g0645100 // Os06g0726400 // Os02g0202400 // Os12g0612400 // Os02g0173100 // Os12g0145100 // Os02g0807100 // Os02g0799000 // Os06g0573600 // Os07g0608900 // Os05g0495300 // Os07g0214300…
1	GO:0005739	C	mitochondrion	8	86	162	24075	1.7e-07	1e-06	// Os02g0799000 // Os02g0202400 // Os12g0612400 // Os03g0340500 // Os05g0111200 // Os03g0240500 // Os07g0212300 // Os01g0265200
1	GO:0009536	C	plastid	23	86	37	24075	4.1e-42	1.3e-40	// Os12g0244100 // Os03g0726200 // Os08g0345800 // Os10g0541200 // Os08g0296900 // Os06g0726400 // Os02g0173100 // Os02g0807100 // Os04g0471400 // Os02g0528200 // Os03g0686300 // Os04g0566400 // Os03g0654700 // Os08g0497300 // Os01g0911300 // Os08g0187800 // Os01g0258700 // Os06g0625400 // Os03g0331700 // Os03g0271200 // Os03g0336700 // Os06g0133000 // Os06g0527800
1	GO:0016020	C	membrane	16	86	2115	24075	0.0032	0.017	// Os01g0393100 // Os01g0265200 // Os08g0187800 // Os05g0111200 // Os10g0539600 // Os07g0557100 // Os12g0612400 // Os02g0709400 // Os07g0445600 // Os08g0160500 // Os02g0202400 // Os03g0271200 // Os07g0608900 // Os12g0239200 // Os08g0152800 // Os01g0187400
1	GO:0016021	C	integral to membrane	5	86	752	24075	0.13	0.63	// Os02g0202400 // Os08g0160500 // Os01g0265200 // Os08g0187800 // Os08g0152800
1	GO:0016023	C	cytoplasmic membrane-bounded vesicle	19	86	26	24075	8e-36	1.5e-34	// Os07g0214300 // Os05g0432200 // Os02g0453600 // Os01g0309900 // Os07g0607400 // Os01g0356800 // Os04g0390100 // Os07g0216600 // Os07g0216700 // Os08g0321000 // Os06g0675700 // Os02g0249000 // Os12g0145100 // Os04g0543200 // Os04g0645100 // Os06g0573600 // Os05g0495300 // Os04g0404400 // Os09g0419100
1	GO:0031090	C	organelle membrane	5	86	228	24075	0.0015	0.0083	// Os02g0202400 // Os05g0111200 // Os08g0160500 // Os01g0265200 // Os07g0608900
1	GO:0031224	C	intrinsic to membrane	5	86	775	24075	0.15	0.66	// Os02g0202400 // Os08g0160500 // Os01g0265200 // Os08g0187800 // Os08g0152800
1	GO:0031410	C	cytoplasmic vesicle	19	86	34	24075	3.8e-34	4.1e-33	// Os07g0214300 // Os05g0432200 // Os02g0453600 // Os01g0309900 // Os07g0607400 // Os01g0356800 // Os04g0390100 // Os07g0216600 // Os07g0216700 // Os08g0321000 // Os06g0675700 // Os02g0249000 // Os12g0145100 // Os04g0543200 // Os04g0645100 // Os06g0573600 // Os05g0495300 // Os04g0404400 // Os09g0419100
1	GO:0031982	C	vesicle	19	86	34	24075	3.8e-34	4.1e-33	// Os07g0214300 // Os05g0432200 // Os02g0453600 // Os01g0309900 // Os07g0607400 // Os01g0356800 // Os04g0390100 // Os07g0216600 // Os07g0216700 // Os08g0321000 // Os06g0675700 // Os02g0249000 // Os12g0145100 // Os04g0543200 // Os04g0645100 // Os06g0573600 // Os05g0495300 // Os04g0404400 // Os09g0419100
1	GO:0031988	C	membrane-bounded vesicle	19	86	26	24075	8e-36	1.5e-34	// Os07g0214300 // Os05g0432200 // Os02g0453600 // Os01g0309900 // Os07g0607400 // Os01g0356800 // Os04g0390100 // Os07g0216600 // Os07g0216700 // Os08g0321000 // Os06g0675700 // Os02g0249000 // Os12g0145100 // Os04g0543200 // Os04g0645100 // Os06g0573600 // Os05g0495300 // Os04g0404400 // Os09g0419100
1	GO:0032991	C	macromolecular complex	5	86	1207	24075	0.43	1	// Os05g0438800 // Os10g0541200 // Os10g0431000 // Os02g0799000 // Os02g0777700
1	GO:0043226	C	organelle	57	86	2859	24075	5.2e-32	4.5e-31	// Os05g0432200 // Os04g0404400 // Os01g0356800 // Os07g0607400 // Os05g0438800 // Os08g0321000 // Os06g0675700 // Os01g0231500 // Os04g0543200 // Os02g0777700 // Os03g0726200 // Os08g0345800 // Os10g0541200 // Os08g0296900 // Os09g0419100 // Os04g0645100 // Os06g0726400 // Os02g0202400 // Os12g0612400 // Os02g0173100 // Os12g0145100 // Os02g0807100 // Os02g0799000 // Os12g0244100 // Os06g0573600…
1	GO:0043227	C	membrane-bounded organelle	55	86	2319	24075	2.3e-34	3.1e-33	// Os05g0432200 // Os04g0404400 // Os01g0356800 // Os07g0607400 // Os12g0244100 // Os08g0321000 // Os06g0675700 // Os01g0231500 // Os04g0543200 // Os03g0726200 // Os08g0345800 // Os10g0541200 // Os08g0296900 // Os09g0419100 // Os04g0645100 // Os06g0726400 // Os02g0202400 // Os12g0612400 // Os02g0173100 // Os12g0145100 // Os02g0807100 // Os02g0799000 // Os06g0573600 // Os07g0608900 // Os05g0495300…
1	GO:0043229	C	intracellular organelle	57	86	2859	24075	5.2e-32	4.5e-31	// Os05g0432200 // Os04g0404400 // Os01g0356800 // Os07g0607400 // Os05g0438800 // Os08g0321000 // Os06g0675700 // Os01g0231500 // Os04g0543200 // Os02g0777700 // Os03g0726200 // Os08g0345800 // Os10g0541200 // Os08g0296900 // Os09g0419100 // Os04g0645100 // Os06g0726400 // Os02g0202400 // Os12g0612400 // Os02g0173100 // Os12g0145100 // Os02g0807100 // Os02g0799000 // Os12g0244100 // Os06g0573600…
1	GO:0043231	C	intracellular membrane-bounded organelle	55	86	2296	24075	1.4e-34	2.2e-33	// Os05g0432200 // Os04g0404400 // Os01g0356800 // Os07g0607400 // Os12g0244100 // Os08g0321000 // Os06g0675700 // Os01g0231500 // Os04g0543200 // Os03g0726200 // Os08g0345800 // Os10g0541200 // Os08g0296900 // Os09g0419100 // Os04g0645100 // Os06g0726400 // Os02g0202400 // Os12g0612400 // Os02g0173100 // Os12g0145100 // Os02g0807100 // Os02g0799000 // Os06g0573600 // Os07g0608900 // Os05g0495300…
1	GO:0043234	C	protein complex	5	86	706	24075	0.11	0.55	// Os05g0438800 // Os10g0541200 // Os10g0431000 // Os02g0799000 // Os02g0777700
1	GO:0044422	C	organelle part	7	86	1521	24075	0.3	1	// Os01g0265200 // Os05g0438800 // Os05g0111200 // Os08g0160500 // Os02g0202400 // Os02g0777700 // Os07g0608900
1	GO:0044424	C	intracellular part	58	86	3529	24075	2.6e-28	2.1e-27	// Os05g0432200 // Os04g0404400 // Os01g0356800 // Os07g0607400 // Os05g0438800 // Os08g0321000 // Os06g0675700 // Os01g0231500 // Os04g0543200 // Os02g0777700 // Os03g0726200 // Os08g0345800 // Os10g0541200 // Os08g0296900 // Os09g0419100 // Os04g0645100 // Os06g0726400 // Os02g0202400 // Os12g0612400 // Os02g0173100 // Os12g0145100 // Os02g0807100 // Os02g0799000 // Os12g0244100 // Os06g0573600…
1	GO:0044425	C	membrane part	5	86	1007	24075	0.29	1	// Os02g0202400 // Os08g0160500 // Os01g0265200 // Os08g0187800 // Os08g0152800
1	GO:0044444	C	cytoplasmic part	53	86	966	24075	6.2e-51	5.9e-49	// Os05g0432200 // Os04g0404400 // Os01g0356800 // Os07g0607400 // Os12g0244100 // Os08g0321000 // Os06g0675700 // Os04g0543200 // Os03g0726200 // Os08g0345800 // Os10g0541200 // Os08g0296900 // Os09g0419100 // Os04g0645100 // Os06g0726400 // Os02g0202400 // Os12g0612400 // Os02g0173100 // Os12g0145100 // Os02g0807100 // Os02g0799000 // Os06g0573600 // Os07g0608900 // Os05g0495300 // Os07g0214300…
1	GO:0044446	C	intracellular organelle part	7	86	1521	24075	0.3	1	// Os01g0265200 // Os05g0438800 // Os05g0111200 // Os08g0160500 // Os02g0202400 // Os02g0777700 // Os07g0608900
1	GO:0044464	C	cell part	68	86	5945	24075	6.4e-26	4.1e-25	// Os05g0432200 // Os04g0404400 // Os01g0356800 // Os07g0607400 // Os05g0438800 // Os07g0557100 // Os08g0321000 // Os06g0675700 // Os01g0231500 // Os04g0543200 // Os02g0777700 // Os03g0686300 // Os12g0145100 // Os01g0187400 // Os03g0726200 // Os08g0345800 // Os10g0541200 // Os08g0296900 // Os09g0419100 // Os04g0645100 // Os06g0726400 // Os02g0202400 // Os12g0612400 // Os02g0173100 // Os08g0152800…
2	GO:0000003	P	reproduction	6	133	133	24075	0.00012	0.0054	// Os10g0555900 // Os08g0531700 // Os07g0160100 // Os09g0507200 // Os05g0203800 // Os01g0182600
2	GO:0005975	P	carbohydrate metabolic process	9	133	833	24075	0.043	0.57	// Os11g0171300 // Os03g0837100 // Os03g0749300 // Os06g0697000 // Os04g0624600 // Os05g0366600 // Os06g0573600 // Os07g0139400 // Os10g0465700
2	GO:0006082	P	organic acid metabolic process	7	133	474	24075	0.017	0.31	// Os12g0623900 // Os04g0543900 // Os07g0622200 // Os02g0735200 // Os06g0131300 // Os07g0437500 // Os02g0626400
2	GO:0006091	P	generation of precursor metabolites and energy	13	133	243	24075	1.8e-09	1.1e-07	// Os09g0346500 // Os03g0592500 // Os08g0104600 // Os11g0171300 // Os01g0501800 // Os03g0602300 // Os02g0197600 // Os11g0242800 // Os07g0558400 // Os08g0435900 // Os01g0600900 // Os06g0320500 // Os04g0457000
2	GO:0006139	P	nucleobase, nucleoside, nucleotide and nucleic acid metabolic process	14	133	6695	24075	1	1	// Os01g0799500 // Os08g0531700 // Os03g0764600 // Os07g0684800 // Os04g0656100 // Os05g0203800 // Os02g0729700 // Os03g0742300 // Os03g0183300 // Os04g0460600 // Os04g0461600 // Os09g0507200 // Os01g0679900 // Os03g0284100
2	GO:0006350	P	transcription	10	133	1629	24075	0.41	1	// Os08g0531700 // Os03g0764600 // Os07g0684800 // Os05g0203800 // Os02g0729700 // Os03g0742300 // Os03g0183300 // Os04g0460600 // Os09g0507200 // Os03g0284100
2	GO:0006351	P	transcription, DNA-dependent	7	133	786	24075	0.15	1	// Os08g0531700 // Os09g0507200 // Os05g0203800 // Os02g0729700 // Os03g0742300 // Os03g0183300 // Os03g0284100
2	GO:0006355	P	regulation of transcription, DNA-dependent	7	133	737	24075	0.12	1	// Os08g0531700 // Os09g0507200 // Os05g0203800 // Os02g0729700 // Os03g0742300 // Os03g0183300 // Os03g0284100
2	GO:0006464	P	protein modification process	7	133	1929	24075	0.91	1	// Os03g0592500 // Os03g0183800 // Os05g0202500 // Os03g0292100 // Os04g0584600 // Os03g0319400 // Os09g0524800
2	GO:0006519	P	cellular amino acid and derivative metabolic process	7	133	391	24075	0.0065	0.15	// Os12g0623900 // Os04g0543900 // Os07g0622200 // Os02g0735200 // Os06g0131300 // Os07g0437500 // Os02g0626400
2	GO:0006520	P	cellular amino acid metabolic process	7	133	303	24075	0.0017	0.054	// Os12g0623900 // Os04g0543900 // Os07g0622200 // Os02g0735200 // Os06g0131300 // Os07g0437500 // Os02g0626400
2	GO:0006807	P	nitrogen compound metabolic process	22	133	7073	24075	1	1	// Os03g0742300 // Os02g0735200 // Os03g0183300 // Os04g0461600 // Os02g0626400 // Os08g0531700 // Os05g0203800 // Os02g0729700 // Os01g0799500 // Os04g0543900 // Os07g0684800 // Os07g0529600 // Os06g0131300 // Os04g0460600 // Os01g0679900 // Os12g0623900 // Os03g0764600 // Os09g0507200 // Os04g0656100 // Os07g0622200 // Os07g0437500 // Os03g0284100
2	GO:0006810	P	transport	10	133	1638	24075	0.42	1	// Os04g0656100 // Os12g0421000 // Os03g0152000 // Os03g0687000 // Os03g0363600 // Os02g0584800 // Os01g0239200 // Os06g0336200 // Os03g0103300 // Os03g0147400
2	GO:0006811	P	ion transport	5	133	408	24075	0.078	0.91	// Os02g0584800 // Os12g0421000 // Os03g0152000 // Os03g0147400 // Os04g0656100
2	GO:0006950	P	response to stress	9	133	873	24075	0.055	0.69	// Os01g0799500 // Os03g0353400 // Os02g0131100 // Os01g0270300 // Os07g0677300 // Os01g0739500 // Os08g0504700 // Os03g0121200 // Os07g0661400
2	GO:0007275	P	multicellular organismal development	7	133	27	24075	6.1e-10	6.8e-08	// Os12g0147800 // Os08g0531700 // Os07g0160100 // Os09g0507200 // Os05g0203800 // Os03g0602300 // Os01g0182600
2	GO:0008152	P	metabolic process	64	133	14398	24075	1	1	// Os01g0799500 // Os03g0183800 // Os08g0104600 // Os03g0749300 // Os03g0602300 // Os03g0742300 // Os11g0242800 // Os03g0261100 // Os07g0684800 // Os03g0183300 // Os04g0584600 // Os07g0677300 // Os04g0461600 // Os05g0366600 // Os03g0856000 // Os02g0626400 // Os04g0460600 // Os09g0507200 // Os03g0592500 // Os06g0131300 // Os08g0531700 // Os12g0189300 // Os12g0264500 // Os05g0548900 // Os05g0203800…
2	GO:0009056	P	catabolic process	6	133	433	24075	0.035	0.47	// Os11g0171300 // Os03g0261100 // Os06g0131300 // Os07g0677300 // Os02g0626400 // Os10g0465700
2	GO:0009058	P	biosynthetic process	20	133	6085	24075	1	1	// Os09g0507200 // Os03g0742300 // Os08g0531700 // Os03g0764600 // Os07g0684800 // Os04g0624600 // Os05g0203800 // Os02g0729700 // Os04g0656100 // Os07g0529600 // Os12g0623900 // Os02g0735200 // Os03g0183300 // Os05g0408900 // Os07g0622200 // Os02g0626400 // Os06g0131300 // Os04g0460600 // Os03g0837100 // Os03g0284100
2	GO:0009059	P	macromolecule biosynthetic process	12	133	5252	24075	1	1	// Os08g0531700 // Os03g0764600 // Os07g0684800 // Os04g0624600 // Os05g0203800 // Os02g0729700 // Os03g0837100 // Os03g0742300 // Os03g0183300 // Os04g0460600 // Os09g0507200 // Os03g0284100
2	GO:0009308	P	amine metabolic process	7	133	380	24075	0.0056	0.13	// Os12g0623900 // Os04g0543900 // Os07g0622200 // Os02g0735200 // Os06g0131300 // Os07g0437500 // Os02g0626400
2	GO:0009765	P	photosynthesis, light harvesting	9	133	16	24075	6.6e-15	2.3e-12	// Os09g0346500 // Os03g0592500 // Os02g0197600 // Os11g0242800 // Os07g0558400 // Os08g0435900 // Os01g0600900 // Os06g0320500 // Os04g0457000
2	GO:0009889	P	regulation of biosynthetic process	10	133	1564	24075	0.36	1	// Os08g0531700 // Os03g0764600 // Os07g0684800 // Os05g0203800 // Os02g0729700 // Os03g0742300 // Os03g0183300 // Os04g0460600 // Os09g0507200 // Os03g0284100
2	GO:0009987	P	cellular process	57	133	12839	24075	0.99	1	// Os01g0799500 // Os03g0183800 // Os11g0671000 // Os03g0742300 // Os11g0242800 // Os03g0261100 // Os03g0183300 // Os04g0584600 // Os07g0677300 // Os04g0461600 // Os02g0626400 // Os04g0460600 // Os12g0147800 // Os03g0592500 // Os08g0531700 // Os05g0203800 // Os02g0729700 // Os03g0837100 // Os02g0197600 // Os07g0558400 // Os08g0435900 // Os03g0319400 // Os01g0600900 // Os02g0469300 // Os09g0524800…
2	GO:0010467	P	gene expression	11	133	2424	24075	0.79	1	// Os08g0531700 // Os03g0764600 // Os07g0684800 // Os05g0203800 // Os02g0729700 // Os03g0742300 // Os03g0183300 // Os04g0460600 // Os09g0507200 // Os01g0679900 // Os03g0284100
2	GO:0010468	P	regulation of gene expression	10	133	1577	24075	0.37	1	// Os08g0531700 // Os03g0764600 // Os07g0684800 // Os05g0203800 // Os02g0729700 // Os03g0742300 // Os03g0183300 // Os04g0460600 // Os09g0507200 // Os03g0284100
2	GO:0010556	P	regulation of macromolecule biosynthetic process	10	133	1564	24075	0.36	1	// Os08g0531700 // Os03g0764600 // Os07g0684800 // Os05g0203800 // Os02g0729700 // Os03g0742300 // Os03g0183300 // Os04g0460600 // Os09g0507200 // Os03g0284100
2	GO:0015979	P	photosynthesis	10	133	115	24075	1.8e-09	1.1e-07	// Os09g0346500 // Os03g0592500 // Os01g0501800 // Os02g0197600 // Os11g0242800 // Os07g0558400 // Os08g0435900 // Os01g0600900 // Os06g0320500 // Os04g0457000
2	GO:0016070	P	RNA metabolic process	8	133	1088	24075	0.26	1	// Os08g0531700 // Os09g0507200 // Os05g0203800 // Os02g0729700 // Os03g0742300 // Os03g0183300 // Os01g0679900 // Os03g0284100
2	GO:0019219	P	regulation of nucleobase, nucleoside, nucleotide and nucleic acid metabolic process	10	133	1520	24075	0.33	1	// Os08g0531700 // Os03g0764600 // Os07g0684800 // Os05g0203800 // Os02g0729700 // Os03g0742300 // Os03g0183300 // Os04g0460600 // Os09g0507200 // Os03g0284100
2	GO:0019222	P	regulation of metabolic process	11	133	1664	24075	0.31	1	// Os08g0531700 // Os03g0764600 // Os07g0684800 // Os05g0203800 // Os02g0729700 // Os03g0742300 // Os03g0183300 // Os04g0460600 // Os01g0501800 // Os09g0507200 // Os03g0284100
2	GO:0019538	P	protein metabolic process	8	133	4333	24075	1	1	// Os03g0592500 // Os03g0183800 // Os05g0202500 // Os03g0292100 // Os04g0584600 // Os03g0319400 // Os03g0856000 // Os09g0524800
2	GO:0019684	P	photosynthesis, light reaction	10	133	47	24075	6.2e-13	1.1e-10	// Os09g0346500 // Os03g0592500 // Os01g0501800 // Os02g0197600 // Os11g0242800 // Os07g0558400 // Os08g0435900 // Os01g0600900 // Os06g0320500 // Os04g0457000
2	GO:0019752	P	carboxylic acid metabolic process	7	133	473	24075	0.017	0.31	// Os12g0623900 // Os04g0543900 // Os07g0622200 // Os02g0735200 // Os06g0131300 // Os07g0437500 // Os02g0626400
2	GO:0022414	P	reproductive process	5	133	114	24075	0.00051	0.018	// Os05g0203800 // Os08g0531700 // Os07g0160100 // Os09g0507200 // Os01g0182600
2	GO:0023046	P	signaling process	5	133	279	24075	0.02	0.32	// Os03g0742300 // Os02g0469300 // Os03g0319400 // Os11g0671000 // Os03g0284100
2	GO:0023052	P	signaling	5	133	447	24075	0.1	1	// Os03g0742300 // Os02g0469300 // Os03g0319400 // Os11g0671000 // Os03g0284100
2	GO:0023060	P	signal transmission	5	133	279	24075	0.02	0.32	// Os03g0742300 // Os02g0469300 // Os03g0319400 // Os11g0671000 // Os03g0284100
2	GO:0031323	P	regulation of cellular metabolic process	11	133	1593	24075	0.27	1	// Os08g0531700 // Os03g0764600 // Os07g0684800 // Os05g0203800 // Os02g0729700 // Os03g0742300 // Os03g0183300 // Os04g0460600 // Os01g0501800 // Os09g0507200 // Os03g0284100
2	GO:0031326	P	regulation of cellular biosynthetic process	10	133	1564	24075	0.36	1	// Os08g0531700 // Os03g0764600 // Os07g0684800 // Os05g0203800 // Os02g0729700 // Os03g0742300 // Os03g0183300 // Os04g0460600 // Os09g0507200 // Os03g0284100
2	GO:0032501	P	multicellular organismal process	7	133	154	24075	3.1e-05	0.0016	// Os12g0147800 // Os08g0531700 // Os07g0160100 // Os09g0507200 // Os05g0203800 // Os03g0602300 // Os01g0182600
2	GO:0032502	P	developmental process	7	133	28	24075	7.6e-10	6.8e-08	// Os12g0147800 // Os08g0531700 // Os07g0160100 // Os09g0507200 // Os05g0203800 // Os03g0602300 // Os01g0182600
2	GO:0032774	P	RNA biosynthetic process	7	133	788	24075	0.15	1	// Os08g0531700 // Os09g0507200 // Os05g0203800 // Os02g0729700 // Os03g0742300 // Os03g0183300 // Os03g0284100
2	GO:0034641	P	cellular nitrogen compound metabolic process	8	133	435	24075	0.0032	0.087	// Os12g0623900 // Os04g0543900 // Os07g0529600 // Os07g0622200 // Os02g0735200 // Os06g0131300 // Os07g0437500 // Os02g0626400
2	GO:0034645	P	cellular macromolecule biosynthetic process	12	133	5248	24075	1	1	// Os08g0531700 // Os03g0764600 // Os07g0684800 // Os04g0624600 // Os05g0203800 // Os02g0729700 // Os03g0837100 // Os03g0742300 // Os03g0183300 // Os04g0460600 // Os09g0507200 // Os03g0284100
2	GO:0042180	P	cellular ketone metabolic process	7	133	480	24075	0.018	0.31	// Os12g0623900 // Os04g0543900 // Os07g0622200 // Os02g0735200 // Os06g0131300 // Os07g0437500 // Os02g0626400
2	GO:0042221	P	response to chemical stimulus	8	133	301	24075	0.00032	0.013	// Os03g0353400 // Os11g0671000 // Os01g0270300 // Os07g0677300 // Os01g0739500 // Os03g0121200 // Os07g0661400 // Os03g0284100
2	GO:0043170	P	macromolecule metabolic process	26	133	10433	24075	1	1	// Os03g0183800 // Os03g0742300 // Os04g0624600 // Os04g0584600 // Os04g0461600 // Os03g0856000 // Os03g0592500 // Os08g0531700 // Os05g0203800 // Os02g0729700 // Os03g0319400 // Os09g0524800 // Os01g0799500 // Os05g0202500 // Os07g0684800 // Os03g0837100 // Os06g0697000 // Os04g0460600 // Os01g0679900 // Os11g0171300 // Os03g0764600 // Os09g0507200 // Os03g0183300 // Os03g0292100 // Os10g0465700…
2	GO:0043412	P	macromolecule modification	8	133	1979	24075	0.86	1	// Os03g0592500 // Os03g0183800 // Os05g0202500 // Os03g0292100 // Os04g0584600 // Os03g0319400 // Os01g0679900 // Os09g0524800
2	GO:0043436	P	oxoacid metabolic process	7	133	473	24075	0.017	0.31	// Os12g0623900 // Os04g0543900 // Os07g0622200 // Os02g0735200 // Os06g0131300 // Os07g0437500 // Os02g0626400
2	GO:0043687	P	post-translational protein modification	5	133	1815	24075	0.98	1	// Os03g0292100 // Os03g0592500 // Os04g0584600 // Os03g0319400 // Os03g0183800
2	GO:0044106	P	cellular amine metabolic process	7	133	333	24075	0.0028	0.083	// Os12g0623900 // Os04g0543900 // Os07g0622200 // Os02g0735200 // Os06g0131300 // Os07g0437500 // Os02g0626400
2	GO:0044237	P	cellular metabolic process	48	133	10696	24075	0.98	1	// Os01g0799500 // Os03g0183800 // Os03g0602300 // Os03g0742300 // Os11g0242800 // Os03g0261100 // Os03g0183300 // Os04g0584600 // Os07g0677300 // Os04g0461600 // Os02g0626400 // Os04g0460600 // Os09g0507200 // Os03g0592500 // Os08g0531700 // Os05g0203800 // Os02g0729700 // Os03g0837100 // Os02g0197600 // Os07g0558400 // Os08g0435900 // Os03g0319400 // Os01g0600900 // Os09g0524800 // Os09g0346500…
2	GO:0044238	P	primary metabolic process	41	133	11969	24075	1	1	// Os03g0183800 // Os03g0749300 // Os03g0742300 // Os03g0261100 // Os03g0183300 // Os04g0584600 // Os05g0408900 // Os04g0461600 // Os05g0366600 // Os03g0856000 // Os02g0626400 // Os03g0592500 // Os08g0531700 // Os05g0203800 // Os02g0729700 // Os03g0319400 // Os06g0573600 // Os09g0524800 // Os01g0799500 // Os05g0202500 // Os04g0543900 // Os07g0684800 // Os03g0837100 // Os06g0697000 // Os06g0131300…
2	GO:0044249	P	cellular biosynthetic process	19	133	5890	24075	1	1	// Os09g0507200 // Os12g0623900 // Os08g0531700 // Os03g0764600 // Os07g0684800 // Os04g0624600 // Os07g0529600 // Os02g0729700 // Os04g0656100 // Os03g0742300 // Os06g0131300 // Os02g0735200 // Os03g0183300 // Os05g0408900 // Os05g0203800 // Os07g0622200 // Os04g0460600 // Os03g0837100 // Os03g0284100
2	GO:0044260	P	cellular macromolecule metabolic process	24	133	9350	24075	1	1	// Os03g0183800 // Os03g0742300 // Os04g0624600 // Os04g0584600 // Os04g0461600 // Os03g0592500 // Os08g0531700 // Os05g0203800 // Os02g0729700 // Os03g0319400 // Os09g0524800 // Os01g0799500 // Os05g0202500 // Os07g0684800 // Os03g0837100 // Os06g0697000 // Os04g0460600 // Os01g0679900 // Os11g0171300 // Os03g0764600 // Os09g0507200 // Os03g0183300 // Os03g0292100 // Os03g0284100
2	GO:0044262	P	cellular carbohydrate metabolic process	5	133	385	24075	0.064	0.79	// Os04g0624600 // Os07g0139400 // Os11g0171300 // Os03g0837100 // Os06g0697000
2	GO:0044267	P	cellular protein metabolic process	7	133	2877	24075	1	1	// Os03g0592500 // Os03g0183800 // Os05g0202500 // Os03g0292100 // Os04g0584600 // Os03g0319400 // Os09g0524800
2	GO:0044271	P	cellular nitrogen compound biosynthetic process	5	133	231	24075	0.0099	0.21	// Os07g0622200 // Os12g0623900 // Os07g0529600 // Os02g0735200 // Os06g0131300
2	GO:0044281	P	small molecule metabolic process	11	133	1034	24075	0.029	0.43	// Os12g0623900 // Os04g0543900 // Os11g0171300 // Os04g0656100 // Os07g0622200 // Os07g0529600 // Os02g0735200 // Os07g0139400 // Os06g0131300 // Os07g0437500 // Os02g0626400
2	GO:0044283	P	small molecule biosynthetic process	5	133	320	24075	0.034	0.47	// Os07g0622200 // Os12g0623900 // Os07g0529600 // Os02g0735200 // Os06g0131300
2	GO:0045449	P	regulation of transcription	10	133	1513	24075	0.33	1	// Os08g0531700 // Os03g0764600 // Os07g0684800 // Os05g0203800 // Os02g0729700 // Os03g0742300 // Os03g0183300 // Os04g0460600 // Os09g0507200 // Os03g0284100
2	GO:0050789	P	regulation of biological process	16	133	2027	24075	0.095	1	// Os08g0531700 // Os07g0160100 // Os03g0764600 // Os07g0684800 // Os05g0203800 // Os02g0729700 // Os11g0671000 // Os03g0742300 // Os03g0183300 // Os03g0319400 // Os03g0311300 // Os01g0501800 // Os09g0507200 // Os02g0469300 // Os04g0460600 // Os03g0284100
2	GO:0050794	P	regulation of cellular process	15	133	1955	24075	0.12	1	// Os08g0531700 // Os03g0764600 // Os07g0684800 // Os05g0203800 // Os02g0729700 // Os11g0671000 // Os03g0742300 // Os03g0183300 // Os03g0319400 // Os03g0311300 // Os01g0501800 // Os09g0507200 // Os02g0469300 // Os04g0460600 // Os03g0284100
2	GO:0050896	P	response to stimulus	13	133	1026	24075	0.0048	0.12	// Os01g0799500 // Os03g0602300 // Os03g0353400 // Os11g0671000 // Os01g0270300 // Os07g0677300 // Os01g0739500 // Os08g0504700 // Os03g0121200 // Os07g0661400 // Os12g0284000 // Os02g0131100 // Os03g0284100
2	GO:0051171	P	regulation of nitrogen compound metabolic process	10	133	1520	24075	0.33	1	// Os08g0531700 // Os03g0764600 // Os07g0684800 // Os05g0203800 // Os02g0729700 // Os03g0742300 // Os03g0183300 // Os04g0460600 // Os09g0507200 // Os03g0284100
2	GO:0051179	P	localization	10	133	1651	24075	0.43	1	// Os04g0656100 // Os12g0421000 // Os03g0152000 // Os03g0687000 // Os03g0363600 // Os02g0584800 // Os01g0239200 // Os06g0336200 // Os03g0103300 // Os03g0147400
2	GO:0051234	P	establishment of localization	10	133	1638	24075	0.42	1	// Os04g0656100 // Os12g0421000 // Os03g0152000 // Os03g0687000 // Os03g0363600 // Os02g0584800 // Os01g0239200 // Os06g0336200 // Os03g0103300 // Os03g0147400
2	GO:0051252	P	regulation of RNA metabolic process	7	133	740	24075	0.12	1	// Os08g0531700 // Os09g0507200 // Os05g0203800 // Os02g0729700 // Os03g0742300 // Os03g0183300 // Os03g0284100
2	GO:0055114	P	oxidation reduction	8	133	1351	24075	0.47	1	// Os08g0104600 // Os04g0543900 // Os01g0734200 // Os03g0602300 // Os02g0703600 // Os01g0270300 // Os07g0677300 // Os03g0121200
2	GO:0060255	P	regulation of macromolecule metabolic process	10	133	1640	24075	0.42	1	// Os08g0531700 // Os03g0764600 // Os07g0684800 // Os05g0203800 // Os02g0729700 // Os03g0742300 // Os03g0183300 // Os04g0460600 // Os09g0507200 // Os03g0284100
2	GO:0065007	P	biological regulation	17	133	2125	24075	0.079	0.91	// Os08g0531700 // Os07g0160100 // Os03g0764600 // Os07g0684800 // Os05g0203800 // Os02g0729700 // Os11g0671000 // Os03g0742300 // Os03g0183300 // Os03g0319400 // Os03g0311300 // Os01g0501800 // Os09g0507200 // Os02g0469300 // Os03g0602300 // Os04g0460600 // Os03g0284100
2	GO:0080090	P	regulation of primary metabolic process	10	133	1626	24075	0.41	1	// Os08g0531700 // Os03g0764600 // Os07g0684800 // Os05g0203800 // Os02g0729700 // Os03g0742300 // Os03g0183300 // Os04g0460600 // Os09g0507200 // Os03g0284100
2	GO:0000166	F	nucleotide binding	9	133	3874	24075	1	1	// Os03g0183800 // Os01g0734200 // Os04g0656100 // Os10g0512800 // Os02g0735200 // Os04g0584600 // Os03g0319400 // Os04g0504800 // Os02g0469300
2	GO:0001882	F	nucleoside binding	8	133	3257	24075	1	1	// Os03g0183800 // Os01g0734200 // Os04g0656100 // Os10g0512800 // Os02g0735200 // Os04g0584600 // Os03g0319400 // Os02g0469300
2	GO:0001883	F	purine nucleoside binding	8	133	3247	24075	1	1	// Os03g0183800 // Os01g0734200 // Os04g0656100 // Os10g0512800 // Os02g0735200 // Os04g0584600 // Os03g0319400 // Os02g0469300
2	GO:0003676	F	nucleic acid binding	13	133	8251	24075	1	1	// Os08g0531700 // Os07g0160100 // Os03g0764600 // Os07g0684800 // Os05g0203800 // Os02g0729700 // Os09g0507200 // Os03g0183300 // Os04g0460600 // Os04g0461600 // Os08g0157600 // Os08g0504700 // Os04g0504800
2	GO:0003677	F	DNA binding	12	133	5059	24075	1	1	// Os08g0531700 // Os07g0160100 // Os03g0764600 // Os07g0684800 // Os05g0203800 // Os02g0729700 // Os03g0183300 // Os04g0460600 // Os04g0461600 // Os08g0157600 // Os08g0504700 // Os09g0507200
2	GO:0003700	F	transcription factor activity	5	133	651	24075	0.29	1	// Os03g0183300 // Os02g0729700 // Os08g0531700 // Os09g0507200 // Os05g0203800
2	GO:0003824	F	catalytic activity	50	133	12724	24075	1	1	// Os04g0206200 // Os03g0183800 // Os08g0205900 // Os03g0749300 // Os03g0602300 // Os03g0261100 // Os04g0624600 // Os04g0584600 // Os07g0677300 // Os03g0311300 // Os05g0366600 // Os03g0856000 // Os02g0626400 // Os08g0157500 // Os06g0131300 // Os12g0189300 // Os12g0264500 // Os05g0548900 // Os04g0531900 // Os02g0703600 // Os03g0319400 // Os12g0291100 // Os03g0121200 // Os06g0573600 // Os01g0799500…
2	GO:0004553	F	hydrolase activity, hydrolyzing O-glycosyl compounds	5	133	424	24075	0.088	1	// Os03g0749300 // Os06g0573600 // Os05g0366600 // Os10g0465700 // Os06g0697000
2	GO:0005215	F	transporter activity	6	133	941	24075	0.42	1	// Os04g0656100 // Os03g0687000 // Os03g0363600 // Os01g0239200 // Os06g0336200 // Os03g0147400
2	GO:0005488	F	binding	55	133	16823	24075	1	1	// Os03g0183800 // Os03g0602300 // Os08g0104600 // Os02g0735200 // Os03g0183300 // Os04g0584600 // Os07g0677300 // Os04g0461600 // Os05g0366600 // Os08g0157600 // Os03g0856000 // Os12g0284000 // Os08g0157500 // Os12g0147800 // Os03g0592500 // Os06g0131300 // Os08g0531700 // Os07g0684800 // Os05g0203800 // Os02g0729700 // Os12g0421000 // Os02g0703600 // Os03g0319400 // Os03g0121200 // Os09g0507200…
2	GO:0005506	F	iron ion binding	7	133	713	24075	0.1	1	// Os01g0734200 // Os03g0602300 // Os02g0703600 // Os01g0270300 // Os07g0677300 // Os03g0856000 // Os03g0121200
2	GO:0005509	F	calcium ion binding	6	133	316	24075	0.0089	0.43	// Os01g0734200 // Os01g0501800 // Os01g0270300 // Os04g0584600 // Os07g0677300 // Os03g0121200
2	GO:0005515	F	protein binding	12	133	2460	24075	0.72	1	// Os12g0147800 // Os03g0183800 // Os08g0531700 // Os03g0353400 // Os09g0524800 // Os03g0837100 // Os10g0512800 // Os03g0237600 // Os09g0507200 // Os07g0661400 // Os08g0157500 // Os02g0232500
2	GO:0005524	F	ATP binding	7	133	3085	24075	1	1	// Os03g0183800 // Os04g0656100 // Os10g0512800 // Os02g0735200 // Os04g0584600 // Os03g0319400 // Os02g0469300
2	GO:0008270	F	zinc ion binding	5	133	3939	24075	1	1	// Os10g0512800 // Os12g0623900 // Os03g0837100 // Os07g0160100 // Os08g0504700
2	GO:0009055	F	electron carrier activity	8	133	599	24075	0.019	0.69	// Os08g0104600 // Os04g0623300 // Os01g0734200 // Os03g0602300 // Os02g0703600 // Os01g0270300 // Os07g0677300 // Os03g0121200
2	GO:0016491	F	oxidoreductase activity	11	133	1672	24075	0.32	1	// Os04g0543900 // Os04g0623300 // Os01g0734200 // Os04g0531900 // Os03g0602300 // Os02g0703600 // Os01g0270300 // Os07g0677300 // Os03g0311300 // Os03g0856000 // Os03g0121200
2	GO:0016740	F	transferase activity	15	133	6190	24075	1	1	// Os03g0183800 // Os03g0837100 // Os05g0548900 // Os08g0205900 // Os07g0622200 // Os12g0623900 // Os06g0697000 // Os04g0624600 // Os04g0584600 // Os03g0319400 // Os02g0611800 // Os05g0408900 // Os01g0550300 // Os08g0157500 // Os02g0469300
2	GO:0016772	F	transferase activity, transferring phosphorus-containing groups	5	133	4781	24075	1	1	// Os04g0584600 // Os03g0319400 // Os03g0183800 // Os01g0550300 // Os02g0469300
2	GO:0016787	F	hydrolase activity	15	133	4901	24075	1	1	// Os01g0799500 // Os04g0206200 // Os03g0203200 // Os04g0656100 // Os10g0512800 // Os03g0749300 // Os03g0261100 // Os06g0697000 // Os03g0292100 // Os12g0566700 // Os05g0366600 // Os03g0856000 // Os06g0573600 // Os02g0734300 // Os10g0465700
2	GO:0016798	F	hydrolase activity, acting on glycosyl bonds	6	133	480	24075	0.052	1	// Os01g0799500 // Os03g0749300 // Os06g0697000 // Os05g0366600 // Os06g0573600 // Os10g0465700
2	GO:0016829	F	lyase activity	6	133	309	24075	0.008	0.43	// Os11g0171300 // Os06g0131300 // Os07g0437500 // Os12g0291100 // Os02g0626400 // Os12g0292400
2	GO:0016830	F	carbon-carbon lyase activity	5	133	99	24075	0.00028	0.04	// Os12g0292400 // Os06g0131300 // Os07g0437500 // Os11g0171300 // Os12g0291100
2	GO:0017076	F	purine nucleotide binding	8	133	3456	24075	1	1	// Os03g0183800 // Os01g0734200 // Os04g0656100 // Os10g0512800 // Os02g0735200 // Os04g0584600 // Os03g0319400 // Os02g0469300
2	GO:0020037	F	heme binding	5	133	600	24075	0.24	1	// Os03g0121200 // Os01g0270300 // Os07g0677300 // Os03g0602300 // Os02g0703600
2	GO:0030528	F	transcription regulator activity	7	133	987	24075	0.31	1	// Os08g0531700 // Os09g0507200 // Os05g0203800 // Os02g0729700 // Os03g0742300 // Os03g0183300 // Os03g0284100
2	GO:0030554	F	adenyl nucleotide binding	8	133	3247	24075	1	1	// Os03g0183800 // Os01g0734200 // Os04g0656100 // Os10g0512800 // Os02g0735200 // Os04g0584600 // Os03g0319400 // Os02g0469300
2	GO:0032553	F	ribonucleotide binding	7	133	3292	24075	1	1	// Os03g0183800 // Os04g0656100 // Os10g0512800 // Os02g0735200 // Os04g0584600 // Os03g0319400 // Os02g0469300
2	GO:0032555	F	purine ribonucleotide binding	7	133	3292	24075	1	1	// Os03g0183800 // Os04g0656100 // Os10g0512800 // Os02g0735200 // Os04g0584600 // Os03g0319400 // Os02g0469300
2	GO:0032559	F	adenyl ribonucleotide binding	7	133	3087	24075	1	1	// Os03g0183800 // Os04g0656100 // Os10g0512800 // Os02g0735200 // Os04g0584600 // Os03g0319400 // Os02g0469300
2	GO:0043167	F	ion binding	25	133	5700	24075	0.93	1	// Os03g0602300 // Os04g0584600 // Os07g0677300 // Os05g0366600 // Os03g0856000 // Os03g0592500 // Os12g0421000 // Os02g0703600 // Os01g0270300 // Os06g0573600 // Os01g0734200 // Os03g0837100 // Os10g0512800 // Os03g0152000 // Os03g0121200 // Os08g0504700 // Os12g0623900 // Os07g0160100 // Os01g0501800 // Os06g0131300 // Os03g0292100 // Os02g0584800 // Os08g0189100 // Os01g0200700 // Os10g0465700
2	GO:0043169	F	cation binding	25	133	5696	24075	0.93	1	// Os03g0602300 // Os04g0584600 // Os07g0677300 // Os05g0366600 // Os03g0856000 // Os03g0592500 // Os12g0421000 // Os02g0703600 // Os01g0270300 // Os06g0573600 // Os01g0734200 // Os03g0837100 // Os10g0512800 // Os03g0152000 // Os03g0121200 // Os08g0504700 // Os12g0623900 // Os07g0160100 // Os01g0501800 // Os06g0131300 // Os03g0292100 // Os02g0584800 // Os08g0189100 // Os01g0200700 // Os10g0465700
2	GO:0046872	F	metal ion binding	22	133	5476	24075	0.97	1	// Os03g0602300 // Os04g0584600 // Os07g0677300 // Os03g0856000 // Os03g0592500 // Os12g0421000 // Os02g0703600 // Os01g0270300 // Os01g0734200 // Os03g0837100 // Os10g0512800 // Os03g0152000 // Os03g0121200 // Os08g0504700 // Os12g0623900 // Os07g0160100 // Os01g0501800 // Os06g0131300 // Os03g0292100 // Os02g0584800 // Os08g0189100 // Os01g0200700
2	GO:0046906	F	tetrapyrrole binding	6	133	608	24075	0.12	1	// Os03g0592500 // Os03g0602300 // Os02g0703600 // Os01g0270300 // Os07g0677300 // Os03g0121200
2	GO:0046914	F	transition metal ion binding	14	133	4875	24075	1	1	// Os12g0623900 // Os07g0160100 // Os01g0734200 // Os03g0837100 // Os10g0512800 // Os03g0602300 // Os02g0703600 // Os03g0292100 // Os01g0270300 // Os07g0677300 // Os08g0504700 // Os03g0121200 // Os08g0189100 // Os03g0856000
2	GO:0005576	C	extracellular region	6	133	251	24075	0.003	0.014	// Os12g0147800 // Os10g0555900 // Os06g0697000 // Os07g0677300 // Os08g0189100 // Os06g0573600
2	GO:0005622	C	intracellular	88	133	4116	24075	9.5e-36	6.7e-35	// Os03g0261100 // Os05g0119300 // Os03g0183300 // Os03g0311300 // Os05g0366600 // Os08g0157600 // Os11g0147800 // Os03g0592500 // Os08g0531700 // Os05g0203800 // Os02g0197600 // Os11g0545300 // Os03g0319400 // Os03g0345300 // Os03g0121200 // Os09g0346500 // Os04g0543900 // Os05g0227600 // Os10g0512800 // Os07g0529600 // Os06g0697000 // Os02g0611800 // Os01g0859200 // Os03g0764600 // Os04g0624600…
2	GO:0005623	C	cell	104	133	5945	24075	5.7e-38	4.3e-37	// Os03g0261100 // Os05g0119300 // Os03g0183300 // Os03g0311300 // Os05g0366600 // Os08g0157600 // Os11g0147800 // Os03g0592500 // Os08g0531700 // Os05g0203800 // Os02g0197600 // Os11g0545300 // Os03g0246500 // Os03g0319400 // Os03g0345300 // Os01g0239200 // Os03g0121200 // Os09g0346500 // Os04g0543900 // Os05g0227600 // Os01g0734200 // Os10g0512800 // Os07g0529600 // Os06g0697000 // Os02g0611800…
2	GO:0005634	C	nucleus	11	133	1884	24075	0.47	1	// Os01g0739500 // Os08g0531700 // Os07g0160100 // Os03g0764600 // Os09g0507200 // Os05g0203800 // Os02g0729700 // Os03g0183300 // Os08g0157600 // Os01g0182600 // Os12g0284000
2	GO:0005737	C	cytoplasm	77	133	1263	24075	1.5e-61	7.9e-60	// Os11g0545300 // Os01g0799500 // Os03g0183800 // Os08g0205900 // Os08g0104600 // Os11g0707000 // Os11g0242800 // Os03g0261100 // Os12g0292400 // Os05g0119300 // Os03g0345300 // Os07g0677300 // Os03g0311300 // Os05g0366600 // Os03g0638200 // Os03g0227800 // Os03g0103300 // Os02g0626400 // Os12g0284000 // Os07g0181500 // Os12g0147800 // Os03g0592500 // Os11g0147800 // Os06g0320500 // Os04g0559200…
2	GO:0005739	C	mitochondrion	21	133	162	24075	6.2e-22	3.8e-21	// Os04g0543900 // Os03g0237600 // Os02g0640800 // Os04g0559200 // Os10g0501500 // Os08g0205900 // Os02g0197600 // Os11g0242800 // Os11g0545300 // Os07g0139400 // Os05g0119300 // Os08g0435900 // Os03g0319400 // Os03g0311300 // Os02g0611800 // Os03g0121200 // Os03g0227800 // Os01g0717000 // Os02g0734300 // Os06g0320500 // Os04g0244800
2	GO:0009507	C	chloroplast	14	133	23	24075	6.2e-23	4.1e-22	// Os09g0346500 // Os03g0592500 // Os07g0181500 // Os11g0171300 // Os02g0197600 // Os11g0242800 // Os07g0558400 // Os01g0773700 // Os08g0435900 // Os12g0291100 // Os01g0600900 // Os12g0292400 // Os06g0320500 // Os04g0457000
2	GO:0009536	C	plastid	30	133	37	24075	4e-51	8.3e-50	// Os01g0799500 // Os08g0104600 // Os11g0707000 // Os11g0242800 // Os04g0624600 // Os05g0408900 // Os03g0638200 // Os03g0203200 // Os03g0592500 // Os04g0414700 // Os02g0197600 // Os07g0558400 // Os08g0435900 // Os12g0291100 // Os01g0600900 // Os09g0346500 // Os07g0181500 // Os07g0529600 // Os01g0773700 // Os06g0199200 // Os04g0457000 // Os11g0171300 // Os01g0501800 // Os07g0622200 // Os03g0237600…
2	GO:0016020	C	membrane	36	133	2115	24075	8.2e-10	4.8e-09	// Os03g0183800 // Os03g0299600 // Os03g0602300 // Os11g0242800 // Os03g0687000 // Os03g0311300 // Os03g0638200 // Os10g0555900 // Os03g0592500 // Os07g0684800 // Os04g0531900 // Os02g0197600 // Os07g0558400 // Os02g0703600 // Os03g0246500 // Os08g0435900 // Os01g0239200 // Os01g0600900 // Os09g0346500 // Os01g0734200 // Os03g0837100 // Os03g0861100 // Os03g0363600 // Os01g0773700 // Os04g0460600…
2	GO:0016021	C	integral to membrane	13	133	752	24075	0.00031	0.0017	// Os03g0592500 // Os03g0183800 // Os01g0734200 // Os04g0656100 // Os03g0602300 // Os03g0363600 // Os02g0703600 // Os03g0292100 // Os03g0147400 // Os01g0239200 // Os06g0336200 // Os09g0425900 // Os03g0837100
2	GO:0016023	C	cytoplasmic membrane-bounded vesicle	26	133	26	24075	5.7e-46	6.6e-45	// Os03g0183800 // Os03g0749300 // Os03g0261100 // Os03g0345300 // Os07g0677300 // Os05g0366600 // Os03g0103300 // Os11g0147800 // Os12g0147800 // Os02g0703600 // Os01g0270300 // Os05g0363500 // Os06g0573600 // Os03g0650000 // Os05g0495300 // Os10g0555900 // Os05g0227600 // Os06g0697000 // Os09g0425900 // Os01g0859200 // Os05g0138300 // Os12g0621100 // Os12g0566700 // Os08g0189100 // Os03g0147400…
2	GO:0031224	C	intrinsic to membrane	13	133	775	24075	0.00041	0.0022	// Os03g0592500 // Os03g0183800 // Os01g0734200 // Os04g0656100 // Os03g0602300 // Os03g0363600 // Os02g0703600 // Os03g0292100 // Os03g0147400 // Os01g0239200 // Os06g0336200 // Os09g0425900 // Os03g0837100
2	GO:0031410	C	cytoplasmic vesicle	26	133	34	24075	7.7e-44	7.4e-43	// Os03g0183800 // Os03g0749300 // Os03g0261100 // Os03g0345300 // Os07g0677300 // Os05g0366600 // Os03g0103300 // Os11g0147800 // Os12g0147800 // Os02g0703600 // Os01g0270300 // Os05g0363500 // Os06g0573600 // Os03g0650000 // Os05g0495300 // Os10g0555900 // Os05g0227600 // Os06g0697000 // Os09g0425900 // Os01g0859200 // Os05g0138300 // Os12g0621100 // Os12g0566700 // Os08g0189100 // Os03g0147400…
2	GO:0031982	C	vesicle	26	133	34	24075	7.7e-44	7.4e-43	// Os03g0183800 // Os03g0749300 // Os03g0261100 // Os03g0345300 // Os07g0677300 // Os05g0366600 // Os03g0103300 // Os11g0147800 // Os12g0147800 // Os02g0703600 // Os01g0270300 // Os05g0363500 // Os06g0573600 // Os03g0650000 // Os05g0495300 // Os10g0555900 // Os05g0227600 // Os06g0697000 // Os09g0425900 // Os01g0859200 // Os05g0138300 // Os12g0621100 // Os12g0566700 // Os08g0189100 // Os03g0147400…
2	GO:0031988	C	membrane-bounded vesicle	26	133	26	24075	5.7e-46	6.6e-45	// Os03g0183800 // Os03g0749300 // Os03g0261100 // Os03g0345300 // Os07g0677300 // Os05g0366600 // Os03g0103300 // Os11g0147800 // Os12g0147800 // Os02g0703600 // Os01g0270300 // Os05g0363500 // Os06g0573600 // Os03g0650000 // Os05g0495300 // Os10g0555900 // Os05g0227600 // Os06g0697000 // Os09g0425900 // Os01g0859200 // Os05g0138300 // Os12g0621100 // Os12g0566700 // Os08g0189100 // Os03g0147400…
2	GO:0032991	C	macromolecular complex	7	133	1207	24075	0.5	1	// Os03g0592500 // Os01g0501800 // Os10g0512800 // Os03g0292100 // Os01g0773700 // Os12g0291100 // Os12g0292400
2	GO:0043226	C	organelle	86	133	2859	24075	4.7e-46	6.6e-45	// Os03g0183300 // Os03g0261100 // Os05g0119300 // Os03g0345300 // Os03g0311300 // Os05g0366600 // Os08g0157600 // Os11g0147800 // Os03g0592500 // Os08g0531700 // Os05g0203800 // Os02g0197600 // Os11g0545300 // Os03g0319400 // Os03g0121200 // Os09g0346500 // Os04g0543900 // Os05g0227600 // Os10g0512800 // Os07g0529600 // Os06g0697000 // Os02g0611800 // Os01g0859200 // Os03g0764600 // Os04g0624600…
2	GO:0043227	C	membrane-bounded organelle	85	133	2319	24075	5e-52	1.3e-50	// Os11g0545300 // Os01g0799500 // Os03g0183800 // Os08g0205900 // Os08g0104600 // Os01g0739500 // Os01g0270300 // Os11g0707000 // Os11g0242800 // Os03g0261100 // Os12g0292400 // Os05g0119300 // Os03g0345300 // Os07g0677300 // Os03g0311300 // Os05g0366600 // Os08g0157600 // Os03g0638200 // Os03g0227800 // Os03g0103300 // Os11g0147800 // Os12g0284000 // Os07g0181500 // Os12g0147800 // Os03g0592500…
2	GO:0043229	C	intracellular organelle	86	133	2859	24075	4.7e-46	6.6e-45	// Os03g0183300 // Os03g0261100 // Os05g0119300 // Os03g0345300 // Os03g0311300 // Os05g0366600 // Os08g0157600 // Os11g0147800 // Os03g0592500 // Os08g0531700 // Os05g0203800 // Os02g0197600 // Os11g0545300 // Os03g0319400 // Os03g0121200 // Os09g0346500 // Os04g0543900 // Os05g0227600 // Os10g0512800 // Os07g0529600 // Os06g0697000 // Os02g0611800 // Os01g0859200 // Os03g0764600 // Os04g0624600…
2	GO:0043231	C	intracellular membrane-bounded organelle	85	133	2296	24075	2.3e-52	8e-51	// Os11g0545300 // Os01g0799500 // Os03g0183800 // Os08g0205900 // Os08g0104600 // Os01g0739500 // Os01g0270300 // Os11g0707000 // Os11g0242800 // Os03g0261100 // Os12g0292400 // Os05g0119300 // Os03g0345300 // Os07g0677300 // Os03g0311300 // Os05g0366600 // Os08g0157600 // Os03g0638200 // Os03g0227800 // Os03g0103300 // Os11g0147800 // Os12g0284000 // Os07g0181500 // Os12g0147800 // Os03g0592500…
2	GO:0043234	C	protein complex	7	133	706	24075	0.099	0.45	// Os03g0592500 // Os01g0501800 // Os10g0512800 // Os03g0292100 // Os01g0773700 // Os12g0291100 // Os12g0292400
2	GO:0044422	C	organelle part	7	133	1521	24075	0.74	1	// Os03g0592500 // Os01g0501800 // Os10g0512800 // Os06g0336200 // Os01g0739500 // Os12g0291100 // Os12g0292400
2	GO:0044424	C	intracellular part	88	133	3529	24075	5.3e-41	4.6e-40	// Os03g0261100 // Os05g0119300 // Os03g0183300 // Os03g0311300 // Os05g0366600 // Os08g0157600 // Os11g0147800 // Os03g0592500 // Os08g0531700 // Os05g0203800 // Os02g0197600 // Os11g0545300 // Os03g0319400 // Os03g0345300 // Os03g0121200 // Os09g0346500 // Os04g0543900 // Os05g0227600 // Os10g0512800 // Os07g0529600 // Os06g0697000 // Os02g0611800 // Os01g0859200 // Os03g0764600 // Os04g0624600…
2	GO:0044425	C	membrane part	15	133	1007	24075	0.00051	0.0025	// Os03g0592500 // Os03g0183800 // Os01g0501800 // Os01g0734200 // Os04g0656100 // Os03g0602300 // Os03g0363600 // Os02g0703600 // Os03g0292100 // Os01g0773700 // Os03g0147400 // Os01g0239200 // Os06g0336200 // Os09g0425900 // Os03g0837100
2	GO:0044444	C	cytoplasmic part	75	133	966	24075	5.8e-67	6.1e-65	// Os11g0545300 // Os01g0799500 // Os03g0183800 // Os08g0205900 // Os08g0104600 // Os11g0707000 // Os11g0242800 // Os03g0261100 // Os12g0292400 // Os05g0119300 // Os03g0345300 // Os07g0677300 // Os03g0311300 // Os05g0366600 // Os03g0638200 // Os03g0227800 // Os03g0103300 // Os11g0147800 // Os12g0284000 // Os07g0181500 // Os12g0147800 // Os03g0592500 // Os07g0139400 // Os06g0320500 // Os04g0559200…
2	GO:0044446	C	intracellular organelle part	7	133	1521	24075	0.74	1	// Os03g0592500 // Os01g0501800 // Os10g0512800 // Os06g0336200 // Os01g0739500 // Os12g0291100 // Os12g0292400
2	GO:0044464	C	cell part	104	133	5945	24075	5.7e-38	4.3e-37	// Os03g0261100 // Os05g0119300 // Os03g0183300 // Os03g0311300 // Os05g0366600 // Os08g0157600 // Os11g0147800 // Os03g0592500 // Os08g0531700 // Os05g0203800 // Os02g0197600 // Os11g0545300 // Os03g0246500 // Os03g0319400 // Os03g0345300 // Os01g0239200 // Os03g0121200 // Os09g0346500 // Os04g0543900 // Os05g0227600 // Os01g0734200 // Os10g0512800 // Os07g0529600 // Os06g0697000 // Os02g0611800…
3	GO:0006139	P	nucleobase, nucleoside, nucleotide and nucleic acid metabolic process	13	102	6695	24075	1	1	// Os01g0911700 // Os02g0232000 // Os06g0657500 // Os08g0129200 // Os04g0653600 // Os03g0164300 // Os07g0182400 // Os03g0183300 // Os08g0408500 // Os11g0184900 // Os01g0884300 // Os09g0369000 // Os09g0526200
3	GO:0006323	P	DNA packaging	7	102	71	24075	4e-08	2.1e-06	// Os03g0279200 // Os01g0153100 // Os09g0553100 // Os04g0253000 // Os03g0799000 // Os05g0574300 // Os12g0530000
3	GO:0006325	P	chromatin organization	7	102	1018	24075	0.14	0.96	// Os03g0279200 // Os01g0153100 // Os09g0553100 // Os04g0253000 // Os03g0799000 // Os05g0574300 // Os12g0530000
3	GO:0006333	P	chromatin assembly or disassembly	7	102	982	24075	0.12	0.87	// Os03g0279200 // Os01g0153100 // Os09g0553100 // Os04g0253000 // Os03g0799000 // Os05g0574300 // Os12g0530000
3	GO:0006334	P	nucleosome assembly	7	102	70	24075	3.6e-08	2.1e-06	// Os03g0279200 // Os01g0153100 // Os09g0553100 // Os04g0253000 // Os03g0799000 // Os05g0574300 // Os12g0530000
3	GO:0006350	P	transcription	13	102	1629	24075	0.021	0.17	// Os01g0911700 // Os02g0232000 // Os06g0657500 // Os08g0129200 // Os04g0653600 // Os03g0164300 // Os07g0182400 // Os03g0183300 // Os08g0408500 // Os11g0184900 // Os01g0884300 // Os09g0369000 // Os09g0526200
3	GO:0006351	P	transcription, DNA-dependent	13	102	786	24075	3.2e-05	0.00049	// Os01g0911700 // Os02g0232000 // Os06g0657500 // Os08g0129200 // Os04g0653600 // Os03g0164300 // Os07g0182400 // Os03g0183300 // Os08g0408500 // Os11g0184900 // Os01g0884300 // Os09g0369000 // Os09g0526200
3	GO:0006355	P	regulation of transcription, DNA-dependent	13	102	737	24075	1.6e-05	0.00029	// Os01g0911700 // Os02g0232000 // Os06g0657500 // Os08g0129200 // Os04g0653600 // Os03g0164300 // Os07g0182400 // Os03g0183300 // Os08g0408500 // Os11g0184900 // Os01g0884300 // Os09g0369000 // Os09g0526200
3	GO:0006807	P	nitrogen compound metabolic process	15	102	7073	24075	1	1	// Os01g0911700 // Os02g0232000 // Os04g0173800 // Os06g0657500 // Os08g0129200 // Os04g0653600 // Os03g0164300 // Os07g0182400 // Os03g0183300 // Os08g0408500 // Os01g0681900 // Os11g0184900 // Os01g0884300 // Os09g0369000 // Os09g0526200
3	GO:0006810	P	transport	6	102	1638	24075	0.7	1	// Os03g0305600 // Os02g0700500 // Os09g0297400 // Os12g0115100 // Os06g0336200 // Os06g0168700
3	GO:0006950	P	response to stress	8	102	873	24075	0.033	0.24	// Os02g0232000 // Os03g0353400 // Os10g0437500 // Os01g0702500 // Os11g0454300 // Os09g0482100 // Os02g0684400 // Os11g0451700
3	GO:0006996	P	organelle organization	8	102	1129	24075	0.11	0.77	// Os03g0279200 // Os01g0153100 // Os09g0553100 // Os04g0253000 // Os03g0799000 // Os06g0308300 // Os05g0574300 // Os12g0530000
3	GO:0008152	P	metabolic process	28	102	14398	24075	1	1	// Os06g0696400 // Os06g0657500 // Os08g0129200 // Os04g0653600 // Os09g0539800 // Os03g0183300 // Os03g0268600 // Os08g0431300 // Os03g0192700 // Os11g0184900 // Os04g0390700 // Os07g0182400 // Os01g0911700 // Os08g0327400 // Os01g0705200 // Os09g0451000 // Os08g0408500 // Os09g0526200 // Os04g0173800 // Os03g0401300 // Os09g0482100 // Os01g0681900 // Os09g0369000 // Os02g0232000 // Os02g0530600…
3	GO:0009058	P	biosynthetic process	18	102	6085	24075	0.97	1	// Os01g0911700 // Os02g0232000 // Os06g0657500 // Os08g0129200 // Os07g0182400 // Os04g0653600 // Os08g0327400 // Os03g0164300 // Os09g0539800 // Os03g0401300 // Os03g0183300 // Os08g0408500 // Os03g0192700 // Os01g0681900 // Os11g0184900 // Os01g0884300 // Os09g0369000 // Os09g0526200
3	GO:0009059	P	macromolecule biosynthetic process	13	102	5252	24075	0.99	1	// Os01g0911700 // Os02g0232000 // Os06g0657500 // Os08g0129200 // Os04g0653600 // Os03g0164300 // Os07g0182400 // Os03g0183300 // Os08g0408500 // Os11g0184900 // Os01g0884300 // Os09g0369000 // Os09g0526200
3	GO:0009889	P	regulation of biosynthetic process	13	102	1564	24075	0.015	0.14	// Os01g0911700 // Os02g0232000 // Os06g0657500 // Os08g0129200 // Os04g0653600 // Os03g0164300 // Os07g0182400 // Os03g0183300 // Os08g0408500 // Os11g0184900 // Os01g0884300 // Os09g0369000 // Os09g0526200
3	GO:0009987	P	cellular process	33	102	12839	24075	1	1	// Os06g0696400 // Os04g0253000 // Os09g0553100 // Os06g0657500 // Os08g0129200 // Os04g0653600 // Os09g0539800 // Os03g0183300 // Os03g0268600 // Os03g0159600 // Os03g0192700 // Os11g0184900 // Os07g0182400 // Os01g0911700 // Os08g0327400 // Os01g0192000 // Os06g0308300 // Os09g0369000 // Os09g0526200 // Os01g0153100 // Os03g0401300 // Os09g0482100 // Os08g0408500 // Os01g0681900 // Os05g0574300…
3	GO:0010467	P	gene expression	13	102	2424	24075	0.23	1	// Os01g0911700 // Os02g0232000 // Os06g0657500 // Os08g0129200 // Os04g0653600 // Os03g0164300 // Os07g0182400 // Os03g0183300 // Os08g0408500 // Os11g0184900 // Os01g0884300 // Os09g0369000 // Os09g0526200
3	GO:0010468	P	regulation of gene expression	13	102	1577	24075	0.016	0.14	// Os01g0911700 // Os02g0232000 // Os06g0657500 // Os08g0129200 // Os04g0653600 // Os03g0164300 // Os07g0182400 // Os03g0183300 // Os08g0408500 // Os11g0184900 // Os01g0884300 // Os09g0369000 // Os09g0526200
3	GO:0010556	P	regulation of macromolecule biosynthetic process	13	102	1564	24075	0.015	0.14	// Os01g0911700 // Os02g0232000 // Os06g0657500 // Os08g0129200 // Os04g0653600 // Os03g0164300 // Os07g0182400 // Os03g0183300 // Os08g0408500 // Os11g0184900 // Os01g0884300 // Os09g0369000 // Os09g0526200
3	GO:0016043	P	cellular component organization	8	102	1240	24075	0.16	1	// Os03g0279200 // Os01g0153100 // Os09g0553100 // Os04g0253000 // Os03g0799000 // Os06g0308300 // Os05g0574300 // Os12g0530000
3	GO:0016070	P	RNA metabolic process	13	102	1088	24075	0.00074	0.01	// Os01g0911700 // Os02g0232000 // Os06g0657500 // Os08g0129200 // Os04g0653600 // Os03g0164300 // Os07g0182400 // Os03g0183300 // Os08g0408500 // Os11g0184900 // Os01g0884300 // Os09g0369000 // Os09g0526200
3	GO:0019219	P	regulation of nucleobase, nucleoside, nucleotide and nucleic acid metabolic process	13	102	1520	24075	0.012	0.13	// Os01g0911700 // Os02g0232000 // Os06g0657500 // Os08g0129200 // Os04g0653600 // Os03g0164300 // Os07g0182400 // Os03g0183300 // Os08g0408500 // Os11g0184900 // Os01g0884300 // Os09g0369000 // Os09g0526200
3	GO:0019222	P	regulation of metabolic process	13	102	1664	24075	0.024	0.18	// Os01g0911700 // Os02g0232000 // Os06g0657500 // Os08g0129200 // Os04g0653600 // Os03g0164300 // Os07g0182400 // Os03g0183300 // Os08g0408500 // Os11g0184900 // Os01g0884300 // Os09g0369000 // Os09g0526200
3	GO:0022607	P	cellular component assembly	8	102	172	24075	9.8e-07	2.3e-05	// Os03g0279200 // Os01g0153100 // Os09g0553100 // Os04g0253000 // Os03g0799000 // Os06g0308300 // Os05g0574300 // Os12g0530000
3	GO:0031323	P	regulation of cellular metabolic process	13	102	1593	24075	0.018	0.15	// Os01g0911700 // Os02g0232000 // Os06g0657500 // Os08g0129200 // Os04g0653600 // Os03g0164300 // Os07g0182400 // Os03g0183300 // Os08g0408500 // Os11g0184900 // Os01g0884300 // Os09g0369000 // Os09g0526200
3	GO:0031326	P	regulation of cellular biosynthetic process	13	102	1564	24075	0.015	0.14	// Os01g0911700 // Os02g0232000 // Os06g0657500 // Os08g0129200 // Os04g0653600 // Os03g0164300 // Os07g0182400 // Os03g0183300 // Os08g0408500 // Os11g0184900 // Os01g0884300 // Os09g0369000 // Os09g0526200
3	GO:0031497	P	chromatin assembly	7	102	70	24075	3.6e-08	2.1e-06	// Os03g0279200 // Os01g0153100 // Os09g0553100 // Os04g0253000 // Os03g0799000 // Os05g0574300 // Os12g0530000
3	GO:0032774	P	RNA biosynthetic process	13	102	788	24075	3.2e-05	0.00049	// Os01g0911700 // Os02g0232000 // Os06g0657500 // Os08g0129200 // Os04g0653600 // Os03g0164300 // Os07g0182400 // Os03g0183300 // Os08g0408500 // Os11g0184900 // Os01g0884300 // Os09g0369000 // Os09g0526200
3	GO:0034621	P	cellular macromolecular complex subunit organization	8	102	142	24075	2.4e-07	7.9e-06	// Os03g0279200 // Os01g0153100 // Os09g0553100 // Os04g0253000 // Os03g0799000 // Os06g0308300 // Os05g0574300 // Os12g0530000
3	GO:0034622	P	cellular macromolecular complex assembly	8	102	121	24075	7.6e-08	3.3e-06	// Os03g0279200 // Os01g0153100 // Os09g0553100 // Os04g0253000 // Os03g0799000 // Os06g0308300 // Os05g0574300 // Os12g0530000
3	GO:0034645	P	cellular macromolecule biosynthetic process	13	102	5248	24075	0.99	1	// Os01g0911700 // Os02g0232000 // Os06g0657500 // Os08g0129200 // Os04g0653600 // Os03g0164300 // Os07g0182400 // Os03g0183300 // Os08g0408500 // Os11g0184900 // Os01g0884300 // Os09g0369000 // Os09g0526200
3	GO:0034728	P	nucleosome organization	7	102	70	24075	3.6e-08	2.1e-06	// Os03g0279200 // Os01g0153100 // Os09g0553100 // Os04g0253000 // Os03g0799000 // Os05g0574300 // Os12g0530000
3	GO:0042221	P	response to chemical stimulus	10	102	301	24075	8e-07	2.2e-05	// Os01g0911700 // Os03g0353400 // Os11g0451700 // Os01g0702500 // Os11g0454300 // Os01g0192000 // Os03g0159600 // Os02g0684400 // Os05g0349800 // Os07g0182400
3	GO:0043170	P	macromolecule metabolic process	19	102	10433	24075	1	1	// Os01g0911700 // Os06g0696400 // Os02g0232000 // Os02g0530600 // Os04g0173800 // Os06g0657500 // Os08g0129200 // Os04g0653600 // Os08g0408500 // Os03g0164300 // Os07g0182400 // Os09g0451000 // Os03g0183300 // Os03g0268600 // Os09g0482100 // Os11g0184900 // Os01g0884300 // Os09g0369000 // Os09g0526200
3	GO:0043933	P	macromolecular complex subunit organization	8	102	190	24075	2e-06	4.3e-05	// Os03g0279200 // Os01g0153100 // Os09g0553100 // Os04g0253000 // Os03g0799000 // Os06g0308300 // Os05g0574300 // Os12g0530000
3	GO:0044085	P	cellular component biogenesis	8	102	239	24075	1e-05	0.0002	// Os03g0279200 // Os01g0153100 // Os09g0553100 // Os04g0253000 // Os03g0799000 // Os06g0308300 // Os05g0574300 // Os12g0530000
3	GO:0044237	P	cellular metabolic process	22	102	10696	24075	1	1	// Os06g0696400 // Os06g0657500 // Os08g0129200 // Os04g0653600 // Os09g0539800 // Os03g0183300 // Os03g0268600 // Os03g0192700 // Os11g0184900 // Os07g0182400 // Os01g0911700 // Os08g0327400 // Os08g0408500 // Os09g0526200 // Os03g0401300 // Os09g0482100 // Os01g0681900 // Os09g0369000 // Os02g0232000 // Os02g0530600 // Os03g0164300 // Os01g0884300
3	GO:0044238	P	primary metabolic process	24	102	11969	24075	1	1	// Os06g0696400 // Os06g0657500 // Os08g0129200 // Os04g0653600 // Os09g0539800 // Os03g0183300 // Os03g0268600 // Os03g0192700 // Os11g0184900 // Os07g0182400 // Os01g0911700 // Os08g0327400 // Os09g0451000 // Os08g0408500 // Os09g0526200 // Os04g0173800 // Os03g0401300 // Os09g0482100 // Os01g0681900 // Os09g0369000 // Os02g0232000 // Os02g0530600 // Os03g0164300 // Os01g0884300
3	GO:0044249	P	cellular biosynthetic process	17	102	5890	24075	0.98	1	// Os01g0911700 // Os02g0232000 // Os06g0657500 // Os08g0129200 // Os07g0182400 // Os04g0653600 // Os08g0327400 // Os03g0164300 // Os09g0539800 // Os03g0183300 // Os08g0408500 // Os03g0192700 // Os01g0681900 // Os11g0184900 // Os01g0884300 // Os09g0369000 // Os09g0526200
3	GO:0044260	P	cellular macromolecule metabolic process	17	102	9350	24075	1	1	// Os01g0911700 // Os06g0696400 // Os02g0232000 // Os02g0530600 // Os06g0657500 // Os08g0129200 // Os04g0653600 // Os08g0408500 // Os03g0164300 // Os07g0182400 // Os03g0183300 // Os03g0268600 // Os09g0482100 // Os11g0184900 // Os01g0884300 // Os09g0369000 // Os09g0526200
3	GO:0045449	P	regulation of transcription	13	102	1513	24075	0.012	0.13	// Os01g0911700 // Os02g0232000 // Os06g0657500 // Os08g0129200 // Os04g0653600 // Os03g0164300 // Os07g0182400 // Os03g0183300 // Os08g0408500 // Os11g0184900 // Os01g0884300 // Os09g0369000 // Os09g0526200
3	GO:0050789	P	regulation of biological process	16	102	2027	24075	0.011	0.13	// Os01g0911700 // Os02g0232000 // Os06g0657500 // Os08g0129200 // Os07g0182400 // Os04g0653600 // Os08g0408500 // Os03g0164300 // Os01g0884300 // Os03g0183300 // Os01g0192000 // Os06g0308300 // Os11g0184900 // Os02g0469300 // Os09g0369000 // Os09g0526200
3	GO:0050794	P	regulation of cellular process	16	102	1955	24075	0.0083	0.1	// Os01g0911700 // Os02g0232000 // Os06g0657500 // Os08g0129200 // Os07g0182400 // Os04g0653600 // Os08g0408500 // Os03g0164300 // Os01g0884300 // Os03g0183300 // Os01g0192000 // Os06g0308300 // Os11g0184900 // Os02g0469300 // Os09g0369000 // Os09g0526200
3	GO:0050896	P	response to stimulus	13	102	1026	24075	0.00043	0.0061	// Os01g0911700 // Os02g0232000 // Os03g0353400 // Os11g0451700 // Os10g0437500 // Os01g0702500 // Os11g0454300 // Os09g0482100 // Os01g0192000 // Os03g0159600 // Os02g0684400 // Os05g0349800 // Os07g0182400
3	GO:0051171	P	regulation of nitrogen compound metabolic process	13	102	1520	24075	0.012	0.13	// Os01g0911700 // Os02g0232000 // Os06g0657500 // Os08g0129200 // Os04g0653600 // Os03g0164300 // Os07g0182400 // Os03g0183300 // Os08g0408500 // Os11g0184900 // Os01g0884300 // Os09g0369000 // Os09g0526200
3	GO:0051179	P	localization	6	102	1651	24075	0.71	1	// Os03g0305600 // Os02g0700500 // Os09g0297400 // Os12g0115100 // Os06g0336200 // Os06g0168700
3	GO:0051234	P	establishment of localization	6	102	1638	24075	0.7	1	// Os03g0305600 // Os02g0700500 // Os09g0297400 // Os12g0115100 // Os06g0336200 // Os06g0168700
3	GO:0051252	P	regulation of RNA metabolic process	13	102	740	24075	1.7e-05	0.00029	// Os01g0911700 // Os02g0232000 // Os06g0657500 // Os08g0129200 // Os04g0653600 // Os03g0164300 // Os07g0182400 // Os03g0183300 // Os08g0408500 // Os11g0184900 // Os01g0884300 // Os09g0369000 // Os09g0526200
3	GO:0051276	P	chromosome organization	7	102	1024	24075	0.15	0.96	// Os03g0279200 // Os01g0153100 // Os09g0553100 // Os04g0253000 // Os03g0799000 // Os05g0574300 // Os12g0530000
3	GO:0060255	P	regulation of macromolecule metabolic process	13	102	1640	24075	0.022	0.17	// Os01g0911700 // Os02g0232000 // Os06g0657500 // Os08g0129200 // Os04g0653600 // Os03g0164300 // Os07g0182400 // Os03g0183300 // Os08g0408500 // Os11g0184900 // Os01g0884300 // Os09g0369000 // Os09g0526200
3	GO:0065003	P	macromolecular complex assembly	8	102	169	24075	8.6e-07	2.2e-05	// Os03g0279200 // Os01g0153100 // Os09g0553100 // Os04g0253000 // Os03g0799000 // Os06g0308300 // Os05g0574300 // Os12g0530000
3	GO:0065004	P	protein-DNA complex assembly	7	102	70	24075	3.6e-08	2.1e-06	// Os03g0279200 // Os01g0153100 // Os09g0553100 // Os04g0253000 // Os03g0799000 // Os05g0574300 // Os12g0530000
3	GO:0065007	P	biological regulation	17	102	2125	24075	0.0081	0.1	// Os01g0911700 // Os06g0308300 // Os02g0232000 // Os06g0657500 // Os08g0129200 // Os07g0182400 // Os04g0653600 // Os08g0408500 // Os03g0164300 // Os01g0884300 // Os03g0183300 // Os01g0192000 // Os03g0159600 // Os11g0184900 // Os02g0469300 // Os09g0369000 // Os09g0526200
3	GO:0071103	P	DNA conformation change	7	102	82	24075	1e-07	3.7e-06	// Os03g0279200 // Os01g0153100 // Os09g0553100 // Os04g0253000 // Os03g0799000 // Os05g0574300 // Os12g0530000
3	GO:0080090	P	regulation of primary metabolic process	13	102	1626	24075	0.02	0.17	// Os01g0911700 // Os02g0232000 // Os06g0657500 // Os08g0129200 // Os04g0653600 // Os03g0164300 // Os07g0182400 // Os03g0183300 // Os08g0408500 // Os11g0184900 // Os01g0884300 // Os09g0369000 // Os09g0526200
3	GO:0000166	F	nucleotide binding	5	102	3874	24075	1	1	// Os09g0482100 // Os01g0681900 // Os11g0703900 // Os03g0670700 // Os02g0469300
3	GO:0003676	F	nucleic acid binding	23	102	8251	24075	1	1	// Os04g0253000 // Os09g0553100 // Os06g0657500 // Os08g0129200 // Os04g0653600 // Os03g0183300 // Os08g0157600 // Os11g0184900 // Os01g0911700 // Os01g0192000 // Os08g0408500 // Os03g0799000 // Os12g0530000 // Os03g0670700 // Os09g0526200 // Os01g0153100 // Os09g0551600 // Os05g0574300 // Os09g0369000 // Os03g0279200 // Os02g0232000 // Os03g0164300 // Os01g0884300
3	GO:0003677	F	DNA binding	22	102	5059	24075	0.48	1	// Os04g0253000 // Os09g0553100 // Os06g0657500 // Os08g0129200 // Os04g0653600 // Os03g0183300 // Os08g0157600 // Os11g0184900 // Os01g0911700 // Os01g0192000 // Os08g0408500 // Os03g0799000 // Os12g0530000 // Os09g0526200 // Os01g0153100 // Os09g0551600 // Os05g0574300 // Os09g0369000 // Os03g0279200 // Os02g0232000 // Os03g0164300 // Os01g0884300
3	GO:0003700	F	transcription factor activity	7	102	651	24075	0.021	1	// Os02g0232000 // Os06g0657500 // Os04g0653600 // Os03g0183300 // Os08g0408500 // Os09g0369000 // Os09g0526200
3	GO:0003824	F	catalytic activity	17	102	12724	24075	1	1	// Os06g0696400 // Os03g0401300 // Os02g0530600 // Os04g0173800 // Os04g0553500 // Os08g0327400 // Os01g0705200 // Os09g0451000 // Os03g0268600 // Os08g0431300 // Os05g0542500 // Os03g0192700 // Os02g0601800 // Os05g0412800 // Os01g0681900 // Os04g0390700 // Os02g0469300
3	GO:0005215	F	transporter activity	5	102	941	24075	0.37	1	// Os03g0305600 // Os09g0539800 // Os09g0297400 // Os02g0700500 // Os06g0336200
3	GO:0005488	F	binding	43	102	16823	24075	1	1	// Os04g0253000 // Os09g0553100 // Os06g0657500 // Os08g0129200 // Os03g0327600 // Os04g0653600 // Os09g0539800 // Os12g0115100 // Os03g0183300 // Os03g0268600 // Os08g0431300 // Os08g0157600 // Os03g0192700 // Os11g0184900 // Os04g0390700 // Os07g0182400 // Os01g0911700 // Os03g0353400 // Os08g0327400 // Os09g0451000 // Os01g0192000 // Os03g0799000 // Os09g0369000 // Os03g0670700 // Os09g0526200…
3	GO:0005515	F	protein binding	5	102	2460	24075	0.98	1	// Os09g0482100 // Os06g0308300 // Os08g0431300 // Os03g0353400 // Os07g0182400
3	GO:0016491	F	oxidoreductase activity	6	102	1672	24075	0.72	1	// Os08g0327400 // Os01g0705200 // Os09g0451000 // Os05g0542500 // Os01g0681900 // Os04g0390700
3	GO:0016740	F	transferase activity	8	102	6190	24075	1	1	// Os06g0696400 // Os02g0530600 // Os08g0327400 // Os03g0401300 // Os08g0431300 // Os02g0601800 // Os05g0412800 // Os02g0469300
3	GO:0016787	F	hydrolase activity	5	102	4901	24075	1	1	// Os09g0451000 // Os04g0553500 // Os03g0268600 // Os06g0696400 // Os04g0173800
3	GO:0030528	F	transcription regulator activity	8	102	987	24075	0.059	1	// Os01g0911700 // Os02g0232000 // Os06g0657500 // Os04g0653600 // Os03g0183300 // Os08g0408500 // Os09g0369000 // Os09g0526200
3	GO:0043167	F	ion binding	8	102	5700	24075	1	1	// Os08g0129200 // Os10g0542100 // Os01g0192000 // Os09g0451000 // Os03g0268600 // Os05g0111300 // Os01g0681900 // Os01g0200700
3	GO:0043169	F	cation binding	8	102	5696	24075	1	1	// Os08g0129200 // Os10g0542100 // Os01g0192000 // Os09g0451000 // Os03g0268600 // Os05g0111300 // Os01g0681900 // Os01g0200700
3	GO:0046872	F	metal ion binding	8	102	5476	24075	1	1	// Os08g0129200 // Os10g0542100 // Os01g0192000 // Os09g0451000 // Os03g0268600 // Os05g0111300 // Os01g0681900 // Os01g0200700
3	GO:0046914	F	transition metal ion binding	6	102	4875	24075	1	1	// Os08g0129200 // Os10g0542100 // Os01g0192000 // Os09g0451000 // Os03g0268600 // Os01g0681900
3	GO:0000785	C	chromatin	7	102	973	24075	0.12	0.65	// Os03g0279200 // Os01g0153100 // Os09g0553100 // Os04g0253000 // Os03g0799000 // Os05g0574300 // Os12g0530000
3	GO:0000786	C	nucleosome	7	102	63	24075	1.9e-08	1.3e-07	// Os03g0279200 // Os01g0153100 // Os09g0553100 // Os04g0253000 // Os03g0799000 // Os05g0574300 // Os12g0530000
3	GO:0005622	C	intracellular	76	102	4116	24075	8.6e-37	1.3e-35	// Os04g0510900 // Os09g0324000 // Os04g0546500 // Os09g0553100 // Os03g0607200 // Os06g0657500 // Os03g0663800 // Os04g0653600 // Os01g0749000 // Os09g0539800 // Os03g0793700 // Os03g0183300 // Os03g0268600 // Os03g0159600 // Os08g0431300 // Os05g0438700 // Os08g0157600 // Os03g0192700 // Os03g0149200 // Os11g0184900 // Os04g0390700 // Os07g0182400 // Os06g0168700 // Os01g0911700 // Os07g0682400…
3	GO:0005623	C	cell	80	102	5945	24075	9.2e-30	7.6e-29	// Os04g0510900 // Os09g0324000 // Os04g0546500 // Os09g0553100 // Os02g0700500 // Os06g0657500 // Os04g0386700 // Os04g0553500 // Os04g0653600 // Os01g0749000 // Os09g0539800 // Os03g0793700 // Os08g0408500 // Os03g0183300 // Os03g0268600 // Os03g0159600 // Os08g0431300 // Os05g0438700 // Os08g0157600 // Os03g0192700 // Os03g0149200 // Os11g0184900 // Os04g0390700 // Os07g0182400 // Os03g0607200…
3	GO:0005634	C	nucleus	25	102	1884	24075	2.5e-07	1.7e-06	// Os04g0253000 // Os09g0553100 // Os06g0657500 // Os04g0653600 // Os03g0183300 // Os03g0159600 // Os08g0157600 // Os11g0184900 // Os07g0182400 // Os01g0911700 // Os01g0192000 // Os08g0408500 // Os06g0308300 // Os12g0530000 // Os09g0526200 // Os01g0153100 // Os09g0551600 // Os05g0574300 // Os09g0369000 // Os03g0279200 // Os02g0232000 // Os02g0530600 // Os03g0799000 // Os02g0684400 // Os01g0884300
3	GO:0005694	C	chromosome	7	102	1018	24075	0.14	0.71	// Os03g0279200 // Os01g0153100 // Os09g0553100 // Os04g0253000 // Os03g0799000 // Os05g0574300 // Os12g0530000
3	GO:0005737	C	cytoplasm	57	102	1263	24075	6e-45	1.9e-43	// Os04g0510900 // Os09g0324000 // Os04g0546500 // Os09g0553100 // Os03g0607200 // Os03g0663800 // Os01g0749000 // Os09g0539800 // Os03g0793700 // Os01g0915200 // Os03g0268600 // Os08g0431300 // Os11g0545300 // Os04g0599800 // Os03g0192700 // Os03g0149200 // Os04g0390700 // Os07g0182400 // Os06g0168700 // Os07g0682400 // Os02g0718600 // Os08g0327400 // Os05g0438700 // Os08g0408500 // Os08g0221300…
3	GO:0005739	C	mitochondrion	10	102	162	24075	3.1e-09	2.4e-08	// Os03g0305600 // Os09g0553100 // Os07g0682400 // Os01g0749000 // Os03g0227800 // Os11g0545300 // Os04g0610600 // Os03g0322900 // Os05g0361700 // Os03g0328900
3	GO:0009536	C	plastid	19	102	37	24075	4.8e-32	4.6e-31	// Os02g0700100 // Os09g0551600 // Os07g0182400 // Os03g0796600 // Os08g0408500 // Os09g0297400 // Os08g0327400 // Os05g0438700 // Os09g0539800 // Os02g0718600 // Os03g0268600 // Os08g0221300 // Os08g0431300 // Os09g0369000 // Os04g0599800 // Os04g0126900 // Os01g0198000 // Os05g0569500 // Os02g0474000
3	GO:0016020	C	membrane	10	102	2115	24075	0.41	1	// Os03g0305600 // Os09g0324000 // Os02g0700500 // Os04g0386700 // Os04g0553500 // Os04g0546500 // Os09g0297400 // Os08g0420600 // Os03g0699000 // Os06g0336200
3	GO:0016021	C	integral to membrane	5	102	752	24075	0.22	0.96	// Os09g0297400 // Os04g0546500 // Os03g0699000 // Os09g0324000 // Os06g0336200
3	GO:0016023	C	cytoplasmic membrane-bounded vesicle	20	102	26	24075	2.3e-36	2.8e-35	// Os04g0510900 // Os03g0663800 // Os02g0205200 // Os03g0607200 // Os04g0173800 // Os01g0915200 // Os02g0668500 // Os01g0201600 // Os08g0127900 // Os03g0793700 // Os03g0168100 // Os06g0696400 // Os11g0703900 // Os12g0115100 // Os12g0569200 // Os11g0582400 // Os03g0149200 // Os04g0390700 // Os04g0679400 // Os06g0168700
3	GO:0031224	C	intrinsic to membrane	5	102	775	24075	0.23	1	// Os09g0297400 // Os04g0546500 // Os03g0699000 // Os09g0324000 // Os06g0336200
3	GO:0031410	C	cytoplasmic vesicle	20	102	34	24075	1.3e-34	1.3e-33	// Os04g0510900 // Os03g0663800 // Os02g0205200 // Os03g0607200 // Os04g0173800 // Os01g0915200 // Os02g0668500 // Os01g0201600 // Os08g0127900 // Os03g0793700 // Os03g0168100 // Os06g0696400 // Os11g0703900 // Os12g0115100 // Os12g0569200 // Os11g0582400 // Os03g0149200 // Os04g0390700 // Os04g0679400 // Os06g0168700
3	GO:0031982	C	vesicle	20	102	34	24075	1.3e-34	1.3e-33	// Os04g0510900 // Os03g0663800 // Os02g0205200 // Os03g0607200 // Os04g0173800 // Os01g0915200 // Os02g0668500 // Os01g0201600 // Os08g0127900 // Os03g0793700 // Os03g0168100 // Os06g0696400 // Os11g0703900 // Os12g0115100 // Os12g0569200 // Os11g0582400 // Os03g0149200 // Os04g0390700 // Os04g0679400 // Os06g0168700
3	GO:0031988	C	membrane-bounded vesicle	20	102	26	24075	2.3e-36	2.8e-35	// Os04g0510900 // Os03g0663800 // Os02g0205200 // Os03g0607200 // Os04g0173800 // Os01g0915200 // Os02g0668500 // Os01g0201600 // Os08g0127900 // Os03g0793700 // Os03g0168100 // Os06g0696400 // Os11g0703900 // Os12g0115100 // Os12g0569200 // Os11g0582400 // Os03g0149200 // Os04g0390700 // Os04g0679400 // Os06g0168700
3	GO:0032991	C	macromolecular complex	9	102	1207	24075	0.071	0.4	// Os03g0279200 // Os06g0308300 // Os09g0553100 // Os04g0253000 // Os01g0153100 // Os03g0268600 // Os03g0799000 // Os05g0574300 // Os12g0530000
3	GO:0032993	C	protein-DNA complex	7	102	63	24075	1.9e-08	1.3e-07	// Os03g0279200 // Os01g0153100 // Os09g0553100 // Os04g0253000 // Os03g0799000 // Os05g0574300 // Os12g0530000
3	GO:0043226	C	organelle	73	102	2859	24075	3.9e-44	8.1e-43	// Os04g0510900 // Os09g0324000 // Os04g0546500 // Os09g0553100 // Os03g0607200 // Os06g0657500 // Os03g0663800 // Os04g0653600 // Os01g0749000 // Os09g0539800 // Os03g0793700 // Os03g0183300 // Os03g0268600 // Os03g0159600 // Os08g0431300 // Os05g0438700 // Os08g0157600 // Os03g0149200 // Os11g0184900 // Os04g0390700 // Os07g0182400 // Os06g0168700 // Os01g0911700 // Os07g0682400 // Os02g0718600…
3	GO:0043227	C	membrane-bounded organelle	73	102	2319	24075	2.3e-50	1.4e-48	// Os04g0510900 // Os09g0324000 // Os04g0546500 // Os09g0553100 // Os03g0607200 // Os06g0657500 // Os03g0663800 // Os04g0653600 // Os01g0749000 // Os09g0539800 // Os03g0793700 // Os03g0183300 // Os03g0268600 // Os03g0159600 // Os08g0431300 // Os05g0438700 // Os08g0157600 // Os03g0149200 // Os11g0184900 // Os04g0390700 // Os07g0182400 // Os06g0168700 // Os01g0911700 // Os07g0682400 // Os02g0718600…
3	GO:0043228	C	non-membrane-bounded organelle	9	102	1494	24075	0.18	0.85	// Os03g0279200 // Os06g0308300 // Os09g0553100 // Os03g0159600 // Os04g0253000 // Os01g0153100 // Os03g0799000 // Os05g0574300 // Os12g0530000
3	GO:0043229	C	intracellular organelle	73	102	2859	24075	3.9e-44	8.1e-43	// Os04g0510900 // Os09g0324000 // Os04g0546500 // Os09g0553100 // Os03g0607200 // Os06g0657500 // Os03g0663800 // Os04g0653600 // Os01g0749000 // Os09g0539800 // Os03g0793700 // Os03g0183300 // Os03g0268600 // Os03g0159600 // Os08g0431300 // Os05g0438700 // Os08g0157600 // Os03g0149200 // Os11g0184900 // Os04g0390700 // Os07g0182400 // Os06g0168700 // Os01g0911700 // Os07g0682400 // Os02g0718600…
3	GO:0043231	C	intracellular membrane-bounded organelle	73	102	2296	24075	1.1e-50	1.4e-48	// Os04g0510900 // Os09g0324000 // Os04g0546500 // Os09g0553100 // Os03g0607200 // Os06g0657500 // Os03g0663800 // Os04g0653600 // Os01g0749000 // Os09g0539800 // Os03g0793700 // Os03g0183300 // Os03g0268600 // Os03g0159600 // Os08g0431300 // Os05g0438700 // Os08g0157600 // Os03g0149200 // Os11g0184900 // Os04g0390700 // Os07g0182400 // Os06g0168700 // Os01g0911700 // Os07g0682400 // Os02g0718600…
3	GO:0043232	C	intracellular non-membrane-bounded organelle	9	102	1494	24075	0.18	0.85	// Os03g0279200 // Os06g0308300 // Os09g0553100 // Os03g0159600 // Os04g0253000 // Os01g0153100 // Os03g0799000 // Os05g0574300 // Os12g0530000
3	GO:0044422	C	organelle part	15	102	1521	24075	0.0019	0.012	// Os03g0279200 // Os03g0305600 // Os09g0553100 // Os03g0159600 // Os09g0324000 // Os01g0153100 // Os04g0546500 // Os06g0308300 // Os03g0799000 // Os03g0699000 // Os06g0336200 // Os04g0253000 // Os02g0684400 // Os05g0574300 // Os12g0530000
3	GO:0044424	C	intracellular part	76	102	3529	24075	1.7e-41	3e-40	// Os04g0510900 // Os09g0324000 // Os04g0546500 // Os09g0553100 // Os03g0607200 // Os06g0657500 // Os03g0663800 // Os04g0653600 // Os01g0749000 // Os09g0539800 // Os03g0793700 // Os03g0183300 // Os03g0268600 // Os03g0159600 // Os08g0431300 // Os05g0438700 // Os08g0157600 // Os03g0192700 // Os03g0149200 // Os11g0184900 // Os04g0390700 // Os07g0182400 // Os06g0168700 // Os01g0911700 // Os07g0682400…
3	GO:0044425	C	membrane part	5	102	1007	24075	0.42	1	// Os09g0297400 // Os04g0546500 // Os03g0699000 // Os09g0324000 // Os06g0336200
3	GO:0044427	C	chromosomal part	7	102	989	24075	0.13	0.67	// Os03g0279200 // Os01g0153100 // Os09g0553100 // Os04g0253000 // Os03g0799000 // Os05g0574300 // Os12g0530000
3	GO:0044444	C	cytoplasmic part	55	102	966	24075	2.8e-48	1.1e-46	// Os04g0510900 // Os09g0324000 // Os04g0546500 // Os09g0553100 // Os03g0607200 // Os03g0663800 // Os01g0749000 // Os09g0539800 // Os03g0793700 // Os01g0915200 // Os03g0268600 // Os08g0431300 // Os11g0545300 // Os04g0599800 // Os03g0149200 // Os04g0390700 // Os07g0182400 // Os06g0168700 // Os07g0682400 // Os02g0718600 // Os08g0327400 // Os05g0438700 // Os08g0408500 // Os08g0221300 // Os04g0610600…
3	GO:0044446	C	intracellular organelle part	15	102	1521	24075	0.0019	0.012	// Os03g0279200 // Os03g0305600 // Os09g0553100 // Os03g0159600 // Os09g0324000 // Os01g0153100 // Os04g0546500 // Os06g0308300 // Os03g0799000 // Os03g0699000 // Os06g0336200 // Os04g0253000 // Os02g0684400 // Os05g0574300 // Os12g0530000
3	GO:0044464	C	cell part	80	102	5945	24075	9.2e-30	7.6e-29	// Os04g0510900 // Os09g0324000 // Os04g0546500 // Os09g0553100 // Os02g0700500 // Os06g0657500 // Os04g0386700 // Os04g0553500 // Os04g0653600 // Os01g0749000 // Os09g0539800 // Os03g0793700 // Os08g0408500 // Os03g0183300 // Os03g0268600 // Os03g0159600 // Os08g0431300 // Os05g0438700 // Os08g0157600 // Os03g0192700 // Os03g0149200 // Os11g0184900 // Os04g0390700 // Os07g0182400 // Os03g0607200…
4	GO:0002250	P	adaptive immune response	5	98	5	24075	2.4e-10	3e-09	// Os07g0214300 // Os07g0213800 // Os07g0214600 // Os07g0214100 // Os07g0215500
4	GO:0002252	P	immune effector process	5	98	5	24075	2.4e-10	3e-09	// Os07g0214300 // Os07g0213800 // Os07g0214600 // Os07g0214100 // Os07g0215500
4	GO:0002376	P	immune system process	5	98	8	24075	1.2e-09	1.3e-08	// Os07g0214300 // Os07g0213800 // Os07g0214600 // Os07g0214100 // Os07g0215500
4	GO:0002437	P	inflammatory response to antigenic stimulus	5	98	5	24075	2.4e-10	3e-09	// Os07g0214300 // Os07g0213800 // Os07g0214600 // Os07g0214100 // Os07g0215500
4	GO:0002438	P	acute inflammatory response to antigenic stimulus	5	98	5	24075	2.4e-10	3e-09	// Os07g0214300 // Os07g0213800 // Os07g0214600 // Os07g0214100 // Os07g0215500
4	GO:0002443	P	leukocyte mediated immunity	5	98	5	24075	2.4e-10	3e-09	// Os07g0214300 // Os07g0213800 // Os07g0214600 // Os07g0214100 // Os07g0215500
4	GO:0002449	P	lymphocyte mediated immunity	5	98	5	24075	2.4e-10	3e-09	// Os07g0214300 // Os07g0213800 // Os07g0214600 // Os07g0214100 // Os07g0215500
4	GO:0002460	P	adaptive immune response based on somatic recombination of immune receptors built from immunoglobulin superfamily domains	5	98	5	24075	2.4e-10	3e-09	// Os07g0214300 // Os07g0213800 // Os07g0214600 // Os07g0214100 // Os07g0215500
4	GO:0002524	P	hypersensitivity	5	98	5	24075	2.4e-10	3e-09	// Os07g0214300 // Os07g0213800 // Os07g0214600 // Os07g0214100 // Os07g0215500
4	GO:0002526	P	acute inflammatory response	5	98	5	24075	2.4e-10	3e-09	// Os07g0214300 // Os07g0213800 // Os07g0214600 // Os07g0214100 // Os07g0215500
4	GO:0005975	P	carbohydrate metabolic process	5	98	833	24075	0.25	1	// Os06g0726400 // Os05g0405000 // Os08g0345800 // Os02g0601300 // Os10g0539600
4	GO:0006139	P	nucleobase, nucleoside, nucleotide and nucleic acid metabolic process	5	98	6695	24075	1	1	// Os01g0566900 // Os02g0321900 // Os02g0214500 // Os03g0424800 // Os07g0492000
4	GO:0006412	P	translation	24	98	595	24075	3.2e-17	5.4e-15	// Os08g0116500 // Os03g0424800 // Os03g0177400 // Os07g0529800 // Os03g0345200 // Os01g0896700 // Os07g0139600 // Os03g0234200 // Os12g0150100 // Os05g0459900 // Os01g0834600 // Os02g0519900 // Os01g0191100 // Os05g0355500 // Os08g0530200 // Os03g0408300 // Os03g0818400 // Os03g0177900 // Os02g0175600 // Os10g0411700 // Os02g0503400 // Os02g0321900 // Os10g0466700 // Os05g0160200
4	GO:0006414	P	translational elongation	5	98	39	24075	9.5e-07	8.5e-06	// Os03g0177400 // Os08g0116500 // Os03g0177900 // Os02g0519900 // Os01g0191100
4	GO:0006464	P	protein modification process	5	98	1929	24075	0.9	1	// Os06g0681400 // Os10g0539600 // Os03g0791800 // Os05g0160200 // Os03g0234200
4	GO:0006807	P	nitrogen compound metabolic process	6	98	7073	24075	1	1	// Os07g0492000 // Os02g0321900 // Os01g0760600 // Os03g0424800 // Os01g0566900 // Os02g0214500
4	GO:0006950	P	response to stress	10	98	873	24075	0.0031	0.022	// Os07g0214300 // Os03g0130300 // Os06g0612800 // Os12g0514100 // Os07g0214100 // Os07g0214600 // Os02g0268100 // Os07g0213800 // Os12g0244100 // Os07g0215500
4	GO:0006952	P	defense response	7	98	452	24075	0.0027	0.02	// Os07g0214300 // Os03g0130300 // Os07g0214100 // Os07g0214600 // Os02g0268100 // Os07g0213800 // Os07g0215500
4	GO:0006954	P	inflammatory response	5	98	5	24075	2.4e-10	3e-09	// Os07g0214300 // Os07g0213800 // Os07g0214600 // Os07g0214100 // Os07g0215500
4	GO:0006955	P	immune response	5	98	8	24075	1.2e-09	1.3e-08	// Os07g0214300 // Os07g0213800 // Os07g0214600 // Os07g0214100 // Os07g0215500
4	GO:0008152	P	metabolic process	40	98	14398	24075	1	1	// Os05g0405000 // Os08g0116500 // Os07g0492000 // Os06g0681400 // Os12g0244100 // Os01g0760600 // Os03g0424800 // Os03g0177400 // Os07g0529800 // Os03g0345200 // Os01g0896700 // Os02g0601300 // Os05g0459900 // Os08g0345800 // Os02g0519900 // Os03g0234200 // Os06g0726400 // Os12g0150100 // Os01g0663400 // Os01g0834600 // Os08g0530200 // Os01g0191100 // Os05g0355500 // Os01g0962400 // Os10g0466700…
4	GO:0009058	P	biosynthetic process	31	98	6085	24075	0.094	0.58	// Os05g0405000 // Os08g0116500 // Os07g0492000 // Os01g0760600 // Os03g0424800 // Os03g0177400 // Os07g0529800 // Os03g0345200 // Os01g0896700 // Os07g0139600 // Os08g0345800 // Os02g0519900 // Os03g0234200 // Os12g0150100 // Os05g0459900 // Os01g0834600 // Os08g0530200 // Os01g0191100 // Os05g0355500 // Os10g0466700 // Os03g0408300 // Os03g0818400 // Os10g0390500 // Os03g0177900 // Os02g0175600…
4	GO:0009059	P	macromolecule biosynthetic process	28	98	5252	24075	0.071	0.45	// Os05g0405000 // Os08g0116500 // Os03g0424800 // Os03g0177400 // Os07g0529800 // Os03g0345200 // Os01g0896700 // Os07g0139600 // Os08g0345800 // Os03g0234200 // Os12g0150100 // Os05g0459900 // Os01g0834600 // Os02g0519900 // Os01g0191100 // Os05g0355500 // Os08g0530200 // Os03g0408300 // Os03g0818400 // Os03g0177900 // Os02g0175600 // Os10g0411700 // Os02g0503400 // Os02g0321900 // Os10g0539600…
4	GO:0009605	P	response to external stimulus	5	98	25	24075	1.3e-07	1.2e-06	// Os07g0214300 // Os07g0213800 // Os07g0214600 // Os07g0214100 // Os07g0215500
4	GO:0009611	P	response to wounding	5	98	21	24075	6.1e-08	6.1e-07	// Os07g0214300 // Os07g0213800 // Os07g0214600 // Os07g0214100 // Os07g0215500
4	GO:0009987	P	cellular process	42	98	12839	24075	0.99	1	// Os05g0405000 // Os08g0116500 // Os06g0653900 // Os07g0492000 // Os06g0681400 // Os12g0244100 // Os01g0760600 // Os11g0199200 // Os03g0177400 // Os07g0529800 // Os03g0345200 // Os01g0896700 // Os02g0601300 // Os05g0459900 // Os08g0345800 // Os02g0519900 // Os03g0234200 // Os12g0150100 // Os07g0139600 // Os01g0834600 // Os08g0530200 // Os01g0191100 // Os05g0355500 // Os02g0178400 // Os01g0962400…
4	GO:0010467	P	gene expression	25	98	2424	24075	1.1e-05	8.7e-05	// Os08g0116500 // Os03g0424800 // Os03g0177400 // Os07g0529800 // Os03g0345200 // Os01g0896700 // Os07g0139600 // Os03g0234200 // Os12g0150100 // Os05g0459900 // Os01g0834600 // Os02g0519900 // Os01g0191100 // Os05g0355500 // Os08g0530200 // Os03g0408300 // Os03g0818400 // Os03g0177900 // Os02g0175600 // Os10g0411700 // Os02g0503400 // Os02g0321900 // Os10g0466700 // Os05g0160200 // Os02g0214500
4	GO:0016064	P	immunoglobulin mediated immune response	5	98	5	24075	2.4e-10	3e-09	// Os07g0214300 // Os07g0213800 // Os07g0214600 // Os07g0214100 // Os07g0215500
4	GO:0016068	P	type I hypersensitivity	5	98	5	24075	2.4e-10	3e-09	// Os07g0214300 // Os07g0213800 // Os07g0214600 // Os07g0214100 // Os07g0215500
4	GO:0019538	P	protein metabolic process	30	98	4333	24075	0.0017	0.013	// Os08g0116500 // Os06g0681400 // Os12g0244100 // Os03g0424800 // Os03g0177400 // Os07g0529800 // Os03g0345200 // Os01g0896700 // Os07g0139600 // Os02g0519900 // Os03g0234200 // Os05g0459900 // Os12g0150100 // Os01g0663400 // Os01g0834600 // Os08g0530200 // Os01g0191100 // Os05g0355500 // Os01g0962400 // Os10g0466700 // Os03g0408300 // Os03g0818400 // Os03g0791800 // Os03g0177900 // Os02g0175600…
4	GO:0019724	P	B cell mediated immunity	5	98	5	24075	2.4e-10	3e-09	// Os07g0214300 // Os07g0213800 // Os07g0214600 // Os07g0214100 // Os07g0215500
4	GO:0034645	P	cellular macromolecule biosynthetic process	28	98	5248	24075	0.07	0.45	// Os05g0405000 // Os08g0116500 // Os03g0424800 // Os03g0177400 // Os07g0529800 // Os03g0345200 // Os01g0896700 // Os07g0139600 // Os08g0345800 // Os03g0234200 // Os12g0150100 // Os05g0459900 // Os01g0834600 // Os02g0519900 // Os01g0191100 // Os05g0355500 // Os08g0530200 // Os03g0408300 // Os03g0818400 // Os03g0177900 // Os02g0175600 // Os10g0411700 // Os02g0503400 // Os02g0321900 // Os10g0539600…
4	GO:0043170	P	macromolecule metabolic process	33	98	10433	24075	0.98	1	// Os05g0405000 // Os08g0116500 // Os06g0681400 // Os12g0244100 // Os03g0424800 // Os03g0177400 // Os07g0529800 // Os03g0345200 // Os01g0896700 // Os07g0139600 // Os08g0345800 // Os02g0519900 // Os03g0234200 // Os05g0459900 // Os12g0150100 // Os01g0663400 // Os01g0834600 // Os08g0530200 // Os01g0191100 // Os05g0355500 // Os01g0962400 // Os10g0466700 // Os03g0408300 // Os03g0818400 // Os03g0791800…
4	GO:0043412	P	macromolecule modification	5	98	1979	24075	0.91	1	// Os06g0681400 // Os10g0539600 // Os03g0791800 // Os05g0160200 // Os03g0234200
4	GO:0044237	P	cellular metabolic process	37	98	10696	24075	0.92	1	// Os05g0405000 // Os08g0116500 // Os07g0492000 // Os06g0681400 // Os12g0244100 // Os01g0760600 // Os03g0424800 // Os03g0177400 // Os07g0529800 // Os03g0345200 // Os01g0896700 // Os02g0601300 // Os05g0459900 // Os08g0345800 // Os02g0519900 // Os03g0234200 // Os12g0150100 // Os07g0139600 // Os01g0834600 // Os08g0530200 // Os01g0191100 // Os05g0355500 // Os01g0962400 // Os10g0466700 // Os03g0408300…
4	GO:0044238	P	primary metabolic process	38	98	11969	24075	0.99	1	// Os05g0405000 // Os08g0116500 // Os07g0492000 // Os06g0681400 // Os12g0244100 // Os01g0760600 // Os03g0424800 // Os03g0177400 // Os07g0529800 // Os03g0345200 // Os01g0896700 // Os02g0601300 // Os05g0459900 // Os08g0345800 // Os02g0519900 // Os03g0234200 // Os06g0726400 // Os12g0150100 // Os01g0663400 // Os01g0834600 // Os08g0530200 // Os01g0191100 // Os05g0355500 // Os01g0962400 // Os10g0466700…
4	GO:0044249	P	cellular biosynthetic process	29	98	5890	24075	0.14	0.86	// Os05g0405000 // Os08g0116500 // Os07g0492000 // Os03g0424800 // Os03g0177400 // Os07g0529800 // Os03g0345200 // Os01g0896700 // Os07g0139600 // Os08g0345800 // Os03g0234200 // Os12g0150100 // Os05g0459900 // Os01g0834600 // Os02g0519900 // Os01g0191100 // Os05g0355500 // Os08g0530200 // Os03g0408300 // Os03g0818400 // Os03g0177900 // Os02g0175600 // Os10g0411700 // Os02g0503400 // Os02g0321900…
4	GO:0044260	P	cellular macromolecule metabolic process	32	98	9350	24075	0.91	1	// Os05g0405000 // Os08g0116500 // Os06g0681400 // Os12g0244100 // Os03g0424800 // Os03g0177400 // Os07g0529800 // Os03g0345200 // Os01g0896700 // Os07g0139600 // Os08g0345800 // Os02g0519900 // Os03g0234200 // Os12g0150100 // Os05g0459900 // Os01g0834600 // Os08g0530200 // Os01g0191100 // Os05g0355500 // Os01g0962400 // Os10g0466700 // Os03g0408300 // Os03g0818400 // Os03g0791800 // Os03g0177900…
4	GO:0044267	P	cellular protein metabolic process	29	98	2877	24075	2.6e-06	2.2e-05	// Os08g0116500 // Os06g0681400 // Os12g0244100 // Os03g0424800 // Os03g0177400 // Os07g0529800 // Os03g0345200 // Os01g0896700 // Os07g0139600 // Os03g0234200 // Os12g0150100 // Os05g0459900 // Os01g0834600 // Os02g0519900 // Os01g0191100 // Os05g0355500 // Os01g0962400 // Os08g0530200 // Os03g0408300 // Os03g0818400 // Os03g0791800 // Os03g0177900 // Os02g0175600 // Os10g0411700 // Os02g0503400…
4	GO:0050896	P	response to stimulus	11	98	1026	24075	0.0032	0.022	// Os07g0214300 // Os05g0405000 // Os03g0130300 // Os06g0612800 // Os12g0514100 // Os07g0214100 // Os07g0214600 // Os02g0268100 // Os07g0213800 // Os12g0244100 // Os07g0215500
4	GO:0000166	F	nucleotide binding	12	98	3874	24075	0.88	1	// Os05g0405000 // Os02g0115900 // Os07g0492000 // Os10g0539600 // Os11g0247300 // Os03g0177400 // Os08g0345800 // Os03g0726100 // Os02g0519900 // Os12g0244100 // Os03g0177900 // Os02g0601300
4	GO:0001882	F	nucleoside binding	6	98	3257	24075	0.99	1	// Os05g0405000 // Os02g0115900 // Os08g0345800 // Os12g0244100 // Os07g0492000 // Os10g0539600
4	GO:0001883	F	purine nucleoside binding	6	98	3247	24075	0.99	1	// Os05g0405000 // Os02g0115900 // Os08g0345800 // Os12g0244100 // Os07g0492000 // Os10g0539600
4	GO:0003676	F	nucleic acid binding	10	98	8251	24075	1	1	// Os06g0612800 // Os02g0321900 // Os03g0424800 // Os01g0566900 // Os03g0177400 // Os07g0529800 // Os03g0177900 // Os02g0519900 // Os01g0896700 // Os02g0214500
4	GO:0003735	F	structural constituent of ribosome	20	98	396	24075	3.3e-16	1.2e-14	// Os02g0175600 // Os08g0116500 // Os03g0408300 // Os10g0411700 // Os03g0234200 // Os02g0321900 // Os03g0818400 // Os02g0503400 // Os12g0150100 // Os03g0424800 // Os07g0139600 // Os05g0355500 // Os01g0834600 // Os08g0530200 // Os01g0191100 // Os03g0345200 // Os01g0896700 // Os05g0160200 // Os05g0459900 // Os10g0466700
4	GO:0003824	F	catalytic activity	19	98	12724	24075	1	1	// Os05g0400400 // Os05g0405000 // Os07g0492000 // Os06g0726400 // Os10g0539600 // Os10g0390500 // Os01g0760600 // Os11g0247300 // Os11g0199200 // Os01g0663400 // Os01g0566900 // Os03g0177400 // Os08g0345800 // Os03g0791800 // Os03g0726100 // Os02g0519900 // Os06g0708500 // Os03g0177900 // Os02g0601300
4	GO:0003924	F	GTPase activity	5	98	117	24075	0.00014	0.0022	// Os03g0177900 // Os03g0177400 // Os03g0726100 // Os02g0519900 // Os11g0247300
4	GO:0004857	F	enzyme inhibitor activity	12	98	157	24075	4.4e-12	8.9e-11	// Os07g0206400 // Os07g0214300 // Os07g0216600 // Os07g0214100 // Os07g0216700 // Os07g0214600 // Os07g0213800 // Os07g0206500 // Os05g0499100 // Os12g0269200 // Os07g0215500 // Os07g0219300
4	GO:0004866	F	endopeptidase inhibitor activity	12	98	72	24075	8.7e-16	2e-14	// Os07g0206400 // Os07g0214300 // Os07g0216600 // Os07g0214100 // Os07g0216700 // Os07g0214600 // Os07g0213800 // Os07g0206500 // Os05g0499100 // Os12g0269200 // Os07g0215500 // Os07g0219300
4	GO:0004867	F	serine-type endopeptidase inhibitor activity	12	98	60	24075	1.2e-16	5.8e-15	// Os07g0206400 // Os07g0214300 // Os07g0216600 // Os07g0214100 // Os07g0216700 // Os07g0214600 // Os07g0213800 // Os07g0206500 // Os05g0499100 // Os12g0269200 // Os07g0215500 // Os07g0219300
4	GO:0005198	F	structural molecule activity	22	98	462	24075	2.9e-17	2e-15	// Os08g0116500 // Os03g0424800 // Os03g0345200 // Os01g0896700 // Os07g0139600 // Os03g0234200 // Os12g0150100 // Os05g0459900 // Os01g0834600 // Os08g0530200 // Os01g0191100 // Os05g0355500 // Os10g0466700 // Os03g0408300 // Os03g0818400 // Os11g0247300 // Os03g0726100 // Os02g0175600 // Os10g0411700 // Os02g0503400 // Os02g0321900 // Os05g0160200
4	GO:0005215	F	transporter activity	5	98	941	24075	0.34	1	// Os05g0111200 // Os02g0202400 // Os05g0400400 // Os06g0653900 // Os02g0178400
4	GO:0005488	F	binding	26	98	16823	24075	1	1	// Os05g0405000 // Os06g0653900 // Os07g0492000 // Os12g0244100 // Os01g0760600 // Os03g0424800 // Os03g0177400 // Os07g0529800 // Os01g0896700 // Os02g0601300 // Os08g0345800 // Os06g0726400 // Os02g0202400 // Os02g0519900 // Os02g0178400 // Os02g0115900 // Os11g0247300 // Os10g0390500 // Os03g0726100 // Os02g0321900 // Os10g0539600 // Os01g0566900 // Os06g0612800 // Os03g0177900 // Os11g0660500…
4	GO:0005524	F	ATP binding	6	98	3085	24075	0.99	1	// Os05g0405000 // Os02g0115900 // Os08g0345800 // Os12g0244100 // Os07g0492000 // Os10g0539600
4	GO:0005525	F	GTP binding	5	98	207	24075	0.0017	0.022	// Os03g0177900 // Os03g0177400 // Os03g0726100 // Os02g0519900 // Os11g0247300
4	GO:0016462	F	pyrophosphatase activity	5	98	743	24075	0.19	1	// Os03g0177900 // Os03g0177400 // Os03g0726100 // Os02g0519900 // Os11g0247300
4	GO:0016740	F	transferase activity	6	98	6190	24075	1	1	// Os05g0405000 // Os08g0345800 // Os10g0539600 // Os01g0760600 // Os10g0390500 // Os07g0492000
4	GO:0016787	F	hydrolase activity	8	98	4901	24075	1	1	// Os06g0726400 // Os11g0247300 // Os01g0663400 // Os01g0566900 // Os03g0177400 // Os03g0726100 // Os02g0519900 // Os03g0177900
4	GO:0016817	F	hydrolase activity, acting on acid anhydrides	5	98	764	24075	0.2	1	// Os03g0177900 // Os03g0177400 // Os03g0726100 // Os02g0519900 // Os11g0247300
4	GO:0016818	F	hydrolase activity, acting on acid anhydrides, in phosphorus-containing anhydrides	5	98	759	24075	0.2	1	// Os03g0177900 // Os03g0177400 // Os03g0726100 // Os02g0519900 // Os11g0247300
4	GO:0017076	F	purine nucleotide binding	11	98	3456	24075	0.85	1	// Os05g0405000 // Os02g0115900 // Os07g0492000 // Os10g0539600 // Os11g0247300 // Os03g0177400 // Os08g0345800 // Os03g0726100 // Os02g0519900 // Os12g0244100 // Os03g0177900
4	GO:0017111	F	nucleoside-triphosphatase activity	5	98	726	24075	0.18	1	// Os03g0177900 // Os03g0177400 // Os03g0726100 // Os02g0519900 // Os11g0247300
4	GO:0019001	F	guanyl nucleotide binding	5	98	211	24075	0.0019	0.022	// Os03g0177900 // Os03g0177400 // Os03g0726100 // Os02g0519900 // Os11g0247300
4	GO:0030234	F	enzyme regulator activity	12	98	255	24075	9e-10	1.6e-08	// Os07g0206400 // Os07g0214300 // Os07g0216600 // Os07g0214100 // Os07g0216700 // Os07g0214600 // Os07g0213800 // Os07g0206500 // Os05g0499100 // Os12g0269200 // Os07g0215500 // Os07g0219300
4	GO:0030414	F	peptidase inhibitor activity	12	98	72	24075	8.7e-16	2e-14	// Os07g0206400 // Os07g0214300 // Os07g0216600 // Os07g0214100 // Os07g0216700 // Os07g0214600 // Os07g0213800 // Os07g0206500 // Os05g0499100 // Os12g0269200 // Os07g0215500 // Os07g0219300
4	GO:0030554	F	adenyl nucleotide binding	6	98	3247	24075	0.99	1	// Os05g0405000 // Os02g0115900 // Os08g0345800 // Os12g0244100 // Os07g0492000 // Os10g0539600
4	GO:0032553	F	ribonucleotide binding	11	98	3292	24075	0.8	1	// Os05g0405000 // Os02g0115900 // Os07g0492000 // Os10g0539600 // Os11g0247300 // Os03g0177400 // Os08g0345800 // Os03g0726100 // Os02g0519900 // Os12g0244100 // Os03g0177900
4	GO:0032555	F	purine ribonucleotide binding	11	98	3292	24075	0.8	1	// Os05g0405000 // Os02g0115900 // Os07g0492000 // Os10g0539600 // Os11g0247300 // Os03g0177400 // Os08g0345800 // Os03g0726100 // Os02g0519900 // Os12g0244100 // Os03g0177900
4	GO:0032559	F	adenyl ribonucleotide binding	6	98	3087	24075	0.99	1	// Os05g0405000 // Os02g0115900 // Os08g0345800 // Os12g0244100 // Os07g0492000 // Os10g0539600
4	GO:0032561	F	guanyl ribonucleotide binding	5	98	207	24075	0.0017	0.022	// Os03g0177900 // Os03g0177400 // Os03g0726100 // Os02g0519900 // Os11g0247300
4	GO:0043167	F	ion binding	7	98	5700	24075	1	1	// Os05g0405000 // Os07g0492000 // Os06g0726400 // Os10g0539600 // Os03g0424800 // Os06g0612800 // Os11g0660500
4	GO:0043169	F	cation binding	7	98	5696	24075	1	1	// Os05g0405000 // Os07g0492000 // Os06g0726400 // Os10g0539600 // Os03g0424800 // Os06g0612800 // Os11g0660500
4	GO:0045735	F	nutrient reservoir activity	16	98	77	24075	4.4e-22	6.1e-20	// Os07g0206400 // Os03g0766100 // Os02g0268300 // Os02g0248800 // Os02g0249600 // Os06g0507200 // Os02g0268100 // Os02g0249000 // Os02g0453600 // Os07g0206500 // Os05g0499100 // Os01g0762500 // Os07g0219300 // Os12g0269200 // Os10g0400200 // Os02g0242600
4	GO:0046872	F	metal ion binding	6	98	5476	24075	1	1	// Os05g0405000 // Os07g0492000 // Os06g0612800 // Os10g0539600 // Os03g0424800 // Os11g0660500
4	GO:0005576	C	extracellular region	5	98	251	24075	0.0039	0.017	// Os07g0214300 // Os07g0213800 // Os07g0214600 // Os07g0214100 // Os07g0215500
4	GO:0005615	C	extracellular space	5	98	8	24075	1.2e-09	7.6e-09	// Os07g0214300 // Os07g0213800 // Os07g0214600 // Os07g0214100 // Os07g0215500
4	GO:0005622	C	intracellular	84	98	4116	24075	1.7e-49	2.5e-48	// Os07g0206400 // Os05g0405000 // Os08g0116500 // Os02g0248800 // Os02g0177500 // Os05g0432200 // Os06g0681400 // Os06g0507200 // Os11g0433900 // Os01g0760600 // Os02g0509500 // Os01g0566900 // Os11g0199200 // Os02g0268100 // Os03g0177400 // Os08g0345800 // Os07g0214300 // Os12g0145100 // Os03g0601500 // Os03g0345200 // Os01g0896700 // Os02g0601300 // Os05g0459900 // Os10g0400200 // Os02g0242600…
4	GO:0005623	C	cell	88	98	5945	24075	4.8e-42	5.1e-41	// Os07g0206400 // Os05g0405000 // Os02g0248800 // Os02g0177500 // Os02g0509500 // Os11g0199200 // Os02g0268100 // Os03g0177400 // Os02g0601300 // Os02g0242600 // Os03g0234200 // Os12g0150100 // Os01g0663400 // Os08g0530200 // Os01g0191100 // Os02g0175600 // Os10g0411700 // Os07g0215500 // Os07g0219400 // Os07g0213800 // Os03g0271200 // Os08g0116500 // Os06g0681400 // Os06g0507200 // Os03g0345200…
4	GO:0005737	C	cytoplasm	80	98	1263	24075	3.1e-83	1.3e-81	// Os07g0206400 // Os05g0405000 // Os08g0116500 // Os02g0248800 // Os02g0177500 // Os05g0432200 // Os06g0507200 // Os11g0433900 // Os01g0760600 // Os02g0509500 // Os02g0268300 // Os11g0199200 // Os02g0268100 // Os03g0177400 // Os08g0345800 // Os07g0214300 // Os12g0145100 // Os03g0601500 // Os03g0345200 // Os01g0896700 // Os02g0601300 // Os05g0459900 // Os10g0400200 // Os02g0242600 // Os01g0356800…
4	GO:0005739	C	mitochondrion	8	98	162	24075	4.7e-07	2.1e-06	// Os06g0708500 // Os12g0150100 // Os05g0400400 // Os05g0557000 // Os05g0111200 // Os02g0202400 // Os07g0139600 // Os10g0466700
4	GO:0005840	C	ribosome	20	98	397	24075	3.5e-16	2.7e-15	// Os02g0175600 // Os08g0116500 // Os03g0408300 // Os10g0411700 // Os03g0234200 // Os02g0321900 // Os03g0818400 // Os02g0503400 // Os12g0150100 // Os03g0424800 // Os07g0139600 // Os05g0355500 // Os01g0834600 // Os08g0530200 // Os01g0191100 // Os03g0345200 // Os01g0896700 // Os05g0160200 // Os05g0459900 // Os10g0466700
4	GO:0009536	C	plastid	7	98	37	24075	4.9e-10	3.2e-09	// Os05g0405000 // Os08g0345800 // Os06g0726400 // Os12g0244100 // Os11g0433900 // Os03g0271200 // Os02g0601300
4	GO:0016020	C	membrane	9	98	2115	24075	0.5	1	// Os06g0141400 // Os10g0464300 // Os06g0653900 // Os10g0539600 // Os02g0268100 // Os05g0111200 // Os02g0202400 // Os03g0271200 // Os02g0178400
4	GO:0030529	C	ribonucleoprotein complex	20	98	438	24075	2.1e-15	1.5e-14	// Os02g0175600 // Os08g0116500 // Os03g0408300 // Os10g0411700 // Os03g0234200 // Os02g0321900 // Os03g0818400 // Os02g0503400 // Os12g0150100 // Os03g0424800 // Os07g0139600 // Os05g0355500 // Os01g0834600 // Os08g0530200 // Os01g0191100 // Os03g0345200 // Os01g0896700 // Os05g0160200 // Os05g0459900 // Os10g0466700
4	GO:0032991	C	macromolecular complex	22	98	1207	24075	3.1e-09	1.8e-08	// Os08g0116500 // Os03g0424800 // Os03g0345200 // Os01g0896700 // Os07g0139600 // Os03g0234200 // Os12g0150100 // Os05g0459900 // Os01g0834600 // Os08g0530200 // Os01g0191100 // Os05g0355500 // Os10g0466700 // Os03g0408300 // Os03g0818400 // Os11g0247300 // Os03g0726100 // Os02g0175600 // Os10g0411700 // Os02g0503400 // Os02g0321900 // Os05g0160200
4	GO:0043226	C	organelle	79	98	2859	24075	1.6e-54	3.4e-53	// Os07g0206400 // Os05g0405000 // Os08g0116500 // Os02g0248800 // Os02g0177500 // Os05g0432200 // Os06g0681400 // Os06g0507200 // Os11g0433900 // Os02g0509500 // Os02g0268300 // Os11g0199200 // Os02g0268100 // Os08g0345800 // Os07g0214300 // Os12g0145100 // Os03g0345200 // Os01g0896700 // Os02g0601300 // Os05g0459900 // Os10g0400200 // Os02g0242600 // Os01g0356800 // Os05g0328800 // Os12g0269200…
4	GO:0043227	C	membrane-bounded organelle	60	98	2319	24075	9.7e-36	8.3e-35	// Os07g0206400 // Os05g0405000 // Os02g0268300 // Os02g0248800 // Os02g0177500 // Os05g0432200 // Os06g0681400 // Os06g0507200 // Os11g0433900 // Os02g0509500 // Os11g0199200 // Os02g0268100 // Os07g0214300 // Os12g0145100 // Os02g0601300 // Os07g0139600 // Os10g0400200 // Os02g0242600 // Os01g0356800 // Os05g0328800 // Os12g0269200 // Os02g0249600 // Os06g0726400 // Os02g0202400 // Os03g0130300…
4	GO:0043228	C	non-membrane-bounded organelle	22	98	1494	24075	1.3e-07	6.3e-07	// Os08g0116500 // Os03g0424800 // Os03g0345200 // Os01g0896700 // Os07g0139600 // Os03g0234200 // Os12g0150100 // Os05g0459900 // Os01g0834600 // Os08g0530200 // Os01g0191100 // Os05g0355500 // Os10g0466700 // Os03g0408300 // Os03g0818400 // Os11g0247300 // Os03g0726100 // Os02g0175600 // Os10g0411700 // Os02g0503400 // Os02g0321900 // Os05g0160200
4	GO:0043229	C	intracellular organelle	79	98	2859	24075	1.6e-54	3.4e-53	// Os07g0206400 // Os05g0405000 // Os08g0116500 // Os02g0248800 // Os02g0177500 // Os05g0432200 // Os06g0681400 // Os06g0507200 // Os11g0433900 // Os02g0509500 // Os02g0268300 // Os11g0199200 // Os02g0268100 // Os08g0345800 // Os07g0214300 // Os12g0145100 // Os03g0345200 // Os01g0896700 // Os02g0601300 // Os05g0459900 // Os10g0400200 // Os02g0242600 // Os01g0356800 // Os05g0328800 // Os12g0269200…
4	GO:0043231	C	intracellular membrane-bounded organelle	60	98	2296	24075	5.6e-36	5.3e-35	// Os07g0206400 // Os05g0405000 // Os02g0268300 // Os02g0248800 // Os02g0177500 // Os05g0432200 // Os06g0681400 // Os06g0507200 // Os11g0433900 // Os02g0509500 // Os11g0199200 // Os02g0268100 // Os07g0214300 // Os12g0145100 // Os02g0601300 // Os07g0139600 // Os10g0400200 // Os02g0242600 // Os01g0356800 // Os05g0328800 // Os12g0269200 // Os02g0249600 // Os06g0726400 // Os02g0202400 // Os03g0130300…
4	GO:0043232	C	intracellular non-membrane-bounded organelle	22	98	1494	24075	1.3e-07	6.3e-07	// Os08g0116500 // Os03g0424800 // Os03g0345200 // Os01g0896700 // Os07g0139600 // Os03g0234200 // Os12g0150100 // Os05g0459900 // Os01g0834600 // Os08g0530200 // Os01g0191100 // Os05g0355500 // Os10g0466700 // Os03g0408300 // Os03g0818400 // Os11g0247300 // Os03g0726100 // Os02g0175600 // Os10g0411700 // Os02g0503400 // Os02g0321900 // Os05g0160200
4	GO:0044421	C	extracellular region part	5	98	12	24075	5.9e-09	3.2e-08	// Os07g0214300 // Os07g0213800 // Os07g0214600 // Os07g0214100 // Os07g0215500
4	GO:0044422	C	organelle part	10	98	1521	24075	0.092	0.36	// Os02g0115900 // Os03g0818400 // Os12g0150100 // Os05g0400400 // Os11g0247300 // Os05g0111200 // Os03g0726100 // Os08g0530200 // Os02g0202400 // Os02g0178400
4	GO:0044424	C	intracellular part	83	98	3529	24075	2.3e-53	4e-52	// Os07g0206400 // Os05g0405000 // Os08g0116500 // Os02g0248800 // Os02g0177500 // Os05g0432200 // Os06g0681400 // Os06g0507200 // Os11g0433900 // Os01g0760600 // Os02g0509500 // Os02g0268300 // Os11g0199200 // Os02g0268100 // Os03g0177400 // Os08g0345800 // Os07g0214300 // Os12g0145100 // Os03g0601500 // Os03g0345200 // Os01g0896700 // Os02g0601300 // Os05g0459900 // Os10g0400200 // Os02g0242600…
4	GO:0044444	C	cytoplasmic part	76	98	966	24075	2.1e-84	1.8e-82	// Os07g0206400 // Os05g0405000 // Os08g0116500 // Os02g0248800 // Os02g0177500 // Os05g0432200 // Os06g0507200 // Os11g0433900 // Os02g0509500 // Os02g0268300 // Os11g0199200 // Os02g0268100 // Os08g0345800 // Os07g0214300 // Os12g0145100 // Os03g0345200 // Os01g0896700 // Os02g0601300 // Os05g0459900 // Os10g0400200 // Os02g0242600 // Os01g0356800 // Os05g0328800 // Os12g0269200 // Os02g0249600…
4	GO:0044446	C	intracellular organelle part	10	98	1521	24075	0.092	0.36	// Os02g0115900 // Os03g0818400 // Os12g0150100 // Os05g0400400 // Os11g0247300 // Os05g0111200 // Os03g0726100 // Os08g0530200 // Os02g0202400 // Os02g0178400
4	GO:0044464	C	cell part	88	98	5945	24075	4.8e-42	5.1e-41	// Os07g0206400 // Os05g0405000 // Os02g0248800 // Os02g0177500 // Os02g0509500 // Os11g0199200 // Os02g0268100 // Os03g0177400 // Os02g0601300 // Os02g0242600 // Os03g0234200 // Os12g0150100 // Os01g0663400 // Os08g0530200 // Os01g0191100 // Os02g0175600 // Os10g0411700 // Os07g0215500 // Os07g0219400 // Os07g0213800 // Os03g0271200 // Os08g0116500 // Os06g0681400 // Os06g0507200 // Os03g0345200…
5	GO:0005975	P	carbohydrate metabolic process	5	102	833	24075	0.28	1	// Os04g0513100 // Os07g0662900 // Os03g0192700 // Os09g0511600 // Os09g0518700
5	GO:0006082	P	organic acid metabolic process	7	102	474	24075	0.0043	0.2	// Os08g0465800 // Os01g0919900 // Os05g0295300 // Os09g0539800 // Os06g0131300 // Os01g0681900 // Os01g0743500
5	GO:0006139	P	nucleobase, nucleoside, nucleotide and nucleic acid metabolic process	11	102	6695	24075	1	1	// Os02g0725900 // Os09g0522000 // Os06g0265400 // Os09g0489500 // Os08g0521600 // Os07g0191200 // Os07g0608200 // Os03g0689300 // Os01g0884300 // Os04g0493100 // Os03g0815100
5	GO:0006350	P	transcription	9	102	1629	24075	0.25	1	// Os02g0725900 // Os09g0522000 // Os06g0265400 // Os09g0489500 // Os08g0521600 // Os07g0608200 // Os01g0884300 // Os04g0493100 // Os03g0815100
5	GO:0006351	P	transcription, DNA-dependent	7	102	786	24075	0.051	0.78	// Os02g0725900 // Os09g0522000 // Os06g0265400 // Os09g0489500 // Os08g0521600 // Os07g0608200 // Os01g0884300
5	GO:0006355	P	regulation of transcription, DNA-dependent	7	102	737	24075	0.038	0.78	// Os02g0725900 // Os09g0522000 // Os06g0265400 // Os09g0489500 // Os08g0521600 // Os07g0608200 // Os01g0884300
5	GO:0006807	P	nitrogen compound metabolic process	14	102	7073	24075	1	1	// Os02g0725900 // Os09g0522000 // Os06g0265400 // Os09g0489500 // Os08g0465800 // Os08g0521600 // Os06g0131300 // Os07g0191200 // Os07g0608200 // Os03g0689300 // Os01g0884300 // Os01g0681900 // Os04g0493100 // Os03g0815100
5	GO:0006810	P	transport	12	102	1638	24075	0.045	0.78	// Os03g0305600 // Os04g0508300 // Os03g0142800 // Os12g0115100 // Os05g0156900 // Os01g0303300 // Os04g0652400 // Os07g0298900 // Os07g0191200 // Os03g0689300 // Os03g0111300 // Os03g0170900
5	GO:0006811	P	ion transport	5	102	408	24075	0.031	0.78	// Os03g0689300 // Os07g0191200 // Os04g0652400 // Os07g0298900 // Os05g0156900
5	GO:0006950	P	response to stress	5	102	873	24075	0.31	1	// Os09g0522000 // Os07g0671800 // Os11g0454300 // Os03g0750000 // Os02g0237000
5	GO:0008152	P	metabolic process	41	102	14398	24075	1	1	// Os08g0465800 // Os02g0540700 // Os10g0430900 // Os08g0521600 // Os03g0192700 // Os02g0237000 // Os10g0101200 // Os01g0681900 // Os09g0522000 // Os06g0265400 // Os09g0518700 // Os04g0513100 // Os04g0508300 // Os09g0511600 // Os05g0295300 // Os07g0191200 // Os09g0489500 // Os07g0638300 // Os09g0539800 // Os06g0131300 // Os02g0530600 // Os07g0608200 // Os03g0689300 // Os04g0390800 // Os04g0497000…
5	GO:0009058	P	biosynthetic process	16	102	6085	24075	0.99	1	// Os02g0725900 // Os09g0522000 // Os06g0265400 // Os05g0295300 // Os03g0192700 // Os09g0489500 // Os09g0539800 // Os08g0521600 // Os06g0131300 // Os07g0191200 // Os07g0608200 // Os03g0689300 // Os01g0884300 // Os01g0681900 // Os04g0493100 // Os03g0815100
5	GO:0009059	P	macromolecule biosynthetic process	9	102	5252	24075	1	1	// Os02g0725900 // Os09g0522000 // Os06g0265400 // Os09g0489500 // Os08g0521600 // Os07g0608200 // Os01g0884300 // Os04g0493100 // Os03g0815100
5	GO:0009889	P	regulation of biosynthetic process	9	102	1564	24075	0.22	1	// Os02g0725900 // Os09g0522000 // Os06g0265400 // Os09g0489500 // Os08g0521600 // Os07g0608200 // Os01g0884300 // Os04g0493100 // Os03g0815100
5	GO:0009987	P	cellular process	28	102	12839	24075	1	1	// Os08g0465800 // Os02g0540700 // Os10g0430900 // Os08g0521600 // Os03g0159600 // Os03g0192700 // Os01g0681900 // Os09g0522000 // Os06g0265400 // Os07g0191200 // Os04g0508300 // Os05g0295300 // Os09g0489500 // Os07g0638300 // Os09g0539800 // Os06g0131300 // Os07g0608200 // Os03g0689300 // Os09g0518700 // Os01g0743500 // Os02g0725900 // Os02g0530600 // Os01g0919900 // Os07g0188000 // Os02g0503700…
5	GO:0010467	P	gene expression	9	102	2424	24075	0.71	1	// Os02g0725900 // Os09g0522000 // Os06g0265400 // Os09g0489500 // Os08g0521600 // Os07g0608200 // Os01g0884300 // Os04g0493100 // Os03g0815100
5	GO:0010468	P	regulation of gene expression	9	102	1577	24075	0.23	1	// Os02g0725900 // Os09g0522000 // Os06g0265400 // Os09g0489500 // Os08g0521600 // Os07g0608200 // Os01g0884300 // Os04g0493100 // Os03g0815100
5	GO:0010556	P	regulation of macromolecule biosynthetic process	9	102	1564	24075	0.22	1	// Os02g0725900 // Os09g0522000 // Os06g0265400 // Os09g0489500 // Os08g0521600 // Os07g0608200 // Os01g0884300 // Os04g0493100 // Os03g0815100
5	GO:0016070	P	RNA metabolic process	7	102	1088	24075	0.18	1	// Os02g0725900 // Os09g0522000 // Os06g0265400 // Os09g0489500 // Os08g0521600 // Os07g0608200 // Os01g0884300
5	GO:0019219	P	regulation of nucleobase, nucleoside, nucleotide and nucleic acid metabolic process	9	102	1520	24075	0.2	1	// Os02g0725900 // Os09g0522000 // Os06g0265400 // Os09g0489500 // Os08g0521600 // Os07g0608200 // Os01g0884300 // Os04g0493100 // Os03g0815100
5	GO:0019222	P	regulation of metabolic process	9	102	1664	24075	0.27	1	// Os02g0725900 // Os09g0522000 // Os06g0265400 // Os09g0489500 // Os08g0521600 // Os07g0608200 // Os01g0884300 // Os04g0493100 // Os03g0815100
5	GO:0019538	P	protein metabolic process	7	102	4333	24075	1	1	// Os02g0530600 // Os07g0188000 // Os02g0540700 // Os10g0430900 // Os11g0432900 // Os02g0644000 // Os10g0101200
5	GO:0019752	P	carboxylic acid metabolic process	7	102	473	24075	0.0043	0.2	// Os08g0465800 // Os01g0919900 // Os05g0295300 // Os09g0539800 // Os06g0131300 // Os01g0681900 // Os01g0743500
5	GO:0031323	P	regulation of cellular metabolic process	9	102	1593	24075	0.23	1	// Os02g0725900 // Os09g0522000 // Os06g0265400 // Os09g0489500 // Os08g0521600 // Os07g0608200 // Os01g0884300 // Os04g0493100 // Os03g0815100
5	GO:0031326	P	regulation of cellular biosynthetic process	9	102	1564	24075	0.22	1	// Os02g0725900 // Os09g0522000 // Os06g0265400 // Os09g0489500 // Os08g0521600 // Os07g0608200 // Os01g0884300 // Os04g0493100 // Os03g0815100
5	GO:0032774	P	RNA biosynthetic process	7	102	788	24075	0.051	0.78	// Os02g0725900 // Os09g0522000 // Os06g0265400 // Os09g0489500 // Os08g0521600 // Os07g0608200 // Os01g0884300
5	GO:0034645	P	cellular macromolecule biosynthetic process	9	102	5248	24075	1	1	// Os02g0725900 // Os09g0522000 // Os06g0265400 // Os09g0489500 // Os08g0521600 // Os07g0608200 // Os01g0884300 // Os04g0493100 // Os03g0815100
5	GO:0042180	P	cellular ketone metabolic process	7	102	480	24075	0.0046	0.2	// Os08g0465800 // Os01g0919900 // Os05g0295300 // Os09g0539800 // Os06g0131300 // Os01g0681900 // Os01g0743500
5	GO:0043170	P	macromolecule metabolic process	16	102	10433	24075	1	1	// Os02g0725900 // Os09g0522000 // Os06g0265400 // Os02g0530600 // Os07g0188000 // Os09g0489500 // Os02g0540700 // Os10g0430900 // Os08g0521600 // Os11g0432900 // Os02g0644000 // Os07g0608200 // Os10g0101200 // Os01g0884300 // Os04g0493100 // Os03g0815100
5	GO:0043436	P	oxoacid metabolic process	7	102	473	24075	0.0043	0.2	// Os08g0465800 // Os01g0919900 // Os05g0295300 // Os09g0539800 // Os06g0131300 // Os01g0681900 // Os01g0743500
5	GO:0044237	P	cellular metabolic process	26	102	10696	24075	1	1	// Os08g0465800 // Os02g0540700 // Os10g0430900 // Os09g0518700 // Os03g0192700 // Os01g0681900 // Os09g0522000 // Os06g0265400 // Os07g0191200 // Os04g0508300 // Os05g0295300 // Os09g0489500 // Os09g0539800 // Os06g0131300 // Os07g0608200 // Os03g0689300 // Os08g0521600 // Os01g0743500 // Os02g0725900 // Os02g0530600 // Os01g0919900 // Os07g0188000 // Os02g0503700 // Os01g0884300 // Os04g0493100…
5	GO:0044238	P	primary metabolic process	29	102	11969	24075	1	1	// Os08g0465800 // Os02g0540700 // Os10g0430900 // Os08g0521600 // Os03g0192700 // Os10g0101200 // Os01g0681900 // Os09g0522000 // Os06g0265400 // Os07g0191200 // Os09g0511600 // Os04g0513100 // Os09g0489500 // Os09g0539800 // Os06g0131300 // Os02g0530600 // Os07g0608200 // Os03g0689300 // Os09g0518700 // Os02g0725900 // Os07g0662900 // Os01g0919900 // Os07g0188000 // Os11g0432900 // Os02g0644000…
5	GO:0044249	P	cellular biosynthetic process	16	102	5890	24075	0.99	1	// Os02g0725900 // Os09g0522000 // Os06g0265400 // Os05g0295300 // Os03g0192700 // Os09g0489500 // Os09g0539800 // Os08g0521600 // Os06g0131300 // Os07g0191200 // Os07g0608200 // Os03g0689300 // Os01g0884300 // Os01g0681900 // Os04g0493100 // Os03g0815100
5	GO:0044260	P	cellular macromolecule metabolic process	13	102	9350	24075	1	1	// Os02g0725900 // Os09g0522000 // Os06g0265400 // Os02g0530600 // Os07g0188000 // Os09g0489500 // Os02g0540700 // Os10g0430900 // Os08g0521600 // Os07g0608200 // Os01g0884300 // Os04g0493100 // Os03g0815100
5	GO:0044281	P	small molecule metabolic process	12	102	1034	24075	0.0015	0.2	// Os08g0465800 // Os03g0192700 // Os01g0919900 // Os05g0295300 // Os07g0188000 // Os09g0539800 // Os09g0518700 // Os06g0131300 // Os07g0191200 // Os03g0689300 // Os01g0681900 // Os01g0743500
5	GO:0044283	P	small molecule biosynthetic process	5	102	320	24075	0.012	0.44	// Os06g0131300 // Os01g0681900 // Os03g0192700 // Os09g0539800 // Os05g0295300
5	GO:0045449	P	regulation of transcription	9	102	1513	24075	0.19	1	// Os02g0725900 // Os09g0522000 // Os06g0265400 // Os09g0489500 // Os08g0521600 // Os07g0608200 // Os01g0884300 // Os04g0493100 // Os03g0815100
5	GO:0050789	P	regulation of biological process	11	102	2027	24075	0.24	1	// Os02g0725900 // Os09g0522000 // Os06g0265400 // Os04g0508300 // Os09g0489500 // Os07g0638300 // Os08g0521600 // Os07g0608200 // Os01g0884300 // Os04g0493100 // Os03g0815100
5	GO:0050794	P	regulation of cellular process	11	102	1955	24075	0.21	1	// Os02g0725900 // Os09g0522000 // Os06g0265400 // Os04g0508300 // Os09g0489500 // Os07g0638300 // Os08g0521600 // Os07g0608200 // Os01g0884300 // Os04g0493100 // Os03g0815100
5	GO:0050896	P	response to stimulus	6	102	1026	24075	0.27	1	// Os09g0522000 // Os07g0671800 // Os03g0750000 // Os11g0454300 // Os03g0159600 // Os02g0237000
5	GO:0051171	P	regulation of nitrogen compound metabolic process	9	102	1520	24075	0.2	1	// Os02g0725900 // Os09g0522000 // Os06g0265400 // Os09g0489500 // Os08g0521600 // Os07g0608200 // Os01g0884300 // Os04g0493100 // Os03g0815100
5	GO:0051179	P	localization	12	102	1651	24075	0.047	0.78	// Os03g0305600 // Os04g0508300 // Os03g0142800 // Os12g0115100 // Os05g0156900 // Os01g0303300 // Os04g0652400 // Os07g0298900 // Os07g0191200 // Os03g0689300 // Os03g0111300 // Os03g0170900
5	GO:0051234	P	establishment of localization	12	102	1638	24075	0.045	0.78	// Os03g0305600 // Os04g0508300 // Os03g0142800 // Os12g0115100 // Os05g0156900 // Os01g0303300 // Os04g0652400 // Os07g0298900 // Os07g0191200 // Os03g0689300 // Os03g0111300 // Os03g0170900
5	GO:0051252	P	regulation of RNA metabolic process	7	102	740	24075	0.039	0.78	// Os02g0725900 // Os09g0522000 // Os06g0265400 // Os09g0489500 // Os08g0521600 // Os07g0608200 // Os01g0884300
5	GO:0055114	P	oxidation reduction	9	102	1351	24075	0.12	1	// Os07g0638300 // Os04g0508300 // Os04g0497000 // Os03g0189600 // Os05g0542500 // Os02g0237000 // Os01g0681900 // Os02g0503700 // Os01g0743500
5	GO:0060255	P	regulation of macromolecule metabolic process	9	102	1640	24075	0.26	1	// Os02g0725900 // Os09g0522000 // Os06g0265400 // Os09g0489500 // Os08g0521600 // Os07g0608200 // Os01g0884300 // Os04g0493100 // Os03g0815100
5	GO:0065007	P	biological regulation	12	102	2125	24075	0.19	1	// Os02g0725900 // Os09g0522000 // Os06g0265400 // Os04g0508300 // Os09g0489500 // Os07g0638300 // Os08g0521600 // Os03g0159600 // Os07g0608200 // Os01g0884300 // Os04g0493100 // Os03g0815100
5	GO:0080090	P	regulation of primary metabolic process	9	102	1626	24075	0.25	1	// Os02g0725900 // Os09g0522000 // Os06g0265400 // Os09g0489500 // Os08g0521600 // Os07g0608200 // Os01g0884300 // Os04g0493100 // Os03g0815100
5	GO:0000166	F	nucleotide binding	9	102	3874	24075	0.99	1	// Os03g0142800 // Os05g0295300 // Os10g0430900 // Os09g0518700 // Os07g0191200 // Os08g0544400 // Os03g0689300 // Os01g0681900 // Os01g0743500
5	GO:0001882	F	nucleoside binding	8	102	3257	24075	0.97	1	// Os05g0295300 // Os07g0191200 // Os10g0430900 // Os09g0518700 // Os03g0142800 // Os08g0544400 // Os03g0689300 // Os01g0681900
5	GO:0001883	F	purine nucleoside binding	8	102	3247	24075	0.97	1	// Os05g0295300 // Os07g0191200 // Os10g0430900 // Os09g0518700 // Os03g0142800 // Os08g0544400 // Os03g0689300 // Os01g0681900
5	GO:0003676	F	nucleic acid binding	10	102	8251	24075	1	1	// Os02g0725900 // Os09g0522000 // Os06g0265400 // Os07g0188000 // Os09g0489500 // Os08g0521600 // Os07g0608200 // Os07g0668600 // Os01g0884300 // Os03g0815100
5	GO:0003677	F	DNA binding	8	102	5059	24075	1	1	// Os02g0725900 // Os09g0522000 // Os06g0265400 // Os09g0489500 // Os08g0521600 // Os07g0608200 // Os01g0884300 // Os03g0815100
5	GO:0003700	F	transcription factor activity	5	102	651	24075	0.14	1	// Os07g0608200 // Os09g0522000 // Os06g0265400 // Os09g0489500 // Os08g0521600
5	GO:0003824	F	catalytic activity	40	102	12724	24075	1	1	// Os08g0465800 // Os03g0689100 // Os03g0142800 // Os02g0540700 // Os10g0430900 // Os09g0518700 // Os03g0192700 // Os08g0544400 // Os02g0237000 // Os10g0101200 // Os01g0681900 // Os07g0638300 // Os08g0258200 // Os08g0359200 // Os05g0295300 // Os02g0503900 // Os02g0530600 // Os08g0498400 // Os04g0508300 // Os09g0511600 // Os04g0513100 // Os07g0191200 // Os05g0156900 // Os06g0131300 // Os07g0662900…
5	GO:0005215	F	transporter activity	9	102	941	24075	0.019	0.62	// Os03g0305600 // Os03g0142800 // Os09g0539800 // Os05g0156900 // Os01g0303300 // Os04g0652400 // Os07g0191200 // Os03g0689300 // Os03g0170900
5	GO:0005488	F	binding	47	102	16823	24075	1	1	// Os08g0465800 // Os03g0689100 // Os03g0142800 // Os02g0540700 // Os12g0115100 // Os08g0521600 // Os07g0298900 // Os03g0192700 // Os08g0544400 // Os02g0237000 // Os01g0719100 // Os01g0681900 // Os09g0522000 // Os06g0265400 // Os09g0518700 // Os01g0816400 // Os08g0258200 // Os05g0295300 // Os02g0503900 // Os04g0497000 // Os09g0511600 // Os04g0513100 // Os07g0191200 // Os09g0489500 // Os09g0539800…
5	GO:0005515	F	protein binding	6	102	2460	24075	0.96	1	// Os06g0265400 // Os07g0497100 // Os09g0489500 // Os08g0258200 // Os01g0350900 // Os01g0719100
5	GO:0005524	F	ATP binding	7	102	3085	24075	0.98	1	// Os05g0295300 // Os07g0191200 // Os10g0430900 // Os09g0518700 // Os03g0142800 // Os08g0544400 // Os03g0689300
5	GO:0008270	F	zinc ion binding	8	102	3939	24075	1	1	// Os07g0497100 // Os04g0497000 // Os08g0258200 // Os03g0189600 // Os01g0350900 // Os09g0464000 // Os07g0668600 // Os01g0719100
5	GO:0009055	F	electron carrier activity	5	102	599	24075	0.11	1	// Os02g0237000 // Os02g0503900 // Os04g0508300 // Os02g0503700 // Os01g0681900
5	GO:0016462	F	pyrophosphatase activity	5	102	743	24075	0.21	1	// Os08g0544400 // Os03g0142800 // Os03g0689300 // Os07g0191200 // Os05g0156900
5	GO:0016491	F	oxidoreductase activity	15	102	1672	24075	0.0047	0.61	// Os07g0638300 // Os04g0508300 // Os01g0919900 // Os03g0689100 // Os04g0497000 // Os02g0503900 // Os03g0189600 // Os03g0842900 // Os05g0140800 // Os05g0542500 // Os02g0237000 // Os01g0681900 // Os04g0390800 // Os02g0503700 // Os01g0743500
5	GO:0016740	F	transferase activity	8	102	6190	24075	1	1	// Os08g0498400 // Os02g0530600 // Os08g0258200 // Os09g0518700 // Os07g0662900 // Os10g0430900 // Os06g0326700 // Os10g0101200
5	GO:0016787	F	hydrolase activity	11	102	4901	24075	1	1	// Os03g0142800 // Os09g0511600 // Os03g0689100 // Os04g0513100 // Os05g0156900 // Os11g0432900 // Os02g0644000 // Os07g0191200 // Os08g0544400 // Os03g0689300 // Os10g0101200
5	GO:0016817	F	hydrolase activity, acting on acid anhydrides	5	102	764	24075	0.22	1	// Os08g0544400 // Os03g0142800 // Os03g0689300 // Os07g0191200 // Os05g0156900
5	GO:0016818	F	hydrolase activity, acting on acid anhydrides, in phosphorus-containing anhydrides	5	102	759	24075	0.22	1	// Os08g0544400 // Os03g0142800 // Os03g0689300 // Os07g0191200 // Os05g0156900
5	GO:0017076	F	purine nucleotide binding	8	102	3456	24075	0.98	1	// Os05g0295300 // Os07g0191200 // Os10g0430900 // Os09g0518700 // Os03g0142800 // Os08g0544400 // Os03g0689300 // Os01g0681900
5	GO:0022804	F	active transmembrane transporter activity	5	102	333	24075	0.014	0.62	// Os03g0142800 // Os03g0689300 // Os07g0191200 // Os04g0652400 // Os05g0156900
5	GO:0022857	F	transmembrane transporter activity	6	102	643	24075	0.057	1	// Os03g0170900 // Os03g0142800 // Os05g0156900 // Os07g0191200 // Os03g0689300 // Os04g0652400
5	GO:0022892	F	substrate-specific transporter activity	7	102	593	24075	0.014	0.62	// Os03g0305600 // Os03g0170900 // Os09g0539800 // Os01g0303300 // Os07g0191200 // Os03g0689300 // Os04g0652400
5	GO:0030528	F	transcription regulator activity	6	102	987	24075	0.24	1	// Os09g0522000 // Os06g0265400 // Os09g0489500 // Os08g0521600 // Os07g0608200 // Os04g0493100
5	GO:0030554	F	adenyl nucleotide binding	8	102	3247	24075	0.97	1	// Os05g0295300 // Os07g0191200 // Os10g0430900 // Os09g0518700 // Os03g0142800 // Os08g0544400 // Os03g0689300 // Os01g0681900
5	GO:0032553	F	ribonucleotide binding	7	102	3292	24075	0.99	1	// Os05g0295300 // Os07g0191200 // Os10g0430900 // Os09g0518700 // Os03g0142800 // Os08g0544400 // Os03g0689300
5	GO:0032555	F	purine ribonucleotide binding	7	102	3292	24075	0.99	1	// Os05g0295300 // Os07g0191200 // Os10g0430900 // Os09g0518700 // Os03g0142800 // Os08g0544400 // Os03g0689300
5	GO:0032559	F	adenyl ribonucleotide binding	7	102	3087	24075	0.98	1	// Os05g0295300 // Os07g0191200 // Os10g0430900 // Os09g0518700 // Os03g0142800 // Os08g0544400 // Os03g0689300
5	GO:0043167	F	ion binding	21	102	5700	24075	0.8	1	// Os02g0503900 // Os07g0662900 // Os09g0511600 // Os01g0919900 // Os03g0689100 // Os04g0513100 // Os04g0497000 // Os08g0258200 // Os09g0518700 // Os06g0131300 // Os03g0189600 // Os01g0350900 // Os09g0464000 // Os02g0503700 // Os07g0298900 // Os07g0497100 // Os02g0237000 // Os07g0668600 // Os01g0719100 // Os01g0681900 // Os01g0743500
5	GO:0043169	F	cation binding	21	102	5696	24075	0.8	1	// Os02g0503900 // Os07g0662900 // Os09g0511600 // Os01g0919900 // Os03g0689100 // Os04g0513100 // Os04g0497000 // Os08g0258200 // Os09g0518700 // Os06g0131300 // Os03g0189600 // Os01g0350900 // Os09g0464000 // Os02g0503700 // Os07g0298900 // Os07g0497100 // Os02g0237000 // Os07g0668600 // Os01g0719100 // Os01g0681900 // Os01g0743500
5	GO:0046872	F	metal ion binding	18	102	5476	24075	0.91	1	// Os02g0503900 // Os01g0919900 // Os03g0689100 // Os02g0503700 // Os04g0497000 // Os08g0258200 // Os09g0518700 // Os06g0131300 // Os03g0189600 // Os01g0350900 // Os09g0464000 // Os07g0298900 // Os07g0497100 // Os02g0237000 // Os07g0668600 // Os01g0719100 // Os01g0681900 // Os01g0743500
5	GO:0046914	F	transition metal ion binding	14	102	4875	24075	0.97	1	// Os02g0503900 // Os01g0919900 // Os03g0689100 // Os02g0503700 // Os04g0497000 // Os08g0258200 // Os03g0189600 // Os01g0350900 // Os09g0464000 // Os07g0497100 // Os02g0237000 // Os07g0668600 // Os01g0719100 // Os01g0681900
5	GO:0005622	C	intracellular	71	102	4116	24075	2.4e-31	1.6e-30	// Os05g0171900 // Os04g0510900 // Os05g0295300 // Os03g0369100 // Os02g0540700 // Os12g0115100 // Os08g0521600 // Os06g0524400 // Os05g0172800 // Os03g0159600 // Os12g0479400 // Os03g0192700 // Os03g0227800 // Os02g0237000 // Os01g0719100 // Os04g0650900 // Os09g0511600 // Os09g0522000 // Os06g0265400 // Os04g0390800 // Os09g0518700 // Os09g0505300 // Os07g0624600 // Os04g0546500 // Os03g0277500…
5	GO:0005623	C	cell	79	102	5945	24075	9.7e-29	5.5e-28	// Os05g0171900 // Os04g0510900 // Os05g0295300 // Os04g0652400 // Os03g0369100 // Os02g0540700 // Os12g0115100 // Os08g0521600 // Os06g0524400 // Os05g0172800 // Os03g0159600 // Os12g0479400 // Os03g0192700 // Os08g0544400 // Os02g0237000 // Os01g0719100 // Os04g0650900 // Os09g0511600 // Os09g0522000 // Os06g0265400 // Os04g0390800 // Os09g0518700 // Os09g0505300 // Os07g0624600 // Os04g0546500…
5	GO:0005634	C	nucleus	11	102	1884	24075	0.17	0.72	// Os02g0725900 // Os09g0522000 // Os06g0265400 // Os02g0530600 // Os07g0188000 // Os09g0489500 // Os08g0521600 // Os03g0159600 // Os07g0608200 // Os01g0884300 // Os04g0493100
5	GO:0005737	C	cytoplasm	63	102	1263	24075	2.7e-53	1.2e-51	// Os05g0171900 // Os04g0510900 // Os03g0369100 // Os02g0540700 // Os12g0115100 // Os09g0518700 // Os06g0524400 // Os05g0172800 // Os12g0479400 // Os03g0192700 // Os03g0227800 // Os02g0237000 // Os01g0719100 // Os04g0650900 // Os09g0511600 // Os09g0522000 // Os07g0638300 // Os09g0505300 // Os07g0624600 // Os04g0546500 // Os03g0277500 // Os08g0258200 // Os01g0944200 // Os08g0221300 // Os09g0453100…
5	GO:0005739	C	mitochondrion	16	102	162	24075	4.1e-17	2.2e-16	// Os03g0305600 // Os08g0498400 // Os09g0518700 // Os01g0919900 // Os09g0505300 // Os07g0188000 // Os01g0944200 // Os02g0540700 // Os08g0258200 // Os03g0336100 // Os01g0303300 // Os04g0244800 // Os10g0501500 // Os03g0227800 // Os01g0717000 // Os01g0719100
5	GO:0009536	C	plastid	19	102	37	24075	4.8e-32	3.4e-31	// Os05g0171900 // Os09g0522000 // Os07g0638300 // Os04g0504700 // Os05g0447700 // Os05g0295300 // Os07g0624600 // Os02g0503900 // Os10g0430900 // Os02g0522700 // Os02g0474000 // Os08g0221300 // Os09g0539800 // Os05g0140800 // Os09g0453100 // Os05g0172800 // Os09g0464000 // Os05g0569500 // Os01g0743500
5	GO:0016020	C	membrane	13	102	2115	24075	0.11	0.51	// Os03g0305600 // Os03g0142800 // Os04g0546500 // Os05g0156900 // Os01g0303300 // Os08g0359200 // Os03g0699000 // Os04g0652400 // Os07g0191200 // Os08g0544400 // Os07g0134000 // Os03g0689300 // Os03g0170900
5	GO:0016021	C	integral to membrane	7	102	752	24075	0.042	0.21	// Os07g0191200 // Os03g0142800 // Os04g0546500 // Os03g0699000 // Os03g0170900 // Os03g0689300 // Os04g0652400
5	GO:0016023	C	cytoplasmic membrane-bounded vesicle	23	102	26	24075	8.9e-43	1.3e-41	// Os04g0510900 // Os03g0369100 // Os03g0793700 // Os06g0524400 // Os02g0237000 // Os04g0650900 // Os09g0511600 // Os03g0277500 // Os12g0479400 // Os03g0663800 // Os01g0136100 // Os04g0513100 // Os05g0156900 // Os06g0553200 // Os12g0115100 // Os07g0608200 // Os04g0390800 // Os10g0556100 // Os11g0432900 // Os02g0644000 // Os11g0582400 // Os03g0111300 // Os03g0842900
5	GO:0031224	C	intrinsic to membrane	7	102	775	24075	0.048	0.23	// Os07g0191200 // Os03g0142800 // Os04g0546500 // Os03g0699000 // Os03g0170900 // Os03g0689300 // Os04g0652400
5	GO:0031410	C	cytoplasmic vesicle	23	102	34	24075	7.9e-41	8.5e-40	// Os04g0510900 // Os03g0369100 // Os03g0793700 // Os06g0524400 // Os02g0237000 // Os04g0650900 // Os09g0511600 // Os03g0277500 // Os12g0479400 // Os03g0663800 // Os01g0136100 // Os04g0513100 // Os05g0156900 // Os06g0553200 // Os12g0115100 // Os07g0608200 // Os04g0390800 // Os10g0556100 // Os11g0432900 // Os02g0644000 // Os11g0582400 // Os03g0111300 // Os03g0842900
5	GO:0031982	C	vesicle	23	102	34	24075	7.9e-41	8.5e-40	// Os04g0510900 // Os03g0369100 // Os03g0793700 // Os06g0524400 // Os02g0237000 // Os04g0650900 // Os09g0511600 // Os03g0277500 // Os12g0479400 // Os03g0663800 // Os01g0136100 // Os04g0513100 // Os05g0156900 // Os06g0553200 // Os12g0115100 // Os07g0608200 // Os04g0390800 // Os10g0556100 // Os11g0432900 // Os02g0644000 // Os11g0582400 // Os03g0111300 // Os03g0842900
5	GO:0031988	C	membrane-bounded vesicle	23	102	26	24075	8.9e-43	1.3e-41	// Os04g0510900 // Os03g0369100 // Os03g0793700 // Os06g0524400 // Os02g0237000 // Os04g0650900 // Os09g0511600 // Os03g0277500 // Os12g0479400 // Os03g0663800 // Os01g0136100 // Os04g0513100 // Os05g0156900 // Os06g0553200 // Os12g0115100 // Os07g0608200 // Os04g0390800 // Os10g0556100 // Os11g0432900 // Os02g0644000 // Os11g0582400 // Os03g0111300 // Os03g0842900
5	GO:0043226	C	organelle	68	102	2859	24075	4.3e-38	3.7e-37	// Os05g0171900 // Os04g0510900 // Os05g0295300 // Os03g0369100 // Os02g0540700 // Os12g0115100 // Os08g0521600 // Os06g0524400 // Os05g0172800 // Os03g0159600 // Os12g0479400 // Os03g0227800 // Os02g0237000 // Os01g0719100 // Os04g0650900 // Os09g0511600 // Os09g0522000 // Os06g0265400 // Os04g0390800 // Os09g0518700 // Os09g0505300 // Os07g0624600 // Os04g0546500 // Os03g0277500 // Os08g0258200…
5	GO:0043227	C	membrane-bounded organelle	68	102	2319	24075	7.8e-44	1.7e-42	// Os05g0171900 // Os04g0510900 // Os05g0295300 // Os03g0369100 // Os02g0540700 // Os12g0115100 // Os08g0521600 // Os06g0524400 // Os05g0172800 // Os03g0159600 // Os12g0479400 // Os03g0227800 // Os02g0237000 // Os01g0719100 // Os04g0650900 // Os09g0511600 // Os09g0522000 // Os06g0265400 // Os04g0390800 // Os09g0518700 // Os09g0505300 // Os07g0624600 // Os04g0546500 // Os03g0277500 // Os08g0258200…
5	GO:0043229	C	intracellular organelle	68	102	2859	24075	4.3e-38	3.7e-37	// Os05g0171900 // Os04g0510900 // Os05g0295300 // Os03g0369100 // Os02g0540700 // Os12g0115100 // Os08g0521600 // Os06g0524400 // Os05g0172800 // Os03g0159600 // Os12g0479400 // Os03g0227800 // Os02g0237000 // Os01g0719100 // Os04g0650900 // Os09g0511600 // Os09g0522000 // Os06g0265400 // Os04g0390800 // Os09g0518700 // Os09g0505300 // Os07g0624600 // Os04g0546500 // Os03g0277500 // Os08g0258200…
5	GO:0043231	C	intracellular membrane-bounded organelle	68	102	2296	24075	4.1e-44	1.2e-42	// Os05g0171900 // Os04g0510900 // Os05g0295300 // Os03g0369100 // Os02g0540700 // Os12g0115100 // Os08g0521600 // Os06g0524400 // Os05g0172800 // Os03g0159600 // Os12g0479400 // Os03g0227800 // Os02g0237000 // Os01g0719100 // Os04g0650900 // Os09g0511600 // Os09g0522000 // Os06g0265400 // Os04g0390800 // Os09g0518700 // Os09g0505300 // Os07g0624600 // Os04g0546500 // Os03g0277500 // Os08g0258200…
5	GO:0044422	C	organelle part	7	102	1521	24075	0.47	1	// Os03g0305600 // Os04g0546500 // Os07g0188000 // Os01g0303300 // Os03g0159600 // Os03g0699000 // Os07g0608200
5	GO:0044424	C	intracellular part	71	102	3529	24075	1.1e-35	8.9e-35	// Os05g0171900 // Os04g0510900 // Os05g0295300 // Os03g0369100 // Os02g0540700 // Os12g0115100 // Os08g0521600 // Os06g0524400 // Os05g0172800 // Os03g0159600 // Os12g0479400 // Os03g0192700 // Os03g0227800 // Os02g0237000 // Os01g0719100 // Os04g0650900 // Os09g0511600 // Os09g0522000 // Os06g0265400 // Os04g0390800 // Os09g0518700 // Os09g0505300 // Os07g0624600 // Os04g0546500 // Os03g0277500…
5	GO:0044425	C	membrane part	7	102	1007	24075	0.14	0.59	// Os07g0191200 // Os03g0142800 // Os04g0546500 // Os03g0699000 // Os03g0170900 // Os03g0689300 // Os04g0652400
5	GO:0044444	C	cytoplasmic part	60	102	966	24075	1.3e-55	1.1e-53	// Os05g0171900 // Os04g0510900 // Os03g0369100 // Os02g0540700 // Os12g0115100 // Os09g0518700 // Os06g0524400 // Os05g0172800 // Os12g0479400 // Os03g0227800 // Os02g0237000 // Os01g0719100 // Os04g0650900 // Os09g0511600 // Os09g0522000 // Os07g0638300 // Os09g0505300 // Os07g0624600 // Os04g0546500 // Os03g0277500 // Os08g0258200 // Os01g0944200 // Os08g0221300 // Os09g0453100 // Os02g0503900…
5	GO:0044446	C	intracellular organelle part	7	102	1521	24075	0.47	1	// Os03g0305600 // Os04g0546500 // Os07g0188000 // Os01g0303300 // Os03g0159600 // Os03g0699000 // Os07g0608200
5	GO:0044464	C	cell part	79	102	5945	24075	9.7e-29	5.5e-28	// Os05g0171900 // Os04g0510900 // Os05g0295300 // Os04g0652400 // Os03g0369100 // Os02g0540700 // Os12g0115100 // Os08g0521600 // Os06g0524400 // Os05g0172800 // Os03g0159600 // Os12g0479400 // Os03g0192700 // Os08g0544400 // Os02g0237000 // Os01g0719100 // Os04g0650900 // Os09g0511600 // Os09g0522000 // Os06g0265400 // Os04g0390800 // Os09g0518700 // Os09g0505300 // Os07g0624600 // Os04g0546500…
6	GO:0005975	P	carbohydrate metabolic process	6	131	833	24075	0.3	1	// Os01g0877400 // Os06g0675700 // Os04g0658000 // Os06g0679500 // Os01g0633100 // Os10g0465700
6	GO:0006082	P	organic acid metabolic process	7	131	474	24075	0.016	0.58	// Os04g0543900 // Os01g0757200 // Os03g0223400 // Os03g0685300 // Os07g0437500 // Os07g0169600 // Os03g0712800
6	GO:0006139	P	nucleobase, nucleoside, nucleotide and nucleic acid metabolic process	15	131	6695	24075	1	1	// Os01g0812000 // Os01g0191300 // Os01g0261200 // Os02g0176700 // Os01g0855400 // Os04g0429300 // Os06g0193400 // Os09g0369000 // Os06g0700700 // Os07g0406800 // Os07g0139500 // Os08g0458600 // Os03g0689300 // Os01g0104500 // Os05g0228400
6	GO:0006350	P	transcription	11	131	1629	24075	0.27	1	// Os01g0812000 // Os01g0191300 // Os01g0261200 // Os08g0458600 // Os01g0855400 // Os04g0429300 // Os06g0193400 // Os09g0369000 // Os07g0139500 // Os01g0104500 // Os05g0228400
6	GO:0006464	P	protein modification process	6	131	1929	24075	0.96	1	// Os01g0877400 // Os03g0761100 // Os03g0825300 // Os01g0709500 // Os06g0679500 // Os04g0432000
6	GO:0006508	P	proteolysis	11	131	1579	24075	0.24	1	// Os05g0567100 // Os08g0556900 // Os03g0367900 // Os11g0156200 // Os02g0664300 // Os02g0709400 // Os05g0268500 // Os11g0255300 // Os01g0663400 // Os04g0537900 // Os09g0479900
6	GO:0006519	P	cellular amino acid and derivative metabolic process	5	131	391	24075	0.064	1	// Os07g0437500 // Os04g0543900 // Os03g0223400 // Os03g0712800 // Os03g0685300
6	GO:0006520	P	cellular amino acid metabolic process	5	131	303	24075	0.026	0.6	// Os07g0437500 // Os04g0543900 // Os03g0223400 // Os03g0712800 // Os03g0685300
6	GO:0006629	P	lipid metabolic process	6	131	528	24075	0.07	1	// Os01g0757200 // Os01g0663400 // Os07g0169600 // Os12g0267200 // Os01g0898500 // Os05g0567100
6	GO:0006807	P	nitrogen compound metabolic process	21	131	7073	24075	1	1	// Os01g0812000 // Os04g0543900 // Os03g0685300 // Os01g0261200 // Os09g0369000 // Os02g0176700 // Os06g0700700 // Os01g0855400 // Os04g0429300 // Os06g0193400 // Os03g0223400 // Os08g0458600 // Os07g0406800 // Os07g0437500 // Os03g0712800 // Os07g0139500 // Os01g0191300 // Os03g0689300 // Os04g0476100 // Os01g0104500 // Os05g0228400
6	GO:0006810	P	transport	10	131	1638	24075	0.4	1	// Os05g0477900 // Os05g0447200 // Os02g0176700 // Os09g0364800 // Os06g0700700 // Os03g0235900 // Os03g0207200 // Os03g0689300 // Os02g0530100 // Os03g0237100
6	GO:0006811	P	ion transport	6	131	408	24075	0.025	0.6	// Os02g0176700 // Os09g0364800 // Os06g0700700 // Os03g0689300 // Os02g0530100 // Os03g0237100
6	GO:0006812	P	cation transport	6	131	348	24075	0.013	0.58	// Os02g0176700 // Os09g0364800 // Os06g0700700 // Os03g0689300 // Os02g0530100 // Os03g0237100
6	GO:0006950	P	response to stress	8	131	873	24075	0.11	1	// Os07g0635900 // Os03g0750000 // Os05g0453700 // Os04g0465100 // Os07g0673400 // Os02g0120800 // Os03g0737000 // Os04g0432000
6	GO:0008152	P	metabolic process	55	131	14398	24075	1	1	// Os01g0877400 // Os07g0139500 // Os01g0261200 // Os02g0664300 // Os03g0223400 // Os03g0825300 // Os04g0476100 // Os06g0675700 // Os05g0268500 // Os04g0658000 // Os01g0709500 // Os01g0898500 // Os01g0191300 // Os07g0607700 // Os03g0237100 // Os05g0228400 // Os01g0757200 // Os03g0268400 // Os01g0812000 // Os05g0567100 // Os11g0156200 // Os04g0429300 // Os01g0663400 // Os06g0167400 // Os07g0406800…
6	GO:0009058	P	biosynthetic process	22	131	6085	24075	0.99	1	// Os01g0877400 // Os01g0261200 // Os03g0223400 // Os07g0139500 // Os07g0406800 // Os03g0268400 // Os01g0812000 // Os04g0429300 // Os03g0712800 // Os01g0104500 // Os01g0191300 // Os01g0855400 // Os02g0176700 // Os06g0193400 // Os06g0679500 // Os01g0633100 // Os03g0689300 // Os09g0369000 // Os05g0228400 // Os06g0700700 // Os12g0267200 // Os08g0458600
6	GO:0009059	P	macromolecule biosynthetic process	15	131	5252	24075	1	1	// Os01g0812000 // Os01g0877400 // Os07g0139500 // Os01g0261200 // Os08g0458600 // Os01g0855400 // Os04g0429300 // Os06g0193400 // Os09g0369000 // Os07g0406800 // Os06g0679500 // Os01g0633100 // Os01g0191300 // Os01g0104500 // Os05g0228400
6	GO:0009308	P	amine metabolic process	6	131	380	24075	0.019	0.58	// Os04g0543900 // Os03g0223400 // Os03g0685300 // Os04g0476100 // Os07g0437500 // Os03g0712800
6	GO:0009889	P	regulation of biosynthetic process	11	131	1564	24075	0.23	1	// Os01g0812000 // Os01g0191300 // Os01g0261200 // Os08g0458600 // Os01g0855400 // Os04g0429300 // Os06g0193400 // Os09g0369000 // Os07g0139500 // Os01g0104500 // Os05g0228400
6	GO:0009987	P	cellular process	35	131	12839	24075	1	1	// Os01g0877400 // Os05g0447200 // Os01g0261200 // Os03g0223400 // Os03g0825300 // Os07g0169600 // Os01g0709500 // Os07g0139500 // Os03g0207200 // Os01g0191300 // Os05g0228400 // Os01g0757200 // Os01g0812000 // Os04g0429300 // Os07g0406800 // Os03g0712800 // Os01g0104500 // Os01g0837300 // Os04g0543900 // Os01g0855400 // Os02g0176700 // Os03g0761100 // Os06g0193400 // Os02g0102900 // Os07g0437500…
6	GO:0010467	P	gene expression	11	131	2424	24075	0.78	1	// Os01g0812000 // Os01g0191300 // Os01g0261200 // Os08g0458600 // Os01g0855400 // Os04g0429300 // Os06g0193400 // Os09g0369000 // Os07g0139500 // Os01g0104500 // Os05g0228400
6	GO:0010468	P	regulation of gene expression	11	131	1577	24075	0.24	1	// Os01g0812000 // Os01g0191300 // Os01g0261200 // Os08g0458600 // Os01g0855400 // Os04g0429300 // Os06g0193400 // Os09g0369000 // Os07g0139500 // Os01g0104500 // Os05g0228400
6	GO:0010556	P	regulation of macromolecule biosynthetic process	11	131	1564	24075	0.23	1	// Os01g0812000 // Os01g0191300 // Os01g0261200 // Os08g0458600 // Os01g0855400 // Os04g0429300 // Os06g0193400 // Os09g0369000 // Os07g0139500 // Os01g0104500 // Os05g0228400
6	GO:0016070	P	RNA metabolic process	5	131	1088	24075	0.71	1	// Os01g0812000 // Os08g0458600 // Os09g0369000 // Os07g0406800 // Os01g0261200
6	GO:0019219	P	regulation of nucleobase, nucleoside, nucleotide and nucleic acid metabolic process	11	131	1520	24075	0.21	1	// Os01g0812000 // Os01g0191300 // Os01g0261200 // Os08g0458600 // Os01g0855400 // Os04g0429300 // Os06g0193400 // Os09g0369000 // Os07g0139500 // Os01g0104500 // Os05g0228400
6	GO:0019222	P	regulation of metabolic process	11	131	1664	24075	0.3	1	// Os01g0812000 // Os01g0191300 // Os01g0261200 // Os08g0458600 // Os01g0855400 // Os04g0429300 // Os06g0193400 // Os09g0369000 // Os07g0139500 // Os01g0104500 // Os05g0228400
6	GO:0019538	P	protein metabolic process	18	131	4333	24075	0.92	1	// Os05g0567100 // Os01g0877400 // Os02g0102900 // Os08g0556900 // Os11g0156200 // Os02g0664300 // Os03g0367900 // Os03g0761100 // Os03g0825300 // Os01g0663400 // Os05g0268500 // Os01g0709500 // Os06g0679500 // Os11g0255300 // Os02g0709400 // Os04g0537900 // Os04g0432000 // Os09g0479900
6	GO:0019752	P	carboxylic acid metabolic process	7	131	473	24075	0.016	0.58	// Os04g0543900 // Os01g0757200 // Os03g0223400 // Os03g0685300 // Os07g0437500 // Os07g0169600 // Os03g0712800
6	GO:0023046	P	signaling process	5	131	279	24075	0.019	0.58	// Os02g0120800 // Os08g0458600 // Os05g0447200 // Os04g0432000 // Os02g0469300
6	GO:0023052	P	signaling	5	131	447	24075	0.099	1	// Os02g0120800 // Os08g0458600 // Os05g0447200 // Os04g0432000 // Os02g0469300
6	GO:0023060	P	signal transmission	5	131	279	24075	0.019	0.58	// Os02g0120800 // Os08g0458600 // Os05g0447200 // Os04g0432000 // Os02g0469300
6	GO:0030001	P	metal ion transport	5	131	214	24075	0.0069	0.58	// Os02g0530100 // Os06g0700700 // Os02g0176700 // Os09g0364800 // Os03g0237100
6	GO:0031323	P	regulation of cellular metabolic process	11	131	1593	24075	0.25	1	// Os01g0812000 // Os01g0191300 // Os01g0261200 // Os08g0458600 // Os01g0855400 // Os04g0429300 // Os06g0193400 // Os09g0369000 // Os07g0139500 // Os01g0104500 // Os05g0228400
6	GO:0031326	P	regulation of cellular biosynthetic process	11	131	1564	24075	0.23	1	// Os01g0812000 // Os01g0191300 // Os01g0261200 // Os08g0458600 // Os01g0855400 // Os04g0429300 // Os06g0193400 // Os09g0369000 // Os07g0139500 // Os01g0104500 // Os05g0228400
6	GO:0032774	P	RNA biosynthetic process	5	131	788	24075	0.43	1	// Os01g0812000 // Os08g0458600 // Os09g0369000 // Os07g0406800 // Os01g0261200
6	GO:0034641	P	cellular nitrogen compound metabolic process	5	131	435	24075	0.091	1	// Os07g0437500 // Os04g0543900 // Os03g0223400 // Os03g0712800 // Os03g0685300
6	GO:0034645	P	cellular macromolecule biosynthetic process	15	131	5248	24075	1	1	// Os01g0812000 // Os01g0877400 // Os07g0139500 // Os01g0261200 // Os08g0458600 // Os01g0855400 // Os04g0429300 // Os06g0193400 // Os09g0369000 // Os07g0406800 // Os06g0679500 // Os01g0633100 // Os01g0191300 // Os01g0104500 // Os05g0228400
6	GO:0042180	P	cellular ketone metabolic process	7	131	480	24075	0.017	0.58	// Os04g0543900 // Os01g0757200 // Os03g0223400 // Os03g0685300 // Os07g0437500 // Os07g0169600 // Os03g0712800
6	GO:0043170	P	macromolecule metabolic process	32	131	10433	24075	1	1	// Os01g0877400 // Os02g0102900 // Os01g0261200 // Os02g0664300 // Os03g0825300 // Os05g0268500 // Os01g0709500 // Os07g0139500 // Os05g0228400 // Os01g0812000 // Os11g0156200 // Os04g0429300 // Os01g0663400 // Os07g0406800 // Os01g0104500 // Os01g0191300 // Os08g0556900 // Os01g0855400 // Os03g0761100 // Os06g0193400 // Os02g0709400 // Os03g0367900 // Os06g0679500 // Os01g0633100 // Os05g0567100…
6	GO:0043412	P	macromolecule modification	6	131	1979	24075	0.96	1	// Os01g0877400 // Os03g0761100 // Os03g0825300 // Os01g0709500 // Os06g0679500 // Os04g0432000
6	GO:0043436	P	oxoacid metabolic process	7	131	473	24075	0.016	0.58	// Os04g0543900 // Os01g0757200 // Os03g0223400 // Os03g0685300 // Os07g0437500 // Os07g0169600 // Os03g0712800
6	GO:0044106	P	cellular amine metabolic process	5	131	333	24075	0.037	0.77	// Os07g0437500 // Os04g0543900 // Os03g0223400 // Os03g0712800 // Os03g0685300
6	GO:0044237	P	cellular metabolic process	31	131	10696	24075	1	1	// Os01g0877400 // Os01g0757200 // Os01g0261200 // Os03g0223400 // Os03g0825300 // Os07g0169600 // Os01g0709500 // Os07g0139500 // Os01g0191300 // Os05g0228400 // Os02g0102900 // Os01g0812000 // Os04g0429300 // Os07g0406800 // Os04g0432000 // Os01g0104500 // Os01g0837300 // Os04g0543900 // Os01g0855400 // Os02g0176700 // Os03g0761100 // Os06g0193400 // Os07g0437500 // Os03g0685300 // Os06g0679500…
6	GO:0044238	P	primary metabolic process	46	131	11969	24075	1	1	// Os01g0877400 // Os07g0139500 // Os01g0261200 // Os02g0664300 // Os03g0223400 // Os03g0825300 // Os06g0675700 // Os05g0268500 // Os04g0658000 // Os01g0709500 // Os01g0898500 // Os01g0191300 // Os05g0228400 // Os01g0757200 // Os01g0812000 // Os11g0156200 // Os04g0429300 // Os01g0663400 // Os07g0406800 // Os03g0712800 // Os01g0104500 // Os04g0543900 // Os08g0556900 // Os02g0176700 // Os01g0855400…
6	GO:0044249	P	cellular biosynthetic process	20	131	5890	24075	1	1	// Os01g0812000 // Os01g0877400 // Os07g0139500 // Os01g0261200 // Os09g0369000 // Os02g0176700 // Os01g0855400 // Os04g0429300 // Os06g0193400 // Os03g0223400 // Os08g0458600 // Os07g0406800 // Os06g0700700 // Os03g0712800 // Os06g0679500 // Os01g0633100 // Os01g0191300 // Os03g0689300 // Os01g0104500 // Os05g0228400
6	GO:0044260	P	cellular macromolecule metabolic process	20	131	9350	24075	1	1	// Os01g0812000 // Os01g0877400 // Os07g0139500 // Os05g0228400 // Os01g0261200 // Os08g0458600 // Os03g0761100 // Os01g0855400 // Os04g0429300 // Os06g0193400 // Os09g0369000 // Os02g0102900 // Os07g0406800 // Os03g0825300 // Os06g0679500 // Os01g0633100 // Os01g0191300 // Os01g0104500 // Os04g0432000 // Os01g0709500
6	GO:0044267	P	cellular protein metabolic process	7	131	2877	24075	1	1	// Os01g0877400 // Os02g0102900 // Os03g0761100 // Os03g0825300 // Os01g0709500 // Os06g0679500 // Os04g0432000
6	GO:0044281	P	small molecule metabolic process	11	131	1034	24075	0.027	0.6	// Os04g0543900 // Os01g0757200 // Os02g0176700 // Os03g0223400 // Os03g0685300 // Os07g0437500 // Os06g0700700 // Os07g0169600 // Os01g0633100 // Os03g0689300 // Os03g0712800
6	GO:0045449	P	regulation of transcription	11	131	1513	24075	0.2	1	// Os01g0812000 // Os01g0191300 // Os01g0261200 // Os08g0458600 // Os01g0855400 // Os04g0429300 // Os06g0193400 // Os09g0369000 // Os07g0139500 // Os01g0104500 // Os05g0228400
6	GO:0050789	P	regulation of biological process	16	131	2027	24075	0.086	1	// Os01g0812000 // Os01g0191300 // Os05g0447200 // Os01g0261200 // Os01g0104500 // Os01g0855400 // Os04g0429300 // Os06g0193400 // Os09g0369000 // Os05g0228400 // Os07g0139500 // Os02g0120800 // Os08g0458600 // Os06g0498800 // Os04g0432000 // Os02g0469300
6	GO:0050794	P	regulation of cellular process	15	131	1955	24075	0.11	1	// Os01g0812000 // Os01g0191300 // Os05g0447200 // Os01g0261200 // Os08g0458600 // Os01g0855400 // Os04g0429300 // Os06g0193400 // Os09g0369000 // Os05g0228400 // Os07g0139500 // Os02g0120800 // Os01g0104500 // Os04g0432000 // Os02g0469300
6	GO:0050896	P	response to stimulus	9	131	1026	24075	0.11	1	// Os03g0737000 // Os05g0447200 // Os03g0750000 // Os05g0453700 // Os04g0465100 // Os07g0673400 // Os02g0120800 // Os07g0635900 // Os04g0432000
6	GO:0051171	P	regulation of nitrogen compound metabolic process	11	131	1520	24075	0.21	1	// Os01g0812000 // Os01g0191300 // Os01g0261200 // Os08g0458600 // Os01g0855400 // Os04g0429300 // Os06g0193400 // Os09g0369000 // Os07g0139500 // Os01g0104500 // Os05g0228400
6	GO:0051179	P	localization	10	131	1651	24075	0.41	1	// Os05g0477900 // Os05g0447200 // Os02g0176700 // Os09g0364800 // Os06g0700700 // Os03g0235900 // Os03g0207200 // Os03g0689300 // Os02g0530100 // Os03g0237100
6	GO:0051234	P	establishment of localization	10	131	1638	24075	0.4	1	// Os05g0477900 // Os05g0447200 // Os02g0176700 // Os09g0364800 // Os06g0700700 // Os03g0235900 // Os03g0207200 // Os03g0689300 // Os02g0530100 // Os03g0237100
6	GO:0060255	P	regulation of macromolecule metabolic process	11	131	1640	24075	0.28	1	// Os01g0812000 // Os01g0191300 // Os01g0261200 // Os08g0458600 // Os01g0855400 // Os04g0429300 // Os06g0193400 // Os09g0369000 // Os07g0139500 // Os01g0104500 // Os05g0228400
6	GO:0065007	P	biological regulation	17	131	2125	24075	0.071	1	// Os01g0812000 // Os01g0191300 // Os05g0447200 // Os01g0261200 // Os01g0104500 // Os01g0855400 // Os04g0429300 // Os06g0193400 // Os09g0369000 // Os05g0228400 // Os07g0139500 // Os02g0120800 // Os08g0458600 // Os02g0469300 // Os06g0498800 // Os04g0432000 // Os09g0479900
6	GO:0080090	P	regulation of primary metabolic process	11	131	1626	24075	0.27	1	// Os01g0812000 // Os01g0191300 // Os01g0261200 // Os08g0458600 // Os01g0855400 // Os04g0429300 // Os06g0193400 // Os09g0369000 // Os07g0139500 // Os01g0104500 // Os05g0228400
6	GO:0000166	F	nucleotide binding	19	131	3874	24075	0.72	1	// Os03g0712800 // Os08g0249400 // Os07g0562800 // Os02g0714000 // Os04g0280200 // Os06g0255200 // Os02g0176700 // Os03g0223400 // Os03g0825300 // Os11g0447300 // Os02g0102900 // Os06g0700700 // Os01g0709500 // Os02g0120800 // Os04g0311100 // Os03g0689300 // Os02g0469300 // Os04g0432000 // Os03g0286500
6	GO:0001882	F	nucleoside binding	14	131	3257	24075	0.86	1	// Os03g0712800 // Os07g0562800 // Os02g0102900 // Os06g0255200 // Os02g0176700 // Os03g0223400 // Os03g0825300 // Os06g0700700 // Os01g0709500 // Os04g0311100 // Os03g0689300 // Os04g0280200 // Os04g0432000 // Os02g0469300
6	GO:0001883	F	purine nucleoside binding	14	131	3247	24075	0.86	1	// Os03g0712800 // Os07g0562800 // Os02g0102900 // Os06g0255200 // Os02g0176700 // Os03g0223400 // Os03g0825300 // Os06g0700700 // Os01g0709500 // Os04g0311100 // Os03g0689300 // Os04g0280200 // Os04g0432000 // Os02g0469300
6	GO:0003676	F	nucleic acid binding	13	131	8251	24075	1	1	// Os01g0812000 // Os01g0780800 // Os01g0191300 // Os02g0714000 // Os06g0651300 // Os01g0261200 // Os06g0255200 // Os01g0855400 // Os08g0249400 // Os03g0286500 // Os07g0139500 // Os01g0104500 // Os09g0369000
6	GO:0003677	F	DNA binding	9	131	5059	24075	1	1	// Os01g0812000 // Os01g0780800 // Os01g0191300 // Os01g0261200 // Os06g0255200 // Os01g0855400 // Os07g0139500 // Os01g0104500 // Os09g0369000
6	GO:0003824	F	catalytic activity	55	131	12724	24075	0.99	1	// Os01g0877400 // Os01g0757200 // Os01g0201100 // Os07g0607400 // Os02g0664300 // Os03g0223400 // Os03g0825300 // Os04g0476100 // Os06g0675700 // Os05g0268500 // Os04g0658000 // Os01g0709500 // Os01g0898500 // Os07g0607700 // Os03g0237100 // Os07g0406800 // Os03g0268400 // Os05g0567100 // Os06g0255200 // Os01g0167900 // Os11g0156200 // Os08g0258200 // Os01g0663400 // Os06g0167400 // Os03g0712800…
6	GO:0004175	F	endopeptidase activity	9	131	856	24075	0.046	1	// Os05g0567100 // Os11g0255300 // Os08g0556900 // Os02g0664300 // Os02g0709400 // Os04g0537900 // Os01g0663400 // Os04g0432000 // Os09g0479900
6	GO:0005215	F	transporter activity	5	131	941	24075	0.58	1	// Os06g0700700 // Os03g0689300 // Os03g0235900 // Os02g0176700 // Os05g0447200
6	GO:0005488	F	binding	48	131	16823	24075	1	1	// Os02g0714000 // Os06g0651300 // Os01g0261200 // Os03g0223400 // Os03g0825300 // Os04g0476100 // Os04g0658000 // Os01g0709500 // Os07g0139500 // Os03g0207200 // Os04g0311100 // Os06g0677300 // Os02g0102900 // Os01g0812000 // Os03g0286500 // Os06g0255200 // Os09g0364800 // Os08g0258200 // Os11g0447300 // Os03g0712800 // Os01g0104500 // Os01g0837300 // Os04g0543900 // Os11g0151700 // Os02g0176700…
6	GO:0005515	F	protein binding	7	131	2460	24075	0.98	1	// Os07g0562800 // Os02g0102900 // Os01g0855400 // Os08g0258200 // Os08g0494300 // Os03g0207200 // Os09g0479900
6	GO:0005524	F	ATP binding	14	131	3085	24075	0.8	1	// Os03g0712800 // Os07g0562800 // Os02g0102900 // Os06g0255200 // Os02g0176700 // Os03g0223400 // Os03g0825300 // Os06g0700700 // Os01g0709500 // Os04g0311100 // Os03g0689300 // Os04g0280200 // Os04g0432000 // Os02g0469300
6	GO:0008233	F	peptidase activity	13	131	1489	24075	0.063	1	// Os05g0567100 // Os11g0255300 // Os08g0556900 // Os11g0156200 // Os02g0664300 // Os03g0367900 // Os02g0709400 // Os05g0268500 // Os01g0663400 // Os04g0537900 // Os02g0117700 // Os04g0432000 // Os09g0479900
6	GO:0008234	F	cysteine-type peptidase activity	5	131	554	24075	0.19	1	// Os03g0367900 // Os04g0537900 // Os11g0255300 // Os08g0556900 // Os02g0709400
6	GO:0008236	F	serine-type peptidase activity	5	131	201	24075	0.0053	0.4	// Os02g0664300 // Os05g0268500 // Os11g0156200 // Os04g0432000 // Os09g0479900
6	GO:0016301	F	kinase activity	6	131	1750	24075	0.92	1	// Os01g0709500 // Os08g0258200 // Os03g0825300 // Os01g0167900 // Os04g0432000 // Os02g0469300
6	GO:0016462	F	pyrophosphatase activity	5	131	743	24075	0.38	1	// Os03g0689300 // Os06g0700700 // Os02g0176700 // Os06g0255200 // Os07g0562800
6	GO:0016491	F	oxidoreductase activity	6	131	1672	24075	0.9	1	// Os04g0543900 // Os01g0757200 // Os04g0476100 // Os07g0169600 // Os04g0465100 // Os03g0237100
6	GO:0016740	F	transferase activity	22	131	6190	24075	0.99	1	// Os01g0877400 // Os01g0201100 // Os03g0685300 // Os01g0709500 // Os07g0607700 // Os07g0406800 // Os03g0268400 // Os08g0258200 // Os06g0167400 // Os03g0197000 // Os01g0374000 // Os03g0825300 // Os06g0679500 // Os01g0633100 // Os02g0117700 // Os04g0432000 // Os02g0469300 // Os01g0106700 // Os12g0607000 // Os12g0267200 // Os01g0167900 // Os04g0280200
6	GO:0016772	F	transferase activity, transferring phosphorus-containing groups	12	131	4781	24075	1	1	// Os03g0268400 // Os01g0167900 // Os04g0432000 // Os08g0258200 // Os01g0709500 // Os01g0633100 // Os01g0106700 // Os03g0825300 // Os04g0280200 // Os02g0117700 // Os07g0406800 // Os02g0469300
6	GO:0016773	F	phosphotransferase activity, alcohol group as acceptor	6	131	1726	24075	0.91	1	// Os01g0106700 // Os03g0825300 // Os01g0709500 // Os02g0469300 // Os04g0432000 // Os04g0280200
6	GO:0016787	F	hydrolase activity	24	131	4901	24075	0.75	1	// Os07g0607400 // Os02g0664300 // Os06g0675700 // Os05g0268500 // Os01g0898500 // Os06g0255200 // Os11g0156200 // Os01g0663400 // Os08g0556900 // Os11g0151700 // Os02g0176700 // Os03g0761100 // Os02g0709400 // Os03g0367900 // Os03g0689300 // Os05g0567100 // Os02g0117700 // Os04g0432000 // Os07g0562800 // Os11g0255300 // Os06g0700700 // Os04g0537900 // Os10g0465700 // Os09g0479900
6	GO:0016817	F	hydrolase activity, acting on acid anhydrides	5	131	764	24075	0.4	1	// Os03g0689300 // Os06g0700700 // Os02g0176700 // Os06g0255200 // Os07g0562800
6	GO:0016818	F	hydrolase activity, acting on acid anhydrides, in phosphorus-containing anhydrides	5	131	759	24075	0.4	1	// Os03g0689300 // Os06g0700700 // Os02g0176700 // Os06g0255200 // Os07g0562800
6	GO:0017076	F	purine nucleotide binding	16	131	3456	24075	0.79	1	// Os03g0712800 // Os07g0562800 // Os02g0102900 // Os06g0255200 // Os02g0176700 // Os03g0223400 // Os03g0825300 // Os11g0447300 // Os06g0700700 // Os01g0709500 // Os02g0120800 // Os04g0311100 // Os03g0689300 // Os04g0280200 // Os04g0432000 // Os02g0469300
6	GO:0017111	F	nucleoside-triphosphatase activity	5	131	726	24075	0.36	1	// Os03g0689300 // Os06g0700700 // Os02g0176700 // Os06g0255200 // Os07g0562800
6	GO:0017171	F	serine hydrolase activity	5	131	201	24075	0.0053	0.4	// Os02g0664300 // Os05g0268500 // Os11g0156200 // Os04g0432000 // Os09g0479900
6	GO:0030528	F	transcription regulator activity	5	131	987	24075	0.63	1	// Os05g0228400 // Os08g0458600 // Os09g0369000 // Os04g0429300 // Os06g0193400
6	GO:0030554	F	adenyl nucleotide binding	14	131	3247	24075	0.86	1	// Os03g0712800 // Os07g0562800 // Os02g0102900 // Os06g0255200 // Os02g0176700 // Os03g0223400 // Os03g0825300 // Os06g0700700 // Os01g0709500 // Os04g0311100 // Os03g0689300 // Os04g0280200 // Os04g0432000 // Os02g0469300
6	GO:0032553	F	ribonucleotide binding	16	131	3292	24075	0.72	1	// Os03g0712800 // Os07g0562800 // Os02g0102900 // Os06g0255200 // Os02g0176700 // Os03g0223400 // Os03g0825300 // Os11g0447300 // Os06g0700700 // Os01g0709500 // Os02g0120800 // Os04g0311100 // Os03g0689300 // Os04g0280200 // Os04g0432000 // Os02g0469300
6	GO:0032555	F	purine ribonucleotide binding	16	131	3292	24075	0.72	1	// Os03g0712800 // Os07g0562800 // Os02g0102900 // Os06g0255200 // Os02g0176700 // Os03g0223400 // Os03g0825300 // Os11g0447300 // Os06g0700700 // Os01g0709500 // Os02g0120800 // Os04g0311100 // Os03g0689300 // Os04g0280200 // Os04g0432000 // Os02g0469300
6	GO:0032559	F	adenyl ribonucleotide binding	14	131	3087	24075	0.8	1	// Os03g0712800 // Os07g0562800 // Os02g0102900 // Os06g0255200 // Os02g0176700 // Os03g0223400 // Os03g0825300 // Os06g0700700 // Os01g0709500 // Os04g0311100 // Os03g0689300 // Os04g0280200 // Os04g0432000 // Os02g0469300
6	GO:0043167	F	ion binding	13	131	5700	24075	1	1	// Os06g0651300 // Os11g0151700 // Os03g0761100 // Os09g0364800 // Os08g0258200 // Os04g0465100 // Os08g0494300 // Os06g0700700 // Os07g0169600 // Os06g0677300 // Os04g0476100 // Os02g0530100 // Os10g0465700
6	GO:0043169	F	cation binding	13	131	5696	24075	1	1	// Os06g0651300 // Os11g0151700 // Os03g0761100 // Os09g0364800 // Os08g0258200 // Os04g0465100 // Os08g0494300 // Os06g0700700 // Os07g0169600 // Os06g0677300 // Os04g0476100 // Os02g0530100 // Os10g0465700
6	GO:0046872	F	metal ion binding	12	131	5476	24075	1	1	// Os06g0651300 // Os11g0151700 // Os03g0761100 // Os09g0364800 // Os08g0258200 // Os04g0465100 // Os08g0494300 // Os06g0700700 // Os07g0169600 // Os04g0476100 // Os02g0530100 // Os06g0677300
6	GO:0046914	F	transition metal ion binding	9	131	4875	24075	1	1	// Os06g0651300 // Os03g0761100 // Os08g0258200 // Os04g0476100 // Os08g0494300 // Os07g0169600 // Os04g0465100 // Os02g0530100 // Os06g0677300
6	GO:0070011	F	peptidase activity, acting on L-amino acid peptides	13	131	1470	24075	0.058	1	// Os05g0567100 // Os11g0255300 // Os08g0556900 // Os11g0156200 // Os02g0664300 // Os03g0367900 // Os02g0709400 // Os05g0268500 // Os01g0663400 // Os04g0537900 // Os02g0117700 // Os04g0432000 // Os09g0479900
6	GO:0005622	C	intracellular	85	131	4116	24075	1.2e-33	7.1e-33	// Os05g0495300 // Os07g0672500 // Os04g0527000 // Os01g0877400 // Os02g0102900 // Os01g0201100 // Os05g0122600 // Os07g0607400 // Os03g0168500 // Os03g0223400 // Os03g0685300 // Os02g0557200 // Os03g0817900 // Os05g0567100 // Os05g0268500 // Os01g0709500 // Os07g0139500 // Os03g0227800 // Os01g0191300 // Os01g0236300 // Os11g0447300 // Os07g0607700 // Os05g0228400 // Os03g0268400 // Os01g0812000…
6	GO:0005623	C	cell	104	131	5945	24075	4.7e-39	3.2e-38	// Os05g0447200 // Os05g0122600 // Os02g0557200 // Os05g0268500 // Os01g0898500 // Os07g0607700 // Os01g0812000 // Os07g0581000 // Os06g0167400 // Os01g0261200 // Os04g0429300 // Os08g0258200 // Os01g0663400 // Os03g0291800 // Os05g0354400 // Os03g0737000 // Os01g0839900 // Os04g0543900 // Os08g0556900 // Os06g0193400 // Os04g0465100 // Os07g0673400 // Os01g0168600 // Os06g0679500 // Os01g0633100…
6	GO:0005634	C	nucleus	11	131	1884	24075	0.45	1	// Os01g0812000 // Os09g0369000 // Os01g0261200 // Os01g0780800 // Os01g0855400 // Os04g0429300 // Os06g0193400 // Os07g0406800 // Os07g0139500 // Os12g0290600 // Os05g0228400
6	GO:0005737	C	cytoplasm	73	131	1263	24075	8e-57	3.3e-55	// Os05g0495300 // Os07g0672500 // Os04g0527000 // Os01g0877400 // Os02g0102900 // Os01g0201100 // Os05g0122600 // Os02g0664300 // Os03g0168500 // Os03g0223400 // Os03g0685300 // Os02g0557200 // Os05g0268500 // Os01g0709500 // Os03g0227800 // Os01g0191300 // Os01g0236300 // Os07g0607700 // Os03g0268400 // Os05g0567100 // Os06g0651300 // Os08g0497600 // Os10g0372100 // Os06g0675700 // Os07g0607400…
6	GO:0005739	C	mitochondrion	25	131	162	24075	7.1e-28	3.9e-27	// Os01g0201100 // Os02g0664300 // Os03g0168500 // Os03g0227800 // Os03g0685300 // Os05g0268500 // Os03g0268400 // Os06g0651300 // Os10g0372100 // Os08g0361000 // Os08g0258200 // Os03g0291800 // Os05g0556800 // Os05g0354400 // Os03g0737000 // Os01g0837300 // Os04g0543900 // Os03g0761100 // Os07g0673400 // Os01g0168600 // Os06g0679500 // Os04g0117300 // Os03g0817900 // Os05g0409500 // Os10g0213800
6	GO:0005886	C	plasma membrane	5	131	44	24075	6.8e-06	3.1e-05	// Os11g0621300 // Os07g0635900 // Os05g0447200 // Os03g0299600 // Os05g0342000
6	GO:0009536	C	plastid	17	131	37	24075	4e-26	2e-25	// Os07g0672500 // Os07g0562800 // Os02g0102900 // Os08g0497600 // Os10g0417800 // Os05g0122600 // Os08g0249400 // Os02g0296400 // Os06g0167400 // Os10g0465700 // Os04g0527000 // Os01g0709500 // Os09g0453100 // Os05g0148500 // Os07g0607700 // Os09g0369000 // Os01g0667400
6	GO:0016020	C	membrane	29	131	2115	24075	3.2e-06	1.5e-05	// Os01g0877400 // Os05g0447200 // Os01g0201100 // Os04g0658000 // Os01g0898500 // Os03g0207200 // Os06g0677300 // Os04g0605500 // Os07g0581000 // Os03g0299600 // Os05g0556800 // Os06g0700700 // Os01g0104500 // Os01g0297700 // Os02g0809800 // Os11g0508600 // Os02g0176700 // Os02g0709400 // Os02g0120800 // Os06g0679500 // Os11g0621300 // Os03g0689300 // Os03g0286900 // Os05g0342000 // Os02g0513100…
6	GO:0016021	C	integral to membrane	12	131	752	24075	0.00092	0.0039	// Os01g0877400 // Os05g0447200 // Os03g0286900 // Os02g0513100 // Os02g0176700 // Os05g0556800 // Os06g0700700 // Os06g0679500 // Os11g0508600 // Os07g0581000 // Os03g0689300 // Os07g0635900
6	GO:0016023	C	cytoplasmic membrane-bounded vesicle	26	131	26	24075	3.7e-46	7.5e-45	// Os07g0607400 // Os06g0675700 // Os04g0537900 // Os01g0236300 // Os11g0156200 // Os01g0663400 // Os01g0374000 // Os05g0495300 // Os02g0285300 // Os01g0191300 // Os08g0556900 // Os01g0839900 // Os11g0508600 // Os04g0465100 // Os02g0557200 // Os05g0567100 // Os03g0197000 // Os05g0477900 // Os11g0255300 // Os03g0760800 // Os03g0286900 // Os08g0494300 // Os07g0635900 // Os04g0483200 // Os07g0600700…
6	GO:0031224	C	intrinsic to membrane	12	131	775	24075	0.0012	0.0048	// Os01g0877400 // Os05g0447200 // Os03g0286900 // Os02g0513100 // Os02g0176700 // Os05g0556800 // Os06g0700700 // Os06g0679500 // Os11g0508600 // Os07g0581000 // Os03g0689300 // Os07g0635900
6	GO:0031410	C	cytoplasmic vesicle	26	131	34	24075	5e-44	5.1e-43	// Os07g0607400 // Os06g0675700 // Os04g0537900 // Os01g0236300 // Os11g0156200 // Os01g0663400 // Os01g0374000 // Os05g0495300 // Os02g0285300 // Os01g0191300 // Os08g0556900 // Os01g0839900 // Os11g0508600 // Os04g0465100 // Os02g0557200 // Os05g0567100 // Os03g0197000 // Os05g0477900 // Os11g0255300 // Os03g0760800 // Os03g0286900 // Os08g0494300 // Os07g0635900 // Os04g0483200 // Os07g0600700…
6	GO:0031982	C	vesicle	26	131	34	24075	5e-44	5.1e-43	// Os07g0607400 // Os06g0675700 // Os04g0537900 // Os01g0236300 // Os11g0156200 // Os01g0663400 // Os01g0374000 // Os05g0495300 // Os02g0285300 // Os01g0191300 // Os08g0556900 // Os01g0839900 // Os11g0508600 // Os04g0465100 // Os02g0557200 // Os05g0567100 // Os03g0197000 // Os05g0477900 // Os11g0255300 // Os03g0760800 // Os03g0286900 // Os08g0494300 // Os07g0635900 // Os04g0483200 // Os07g0600700…
6	GO:0031988	C	membrane-bounded vesicle	26	131	26	24075	3.7e-46	7.5e-45	// Os07g0607400 // Os06g0675700 // Os04g0537900 // Os01g0236300 // Os11g0156200 // Os01g0663400 // Os01g0374000 // Os05g0495300 // Os02g0285300 // Os01g0191300 // Os08g0556900 // Os01g0839900 // Os11g0508600 // Os04g0465100 // Os02g0557200 // Os05g0567100 // Os03g0197000 // Os05g0477900 // Os11g0255300 // Os03g0760800 // Os03g0286900 // Os08g0494300 // Os07g0635900 // Os04g0483200 // Os07g0600700…
6	GO:0043226	C	organelle	79	131	2859	24075	3.2e-39	2.6e-38	// Os05g0495300 // Os07g0672500 // Os04g0527000 // Os01g0877400 // Os02g0102900 // Os01g0201100 // Os05g0122600 // Os07g0607400 // Os03g0168500 // Os01g0837300 // Os03g0685300 // Os02g0557200 // Os03g0817900 // Os05g0268500 // Os01g0709500 // Os07g0139500 // Os03g0227800 // Os01g0191300 // Os01g0236300 // Os07g0607700 // Os05g0228400 // Os03g0268400 // Os01g0812000 // Os05g0567100 // Os06g0651300…
6	GO:0043227	C	membrane-bounded organelle	79	131	2319	24075	9.7e-46	1.3e-44	// Os05g0495300 // Os07g0672500 // Os04g0527000 // Os01g0877400 // Os02g0102900 // Os01g0201100 // Os05g0122600 // Os07g0607400 // Os03g0168500 // Os01g0837300 // Os03g0685300 // Os02g0557200 // Os03g0817900 // Os05g0268500 // Os01g0709500 // Os07g0139500 // Os03g0227800 // Os01g0191300 // Os01g0236300 // Os07g0607700 // Os05g0228400 // Os03g0268400 // Os01g0812000 // Os05g0567100 // Os06g0651300…
6	GO:0043229	C	intracellular organelle	79	131	2859	24075	3.2e-39	2.6e-38	// Os05g0495300 // Os07g0672500 // Os04g0527000 // Os01g0877400 // Os02g0102900 // Os01g0201100 // Os05g0122600 // Os07g0607400 // Os03g0168500 // Os01g0837300 // Os03g0685300 // Os02g0557200 // Os03g0817900 // Os05g0268500 // Os01g0709500 // Os07g0139500 // Os03g0227800 // Os01g0191300 // Os01g0236300 // Os07g0607700 // Os05g0228400 // Os03g0268400 // Os01g0812000 // Os05g0567100 // Os06g0651300…
6	GO:0043231	C	intracellular membrane-bounded organelle	79	131	2296	24075	4.7e-46	7.6e-45	// Os05g0495300 // Os07g0672500 // Os04g0527000 // Os01g0877400 // Os02g0102900 // Os01g0201100 // Os05g0122600 // Os07g0607400 // Os03g0168500 // Os01g0837300 // Os03g0685300 // Os02g0557200 // Os03g0817900 // Os05g0268500 // Os01g0709500 // Os07g0139500 // Os03g0227800 // Os01g0191300 // Os01g0236300 // Os07g0607700 // Os05g0228400 // Os03g0268400 // Os01g0812000 // Os05g0567100 // Os06g0651300…
6	GO:0044424	C	intracellular part	83	131	3529	24075	1.1e-36	7.1e-36	// Os05g0495300 // Os07g0672500 // Os04g0527000 // Os01g0877400 // Os02g0102900 // Os01g0201100 // Os05g0122600 // Os07g0607400 // Os03g0168500 // Os03g0223400 // Os03g0685300 // Os02g0557200 // Os03g0817900 // Os05g0268500 // Os01g0709500 // Os07g0139500 // Os03g0227800 // Os01g0191300 // Os01g0236300 // Os07g0607700 // Os05g0228400 // Os03g0268400 // Os01g0812000 // Os05g0567100 // Os06g0651300…
6	GO:0044425	C	membrane part	12	131	1007	24075	0.0094	0.036	// Os01g0877400 // Os05g0447200 // Os03g0286900 // Os02g0513100 // Os02g0176700 // Os05g0556800 // Os06g0700700 // Os06g0679500 // Os11g0508600 // Os07g0581000 // Os03g0689300 // Os07g0635900
6	GO:0044444	C	cytoplasmic part	70	131	966	24075	1.9e-60	1.6e-58	// Os05g0495300 // Os07g0672500 // Os04g0527000 // Os01g0877400 // Os02g0102900 // Os01g0201100 // Os05g0122600 // Os02g0664300 // Os03g0168500 // Os01g0837300 // Os03g0685300 // Os02g0557200 // Os05g0268500 // Os01g0709500 // Os03g0227800 // Os01g0191300 // Os01g0236300 // Os07g0607700 // Os03g0268400 // Os05g0567100 // Os06g0651300 // Os08g0497600 // Os10g0372100 // Os06g0675700 // Os07g0607400…
6	GO:0044464	C	cell part	104	131	5945	24075	4.7e-39	3.2e-38	// Os05g0447200 // Os05g0122600 // Os02g0557200 // Os05g0268500 // Os01g0898500 // Os07g0607700 // Os01g0812000 // Os07g0581000 // Os06g0167400 // Os01g0261200 // Os04g0429300 // Os08g0258200 // Os01g0663400 // Os03g0291800 // Os05g0354400 // Os03g0737000 // Os01g0839900 // Os04g0543900 // Os08g0556900 // Os06g0193400 // Os04g0465100 // Os07g0673400 // Os01g0168600 // Os06g0679500 // Os01g0633100…
7	GO:0000003	P	reproduction	6	114	133	24075	5.2e-05	0.0057	// Os10g0555900 // Os08g0531700 // Os09g0507200 // Os10g0556100 // Os12g0207000 // Os01g0182600
7	GO:0005975	P	carbohydrate metabolic process	5	114	833	24075	0.36	1	// Os07g0209100 // Os05g0518600 // Os02g0696500 // Os04g0413500 // Os03g0224300
7	GO:0006139	P	nucleobase, nucleoside, nucleotide and nucleic acid metabolic process	20	114	6695	24075	1	1	// Os08g0531700 // Os07g0583600 // Os03g0764600 // Os12g0207000 // Os02g0729700 // Os09g0507200 // Os09g0306400 // Os03g0815100 // Os03g0843100 // Os02g0132500 // Os04g0461600 // Os01g0142500 // Os08g0428400 // Os03g0388500 // Os02g0822400 // Os01g0886200 // Os02g0276900 // Os01g0679900 // Os04g0493100 // Os01g0922800
7	GO:0006350	P	transcription	18	114	1629	24075	0.00069	0.0094	// Os08g0531700 // Os07g0583600 // Os03g0764600 // Os12g0207000 // Os02g0729700 // Os09g0507200 // Os09g0306400 // Os03g0843100 // Os02g0132500 // Os03g0815100 // Os01g0142500 // Os08g0428400 // Os03g0388500 // Os02g0822400 // Os01g0886200 // Os02g0276900 // Os04g0493100 // Os01g0922800
7	GO:0006351	P	transcription, DNA-dependent	12	114	786	24075	0.00039	0.0078	// Os08g0531700 // Os07g0583600 // Os01g0922800 // Os02g0132500 // Os02g0729700 // Os09g0507200 // Os09g0306400 // Os03g0843100 // Os12g0207000 // Os03g0388500 // Os08g0428400 // Os01g0886200
7	GO:0006355	P	regulation of transcription, DNA-dependent	12	114	737	24075	0.00022	0.0078	// Os08g0531700 // Os07g0583600 // Os01g0922800 // Os02g0132500 // Os02g0729700 // Os09g0507200 // Os09g0306400 // Os03g0843100 // Os12g0207000 // Os03g0388500 // Os08g0428400 // Os01g0886200
7	GO:0006464	P	protein modification process	5	114	1929	24075	0.96	1	// Os02g0149800 // Os04g0584600 // Os07g0194100 // Os04g0691100 // Os01g0709500
7	GO:0006793	P	phosphorus metabolic process	5	114	1795	24075	0.93	1	// Os02g0149800 // Os04g0584600 // Os07g0194100 // Os04g0691100 // Os01g0709500
7	GO:0006796	P	phosphate metabolic process	5	114	1795	24075	0.93	1	// Os02g0149800 // Os04g0584600 // Os07g0194100 // Os04g0691100 // Os01g0709500
7	GO:0006807	P	nitrogen compound metabolic process	23	114	7073	24075	0.99	1	// Os02g0735200 // Os04g0476100 // Os04g0461600 // Os08g0428400 // Os01g0886200 // Os02g0276900 // Os01g0142500 // Os08g0531700 // Os07g0583600 // Os02g0132500 // Os02g0729700 // Os09g0424300 // Os09g0306400 // Os03g0843100 // Os02g0822400 // Os01g0922800 // Os12g0207000 // Os03g0388500 // Os01g0679900 // Os03g0764600 // Os09g0507200 // Os04g0493100 // Os03g0815100
7	GO:0006810	P	transport	7	114	1638	24075	0.66	1	// Os03g0751600 // Os02g0437200 // Os03g0142800 // Os07g0448800 // Os03g0843100 // Os02g0666200 // Os03g0147400
7	GO:0006950	P	response to stress	10	114	873	24075	0.0089	0.078	// Os03g0353400 // Os01g0314800 // Os03g0750000 // Os03g0388500 // Os04g0691100 // Os01g0739500 // Os09g0486500 // Os03g0121200 // Os08g0428400 // Os07g0661400
7	GO:0008152	P	metabolic process	46	114	14398	24075	1	1	// Os01g0757200 // Os02g0735200 // Os04g0476100 // Os01g0935400 // Os04g0584600 // Os04g0461600 // Os01g0709500 // Os06g0118700 // Os08g0428400 // Os01g0886200 // Os02g0276900 // Os01g0142500 // Os01g0922800 // Os11g0210300 // Os08g0531700 // Os07g0583600 // Os02g0696500 // Os02g0132500 // Os02g0729700 // Os09g0424300 // Os09g0306400 // Os03g0224300 // Os02g0121300 // Os03g0701800 // Os03g0121200…
7	GO:0009058	P	biosynthetic process	22	114	6085	24075	0.95	1	// Os02g0735200 // Os08g0428400 // Os01g0886200 // Os02g0276900 // Os01g0142500 // Os08g0531700 // Os07g0583600 // Os02g0132500 // Os02g0729700 // Os09g0424300 // Os09g0306400 // Os03g0224300 // Os03g0843100 // Os02g0822400 // Os01g0922800 // Os12g0207000 // Os03g0388500 // Os03g0764600 // Os09g0507200 // Os05g0518600 // Os04g0493100 // Os03g0815100
7	GO:0009059	P	macromolecule biosynthetic process	18	114	5252	24075	0.96	1	// Os08g0531700 // Os07g0583600 // Os03g0764600 // Os12g0207000 // Os02g0729700 // Os09g0507200 // Os09g0306400 // Os03g0843100 // Os02g0132500 // Os03g0815100 // Os01g0142500 // Os08g0428400 // Os03g0388500 // Os02g0822400 // Os01g0886200 // Os02g0276900 // Os04g0493100 // Os01g0922800
7	GO:0009628	P	response to abiotic stimulus	5	114	74	24075	3.6e-05	0.0057	// Os02g0437200 // Os04g0691100 // Os07g0661400 // Os12g0284000 // Os03g0353400
7	GO:0009889	P	regulation of biosynthetic process	18	114	1564	24075	0.00043	0.0078	// Os08g0531700 // Os07g0583600 // Os03g0764600 // Os12g0207000 // Os02g0729700 // Os09g0507200 // Os09g0306400 // Os03g0843100 // Os02g0132500 // Os03g0815100 // Os01g0142500 // Os08g0428400 // Os03g0388500 // Os02g0822400 // Os01g0886200 // Os02g0276900 // Os04g0493100 // Os01g0922800
7	GO:0009987	P	cellular process	38	114	12839	24075	1	1	// Os01g0757200 // Os02g0735200 // Os04g0584600 // Os04g0461600 // Os01g0709500 // Os08g0428400 // Os01g0886200 // Os02g0276900 // Os01g0142500 // Os10g0555900 // Os08g0531700 // Os07g0583600 // Os02g0696500 // Os02g0132500 // Os02g0729700 // Os09g0424300 // Os09g0306400 // Os03g0224300 // Os02g0121300 // Os03g0701800 // Os03g0843100 // Os01g0182600 // Os02g0437200 // Os01g0922800 // Os07g0209100…
7	GO:0010467	P	gene expression	19	114	2424	24075	0.02	0.17	// Os08g0531700 // Os07g0583600 // Os03g0764600 // Os12g0207000 // Os02g0729700 // Os09g0507200 // Os09g0306400 // Os03g0843100 // Os02g0132500 // Os03g0815100 // Os01g0142500 // Os08g0428400 // Os03g0388500 // Os02g0822400 // Os01g0886200 // Os02g0276900 // Os01g0679900 // Os04g0493100 // Os01g0922800
7	GO:0010468	P	regulation of gene expression	18	114	1577	24075	0.00047	0.0079	// Os08g0531700 // Os07g0583600 // Os03g0764600 // Os12g0207000 // Os02g0729700 // Os09g0507200 // Os09g0306400 // Os03g0843100 // Os02g0132500 // Os03g0815100 // Os01g0142500 // Os08g0428400 // Os03g0388500 // Os02g0822400 // Os01g0886200 // Os02g0276900 // Os04g0493100 // Os01g0922800
7	GO:0010556	P	regulation of macromolecule biosynthetic process	18	114	1564	24075	0.00043	0.0078	// Os08g0531700 // Os07g0583600 // Os03g0764600 // Os12g0207000 // Os02g0729700 // Os09g0507200 // Os09g0306400 // Os03g0843100 // Os02g0132500 // Os03g0815100 // Os01g0142500 // Os08g0428400 // Os03g0388500 // Os02g0822400 // Os01g0886200 // Os02g0276900 // Os04g0493100 // Os01g0922800
7	GO:0016070	P	RNA metabolic process	13	114	1088	24075	0.0021	0.024	// Os08g0531700 // Os07g0583600 // Os01g0922800 // Os02g0132500 // Os02g0729700 // Os09g0507200 // Os09g0306400 // Os03g0843100 // Os12g0207000 // Os03g0388500 // Os08g0428400 // Os01g0886200 // Os01g0679900
7	GO:0019219	P	regulation of nucleobase, nucleoside, nucleotide and nucleic acid metabolic process	18	114	1520	24075	0.0003	0.0078	// Os08g0531700 // Os07g0583600 // Os03g0764600 // Os12g0207000 // Os02g0729700 // Os09g0507200 // Os09g0306400 // Os03g0843100 // Os02g0132500 // Os03g0815100 // Os01g0142500 // Os08g0428400 // Os03g0388500 // Os02g0822400 // Os01g0886200 // Os02g0276900 // Os04g0493100 // Os01g0922800
7	GO:0019222	P	regulation of metabolic process	18	114	1664	24075	0.00087	0.011	// Os08g0531700 // Os07g0583600 // Os03g0764600 // Os12g0207000 // Os02g0729700 // Os09g0507200 // Os09g0306400 // Os03g0843100 // Os02g0132500 // Os03g0815100 // Os01g0142500 // Os08g0428400 // Os03g0388500 // Os02g0822400 // Os01g0886200 // Os02g0276900 // Os04g0493100 // Os01g0922800
7	GO:0019538	P	protein metabolic process	9	114	4333	24075	1	1	// Os02g0149800 // Os04g0691100 // Os07g0194100 // Os02g0121300 // Os01g0935400 // Os04g0584600 // Os01g0709500 // Os06g0118700 // Os12g0576100
7	GO:0031323	P	regulation of cellular metabolic process	18	114	1593	24075	0.00053	0.0083	// Os08g0531700 // Os07g0583600 // Os03g0764600 // Os12g0207000 // Os02g0729700 // Os09g0507200 // Os09g0306400 // Os03g0843100 // Os02g0132500 // Os03g0815100 // Os01g0142500 // Os08g0428400 // Os03g0388500 // Os02g0822400 // Os01g0886200 // Os02g0276900 // Os04g0493100 // Os01g0922800
7	GO:0031326	P	regulation of cellular biosynthetic process	18	114	1564	24075	0.00043	0.0078	// Os08g0531700 // Os07g0583600 // Os03g0764600 // Os12g0207000 // Os02g0729700 // Os09g0507200 // Os09g0306400 // Os03g0843100 // Os02g0132500 // Os03g0815100 // Os01g0142500 // Os08g0428400 // Os03g0388500 // Os02g0822400 // Os01g0886200 // Os02g0276900 // Os04g0493100 // Os01g0922800
7	GO:0032774	P	RNA biosynthetic process	12	114	788	24075	0.0004	0.0078	// Os08g0531700 // Os07g0583600 // Os01g0922800 // Os02g0132500 // Os02g0729700 // Os09g0507200 // Os09g0306400 // Os03g0843100 // Os12g0207000 // Os03g0388500 // Os08g0428400 // Os01g0886200
7	GO:0034645	P	cellular macromolecule biosynthetic process	18	114	5248	24075	0.96	1	// Os08g0531700 // Os07g0583600 // Os03g0764600 // Os12g0207000 // Os02g0729700 // Os09g0507200 // Os09g0306400 // Os03g0843100 // Os02g0132500 // Os03g0815100 // Os01g0142500 // Os08g0428400 // Os03g0388500 // Os02g0822400 // Os01g0886200 // Os02g0276900 // Os04g0493100 // Os01g0922800
7	GO:0042221	P	response to chemical stimulus	6	114	301	24075	0.0034	0.034	// Os03g0353400 // Os04g0691100 // Os01g0739500 // Os03g0121200 // Os08g0428400 // Os07g0661400
7	GO:0043170	P	macromolecule metabolic process	30	114	10433	24075	1	1	// Os01g0935400 // Os04g0584600 // Os04g0461600 // Os01g0709500 // Os06g0118700 // Os08g0428400 // Os01g0886200 // Os02g0276900 // Os01g0142500 // Os08g0531700 // Os07g0583600 // Os02g0696500 // Os02g0132500 // Os02g0729700 // Os09g0306400 // Os02g0121300 // Os03g0843100 // Os02g0822400 // Os01g0922800 // Os12g0207000 // Os03g0388500 // Os01g0679900 // Os03g0764600 // Os09g0507200 // Os02g0149800…
7	GO:0043412	P	macromolecule modification	6	114	1979	24075	0.91	1	// Os02g0149800 // Os04g0691100 // Os07g0194100 // Os04g0584600 // Os01g0709500 // Os01g0679900
7	GO:0043687	P	post-translational protein modification	5	114	1815	24075	0.94	1	// Os02g0149800 // Os04g0584600 // Os07g0194100 // Os04g0691100 // Os01g0709500
7	GO:0044237	P	cellular metabolic process	34	114	10696	24075	1	1	// Os01g0757200 // Os02g0735200 // Os04g0584600 // Os04g0461600 // Os01g0709500 // Os08g0428400 // Os01g0886200 // Os02g0276900 // Os01g0142500 // Os08g0531700 // Os07g0583600 // Os02g0696500 // Os02g0132500 // Os02g0729700 // Os09g0424300 // Os09g0306400 // Os03g0224300 // Os02g0121300 // Os03g0701800 // Os03g0843100 // Os02g0822400 // Os01g0922800 // Os07g0209100 // Os12g0207000 // Os03g0388500…
7	GO:0044238	P	primary metabolic process	40	114	11969	24075	1	1	// Os01g0757200 // Os02g0735200 // Os01g0935400 // Os04g0584600 // Os04g0461600 // Os01g0709500 // Os06g0118700 // Os08g0428400 // Os01g0886200 // Os02g0276900 // Os01g0142500 // Os01g0922800 // Os08g0531700 // Os07g0583600 // Os02g0696500 // Os02g0132500 // Os02g0729700 // Os09g0424300 // Os09g0306400 // Os03g0224300 // Os02g0121300 // Os03g0701800 // Os03g0843100 // Os02g0822400 // Os05g0209600…
7	GO:0044249	P	cellular biosynthetic process	22	114	5890	24075	0.92	1	// Os02g0735200 // Os08g0428400 // Os01g0886200 // Os02g0276900 // Os01g0142500 // Os08g0531700 // Os07g0583600 // Os02g0132500 // Os02g0729700 // Os09g0424300 // Os09g0306400 // Os03g0224300 // Os03g0843100 // Os02g0822400 // Os01g0922800 // Os12g0207000 // Os03g0388500 // Os03g0764600 // Os09g0507200 // Os05g0518600 // Os04g0493100 // Os03g0815100
7	GO:0044260	P	cellular macromolecule metabolic process	27	114	9350	24075	1	1	// Os04g0584600 // Os04g0461600 // Os01g0709500 // Os08g0428400 // Os01g0886200 // Os02g0276900 // Os01g0142500 // Os08g0531700 // Os07g0583600 // Os02g0696500 // Os02g0132500 // Os02g0729700 // Os09g0306400 // Os02g0121300 // Os03g0843100 // Os02g0822400 // Os01g0922800 // Os12g0207000 // Os03g0388500 // Os01g0679900 // Os03g0764600 // Os09g0507200 // Os02g0149800 // Os07g0194100 // Os04g0691100…
7	GO:0044267	P	cellular protein metabolic process	6	114	2877	24075	1	1	// Os02g0149800 // Os04g0691100 // Os07g0194100 // Os02g0121300 // Os04g0584600 // Os01g0709500
7	GO:0045449	P	regulation of transcription	18	114	1513	24075	0.00029	0.0078	// Os08g0531700 // Os07g0583600 // Os03g0764600 // Os12g0207000 // Os02g0729700 // Os09g0507200 // Os09g0306400 // Os03g0843100 // Os02g0132500 // Os03g0815100 // Os01g0142500 // Os08g0428400 // Os03g0388500 // Os02g0822400 // Os01g0886200 // Os02g0276900 // Os04g0493100 // Os01g0922800
7	GO:0050789	P	regulation of biological process	19	114	2027	24075	0.0032	0.034	// Os08g0531700 // Os07g0583600 // Os03g0764600 // Os12g0207000 // Os02g0729700 // Os09g0507200 // Os09g0306400 // Os03g0843100 // Os04g0691100 // Os02g0132500 // Os03g0815100 // Os01g0142500 // Os08g0428400 // Os03g0388500 // Os02g0822400 // Os01g0886200 // Os02g0276900 // Os04g0493100 // Os01g0922800
7	GO:0050794	P	regulation of cellular process	19	114	1955	24075	0.0022	0.024	// Os08g0531700 // Os07g0583600 // Os03g0764600 // Os12g0207000 // Os02g0729700 // Os09g0507200 // Os09g0306400 // Os03g0843100 // Os04g0691100 // Os02g0132500 // Os03g0815100 // Os01g0142500 // Os08g0428400 // Os03g0388500 // Os02g0822400 // Os01g0886200 // Os02g0276900 // Os04g0493100 // Os01g0922800
7	GO:0050896	P	response to stimulus	12	114	1026	24075	0.0036	0.035	// Os02g0437200 // Os03g0353400 // Os01g0314800 // Os03g0750000 // Os03g0388500 // Os04g0691100 // Os01g0739500 // Os09g0486500 // Os03g0121200 // Os08g0428400 // Os07g0661400 // Os12g0284000
7	GO:0051171	P	regulation of nitrogen compound metabolic process	18	114	1520	24075	0.0003	0.0078	// Os08g0531700 // Os07g0583600 // Os03g0764600 // Os12g0207000 // Os02g0729700 // Os09g0507200 // Os09g0306400 // Os03g0843100 // Os02g0132500 // Os03g0815100 // Os01g0142500 // Os08g0428400 // Os03g0388500 // Os02g0822400 // Os01g0886200 // Os02g0276900 // Os04g0493100 // Os01g0922800
7	GO:0051179	P	localization	7	114	1651	24075	0.67	1	// Os03g0751600 // Os02g0437200 // Os03g0142800 // Os07g0448800 // Os03g0843100 // Os02g0666200 // Os03g0147400
7	GO:0051234	P	establishment of localization	7	114	1638	24075	0.66	1	// Os03g0751600 // Os02g0437200 // Os03g0142800 // Os07g0448800 // Os03g0843100 // Os02g0666200 // Os03g0147400
7	GO:0051252	P	regulation of RNA metabolic process	12	114	740	24075	0.00023	0.0078	// Os08g0531700 // Os07g0583600 // Os01g0922800 // Os02g0132500 // Os02g0729700 // Os09g0507200 // Os09g0306400 // Os03g0843100 // Os12g0207000 // Os03g0388500 // Os08g0428400 // Os01g0886200
7	GO:0060255	P	regulation of macromolecule metabolic process	18	114	1640	24075	0.00074	0.0096	// Os08g0531700 // Os07g0583600 // Os03g0764600 // Os12g0207000 // Os02g0729700 // Os09g0507200 // Os09g0306400 // Os03g0843100 // Os02g0132500 // Os03g0815100 // Os01g0142500 // Os08g0428400 // Os03g0388500 // Os02g0822400 // Os01g0886200 // Os02g0276900 // Os04g0493100 // Os01g0922800
7	GO:0065007	P	biological regulation	19	114	2125	24075	0.0053	0.049	// Os08g0531700 // Os07g0583600 // Os03g0764600 // Os12g0207000 // Os02g0729700 // Os09g0507200 // Os09g0306400 // Os03g0843100 // Os04g0691100 // Os02g0132500 // Os03g0815100 // Os01g0142500 // Os08g0428400 // Os03g0388500 // Os02g0822400 // Os01g0886200 // Os02g0276900 // Os04g0493100 // Os01g0922800
7	GO:0080090	P	regulation of primary metabolic process	18	114	1626	24075	0.00067	0.0094	// Os08g0531700 // Os07g0583600 // Os03g0764600 // Os12g0207000 // Os02g0729700 // Os09g0507200 // Os09g0306400 // Os03g0843100 // Os02g0132500 // Os03g0815100 // Os01g0142500 // Os08g0428400 // Os03g0388500 // Os02g0822400 // Os01g0886200 // Os02g0276900 // Os04g0493100 // Os01g0922800
7	GO:0000166	F	nucleotide binding	11	114	3874	24075	0.98	1	// Os03g0747900 // Os03g0802600 // Os05g0584600 // Os03g0142800 // Os04g0691100 // Os02g0735200 // Os07g0194100 // Os04g0584600 // Os01g0709500 // Os03g0843100 // Os03g0701800
7	GO:0001882	F	nucleoside binding	10	114	3257	24075	0.95	1	// Os03g0747900 // Os03g0802600 // Os05g0584600 // Os03g0142800 // Os04g0691100 // Os02g0735200 // Os07g0194100 // Os04g0584600 // Os01g0709500 // Os03g0701800
7	GO:0001883	F	purine nucleoside binding	10	114	3247	24075	0.95	1	// Os03g0747900 // Os03g0802600 // Os05g0584600 // Os03g0142800 // Os04g0691100 // Os02g0735200 // Os07g0194100 // Os04g0584600 // Os01g0709500 // Os03g0701800
7	GO:0003676	F	nucleic acid binding	20	114	8251	24075	1	1	// Os02g0631200 // Os08g0531700 // Os03g0764600 // Os02g0132500 // Os09g0551600 // Os02g0729700 // Os09g0507200 // Os09g0306400 // Os06g0118700 // Os03g0843100 // Os04g0461600 // Os12g0207000 // Os08g0157600 // Os09g0486500 // Os03g0388500 // Os02g0822400 // Os01g0886200 // Os03g0815100 // Os01g0142500 // Os01g0922800
7	GO:0003677	F	DNA binding	20	114	5059	24075	0.85	1	// Os02g0631200 // Os08g0531700 // Os03g0764600 // Os02g0132500 // Os09g0551600 // Os02g0729700 // Os09g0507200 // Os09g0306400 // Os06g0118700 // Os03g0843100 // Os04g0461600 // Os12g0207000 // Os08g0157600 // Os09g0486500 // Os03g0388500 // Os02g0822400 // Os01g0886200 // Os03g0815100 // Os01g0142500 // Os01g0922800
7	GO:0003700	F	transcription factor activity	8	114	651	24075	0.013	0.37	// Os08g0531700 // Os01g0922800 // Os02g0132500 // Os02g0729700 // Os09g0306400 // Os12g0207000 // Os09g0507200 // Os01g0886200
7	GO:0003824	F	catalytic activity	35	114	12724	24075	1	1	// Os03g0802600 // Os01g0757200 // Os04g0547900 // Os03g0142800 // Os02g0735200 // Os04g0476100 // Os03g0582000 // Os01g0764000 // Os04g0584600 // Os01g0709500 // Os06g0118700 // Os02g0703600 // Os03g0701800 // Os03g0203200 // Os03g0747900 // Os02g0696500 // Os09g0424300 // Os04g0413500 // Os03g0224300 // Os02g0121300 // Os03g0121200 // Os05g0209600 // Os11g0210300 // Os07g0209100 // Os07g0634400…
7	GO:0005488	F	binding	51	114	16823	24075	1	1	// Os03g0802600 // Os09g0551600 // Os03g0142800 // Os02g0735200 // Os04g0476100 // Os03g0582000 // Os01g0935400 // Os04g0584600 // Os04g0461600 // Os01g0709500 // Os08g0157600 // Os08g0135400 // Os08g0428400 // Os01g0886200 // Os12g0284000 // Os01g0142500 // Os05g0491100 // Os08g0531700 // Os03g0353400 // Os02g0132500 // Os08g0482700 // Os09g0306400 // Os02g0703600 // Os11g0210300 // Os06g0118700…
7	GO:0005509	F	calcium ion binding	6	114	316	24075	0.0043	0.24	// Os05g0491100 // Os10g0389000 // Os03g0743500 // Os03g0388500 // Os04g0584600 // Os03g0121200
7	GO:0005515	F	protein binding	14	114	2460	24075	0.28	1	// Os03g0747900 // Os08g0531700 // Os03g0353400 // Os02g0132500 // Os02g0437200 // Os09g0507200 // Os01g0971100 // Os09g0306400 // Os08g0135400 // Os12g0207000 // Os03g0388500 // Os08g0428400 // Os07g0661400 // Os02g0687500
7	GO:0005524	F	ATP binding	10	114	3085	24075	0.93	1	// Os03g0747900 // Os03g0802600 // Os05g0584600 // Os03g0142800 // Os04g0691100 // Os02g0735200 // Os07g0194100 // Os04g0584600 // Os01g0709500 // Os03g0701800
7	GO:0008270	F	zinc ion binding	5	114	3939	24075	1	1	// Os08g0135400 // Os11g0210300 // Os09g0486500 // Os01g0971100 // Os02g0687500
7	GO:0016301	F	kinase activity	5	114	1750	24075	0.92	1	// Os04g0584600 // Os07g0194100 // Os04g0691100 // Os03g0701800 // Os01g0709500
7	GO:0016491	F	oxidoreductase activity	6	114	1672	24075	0.81	1	// Os11g0210300 // Os01g0757200 // Os04g0476100 // Os01g0935400 // Os03g0121200 // Os02g0703600
7	GO:0016740	F	transferase activity	10	114	6190	24075	1	1	// Os02g0696500 // Os03g0582000 // Os07g0209100 // Os04g0691100 // Os07g0194100 // Os01g0764000 // Os04g0584600 // Os01g0709500 // Os01g0550300 // Os03g0701800
7	GO:0016772	F	transferase activity, transferring phosphorus-containing groups	6	114	4781	24075	1	1	// Os04g0691100 // Os01g0550300 // Os04g0584600 // Os01g0709500 // Os07g0194100 // Os03g0701800
7	GO:0016773	F	phosphotransferase activity, alcohol group as acceptor	5	114	1726	24075	0.92	1	// Os04g0584600 // Os07g0194100 // Os04g0691100 // Os03g0701800 // Os01g0709500
7	GO:0016787	F	hydrolase activity	15	114	4901	24075	0.98	1	// Os03g0747900 // Os03g0802600 // Os05g0209600 // Os05g0584600 // Os04g0547900 // Os02g0149800 // Os04g0413500 // Os01g0935400 // Os04g0691100 // Os03g0203200 // Os03g0142800 // Os06g0118700 // Os12g0576100 // Os06g0157000 // Os02g0696500
7	GO:0017076	F	purine nucleotide binding	11	114	3456	24075	0.95	1	// Os03g0747900 // Os03g0802600 // Os05g0584600 // Os03g0142800 // Os04g0691100 // Os02g0735200 // Os07g0194100 // Os04g0584600 // Os01g0709500 // Os03g0843100 // Os03g0701800
7	GO:0030528	F	transcription regulator activity	11	114	987	24075	0.0075	0.29	// Os08g0531700 // Os01g0922800 // Os02g0132500 // Os02g0729700 // Os09g0306400 // Os07g0685700 // Os12g0207000 // Os09g0507200 // Os01g0886200 // Os02g0276900 // Os04g0493100
7	GO:0030554	F	adenyl nucleotide binding	10	114	3247	24075	0.95	1	// Os03g0747900 // Os03g0802600 // Os05g0584600 // Os03g0142800 // Os04g0691100 // Os02g0735200 // Os07g0194100 // Os04g0584600 // Os01g0709500 // Os03g0701800
7	GO:0032553	F	ribonucleotide binding	11	114	3292	24075	0.92	1	// Os03g0747900 // Os03g0802600 // Os05g0584600 // Os03g0142800 // Os04g0691100 // Os02g0735200 // Os07g0194100 // Os04g0584600 // Os01g0709500 // Os03g0843100 // Os03g0701800
7	GO:0032555	F	purine ribonucleotide binding	11	114	3292	24075	0.92	1	// Os03g0747900 // Os03g0802600 // Os05g0584600 // Os03g0142800 // Os04g0691100 // Os02g0735200 // Os07g0194100 // Os04g0584600 // Os01g0709500 // Os03g0843100 // Os03g0701800
7	GO:0032559	F	adenyl ribonucleotide binding	10	114	3087	24075	0.93	1	// Os03g0747900 // Os03g0802600 // Os05g0584600 // Os03g0142800 // Os04g0691100 // Os02g0735200 // Os07g0194100 // Os04g0584600 // Os01g0709500 // Os03g0701800
7	GO:0043167	F	ion binding	18	114	5700	24075	0.98	1	// Os05g0491100 // Os05g0111300 // Os11g0210300 // Os10g0389000 // Os03g0743500 // Os02g0149800 // Os08g0482700 // Os01g0971100 // Os02g0703600 // Os03g0751600 // Os01g0935400 // Os04g0584600 // Os03g0121200 // Os09g0486500 // Os08g0135400 // Os04g0476100 // Os03g0388500 // Os02g0687500
7	GO:0043169	F	cation binding	18	114	5696	24075	0.98	1	// Os05g0491100 // Os05g0111300 // Os11g0210300 // Os10g0389000 // Os03g0743500 // Os02g0149800 // Os08g0482700 // Os01g0971100 // Os02g0703600 // Os03g0751600 // Os01g0935400 // Os04g0584600 // Os03g0121200 // Os09g0486500 // Os08g0135400 // Os04g0476100 // Os03g0388500 // Os02g0687500
7	GO:0043565	F	sequence-specific DNA binding	8	114	453	24075	0.0015	0.18	// Os08g0531700 // Os01g0922800 // Os02g0132500 // Os02g0729700 // Os09g0306400 // Os12g0207000 // Os09g0507200 // Os01g0886200
7	GO:0046872	F	metal ion binding	18	114	5476	24075	0.97	1	// Os05g0491100 // Os05g0111300 // Os11g0210300 // Os10g0389000 // Os03g0743500 // Os02g0149800 // Os08g0482700 // Os01g0971100 // Os02g0703600 // Os03g0751600 // Os01g0935400 // Os04g0584600 // Os03g0121200 // Os09g0486500 // Os08g0135400 // Os04g0476100 // Os03g0388500 // Os02g0687500
7	GO:0046914	F	transition metal ion binding	11	114	4875	24075	1	1	// Os11g0210300 // Os08g0135400 // Os02g0149800 // Os08g0482700 // Os01g0971100 // Os02g0703600 // Os01g0935400 // Os03g0121200 // Os09g0486500 // Os04g0476100 // Os02g0687500
7	GO:0005622	C	intracellular	74	114	4116	24075	1.6e-29	1e-28	// Os04g0527000 // Os03g0802600 // Os01g0739500 // Os09g0551600 // Os04g0547900 // Os01g0169800 // Os05g0230700 // Os03g0227800 // Os02g0735200 // Os01g0948600 // Os01g0764000 // Os08g0441500 // Os08g0157600 // Os08g0135400 // Os08g0428400 // Os01g0886200 // Os02g0276900 // Os12g0284000 // Os04g0685400 // Os01g0922800 // Os10g0555900 // Os03g0747900 // Os08g0531700 // Os07g0583600 // Os02g0696500…
7	GO:0005623	C	cell	83	114	5945	24075	7.3e-27	3.7e-26	// Os02g0666200 // Os05g0119100 // Os04g0527000 // Os03g0802600 // Os01g0739500 // Os09g0551600 // Os04g0547900 // Os03g0142800 // Os05g0230700 // Os03g0227800 // Os02g0735200 // Os01g0948600 // Os08g0529000 // Os08g0441500 // Os08g0157600 // Os08g0135400 // Os08g0428400 // Os01g0886200 // Os02g0276900 // Os12g0284000 // Os06g0157000 // Os04g0685400 // Os01g0922800 // Os10g0555900 // Os03g0747900…
7	GO:0005634	C	nucleus	21	114	1884	24075	0.00021	0.00093	// Os09g0551600 // Os01g0739500 // Os08g0531700 // Os07g0583600 // Os03g0764600 // Os12g0207000 // Os02g0729700 // Os09g0507200 // Os09g0306400 // Os07g0685700 // Os02g0132500 // Os01g0142500 // Os08g0157600 // Os08g0428400 // Os03g0388500 // Os01g0182600 // Os01g0886200 // Os02g0276900 // Os12g0284000 // Os04g0493100 // Os01g0922800
7	GO:0005737	C	cytoplasm	58	114	1263	24075	1.4e-42	2.6e-41	// Os04g0527000 // Os03g0802600 // Os09g0551600 // Os04g0547900 // Os05g0230700 // Os03g0227800 // Os02g0735200 // Os01g0948600 // Os01g0764000 // Os08g0441500 // Os08g0135400 // Os02g0276900 // Os12g0284000 // Os04g0685400 // Os01g0922800 // Os10g0555900 // Os01g0169800 // Os02g0696500 // Os02g0132500 // Os08g0482700 // Os09g0306400 // Os03g0224300 // Os06g0118700 // Os03g0701800 // Os03g0203200…
7	GO:0005739	C	mitochondrion	16	114	162	24075	2.6e-16	1.2e-15	// Os03g0583900 // Os08g0503000 // Os07g0621500 // Os03g0762500 // Os02g0149800 // Os06g0194900 // Os05g0366900 // Os03g0224300 // Os08g0135400 // Os08g0441500 // Os03g0121200 // Os02g0822400 // Os01g0717000 // Os01g0314800 // Os03g0227800 // Os01g0922800
7	GO:0009536	C	plastid	18	114	37	24075	4e-29	2.4e-28	// Os02g0437200 // Os08g0535200 // Os04g0527000 // Os03g0203200 // Os02g0132500 // Os09g0551600 // Os04g0547900 // Os05g0230700 // Os09g0306400 // Os01g0948600 // Os04g0526800 // Os02g0661100 // Os06g0624900 // Os01g0709500 // Os02g0276900 // Os01g0778800 // Os08g0409100 // Os08g0268000
7	GO:0016020	C	membrane	15	114	2115	24075	0.075	0.29	// Os10g0555900 // Os02g0437200 // Os05g0119100 // Os02g0689900 // Os02g0149800 // Os08g0462900 // Os08g0535200 // Os02g0703600 // Os07g0448800 // Os08g0529000 // Os02g0247000 // Os03g0142800 // Os02g0666200 // Os03g0147400 // Os02g0216300
7	GO:0016021	C	integral to membrane	8	114	752	24075	0.027	0.12	// Os08g0535200 // Os03g0142800 // Os02g0703600 // Os07g0448800 // Os08g0529000 // Os02g0149800 // Os02g0666200 // Os03g0147400
7	GO:0016023	C	cytoplasmic membrane-bounded vesicle	20	114	26	24075	2.6e-35	2.4e-34	// Os10g0555900 // Os03g0243100 // Os03g0802600 // Os05g0209600 // Os03g0760800 // Os10g0556100 // Os08g0482700 // Os02g0703600 // Os01g0169800 // Os01g0764000 // Os04g0413500 // Os11g0121300 // Os03g0701800 // Os06g0118700 // Os06g0157000 // Os05g0495300 // Os03g0147400 // Os03g0212300 // Os04g0685400 // Os02g0696500
7	GO:0031224	C	intrinsic to membrane	8	114	775	24075	0.032	0.13	// Os08g0535200 // Os03g0142800 // Os02g0703600 // Os07g0448800 // Os08g0529000 // Os02g0149800 // Os02g0666200 // Os03g0147400
7	GO:0031410	C	cytoplasmic vesicle	20	114	34	24075	1.4e-33	9.9e-33	// Os10g0555900 // Os03g0243100 // Os03g0802600 // Os05g0209600 // Os03g0760800 // Os10g0556100 // Os08g0482700 // Os02g0703600 // Os01g0169800 // Os01g0764000 // Os04g0413500 // Os11g0121300 // Os03g0701800 // Os06g0118700 // Os06g0157000 // Os05g0495300 // Os03g0147400 // Os03g0212300 // Os04g0685400 // Os02g0696500
7	GO:0031982	C	vesicle	20	114	34	24075	1.4e-33	9.9e-33	// Os10g0555900 // Os03g0243100 // Os03g0802600 // Os05g0209600 // Os03g0760800 // Os10g0556100 // Os08g0482700 // Os02g0703600 // Os01g0169800 // Os01g0764000 // Os04g0413500 // Os11g0121300 // Os03g0701800 // Os06g0118700 // Os06g0157000 // Os05g0495300 // Os03g0147400 // Os03g0212300 // Os04g0685400 // Os02g0696500
7	GO:0031988	C	membrane-bounded vesicle	20	114	26	24075	2.6e-35	2.4e-34	// Os10g0555900 // Os03g0243100 // Os03g0802600 // Os05g0209600 // Os03g0760800 // Os10g0556100 // Os08g0482700 // Os02g0703600 // Os01g0169800 // Os01g0764000 // Os04g0413500 // Os11g0121300 // Os03g0701800 // Os06g0118700 // Os06g0157000 // Os05g0495300 // Os03g0147400 // Os03g0212300 // Os04g0685400 // Os02g0696500
7	GO:0043226	C	organelle	72	114	2859	24075	7.4e-38	9.5e-37	// Os04g0527000 // Os03g0802600 // Os01g0739500 // Os09g0551600 // Os04g0547900 // Os01g0169800 // Os05g0230700 // Os03g0227800 // Os01g0948600 // Os01g0764000 // Os08g0441500 // Os08g0157600 // Os08g0135400 // Os08g0428400 // Os01g0886200 // Os02g0276900 // Os12g0284000 // Os04g0685400 // Os01g0922800 // Os10g0555900 // Os03g0747900 // Os08g0531700 // Os07g0583600 // Os02g0696500 // Os03g0701800…
7	GO:0043227	C	membrane-bounded organelle	71	114	2319	24075	1.1e-42	2.6e-41	// Os04g0527000 // Os03g0802600 // Os01g0739500 // Os09g0551600 // Os04g0547900 // Os05g0230700 // Os03g0227800 // Os01g0948600 // Os01g0764000 // Os08g0441500 // Os08g0157600 // Os08g0135400 // Os08g0428400 // Os01g0886200 // Os02g0276900 // Os12g0284000 // Os04g0685400 // Os01g0922800 // Os10g0555900 // Os01g0169800 // Os08g0531700 // Os07g0583600 // Os02g0696500 // Os03g0701800 // Os08g0482700…
7	GO:0043229	C	intracellular organelle	72	114	2859	24075	7.4e-38	9.5e-37	// Os04g0527000 // Os03g0802600 // Os01g0739500 // Os09g0551600 // Os04g0547900 // Os01g0169800 // Os05g0230700 // Os03g0227800 // Os01g0948600 // Os01g0764000 // Os08g0441500 // Os08g0157600 // Os08g0135400 // Os08g0428400 // Os01g0886200 // Os02g0276900 // Os12g0284000 // Os04g0685400 // Os01g0922800 // Os10g0555900 // Os03g0747900 // Os08g0531700 // Os07g0583600 // Os02g0696500 // Os03g0701800…
7	GO:0043231	C	intracellular membrane-bounded organelle	71	114	2296	24075	5.9e-43	2.2e-41	// Os04g0527000 // Os03g0802600 // Os01g0739500 // Os09g0551600 // Os04g0547900 // Os05g0230700 // Os03g0227800 // Os01g0948600 // Os01g0764000 // Os08g0441500 // Os08g0157600 // Os08g0135400 // Os08g0428400 // Os01g0886200 // Os02g0276900 // Os12g0284000 // Os04g0685400 // Os01g0922800 // Os10g0555900 // Os01g0169800 // Os08g0531700 // Os07g0583600 // Os02g0696500 // Os03g0701800 // Os08g0482700…
7	GO:0044424	C	intracellular part	74	114	3529	24075	6.2e-34	5.3e-33	// Os04g0527000 // Os03g0802600 // Os01g0739500 // Os09g0551600 // Os04g0547900 // Os01g0169800 // Os05g0230700 // Os03g0227800 // Os02g0735200 // Os01g0948600 // Os01g0764000 // Os08g0441500 // Os08g0157600 // Os08g0135400 // Os08g0428400 // Os01g0886200 // Os02g0276900 // Os12g0284000 // Os04g0685400 // Os01g0922800 // Os10g0555900 // Os03g0747900 // Os08g0531700 // Os07g0583600 // Os02g0696500…
7	GO:0044425	C	membrane part	8	114	1007	24075	0.11	0.39	// Os08g0535200 // Os03g0142800 // Os02g0703600 // Os07g0448800 // Os08g0529000 // Os02g0149800 // Os02g0666200 // Os03g0147400
7	GO:0044444	C	cytoplasmic part	57	114	966	24075	1.7e-47	1.3e-45	// Os04g0527000 // Os03g0802600 // Os09g0551600 // Os04g0547900 // Os05g0230700 // Os03g0227800 // Os01g0948600 // Os01g0764000 // Os08g0441500 // Os08g0135400 // Os02g0276900 // Os12g0284000 // Os04g0685400 // Os01g0922800 // Os10g0555900 // Os01g0169800 // Os02g0696500 // Os02g0132500 // Os08g0482700 // Os09g0306400 // Os03g0224300 // Os06g0118700 // Os03g0701800 // Os03g0203200 // Os03g0121200…
7	GO:0044464	C	cell part	83	114	5945	24075	7.3e-27	3.7e-26	// Os02g0666200 // Os05g0119100 // Os04g0527000 // Os03g0802600 // Os01g0739500 // Os09g0551600 // Os04g0547900 // Os03g0142800 // Os05g0230700 // Os03g0227800 // Os02g0735200 // Os01g0948600 // Os08g0529000 // Os08g0441500 // Os08g0157600 // Os08g0135400 // Os08g0428400 // Os01g0886200 // Os02g0276900 // Os12g0284000 // Os06g0157000 // Os04g0685400 // Os01g0922800 // Os10g0555900 // Os03g0747900…
8	GO:0000003	P	reproduction	5	134	133	24075	0.001	0.1	// Os01g0201700 // Os05g0203800 // Os10g0556100 // Os09g0507200 // Os01g0182600
8	GO:0005975	P	carbohydrate metabolic process	7	134	833	24075	0.18	1	// Os03g0719300 // Os01g0580200 // Os03g0255100 // Os07g0208500 // Os01g0300200 // Os06g0573600 // Os03g0599800
8	GO:0006082	P	organic acid metabolic process	7	134	474	24075	0.018	0.52	// Os02g0626100 // Os01g0188400 // Os03g0685300 // Os03g0220100 // Os10g0363300 // Os01g0681900 // Os02g0626400
8	GO:0006139	P	nucleobase, nucleoside, nucleotide and nucleic acid metabolic process	18	134	6695	24075	1	1	// Os09g0501600 // Os01g0201700 // Os07g0693500 // Os09g0423800 // Os05g0349200 // Os02g0575200 // Os05g0203800 // Os06g0700700 // Os03g0231800 // Os01g0889200 // Os12g0102300 // Os04g0460600 // Os06g0604000 // Os03g0327800 // Os09g0507200 // Os03g0689300 // Os05g0562400 // Os02g0170300
8	GO:0006350	P	transcription	12	134	1629	24075	0.2	1	// Os09g0501600 // Os01g0201700 // Os09g0423800 // Os09g0507200 // Os05g0203800 // Os01g0889200 // Os12g0102300 // Os04g0460600 // Os06g0604000 // Os03g0327800 // Os05g0562400 // Os02g0170300
8	GO:0006351	P	transcription, DNA-dependent	9	134	786	24075	0.033	0.72	// Os01g0201700 // Os09g0423800 // Os09g0507200 // Os05g0203800 // Os01g0889200 // Os12g0102300 // Os06g0604000 // Os05g0562400 // Os02g0170300
8	GO:0006355	P	regulation of transcription, DNA-dependent	8	134	737	24075	0.055	1	// Os01g0201700 // Os09g0423800 // Os09g0507200 // Os05g0203800 // Os12g0102300 // Os06g0604000 // Os05g0562400 // Os02g0170300
8	GO:0006464	P	protein modification process	5	134	1929	24075	0.98	1	// Os04g0691100 // Os04g0689500 // Os01g0709500 // Os06g0496800 // Os04g0616400
8	GO:0006468	P	protein amino acid phosphorylation	5	134	1570	24075	0.94	1	// Os04g0691100 // Os04g0689500 // Os01g0709500 // Os06g0496800 // Os04g0616400
8	GO:0006508	P	proteolysis	6	134	1579	24075	0.88	1	// Os01g0140100 // Os02g0469600 // Os12g0102300 // Os08g0478500 // Os01g0598600 // Os01g0560000
8	GO:0006629	P	lipid metabolic process	10	134	528	24075	0.00084	0.1	// Os06g0156600 // Os12g0566700 // Os06g0148200 // Os03g0220100 // Os06g0156700 // Os07g0481200 // Os09g0132900 // Os01g0728100 // Os10g0363300 // Os06g0157000
8	GO:0006753	P	nucleoside phosphate metabolic process	5	134	218	24075	0.0081	0.41	// Os02g0575200 // Os06g0700700 // Os03g0689300 // Os07g0693500 // Os05g0349200
8	GO:0006793	P	phosphorus metabolic process	5	134	1795	24075	0.97	1	// Os04g0691100 // Os04g0689500 // Os01g0709500 // Os06g0496800 // Os04g0616400
8	GO:0006796	P	phosphate metabolic process	5	134	1795	24075	0.97	1	// Os04g0691100 // Os04g0689500 // Os01g0709500 // Os06g0496800 // Os04g0616400
8	GO:0006807	P	nitrogen compound metabolic process	22	134	7073	24075	1	1	// Os03g0685300 // Os06g0604000 // Os02g0626400 // Os01g0681900 // Os09g0501600 // Os07g0693500 // Os09g0423800 // Os05g0349200 // Os02g0575200 // Os05g0203800 // Os01g0889200 // Os12g0102300 // Os03g0327800 // Os02g0170300 // Os01g0201700 // Os04g0460600 // Os03g0689300 // Os05g0562400 // Os09g0507200 // Os02g0626100 // Os03g0231800 // Os06g0700700
8	GO:0006810	P	transport	11	134	1638	24075	0.31	1	// Os07g0448800 // Os02g0232900 // Os06g0581000 // Os03g0142800 // Os03g0687000 // Os02g0693700 // Os03g0808500 // Os06g0700700 // Os12g0114800 // Os11g0115100 // Os03g0689300
8	GO:0006950	P	response to stress	6	134	873	24075	0.36	1	// Os04g0465600 // Os07g0694700 // Os05g0135700 // Os04g0691100 // Os11g0210100 // Os07g0661400
8	GO:0008152	P	metabolic process	61	134	14398	24075	1	1	// Os01g0140100 // Os06g0156600 // Os06g0496800 // Os03g0685300 // Os06g0157000 // Os03g0220100 // Os06g0604000 // Os01g0709500 // Os01g0889200 // Os01g0560000 // Os01g0728100 // Os09g0132900 // Os02g0626400 // Os01g0681900 // Os04g0460600 // Os09g0501600 // Os12g0102300 // Os07g0693500 // Os04g0616400 // Os05g0349200 // Os12g0264500 // Os02g0575200 // Os05g0203800 // Os09g0423800 // Os12g0566700…
8	GO:0009056	P	catabolic process	5	134	433	24075	0.097	1	// Os02g0244700 // Os07g0694700 // Os02g0626400 // Os08g0478500 // Os02g0626100
8	GO:0009058	P	biosynthetic process	24	134	6085	24075	0.98	1	// Os03g0220100 // Os06g0604000 // Os02g0626400 // Os01g0681900 // Os04g0460600 // Os09g0501600 // Os07g0693500 // Os09g0423800 // Os05g0349200 // Os02g0575200 // Os05g0203800 // Os01g0889200 // Os12g0102300 // Os03g0327800 // Os02g0170300 // Os01g0201700 // Os07g0208500 // Os10g0363300 // Os03g0689300 // Os05g0562400 // Os09g0507200 // Os02g0626100 // Os06g0700700 // Os03g0599800
8	GO:0009059	P	macromolecule biosynthetic process	14	134	5252	24075	1	1	// Os09g0501600 // Os01g0201700 // Os06g0604000 // Os09g0423800 // Os09g0507200 // Os05g0203800 // Os05g0562400 // Os12g0102300 // Os04g0460600 // Os07g0208500 // Os03g0327800 // Os01g0889200 // Os03g0599800 // Os02g0170300
8	GO:0009117	P	nucleotide metabolic process	5	134	218	24075	0.0081	0.41	// Os02g0575200 // Os06g0700700 // Os03g0689300 // Os07g0693500 // Os05g0349200
8	GO:0009628	P	response to abiotic stimulus	5	134	74	24075	7.8e-05	0.024	// Os04g0691100 // Os08g0430700 // Os12g0284000 // Os07g0661400 // Os05g0135700
8	GO:0009889	P	regulation of biosynthetic process	11	134	1564	24075	0.26	1	// Os09g0501600 // Os01g0201700 // Os09g0423800 // Os09g0507200 // Os05g0203800 // Os12g0102300 // Os04g0460600 // Os06g0604000 // Os03g0327800 // Os05g0562400 // Os02g0170300
8	GO:0009987	P	cellular process	46	134	12839	24075	1	1	// Os10g0510500 // Os06g0496800 // Os01g0937400 // Os03g0685300 // Os03g0220100 // Os06g0604000 // Os01g0709500 // Os01g0889200 // Os09g0423800 // Os02g0626400 // Os01g0681900 // Os04g0460600 // Os09g0501600 // Os07g0693500 // Os04g0616400 // Os05g0349200 // Os02g0575200 // Os05g0203800 // Os06g0671900 // Os03g0719300 // Os12g0102300 // Os01g0300200 // Os03g0327800 // Os03g0758500 // Os01g0182600…
8	GO:0010467	P	gene expression	13	134	2424	24075	0.6	1	// Os09g0501600 // Os01g0201700 // Os09g0423800 // Os09g0507200 // Os05g0203800 // Os03g0231800 // Os01g0889200 // Os12g0102300 // Os04g0460600 // Os06g0604000 // Os03g0327800 // Os05g0562400 // Os02g0170300
8	GO:0010468	P	regulation of gene expression	11	134	1577	24075	0.26	1	// Os09g0501600 // Os01g0201700 // Os09g0423800 // Os09g0507200 // Os05g0203800 // Os12g0102300 // Os04g0460600 // Os06g0604000 // Os03g0327800 // Os05g0562400 // Os02g0170300
8	GO:0010556	P	regulation of macromolecule biosynthetic process	11	134	1564	24075	0.26	1	// Os09g0501600 // Os01g0201700 // Os09g0423800 // Os09g0507200 // Os05g0203800 // Os12g0102300 // Os04g0460600 // Os06g0604000 // Os03g0327800 // Os05g0562400 // Os02g0170300
8	GO:0016070	P	RNA metabolic process	10	134	1088	24075	0.084	1	// Os01g0201700 // Os09g0423800 // Os09g0507200 // Os05g0203800 // Os03g0231800 // Os01g0889200 // Os12g0102300 // Os06g0604000 // Os05g0562400 // Os02g0170300
8	GO:0016310	P	phosphorylation	5	134	1695	24075	0.96	1	// Os04g0691100 // Os04g0689500 // Os01g0709500 // Os06g0496800 // Os04g0616400
8	GO:0019219	P	regulation of nucleobase, nucleoside, nucleotide and nucleic acid metabolic process	11	134	1520	24075	0.23	1	// Os09g0501600 // Os01g0201700 // Os09g0423800 // Os09g0507200 // Os05g0203800 // Os12g0102300 // Os04g0460600 // Os06g0604000 // Os03g0327800 // Os05g0562400 // Os02g0170300
8	GO:0019222	P	regulation of metabolic process	11	134	1664	24075	0.32	1	// Os09g0501600 // Os01g0201700 // Os09g0423800 // Os09g0507200 // Os05g0203800 // Os12g0102300 // Os04g0460600 // Os06g0604000 // Os03g0327800 // Os05g0562400 // Os02g0170300
8	GO:0019538	P	protein metabolic process	11	134	4333	24075	1	1	// Os01g0140100 // Os02g0469600 // Os04g0616400 // Os06g0496800 // Os04g0689500 // Os12g0102300 // Os04g0691100 // Os01g0709500 // Os01g0598600 // Os01g0560000 // Os08g0478500
8	GO:0019752	P	carboxylic acid metabolic process	7	134	473	24075	0.018	0.52	// Os02g0626100 // Os01g0188400 // Os03g0685300 // Os03g0220100 // Os10g0363300 // Os01g0681900 // Os02g0626400
8	GO:0031323	P	regulation of cellular metabolic process	11	134	1593	24075	0.27	1	// Os09g0501600 // Os01g0201700 // Os09g0423800 // Os09g0507200 // Os05g0203800 // Os12g0102300 // Os04g0460600 // Os06g0604000 // Os03g0327800 // Os05g0562400 // Os02g0170300
8	GO:0031326	P	regulation of cellular biosynthetic process	11	134	1564	24075	0.26	1	// Os09g0501600 // Os01g0201700 // Os09g0423800 // Os09g0507200 // Os05g0203800 // Os12g0102300 // Os04g0460600 // Os06g0604000 // Os03g0327800 // Os05g0562400 // Os02g0170300
8	GO:0032774	P	RNA biosynthetic process	9	134	788	24075	0.033	0.72	// Os01g0201700 // Os09g0423800 // Os09g0507200 // Os05g0203800 // Os01g0889200 // Os12g0102300 // Os06g0604000 // Os05g0562400 // Os02g0170300
8	GO:0034645	P	cellular macromolecule biosynthetic process	14	134	5248	24075	1	1	// Os09g0501600 // Os01g0201700 // Os06g0604000 // Os09g0423800 // Os09g0507200 // Os05g0203800 // Os05g0562400 // Os12g0102300 // Os04g0460600 // Os07g0208500 // Os03g0327800 // Os01g0889200 // Os03g0599800 // Os02g0170300
8	GO:0042180	P	cellular ketone metabolic process	7	134	480	24075	0.019	0.52	// Os02g0626100 // Os01g0188400 // Os03g0685300 // Os03g0220100 // Os10g0363300 // Os01g0681900 // Os02g0626400
8	GO:0042221	P	response to chemical stimulus	5	134	301	24075	0.028	0.71	// Os07g0694700 // Os04g0691100 // Os11g0210100 // Os10g0510500 // Os07g0661400
8	GO:0043170	P	macromolecule metabolic process	25	134	10433	24075	1	1	// Os01g0140100 // Os04g0616400 // Os06g0604000 // Os01g0709500 // Os01g0560000 // Os09g0501600 // Os06g0496800 // Os05g0203800 // Os01g0889200 // Os12g0102300 // Os03g0327800 // Os02g0170300 // Os02g0469600 // Os04g0689500 // Os01g0201700 // Os07g0208500 // Os08g0478500 // Os01g0598600 // Os05g0562400 // Os09g0423800 // Os09g0507200 // Os03g0231800 // Os04g0691100 // Os04g0460600 // Os03g0599800
8	GO:0043412	P	macromolecule modification	5	134	1979	24075	0.99	1	// Os04g0691100 // Os04g0689500 // Os01g0709500 // Os06g0496800 // Os04g0616400
8	GO:0043436	P	oxoacid metabolic process	7	134	473	24075	0.018	0.52	// Os02g0626100 // Os01g0188400 // Os03g0685300 // Os03g0220100 // Os10g0363300 // Os01g0681900 // Os02g0626400
8	GO:0043687	P	post-translational protein modification	5	134	1815	24075	0.98	1	// Os04g0691100 // Os04g0689500 // Os01g0709500 // Os06g0496800 // Os04g0616400
8	GO:0044237	P	cellular metabolic process	39	134	10696	24075	1	1	// Os04g0616400 // Os03g0685300 // Os03g0220100 // Os06g0604000 // Os01g0709500 // Os01g0889200 // Os02g0626400 // Os01g0681900 // Os04g0460600 // Os09g0501600 // Os07g0693500 // Os06g0496800 // Os05g0349200 // Os02g0575200 // Os05g0203800 // Os03g0719300 // Os12g0102300 // Os01g0300200 // Os03g0327800 // Os03g0758500 // Os02g0170300 // Os02g0244700 // Os01g0188400 // Os04g0689500 // Os05g0135700…
8	GO:0044238	P	primary metabolic process	49	134	11969	24075	1	1	// Os01g0140100 // Os06g0496800 // Os03g0685300 // Os06g0157000 // Os03g0220100 // Os06g0604000 // Os01g0709500 // Os01g0560000 // Os01g0728100 // Os09g0132900 // Os02g0626400 // Os01g0681900 // Os04g0460600 // Os09g0501600 // Os12g0102300 // Os07g0693500 // Os04g0616400 // Os05g0349200 // Os02g0575200 // Os05g0203800 // Os06g0156600 // Os12g0566700 // Os01g0889200 // Os06g0148200 // Os06g0156700…
8	GO:0044248	P	cellular catabolic process	5	134	337	24075	0.042	0.85	// Os02g0244700 // Os07g0694700 // Os02g0626400 // Os08g0478500 // Os02g0626100
8	GO:0044249	P	cellular biosynthetic process	22	134	5890	24075	0.99	1	// Os03g0220100 // Os06g0604000 // Os01g0681900 // Os09g0501600 // Os07g0693500 // Os09g0423800 // Os05g0349200 // Os02g0575200 // Os05g0203800 // Os01g0889200 // Os12g0102300 // Os03g0327800 // Os02g0170300 // Os01g0201700 // Os04g0460600 // Os10g0363300 // Os03g0689300 // Os05g0562400 // Os07g0208500 // Os09g0507200 // Os06g0700700 // Os03g0599800
8	GO:0044260	P	cellular macromolecule metabolic process	21	134	9350	24075	1	1	// Os09g0501600 // Os01g0201700 // Os06g0604000 // Os04g0616400 // Os06g0496800 // Os05g0203800 // Os04g0689500 // Os04g0460600 // Os03g0231800 // Os05g0562400 // Os12g0102300 // Os04g0691100 // Os07g0208500 // Os01g0709500 // Os03g0327800 // Os09g0507200 // Os08g0478500 // Os01g0889200 // Os03g0599800 // Os02g0170300 // Os09g0423800
8	GO:0044267	P	cellular protein metabolic process	6	134	2877	24075	1	1	// Os04g0616400 // Os06g0496800 // Os04g0689500 // Os04g0691100 // Os08g0478500 // Os01g0709500
8	GO:0044281	P	small molecule metabolic process	14	134	1034	24075	0.002	0.15	// Os03g0719300 // Os07g0693500 // Os05g0349200 // Os02g0626100 // Os02g0575200 // Os01g0188400 // Os03g0685300 // Os03g0220100 // Os06g0700700 // Os05g0135700 // Os10g0363300 // Os03g0689300 // Os02g0626400 // Os01g0681900
8	GO:0045449	P	regulation of transcription	11	134	1513	24075	0.22	1	// Os09g0501600 // Os01g0201700 // Os09g0423800 // Os09g0507200 // Os05g0203800 // Os12g0102300 // Os04g0460600 // Os06g0604000 // Os03g0327800 // Os05g0562400 // Os02g0170300
8	GO:0050789	P	regulation of biological process	14	134	2027	24075	0.24	1	// Os09g0501600 // Os01g0201700 // Os10g0510500 // Os09g0423800 // Os09g0507200 // Os05g0203800 // Os12g0102300 // Os04g0691100 // Os06g0604000 // Os03g0327800 // Os04g0460600 // Os05g0562400 // Os02g0170300 // Os02g0469300
8	GO:0050794	P	regulation of cellular process	14	134	1955	24075	0.2	1	// Os09g0501600 // Os01g0201700 // Os10g0510500 // Os09g0423800 // Os09g0507200 // Os05g0203800 // Os12g0102300 // Os04g0691100 // Os06g0604000 // Os03g0327800 // Os04g0460600 // Os05g0562400 // Os02g0170300 // Os02g0469300
8	GO:0050896	P	response to stimulus	9	134	1026	24075	0.12	1	// Os04g0465600 // Os10g0510500 // Os07g0694700 // Os05g0135700 // Os04g0691100 // Os11g0210100 // Os07g0661400 // Os08g0430700 // Os12g0284000
8	GO:0051171	P	regulation of nitrogen compound metabolic process	11	134	1520	24075	0.23	1	// Os09g0501600 // Os01g0201700 // Os09g0423800 // Os09g0507200 // Os05g0203800 // Os12g0102300 // Os04g0460600 // Os06g0604000 // Os03g0327800 // Os05g0562400 // Os02g0170300
8	GO:0051179	P	localization	11	134	1651	24075	0.31	1	// Os07g0448800 // Os02g0232900 // Os06g0581000 // Os03g0142800 // Os03g0687000 // Os02g0693700 // Os03g0808500 // Os06g0700700 // Os12g0114800 // Os11g0115100 // Os03g0689300
8	GO:0051234	P	establishment of localization	11	134	1638	24075	0.31	1	// Os07g0448800 // Os02g0232900 // Os06g0581000 // Os03g0142800 // Os03g0687000 // Os02g0693700 // Os03g0808500 // Os06g0700700 // Os12g0114800 // Os11g0115100 // Os03g0689300
8	GO:0051252	P	regulation of RNA metabolic process	8	134	740	24075	0.056	1	// Os01g0201700 // Os09g0423800 // Os09g0507200 // Os05g0203800 // Os12g0102300 // Os06g0604000 // Os05g0562400 // Os02g0170300
8	GO:0055086	P	nucleobase, nucleoside and nucleotide metabolic process	5	134	244	24075	0.013	0.52	// Os02g0575200 // Os06g0700700 // Os03g0689300 // Os07g0693500 // Os05g0349200
8	GO:0055114	P	oxidation reduction	6	134	1351	24075	0.77	1	// Os07g0694700 // Os01g0188400 // Os03g0231800 // Os11g0210100 // Os03g0758500 // Os01g0681900
8	GO:0060255	P	regulation of macromolecule metabolic process	11	134	1640	24075	0.31	1	// Os09g0501600 // Os01g0201700 // Os09g0423800 // Os09g0507200 // Os05g0203800 // Os12g0102300 // Os04g0460600 // Os06g0604000 // Os03g0327800 // Os05g0562400 // Os02g0170300
8	GO:0065007	P	biological regulation	14	134	2125	24075	0.3	1	// Os09g0501600 // Os01g0201700 // Os10g0510500 // Os09g0423800 // Os09g0507200 // Os05g0203800 // Os12g0102300 // Os04g0691100 // Os06g0604000 // Os03g0327800 // Os04g0460600 // Os05g0562400 // Os02g0170300 // Os02g0469300
8	GO:0080090	P	regulation of primary metabolic process	11	134	1626	24075	0.3	1	// Os09g0501600 // Os01g0201700 // Os09g0423800 // Os09g0507200 // Os05g0203800 // Os12g0102300 // Os04g0460600 // Os06g0604000 // Os03g0327800 // Os05g0562400 // Os02g0170300
8	GO:0000166	F	nucleotide binding	22	134	3874	24075	0.5	1	// Os05g0537300 // Os04g0616400 // Os03g0142800 // Os01g0937400 // Os01g0709500 // Os02g0211000 // Os01g0681900 // Os03g0719300 // Os06g0496800 // Os04g0691100 // Os08g0398000 // Os01g0188400 // Os04g0689500 // Os05g0135700 // Os02g0693700 // Os02g0167300 // Os10g0363300 // Os03g0689300 // Os02g0469300 // Os03g0231800 // Os06g0671900 // Os06g0700700
8	GO:0001882	F	nucleoside binding	19	134	3257	24075	0.45	1	// Os03g0719300 // Os08g0398000 // Os01g0937400 // Os05g0537300 // Os04g0616400 // Os06g0496800 // Os05g0135700 // Os03g0142800 // Os04g0689500 // Os03g0231800 // Os02g0693700 // Os04g0691100 // Os06g0700700 // Os01g0709500 // Os02g0211000 // Os10g0363300 // Os03g0689300 // Os01g0681900 // Os02g0469300
8	GO:0001883	F	purine nucleoside binding	19	134	3247	24075	0.45	1	// Os03g0719300 // Os08g0398000 // Os01g0937400 // Os05g0537300 // Os04g0616400 // Os06g0496800 // Os05g0135700 // Os03g0142800 // Os04g0689500 // Os03g0231800 // Os02g0693700 // Os04g0691100 // Os06g0700700 // Os01g0709500 // Os02g0211000 // Os10g0363300 // Os03g0689300 // Os01g0681900 // Os02g0469300
8	GO:0003676	F	nucleic acid binding	14	134	8251	24075	1	1	// Os10g0516500 // Os01g0201700 // Os01g0598600 // Os09g0507200 // Os05g0203800 // Os06g0303700 // Os01g0889200 // Os12g0102300 // Os04g0460600 // Os06g0604000 // Os03g0327800 // Os05g0562400 // Os02g0170300 // Os09g0423800
8	GO:0003677	F	DNA binding	14	134	5059	24075	1	1	// Os10g0516500 // Os01g0201700 // Os01g0598600 // Os09g0507200 // Os05g0203800 // Os06g0303700 // Os01g0889200 // Os12g0102300 // Os04g0460600 // Os06g0604000 // Os03g0327800 // Os05g0562400 // Os02g0170300 // Os09g0423800
8	GO:0003700	F	transcription factor activity	8	134	651	24075	0.03	0.77	// Os01g0201700 // Os09g0423800 // Os09g0507200 // Os05g0203800 // Os12g0102300 // Os06g0604000 // Os05g0562400 // Os02g0170300
8	GO:0003824	F	catalytic activity	67	134	12724	24075	0.77	1	// Os01g0140100 // Os06g0671900 // Os05g0537300 // Os06g0496800 // Os04g0547900 // Os03g0142800 // Os09g0132900 // Os03g0685300 // Os06g0157000 // Os03g0220100 // Os01g0709500 // Os01g0133500 // Os01g0560000 // Os01g0728100 // Os02g0211000 // Os02g0626400 // Os08g0157500 // Os02g0244700 // Os12g0102300 // Os07g0693500 // Os04g0616400 // Os05g0349200 // Os12g0264500 // Os02g0575200 // Os06g0156600…
8	GO:0004672	F	protein kinase activity	6	134	1575	24075	0.88	1	// Os04g0616400 // Os06g0496800 // Os04g0689500 // Os04g0691100 // Os01g0709500 // Os02g0469300
8	GO:0004674	F	protein serine/threonine kinase activity	5	134	1478	24075	0.92	1	// Os04g0691100 // Os04g0689500 // Os01g0709500 // Os06g0496800 // Os04g0616400
8	GO:0005215	F	transporter activity	8	134	941	24075	0.16	1	// Os07g0448800 // Os02g0232900 // Os06g0581000 // Os03g0142800 // Os03g0687000 // Os02g0693700 // Os06g0700700 // Os03g0689300
8	GO:0005488	F	binding	66	134	16823	24075	1	1	// Os11g0115100 // Os10g0510500 // Os05g0537300 // Os06g0496800 // Os03g0142800 // Os01g0937400 // Os03g0582000 // Os04g0460600 // Os06g0604000 // Os01g0709500 // Os01g0560000 // Os02g0211000 // Os01g0889200 // Os12g0284000 // Os08g0157500 // Os01g0960500 // Os01g0681900 // Os07g0693500 // Os04g0616400 // Os01g0971100 // Os07g0694700 // Os05g0203800 // Os08g0482700 // Os09g0423800 // Os10g0521600…
8	GO:0005515	F	protein binding	12	134	2460	24075	0.73	1	// Os10g0510500 // Os05g0537300 // Os09g0507200 // Os04g0616400 // Os01g0971100 // Os07g0497100 // Os10g0521600 // Os07g0208500 // Os01g0560000 // Os07g0661400 // Os08g0157500 // Os01g0960500
8	GO:0005524	F	ATP binding	17	134	3085	24075	0.56	1	// Os03g0719300 // Os08g0398000 // Os01g0937400 // Os05g0537300 // Os04g0616400 // Os06g0496800 // Os03g0142800 // Os04g0689500 // Os05g0135700 // Os02g0693700 // Os04g0691100 // Os06g0700700 // Os01g0709500 // Os02g0211000 // Os10g0363300 // Os03g0689300 // Os02g0469300
8	GO:0008233	F	peptidase activity	8	134	1489	24075	0.59	1	// Os01g0140100 // Os02g0469600 // Os12g0102300 // Os03g0808500 // Os04g0691100 // Os08g0478500 // Os01g0598600 // Os01g0560000
8	GO:0008270	F	zinc ion binding	8	134	3939	24075	1	1	// Os07g0693500 // Os07g0497100 // Os09g0247700 // Os10g0521600 // Os07g0208500 // Os08g0478500 // Os01g0971100 // Os01g0960500
8	GO:0009055	F	electron carrier activity	5	134	599	24075	0.24	1	// Os03g0758500 // Os08g0482700 // Os11g0210100 // Os01g0681900 // Os04g0560100
8	GO:0016301	F	kinase activity	7	134	1750	24075	0.86	1	// Os03g0719300 // Os04g0616400 // Os06g0496800 // Os04g0689500 // Os04g0691100 // Os01g0709500 // Os02g0469300
8	GO:0016462	F	pyrophosphatase activity	9	134	743	24075	0.024	0.77	// Os05g0537300 // Os03g0142800 // Os06g0671900 // Os02g0693700 // Os02g0167300 // Os06g0700700 // Os08g0398000 // Os02g0211000 // Os03g0689300
8	GO:0016491	F	oxidoreductase activity	9	134	1672	24075	0.59	1	// Os04g0475600 // Os07g0694700 // Os01g0188400 // Os01g0151700 // Os03g0231800 // Os04g0560100 // Os09g0440300 // Os11g0210100 // Os01g0681900
8	GO:0016740	F	transferase activity	19	134	6190	24075	1	1	// Os03g0719300 // Os02g0469300 // Os04g0616400 // Os06g0496800 // Os03g0582000 // Os05g0135700 // Os12g0607000 // Os04g0689500 // Os03g0685300 // Os01g0889200 // Os03g0220100 // Os04g0691100 // Os07g0208500 // Os01g0709500 // Os12g0613200 // Os05g0426400 // Os09g0439100 // Os08g0157500 // Os01g0300200
8	GO:0016772	F	transferase activity, transferring phosphorus-containing groups	8	134	4781	24075	1	1	// Os03g0719300 // Os04g0616400 // Os06g0496800 // Os04g0689500 // Os01g0889200 // Os04g0691100 // Os01g0709500 // Os02g0469300
8	GO:0016773	F	phosphotransferase activity, alcohol group as acceptor	7	134	1726	24075	0.85	1	// Os03g0719300 // Os04g0616400 // Os06g0496800 // Os04g0689500 // Os04g0691100 // Os01g0709500 // Os02g0469300
8	GO:0016787	F	hydrolase activity	31	134	4901	24075	0.24	1	// Os01g0140100 // Os06g0671900 // Os05g0537300 // Os04g0547900 // Os03g0142800 // Os06g0157000 // Os01g0133500 // Os01g0560000 // Os01g0728100 // Os09g0132900 // Os03g0689300 // Os06g0148200 // Os07g0693500 // Os06g0156600 // Os04g0691100 // Os12g0102300 // Os06g0156700 // Os08g0398000 // Os06g0573600 // Os02g0469600 // Os02g0693700 // Os03g0808500 // Os02g0167300 // Os08g0478500 // Os01g0598600…
8	GO:0016788	F	hydrolase activity, acting on ester bonds	9	134	1949	24075	0.77	1	// Os06g0156600 // Os12g0566700 // Os06g0148200 // Os06g0156700 // Os08g0478500 // Os01g0728100 // Os09g0132900 // Os06g0157000 // Os07g0481200
8	GO:0016817	F	hydrolase activity, acting on acid anhydrides	9	134	764	24075	0.028	0.77	// Os05g0537300 // Os03g0142800 // Os06g0671900 // Os02g0693700 // Os02g0167300 // Os06g0700700 // Os08g0398000 // Os02g0211000 // Os03g0689300
8	GO:0016818	F	hydrolase activity, acting on acid anhydrides, in phosphorus-containing anhydrides	9	134	759	24075	0.027	0.77	// Os05g0537300 // Os03g0142800 // Os06g0671900 // Os02g0693700 // Os02g0167300 // Os06g0700700 // Os08g0398000 // Os02g0211000 // Os03g0689300
8	GO:0016874	F	ligase activity	5	134	305	24075	0.029	0.77	// Os02g0575200 // Os10g0363300 // Os02g0626400 // Os01g0300200 // Os02g0626100
8	GO:0016887	F	ATPase activity	6	134	355	24075	0.015	0.77	// Os03g0142800 // Os02g0693700 // Os06g0700700 // Os08g0398000 // Os02g0211000 // Os03g0689300
8	GO:0017076	F	purine nucleotide binding	21	134	3456	24075	0.37	1	// Os03g0719300 // Os08g0398000 // Os01g0937400 // Os05g0537300 // Os04g0616400 // Os06g0496800 // Os05g0135700 // Os03g0142800 // Os06g0671900 // Os04g0689500 // Os02g0167300 // Os03g0231800 // Os02g0693700 // Os04g0691100 // Os06g0700700 // Os01g0709500 // Os02g0211000 // Os10g0363300 // Os03g0689300 // Os01g0681900 // Os02g0469300
8	GO:0017111	F	nucleoside-triphosphatase activity	9	134	726	24075	0.021	0.77	// Os05g0537300 // Os03g0142800 // Os06g0671900 // Os02g0693700 // Os02g0167300 // Os06g0700700 // Os08g0398000 // Os02g0211000 // Os03g0689300
8	GO:0030528	F	transcription regulator activity	9	134	987	24075	0.1	1	// Os09g0501600 // Os01g0201700 // Os09g0423800 // Os09g0507200 // Os05g0203800 // Os12g0102300 // Os06g0604000 // Os05g0562400 // Os02g0170300
8	GO:0030554	F	adenyl nucleotide binding	19	134	3247	24075	0.45	1	// Os03g0719300 // Os08g0398000 // Os01g0937400 // Os05g0537300 // Os04g0616400 // Os06g0496800 // Os05g0135700 // Os03g0142800 // Os04g0689500 // Os03g0231800 // Os02g0693700 // Os04g0691100 // Os06g0700700 // Os01g0709500 // Os02g0211000 // Os10g0363300 // Os03g0689300 // Os01g0681900 // Os02g0469300
8	GO:0032553	F	ribonucleotide binding	19	134	3292	24075	0.47	1	// Os03g0719300 // Os08g0398000 // Os01g0937400 // Os05g0537300 // Os04g0616400 // Os06g0496800 // Os03g0142800 // Os06g0671900 // Os04g0689500 // Os02g0167300 // Os05g0135700 // Os02g0693700 // Os04g0691100 // Os06g0700700 // Os01g0709500 // Os02g0211000 // Os10g0363300 // Os03g0689300 // Os02g0469300
8	GO:0032555	F	purine ribonucleotide binding	19	134	3292	24075	0.47	1	// Os03g0719300 // Os08g0398000 // Os01g0937400 // Os05g0537300 // Os04g0616400 // Os06g0496800 // Os03g0142800 // Os06g0671900 // Os04g0689500 // Os02g0167300 // Os05g0135700 // Os02g0693700 // Os04g0691100 // Os06g0700700 // Os01g0709500 // Os02g0211000 // Os10g0363300 // Os03g0689300 // Os02g0469300
8	GO:0032559	F	adenyl ribonucleotide binding	17	134	3087	24075	0.56	1	// Os03g0719300 // Os08g0398000 // Os01g0937400 // Os05g0537300 // Os04g0616400 // Os06g0496800 // Os03g0142800 // Os04g0689500 // Os05g0135700 // Os02g0693700 // Os04g0691100 // Os06g0700700 // Os01g0709500 // Os02g0211000 // Os10g0363300 // Os03g0689300 // Os02g0469300
8	GO:0043167	F	ion binding	21	134	5700	24075	0.99	1	// Os01g0681900 // Os07g0208500 // Os07g0693500 // Os03g0255100 // Os07g0694700 // Os01g0188400 // Os08g0482700 // Os06g0700700 // Os10g0521600 // Os05g0135700 // Os04g0560100 // Os07g0497100 // Os11g0210100 // Os01g0971100 // Os08g0478500 // Os03g0758500 // Os08g0189100 // Os06g0573600 // Os01g0580200 // Os09g0247700 // Os01g0960500
8	GO:0043169	F	cation binding	21	134	5696	24075	0.99	1	// Os01g0681900 // Os07g0208500 // Os07g0693500 // Os03g0255100 // Os07g0694700 // Os01g0188400 // Os08g0482700 // Os06g0700700 // Os10g0521600 // Os05g0135700 // Os04g0560100 // Os07g0497100 // Os11g0210100 // Os01g0971100 // Os08g0478500 // Os03g0758500 // Os08g0189100 // Os06g0573600 // Os01g0580200 // Os09g0247700 // Os01g0960500
8	GO:0043565	F	sequence-specific DNA binding	6	134	453	24075	0.043	0.94	// Os01g0201700 // Os09g0507200 // Os05g0203800 // Os12g0102300 // Os05g0562400 // Os02g0170300
8	GO:0046872	F	metal ion binding	18	134	5476	24075	1	1	// Os01g0681900 // Os07g0208500 // Os07g0693500 // Os01g0971100 // Os07g0694700 // Os01g0188400 // Os08g0482700 // Os06g0700700 // Os10g0521600 // Os05g0135700 // Os04g0560100 // Os07g0497100 // Os11g0210100 // Os08g0478500 // Os03g0758500 // Os08g0189100 // Os09g0247700 // Os01g0960500
8	GO:0046914	F	transition metal ion binding	16	134	4875	24075	1	1	// Os01g0681900 // Os07g0208500 // Os07g0693500 // Os01g0971100 // Os07g0694700 // Os03g0758500 // Os09g0247700 // Os10g0521600 // Os05g0135700 // Os04g0560100 // Os11g0210100 // Os08g0478500 // Os07g0497100 // Os08g0189100 // Os08g0482700 // Os01g0960500
8	GO:0070011	F	peptidase activity, acting on L-amino acid peptides	6	134	1470	24075	0.83	1	// Os01g0140100 // Os02g0469600 // Os12g0102300 // Os04g0691100 // Os01g0598600 // Os01g0560000
8	GO:0005576	C	extracellular region	5	134	251	24075	0.014	0.067	// Os03g0255100 // Os08g0189100 // Os01g0580200 // Os06g0573600 // Os10g0556100
8	GO:0005622	C	intracellular	85	134	4116	24075	1.5e-32	1.2e-31	// Os05g0405900 // Os11g0115100 // Os10g0510500 // Os05g0537300 // Os03g0231800 // Os06g0496800 // Os02g0816900 // Os04g0547900 // Os03g0255100 // Os03g0227800 // Os03g0685300 // Os06g0604000 // Os01g0709500 // Os01g0889200 // Os01g0560000 // Os01g0728100 // Os09g0132900 // Os02g0626400 // Os12g0284000 // Os01g0960500 // Os09g0501600 // Os12g0102300 // Os04g0616400 // Os07g0694700 // Os05g0203800…
8	GO:0005623	C	cell	107	134	5945	24075	1.4e-40	1.9e-39	// Os05g0405900 // Os05g0537300 // Os02g0626400 // Os01g0960500 // Os07g0448800 // Os05g0203800 // Os11g0545300 // Os06g0156700 // Os03g0278000 // Os08g0265500 // Os02g0232900 // Os10g0148100 // Os01g0188400 // Os06g0303700 // Os06g0553200 // Os03g0808500 // Os07g0208500 // Os02g0109800 // Os10g0363300 // Os09g0439100 // Os06g0132500 // Os09g0403000 // Os10g0150800 // Os08g0189100 // Os08g0430700…
8	GO:0005634	C	nucleus	16	134	1884	24075	0.061	0.27	// Os09g0501600 // Os10g0516500 // Os01g0201700 // Os09g0423800 // Os09g0507200 // Os05g0203800 // Os06g0303700 // Os01g0889200 // Os12g0102300 // Os06g0604000 // Os12g0613200 // Os01g0182600 // Os08g0430700 // Os12g0284000 // Os05g0562400 // Os02g0170300
8	GO:0005737	C	cytoplasm	71	134	1263	24075	2.9e-53	1.2e-51	// Os05g0405900 // Os11g0115100 // Os10g0510500 // Os03g0231800 // Os06g0496800 // Os02g0816900 // Os04g0547900 // Os03g0227800 // Os03g0685300 // Os06g0604000 // Os01g0709500 // Os01g0560000 // Os01g0728100 // Os09g0132900 // Os02g0626400 // Os12g0284000 // Os01g0960500 // Os07g0638100 // Os04g0616400 // Os07g0694700 // Os08g0482700 // Os09g0423800 // Os11g0545300 // Os10g0478500 // Os06g0148200…
8	GO:0005739	C	mitochondrion	16	134	162	24075	3.5e-15	2.4e-14	// Os05g0405900 // Os01g0761300 // Os05g0366900 // Os10g0510500 // Os05g0426400 // Os05g0356700 // Os09g0403000 // Os03g0227800 // Os11g0545300 // Os01g0944200 // Os09g0323500 // Os06g0604000 // Os09g0456100 // Os03g0685300 // Os08g0265500 // Os01g0960500
8	GO:0009536	C	plastid	11	134	37	24075	1.9e-15	1.4e-14	// Os08g0535200 // Os05g0132100 // Os02g0816900 // Os04g0547900 // Os01g0188400 // Os06g0303700 // Os10g0478500 // Os01g0709500 // Os08g0398000 // Os09g0423800 // Os02g0109800
8	GO:0016020	C	membrane	28	134	2115	24075	1.5e-05	9.1e-05	// Os03g0142800 // Os09g0439100 // Os08g0535200 // Os07g0525100 // Os03g0220100 // Os03g0149300 // Os02g0211000 // Os04g0460600 // Os07g0693500 // Os07g0448800 // Os10g0198900 // Os06g0115000 // Os02g0809800 // Os02g0232900 // Os06g0581000 // Os04g0689500 // Os04g0560100 // Os02g0693700 // Os03g0255100 // Os07g0208500 // Os03g0689300 // Os03g0687000 // Os04g0475600 // Os01g0177900 // Os06g0700700…
8	GO:0016021	C	integral to membrane	12	134	752	24075	0.0011	0.0065	// Os07g0448800 // Os08g0535200 // Os02g0232900 // Os06g0700700 // Os02g0513100 // Os03g0231800 // Os02g0693700 // Os07g0208500 // Os03g0142800 // Os07g0693500 // Os03g0689300 // Os09g0439100
8	GO:0031224	C	intrinsic to membrane	12	134	775	24075	0.0014	0.0078	// Os07g0448800 // Os08g0535200 // Os02g0232900 // Os06g0700700 // Os02g0513100 // Os03g0231800 // Os02g0693700 // Os07g0208500 // Os03g0142800 // Os07g0693500 // Os03g0689300 // Os09g0439100
8	GO:0032991	C	macromolecular complex	5	134	1207	24075	0.81	1	// Os10g0363300 // Os02g0167300 // Os05g0537300 // Os06g0671900 // Os01g0889200
8	GO:0043226	C	organelle	80	134	2859	24075	3.1e-39	3.1e-38	// Os05g0405900 // Os11g0115100 // Os10g0510500 // Os05g0537300 // Os03g0231800 // Os06g0496800 // Os02g0816900 // Os04g0547900 // Os03g0255100 // Os03g0227800 // Os03g0685300 // Os06g0604000 // Os01g0709500 // Os01g0889200 // Os01g0560000 // Os01g0728100 // Os09g0132900 // Os01g0944200 // Os12g0284000 // Os01g0960500 // Os09g0501600 // Os12g0102300 // Os04g0616400 // Os05g0203800 // Os08g0482700…
8	GO:0043227	C	membrane-bounded organelle	77	134	2319	24075	1.7e-42	3.5e-41	// Os05g0405900 // Os11g0115100 // Os10g0510500 // Os03g0231800 // Os06g0496800 // Os02g0816900 // Os04g0547900 // Os03g0227800 // Os03g0685300 // Os06g0604000 // Os01g0709500 // Os01g0889200 // Os01g0560000 // Os01g0728100 // Os09g0132900 // Os01g0944200 // Os12g0284000 // Os01g0960500 // Os09g0501600 // Os12g0102300 // Os04g0616400 // Os05g0203800 // Os08g0482700 // Os09g0423800 // Os11g0545300…
8	GO:0043229	C	intracellular organelle	80	134	2859	24075	3.1e-39	3.1e-38	// Os05g0405900 // Os11g0115100 // Os10g0510500 // Os05g0537300 // Os03g0231800 // Os06g0496800 // Os02g0816900 // Os04g0547900 // Os03g0255100 // Os03g0227800 // Os03g0685300 // Os06g0604000 // Os01g0709500 // Os01g0889200 // Os01g0560000 // Os01g0728100 // Os09g0132900 // Os01g0944200 // Os12g0284000 // Os01g0960500 // Os09g0501600 // Os12g0102300 // Os04g0616400 // Os05g0203800 // Os08g0482700…
8	GO:0043231	C	intracellular membrane-bounded organelle	77	134	2296	24075	8.5e-43	2.3e-41	// Os05g0405900 // Os11g0115100 // Os10g0510500 // Os03g0231800 // Os06g0496800 // Os02g0816900 // Os04g0547900 // Os03g0227800 // Os03g0685300 // Os06g0604000 // Os01g0709500 // Os01g0889200 // Os01g0560000 // Os01g0728100 // Os09g0132900 // Os01g0944200 // Os12g0284000 // Os01g0960500 // Os09g0501600 // Os12g0102300 // Os04g0616400 // Os05g0203800 // Os08g0482700 // Os09g0423800 // Os11g0545300…
8	GO:0043234	C	protein complex	5	134	706	24075	0.36	1	// Os10g0363300 // Os02g0167300 // Os05g0537300 // Os06g0671900 // Os01g0889200
8	GO:0044422	C	organelle part	6	134	1521	24075	0.86	1	// Os05g0537300 // Os02g0167300 // Os01g0889200 // Os06g0671900 // Os01g0560000 // Os09g0439100
8	GO:0044424	C	intracellular part	85	134	3529	24075	1.5e-37	1.3e-36	// Os05g0405900 // Os11g0115100 // Os10g0510500 // Os05g0537300 // Os03g0231800 // Os06g0496800 // Os02g0816900 // Os04g0547900 // Os03g0255100 // Os03g0227800 // Os03g0685300 // Os06g0604000 // Os01g0709500 // Os01g0889200 // Os01g0560000 // Os01g0728100 // Os09g0132900 // Os02g0626400 // Os12g0284000 // Os01g0960500 // Os09g0501600 // Os12g0102300 // Os04g0616400 // Os07g0694700 // Os05g0203800…
8	GO:0044425	C	membrane part	12	134	1007	24075	0.011	0.056	// Os07g0448800 // Os08g0535200 // Os02g0232900 // Os06g0700700 // Os02g0513100 // Os03g0231800 // Os02g0693700 // Os07g0208500 // Os03g0142800 // Os07g0693500 // Os03g0689300 // Os09g0439100
8	GO:0044444	C	cytoplasmic part	67	134	966	24075	2.1e-55	1.7e-53	// Os05g0405900 // Os11g0115100 // Os10g0510500 // Os03g0231800 // Os06g0496800 // Os02g0816900 // Os04g0547900 // Os03g0227800 // Os03g0685300 // Os06g0604000 // Os01g0709500 // Os01g0560000 // Os01g0728100 // Os09g0132900 // Os01g0944200 // Os12g0284000 // Os01g0960500 // Os07g0638100 // Os04g0616400 // Os08g0482700 // Os09g0423800 // Os11g0545300 // Os10g0478500 // Os06g0148200 // Os06g0156700…
8	GO:0044446	C	intracellular organelle part	6	134	1521	24075	0.86	1	// Os05g0537300 // Os02g0167300 // Os01g0889200 // Os06g0671900 // Os01g0560000 // Os09g0439100
8	GO:0044464	C	cell part	107	134	5945	24075	1.4e-40	1.9e-39	// Os05g0405900 // Os05g0537300 // Os02g0626400 // Os01g0960500 // Os07g0448800 // Os05g0203800 // Os11g0545300 // Os06g0156700 // Os03g0278000 // Os08g0265500 // Os02g0232900 // Os10g0148100 // Os01g0188400 // Os06g0303700 // Os06g0553200 // Os03g0808500 // Os07g0208500 // Os02g0109800 // Os10g0363300 // Os09g0439100 // Os06g0132500 // Os09g0403000 // Os10g0150800 // Os08g0189100 // Os08g0430700…
queryitem 1	the number of genes annotated to the GO term in the query gene list
querytotal 2	the number of all the genes in the query gene list
bgitem 3	he number of genes annotated to the GO term in the entire background set
bgtotal 4	the number of all the genes in the entire background set
pvalue 5	using a Fisher’s tests about the frequency of genes annotated to each GO term in query gene list and entire background set
FDR 6	based on Benjamini & Hochberg correction using all GO terms

## Sheet: Table S5
Table S5. Cluster-specific genes in rice seed endosperm
gene	p_val 1	avg_log2FC 2	pct.1 3	pct.2 4	p_val_adj 5	cluster	Symbol	Name	Description	PMID
Os08g0290700	4.65992e-67	0.681647	0.38	0.096	9.44939e-63	1			Winged helix repressor DNA-binding domain containing protein.
Os02g0185900	1.79204e-51	0.378294	0.201	0.027	3.6339e-47	1			Hypothetical conserved gene.
[truncated: 408 more rows]

## Sheet: Table S6
Table S6. GO for marker genes in rice endosperm
[truncated: 685 more rows]

## Sheet: Table S7A
Table S7A. Maternally expressed genes list
[truncated: 213 more rows]

## Sheet: Table S7B
Table S7B Paternally expressed genes list
[truncated: 180 more rows]

[truncated: 2 more sheets: Table S8, Table S9]
